# Supplementary material for: Quantitative analysis of suture lines in Carboniferous ammonoids
Source: Copernicus journal article supplement (doi:10.5194/fr-21-223-2018), 2018-09-11
Supplement: Supplementary file 1 [file fr-21-223-2018-supplement.zip]

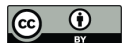

*Supplement of*

## **Quantitative analysis of suture lines in Carboniferous ammonoids**

**Michael Wegerer et al.**

*Correspondence to:* Dieter Korn ([dieter.korn@mf-n-berlin.de](mailto:dieter.korn@mf-n-berlin.de))

- [fr-21-223-2018-supplement-title-page.pdf](#)
- [Fouier analysis 1.xls](#)
- [Fouier analysis 2.xls](#)
- [metric data analysis.xls](#)

The copyright of individual parts of the supplement might differ from the CC BY 4.0 License.
