# Supplementary material for: Quantitative analysis of suture lines in Carboniferous ammonoids
Source: Copernicus journal article supplement (doi:10.5194/fr-21-223-2018), 2018-09-11
Supplement: Supplementary file 2 [file fr-21-223-2018-supplement.zip]

Archive with 4 entries (4 files):
- Fouier analysis 2.xls
- metric data analysis.xls
- fr-21-223-2018-supplement-title-page.pdf
- Fouier analysis 1.xls
