# Supplementary material for: Quantitative analysis of suture lines in Carboniferous ammonoids
Source: Copernicus journal article supplement (doi:10.5194/fr-21-223-2018), 2018-09-11
Supplement: Supplementary file 2 [file fr-21-223-2018-supplement.zip › Fouier analysis 1.xls]

## Sheet: taxonomy
Pericycloidea	Pericyclidae	Ammonellipsites conradae
Pericycloidea	Pericyclidae	Ammonellipsites menchikoffi
Pericycloidea	Muensteroceratidae	Eoglyphioceras minutum
Pericycloidea	Muensteroceratidae	Eurites commutatus
Pericycloidea	Muensteroceratidae	Eurites pondus
Pericycloidea	Muensteroceratidae	Eurites temertassetensis
Pericycloidea	Muensteroceratidae	Itimaites parabolicus
Pericycloidea	Muensteroceratidae	Muensteroceras fabrei
Pericycloidea	Muensteroceratidae	Trimorphoceras absolutum
Pericycloidea	Muensteroceratidae	Trimorphoceras azzelmattiense
Pericycloidea	Muensteroceratidae	Trimorphoceras crassilens
Pericycloidea	Maxigoniatitidae	Benimehlalites belkassemensis
Pericycloidea	Maxigoniatitidae	Benimehlalites benimehlalensis
Pericycloidea	Maxigoniatitidae	Bollandites nitens
Pericycloidea	Maxigoniatitidae	Bollandoceras mirrih
Pericycloidea	Maxigoniatitidae	Dzhaprakoceras dzazairense
Pericycloidea	Maxigoniatitidae	Goniatites stenumbilicatus
Pericycloidea	Maxigoniatitidae	Gourarites hagaraswad
Pericycloidea	Maxigoniatitidae	Gourarites mustari
Pericycloidea	Maxigoniatitidae	Semibollandites qawiy
Pericycloidea	Maxigoniatitidae	Timimounia lunula
Girtyoceratoidea	Girtyoceratidae	Calygirtyoceras zrigatense
Girtyoceratoidea	Girtyoceratidae	Girtyoceras ibnkhaldouni
Girtyoceratoidea	Girtyoceratidae	Girtyoceras luscinia
Neoglyphioceratoidea	Neoglyphioceratidae	Lusitanites circularis
Goniatitoidea	Goniatitidae	Arnsbergites arnsbergensis
Goniatitoidea	Goniatitidae	Arnsbergites ferrus
Goniatitoidea	Goniatitidae	Arnsbergites proiecturus
Goniatitoidea	Goniatitidae	Arnsbergites rufus
Goniatitoidea	Goniatitidae	Arnsbergites sphaericostriatus
Goniatitoidea	Goniatitidae	Arnsbergites warslowensis
Goniatitoidea	Goniatitidae	Goniatites americanus
Goniatitoidea	Goniatitidae	Goniatites crenistria
Goniatitoidea	Goniatitidae	Goniatites deceptus
Goniatitoidea	Goniatitidae	Goniatites eganensis
Goniatitoidea	Goniatitidae	Goniatites evelinae
Goniatitoidea	Goniatitidae	Goniatites gerberi
Goniatitoidea	Goniatitidae	Goniatites globostriatus
Goniatitoidea	Goniatitidae	Goniatites hudsoni
Goniatitoidea	Goniatitidae	Goniatites moorei
Goniatitoidea	Goniatitidae	Goniatites rodioni
Goniatitoidea	Goniatitidae	Goniatites sphaericus
Goniatitoidea	Goniatitidae	Hammatocyclus pollex
Goniatitoidea	Goniatitidae	Hibernicoceras artilobatum
Goniatitoidea	Goniatitidae	Hibernicoceras carraunense
Goniatitoidea	Goniatitidae	Hibernicoceras touissitense
Goniatitoidea	Goniatitidae	Hypergoniatites fusiger
Goniatitoidea	Goniatitidae	Neogoniatites worki
Goniatitoidea	Goniatitidae	Paraglyphioceras celeris
Goniatitoidea	Goniatitidae	Paraglyphioceras rudis
Goniatitoidea	Goniatitidae	Sudeticeras fornicum
Goniatitoidea	Goniatitidae	Sudeticeras horoni
Goniatitoidea	Goniatitidae	Sudeticeras ibnbajjahi
Goniatitoidea	Goniatitidae	Sudeticeras murracaoense
Goniatitoidea	Goniatitidae	Sudeticeras occultornatum
Goniatitoidea	Goniatitidae	Sudeticeras pusillobatum
Goniatitoidea	Goniatitidae	Sudeticeras splendens
Goniatitoidea	Delepinoceratidae	Lusitanoceras zirari
Goniatitoidea	Delepinoceratidae	Platygoniatites rhanemensis
Goniatitoidea	Delepinoceratidae	Platygoniatites rhanemensis
Goniatitoidea	Delepinoceratidae	Revilloceras bellornatum
Goniatitoidea	Delepinoceratidae	Revilloceras granofalcatum

## Sheet: Fourier coeff E lobe
species	source	coeff1	coeff2	coeff3	coeff4	coeff5	coeff6	coeff7	coeff8	coeff9	coeff10	coeff11	coeff12	coeff13	coeff14	coeff15	coeff16	coeff17	coeff18	coeff19	coeff20	coeff21	coeff22	coeff23	coeff24	coeff25	coeff26	coeff27	coeff28	coeff29	coeff30	coeff31	coeff32	coeff33	coeff34	coeff35	coeff36	coeff37	coeff38	coeff39	coeff40	coeff41	coeff42	coeff43	coeff44	coeff45	coeff46	coeff47	coeff48
Ammonellipsites conradae	Ebbighausen et al. (2010, text-fig. 18B)	0.679489	-0.733686	0.513768	0.475229	-0.00825113	-0.112895	0.150043	-0.0125255	0.190975	0.152129	0.109107	-0.137851	-0.0855871	0.0128419	-0.00736468	-0.046415	0.0502076	-0.07378	0.00460266	0.00304538	0.00619787	0.0270722	0.036498	-0.00879656	0.016486	0.00951102	0.0149429	-0.0268078	-0.0133787	0.00410031	-0.0091324	-0.0287958	0.0106503	-0.0221827	0.0133898	0.006378	0.00487622	0.0126309	0.00037059	-0.000445428	-0.00111268	-0.00049584	0.00795471	-0.020922	0.00093434	-0.000404591	-0.00296324	-0.00598516
Ammonellipsites menchikoffi	Ebbighausen et al. (2010, text-fig. 16B)	0.603226	-0.797564	0.533765	0.406783	-0.00523531	-0.0127801	0.145995	-0.0368114	0.184085	0.0689351	0.0644745	-0.163378	-0.0604462	0.0399523	-0.0226835	-0.0376218	0.00615308	-0.0849428	0.0209433	0.00273616	0.0391941	0.0339917	0.0280529	-0.0286263	-0.00286267	0.0010806	-0.00625067	-0.0359431	4.90602e-05	4.10157e-05	-0.00899653	-0.00475699	-0.00712244	-0.0134351	0.00860823	-0.00387062	0.018164	0.00273002	0.00227276	-0.00853594	-0.00606816	0.00625959	-0.0134818	-0.0148764	-0.00101439	-0.00708234	-0.00146687	-0.000540964
Ammonellipsites menchikoffi	Ebbighausen et al. (2010, text-fig. 16C)	0.69024	-0.723551	0.449032	0.435352	-0.00326604	-0.091881	0.201952	-0.0067226	0.156942	0.137977	0.0929864	-0.103831	-0.0760283	0.00600214	-0.00359737	-0.0425121	0.0584278	-0.0723389	0.00105896	0.00168638	0.00395626	0.0316064	0.0355718	-0.00418707	0.00675164	0.00473941	0.0207248	-0.0274572	-0.0100283	0.00169881	-0.00223024	-0.0148867	0.0157294	-0.0236535	0.00456216	0.00324908	0.00361403	0.0166167	0.00190996	-0.000319376	-0.00700624	-0.00445829	0.0104948	-0.0158512	0.00589705	-0.00149922	-0.00150747	-0.0056063
Arnsbergites arnsbergensis	Korn (1988, text-fig. 48B)	0.573909	-0.742967	0.792158	0.610307	-0.0501806	-0.191848	0.252559	-0.0663693	0.330678	0.140382	0.0669462	-0.159052	-0.104303	0.0587857	-0.00545082	-0.00972248	0.00858984	-0.0581887	0.0570443	0.0080803	0.00124953	0.00129476	0.057821	-0.0563248	0.0453239	-0.00484688	0.000962428	0.00840309	-0.0123511	0.0201923	-0.000282497	-0.000288046	-0.00501021	-0.0132305	0.0246275	-0.00954966	0.00209098	0.00071385	0.00493542	-0.0170829	0.00852755	-0.00607718	0.000802017	0.0011142	0.000108708	-0.00113083	0.00571602	6.61927e-05
Arnsbergites ferrus	Korn & Ebbighausen (2008, text-fig. 31G)	0.620156	-0.716548	0.755461	0.655186	-0.051615	-0.365311	0.310398	-0.0447603	0.34271	0.221355	0.0921461	-0.143159	-0.0934823	0.0268453	-0.00651515	-0.022701	0.0182502	-0.0396061	0.0297703	0.013762	-0.0142106	-0.0312751	0.067984	-0.0310186	0.0504796	0.0149488	0.00487822	-0.0165927	-0.00400609	0.00252477	-0.00526097	-0.00841135	6.63476e-05	-0.00115564	0.0274642	0.00410447	-0.00796874	-0.00941447	0.00971644	-0.00826167	0.00532995	-1.45286e-05	-0.000105547	-0.00846487	0.0134995	-0.015292	-0.00262251	-0.00209187
Arnsbergites proiecturus	Korn & Ebbighausen (2008, text-fig. 35C)	0.737685	-0.675145	0.488643	0.533284	0.0211922	-0.250724	0.262148	0.0235396	0.199305	0.258594	0.138784	-0.106435	-0.109773	-0.0187642	0.00896271	-0.0505694	0.0698282	-0.0447564	0.00236957	0.00410391	0.00104145	-0.00383779	0.0650166	0.0173065	0.0165003	0.0315823	0.0159469	-0.00816388	-0.0178641	-0.00632894	0.00901681	-0.0248359	0.0175891	-0.00736986	0.00339886	0.00776798	0.00213303	-0.00447386	0.0107156	0.00522734	0.00272883	0.00879153	0.012679	-0.00395084	-0.00167885	-0.000942465	0.0049571	-0.00866115
Arnsbergites rufus	Korn & Ebbighausen (2008, text-fig. 38B)	0.729775	-0.683687	0.579117	0.618304	0.0257243	-0.409765	0.302427	0.0201538	0.236257	0.285693	0.120783	-0.0991534	-0.0934904	-0.0117392	0.00525075	-0.0400506	0.0488918	-0.0353438	-0.00287457	-0.00374702	0.00878868	-0.0455281	0.0642763	0.0125814	0.0236109	0.0369288	0.0100309	-0.00596893	-0.00655758	-0.00160469	0.00521315	-0.0204413	0.00830723	-0.00454549	0.00038876	0.000283478	0.00540791	-0.0158696	0.00300872	0.000974707	0.00100292	0.00238701	0.0104141	-0.00461824	0.0143009	0.00542481	0.00492953	-0.0113957
Arnsbergites sphaericostriatus	Korn & Ebbighausen (2008, text-fig. 28D)	0.739548	-0.673098	0.504528	0.551636	0.0295773	-0.315037	0.284464	0.0250008	0.205706	0.273479	0.118955	-0.0902598	-0.0979587	-0.0184751	0.0110076	-0.0604022	0.060406	-0.0371801	0.000441948	0.000308937	0.00678576	-0.0230256	0.0540481	0.0151275	0.0195318	0.0400049	0.0174394	-0.00913839	-0.0156687	-0.00621917	0.0118973	-0.0309115	0.013985	-0.00517032	0.0019911	0.00550836	0.00396024	-0.00794072	0.00756203	0.00341514	0.00160953	0.00560267	0.0142995	-0.00433851	0.00530073	0.00358363	0.00636607	-0.0105291
Arnsbergites warslowensis	Korn & Ebbighausen (2008, text-fig. 26C)	0.662454	-0.74909	0.691521	0.613739	-0.0313354	-0.265925	0.332836	-0.0408207	0.293378	0.203605	0.0706384	-0.10177	-0.105814	0.0253715	-0.000414698	-0.000953272	0.039561	-0.0748344	0.00452492	0.001994	0.00125133	0.00351564	0.0749533	-0.0280231	0.0405499	0.0155177	-0.000367395	0.000410989	-0.0128689	0.00647622	-0.00877464	-0.0173868	0.0040971	-0.0161506	0.0212618	0.0054225	-0.000933825	-0.00115496	0.0116768	-0.0079495	0.014851	0.0017332	0.0012165	-0.0104128	-4.45029e-05	7.77776e-05	-0.000414609	-0.000587157
Benimehlalites belkassemensis	Bockwinkel et al. (2010, text-fig. 32C)	0.456268	-0.889841	0.788494	0.405142	0.122729	0.170671	0.226648	-0.162444	0.11913	-0.0180182	-0.0253727	-0.167959	-0.0230635	0.06897	0.0608282	0.0205019	-0.0297377	-0.0305886	0.0505519	-0.0490952	0.057061	-0.0175455	-0.0148001	-0.0483945	-0.00683304	0.0389464	0.0249561	0.00459402	-0.0140764	-0.0107562	0.0115843	-0.0153157	0.0097495	-0.00461318	-0.00874613	-0.0180546	4.89372e-05	-0.00101768	-0.00482618	-0.000291673	0.00925118	0.0050665	0.00840669	-0.0152098	-0.0109244	0.00734107	-0.00508414	-0.00758976
Benimehlalites benimehlalensis	Bockwinkel et al. (2010, text-fig. 30B)	0.609546	-0.792733	0.521904	0.406368	0.0334107	0.125079	0.200848	-0.0516481	0.109434	0.0461606	0.0662778	-0.154126	-0.0301706	0.0167209	-0.00322914	-0.00460541	0.00606742	-0.041552	0.0267914	0.00426417	0.0351086	0.0359068	0.0436532	-0.0418228	-0.0148837	0.00183809	-0.0029304	-0.0265569	0.00135154	-0.00262634	0.0128411	0.00778184	-0.00186111	-0.00541968	0.0126495	-0.00460825	0.0173133	0.00542282	0.00496935	-0.0162626	-0.0166576	0.0116041	-0.00356722	-0.00522239	0.00095385	-0.020195	0.00643914	0.000393486
Bollandites nitens	Bockwinkel et al. (2010, 20% extended)	0.554047	-0.832477	0.712374	0.471865	0.0741533	0.17718	0.244947	-0.102804	0.128625	0.0247146	0.0345849	-0.181198	-0.0539279	0.055135	0.0378335	0.0368475	-0.0100125	-0.0469343	0.068874	-0.0144129	0.0569368	0.0226322	0.0191162	-0.0488128	-0.0320904	0.0223875	0.00513426	0.0074281	-0.000338854	-0.016702	0.034392	-0.000863677	0.00620213	0.00406869	0.00416217	-0.0064302	0.00273252	-0.00118248	-0.00550972	-0.0123024	-0.00157404	0.00968274	0.0124463	0.00216565	-0.00819292	-0.00751112	0.00940873	-0.0102354
Bollandites nitens	Bockwinkel et al. (2010, text-fig. 15E)	0.640389	-0.767745	0.641423	0.550117	0.00315008	0.0154123	0.195936	-0.0291174	0.203041	0.115485	0.108203	-0.184664	-0.0837395	0.0311937	-0.00142098	-0.00193906	0.0180059	-0.0513832	0.0535648	0.0213739	0.0170895	0.0283594	0.0426568	-0.0228373	0.0201603	0.00335779	0.00676732	-0.038532	-0.0240773	0.0207361	0.0146002	0.0176949	-0.000402406	-0.0303825	0.0262162	0.000804262	0.0212844	0.0173676	0.00477951	-0.00433636	-0.014435	0.00262437	-0.00153037	-0.0101545	0.00396268	-0.00663162	0.00710519	0.00456304
Bollandites nitens	Bockwinkel et al. (2010, text-fig. 15G)	0.634654	-0.772789	0.530868	0.439154	0.0258478	0.130496	0.22117	-0.0419804	0.120268	0.0643758	0.0883318	-0.163537	-0.0526605	0.021878	0.00142417	0.00384904	0.0157665	-0.0520539	0.0429328	0.0137435	0.0347753	0.0522007	0.0495544	-0.0322953	-0.029175	-0.00286882	0.00190873	-0.0183083	0.0105728	-0.0105857	0.0137773	0.013784	0.000547559	0.00597455	0.00929974	-0.000449054	0.00585589	0.00394608	0.0123461	-0.0177062	-0.0102161	0.00307648	-0.000489138	-0.00159412	0.00434998	-0.0105718	0.00763992	0.00321144
Bollandoceras mirrih	Bockwinkel et al. (2010, text-fig. 25D)	0.590363	-0.807133	0.641242	0.470973	0.0408232	0.128212	0.174814	-0.0551987	0.109034	0.0367011	0.0489856	-0.145339	-0.0224679	0.0157538	0.0113393	0.0163652	0.000611797	-0.0343674	0.0210588	0.000406047	0.0379884	0.0287626	0.041646	-0.0547601	-0.0125722	0.00378439	-0.00501974	-0.0171186	-1.77384e-05	-0.000301372	0.0317619	0.0113756	-0.00394011	-0.00597175	0.00715425	-0.00478043	0.0189055	0.000672289	0.000702626	-0.0169479	-0.0121248	0.0152889	0.00317726	0.00264338	-0.00470659	-0.0170266	0.00844286	-0.00245862
Bollandoceras mirrih	Bockwinkel et al. (2010, text-fig. 25E)	0.597195	-0.801985	0.594445	0.431339	0.0124485	0.0445833	0.179369	-0.0568413	0.154919	0.0551856	0.0518355	-0.151737	-0.0385397	0.0265274	-0.00396384	-0.0069856	0.00240952	-0.0559878	0.0181663	-0.000422262	0.0342305	0.0281796	0.0345263	-0.0433624	0.00148172	-0.000343364	-0.0101534	-0.0372011	-0.00258612	0.007077	0.0207464	0.00823589	-0.010211	-0.0158224	0.00386849	-0.00323878	0.0264407	0.00203217	0.00119789	-0.0157969	-0.011451	0.0137895	-0.012964	-0.0108916	-0.00372446	-0.0143481	0.0136363	-0.00335395
Calygirtyoceras zrigatense	Klug et al. (2006, text-fig. 12)	0.686086	-0.727519	0.647728	0.611531	-0.0137938	-0.266499	0.284541	-0.0170521	0.264055	0.224212	0.11613	-0.139123	-0.0803062	0.00821488	-0.00510088	-0.0484742	0.0280364	-0.0367025	0.0533569	0.0402639	-0.00436263	-0.0254863	0.0140288	-0.00298515	0.0514906	0.0345024	0.0190738	-0.0289443	-0.0214645	0.0047397	-0.0097439	-0.0423247	0.00662242	-0.0112622	0.0271153	0.0157096	0.00140216	0.00468228	0.0194439	-0.00564895	-0.00351935	-0.00186599	0.00414894	-0.00875491	0.0171824	-0.00591642	-0.00404776	-0.0117674
Dzhaprakoceras dzazairense	Ebbighausen et al. (2010, text-fig. 42L)	0.698038	-0.716061	0.419791	0.409508	-0.000490135	-0.00388712	0.181457	-0.00355377	0.142052	0.130683	0.134264	-0.145	-0.0749542	0.00432306	-0.0023917	-0.0489233	0.0512266	-0.058678	0.0162528	0.0146025	0.00350915	0.0433578	0.0499625	-0.00375465	0.000993413	0.000712259	0.0196361	-0.0232047	-0.010566	0.00141586	-0.00172365	-0.0152734	0.0151629	-0.0198298	0.00876684	0.00683322	0.00369454	0.0244169	0.00888199	-0.00108115	-0.0147514	-0.0104323	0.0101846	-0.0132959	0.0134858	-0.00253735	-0.000707037	-0.00453948
Eoglyphioceras minutum	Korn & Ebbighausen (2008, text-fig. 6B)	0.605028	-0.796204	0.550446	0.418476	0.0467965	0.168358	0.221214	-0.0610484	0.102759	0.040744	0.0758712	-0.190191	-0.0473596	0.0285597	0.00751568	0.0122615	0.00545431	-0.0499901	0.0722979	0.00817484	0.045438	0.0428256	0.0269103	-0.028347	-0.0405495	0.00668103	-0.00303318	-0.0181102	0.012947	-0.0243606	0.0180081	0.00964151	0.00803017	0.0170121	0.0145373	-0.00687403	-0.00792689	-0.00174508	0.00278931	-0.0116044	0.00124287	-0.000963496	-0.0037025	-0.00414502	-1.05344e-05	-0.00188691	0.0135575	-0.000700633
Eurites commutatus	Ebbighausen et al. (2010, text-fig. 25G)	0.531375	-0.847132	0.683806	0.427046	0.0753045	0.153826	0.241601	-0.120701	0.145908	0.0174914	0.0237202	-0.210512	-0.0529559	0.0647516	0.0444476	0.0356091	-0.0168078	-0.0512425	0.0609401	-0.022823	0.0582187	0.0140677	0.0110807	-0.0516914	-0.0197724	0.0193703	0.00127438	0.00144322	-0.00109369	-0.00466359	0.0230834	-0.00598774	-0.00442718	-0.00190254	0.00571081	-0.0178242	0.0141774	-0.0104143	-0.00627449	-0.0073241	0.00146296	0.0206682	0.00390337	-0.00079365	-0.0161899	-0.00874766	0.005847	-0.0125984
Eurites pondus	Ebbighausen et al. (2010, text-fig. 26C)	0.661264	-0.750132	0.476058	0.425382	0.0118844	0.0882975	0.196749	-0.0240518	0.12089	0.0836657	0.126301	-0.182385	-0.0588419	0.0137582	0.00171511	0.0089218	0.0315364	-0.0590838	0.0364793	0.0191774	0.0196366	0.0521916	0.043647	-0.0165303	-0.0162727	-0.00639056	0.0082963	-0.0218764	0.00756907	-0.00391085	0.00183721	0.00389213	0.0017535	-0.00677497	0.00992442	0.00232325	0.00998505	0.0147401	0.0146117	-0.0100287	-0.0153578	-0.00205407	0.00122962	-0.0104902	0.0122755	-0.0105371	0.00214078	0.00239291
Eurites temertassetensis	Korn et al. (2010, text-fig. 8F)	0.681967	-0.731382	0.41194	0.385322	0.00612343	0.0774521	0.239036	-0.0186084	0.0968959	0.079662	0.119645	-0.147458	-0.0235463	0.00292709	-0.00254713	-0.0190203	0.0134803	-0.0198405	0.0399686	0.028378	0.00106838	-0.00105258	0.0311233	-0.00741256	0.0302549	0.0206991	0.0186051	-0.0301726	-0.0364448	0.00770219	7.55792e-05	0.00190713	0.0221396	-0.0370822	0.0087894	0.00438938	0.0101389	0.0356102	0.0119625	-0.00499554	-0.0197349	-0.0105145	0.00713207	-0.0156533	0.0129836	-0.00430574	0.00175331	0.00541065
Girtyoceras ibnkhaldouni	Korn & Ebbighausen (2008, text-fig. 10C)	0.44626	-0.591628	0.801883	0.597446	-0.0639949	-0.213292	0.3025	-0.0884457	0.284449	0.106216	0.0441523	-0.117785	-0.0136364	0.00880055	0.0105978	0.0167386	-0.00349378	0.0589776	0.0677539	0.00479669	-0.0609292	-0.0510525	0.0338378	-0.0395166	0.0871011	-0.020004	0.00269619	0.0103448	-0.0136877	0.0329909	0.00701033	0.00338101	-0.00684124	-0.00998667	0.0171777	-0.00936351	0.0174694	0.00177936	0.00291845	-0.021653	-0.0102195	0.0112934	0.00900014	0.00858663	-0.00368895	-0.0214613	0.0112633	-0.00164764
Girtyoceras luscinia	Korn & Ebbighausen (2008, text-fig. 8D)	0.265938	-0.52059	0.893673	0.448691	-0.0300723	-0.0393904	0.227942	-0.168025	0.215596	-0.0352147	-0.00514078	-0.0327634	-0.0162108	0.0509925	0.058436	0.0180785	0.0295851	0.0290468	0.0464631	-0.0482946	-0.0492109	0.0170547	-0.00135672	-0.00421592	0.00934655	-0.067491	0.0322191	0.00411509	0.0442184	0.0307241	0.00805071	-0.0115215	-0.0168109	0.00950298	-0.00243027	-0.00436713	-0.000603473	-0.0100677	0.00908618	-0.000393398	0.00905255	0.00417532	0.00747875	-0.0162141	-0.00497963	0.00405704	0.00212561	0.00257815
Goniatites americanus	Korn & Titus (2011, text-fig. 42B)	0.422393	-0.826034	0.889901	0.456148	0.130493	0.181531	0.240324	-0.170055	0.09981	-0.016476	-0.0172545	-0.104648	-0.0217586	0.0696024	0.0959031	0.0317538	-0.0271567	-0.0260245	0.0462463	-0.0445154	0.047577	-0.016029	-0.00414015	-0.0134814	-0.0046994	0.0321089	0.0271232	0.00531105	-0.00701293	-0.00494187	0.0191603	-0.0261964	0.00110254	-0.000358277	0.00150956	0.00161919	-0.000414298	-0.00928316	0.0079331	0.000719747	0.0163961	0.0076566	0.00740141	-0.0136051	-0.0139097	0.0109419	-0.00329674	-0.00454498
Goniatites americanus	Korn & Titus (2011, text-fig. 42C)	0.584626	-0.811303	0.504321	0.36398	-0.0211424	-0.0609734	0.179789	-0.0592415	0.210971	0.0647645	0.0527098	-0.169199	-0.0713213	0.0546295	-0.0225804	-0.0304974	-0.00277033	-0.0998365	0.00829342	-4.14135e-05	0.041522	0.0281489	0.0275019	-0.0394794	-0.00372439	0.00150909	-0.00809097	-0.0230833	6.77089e-05	-0.000350841	-0.0202542	-0.00583571	-0.0104588	-0.0131179	0.00483478	-0.00399404	0.0131962	-0.000621552	-0.000199848	-0.0103917	-0.00206398	0.00321438	-0.0144911	-0.00966626	-0.000354702	-0.000810319	-0.00497429	0.00176815
Goniatites americanus	Korn & Titus (2011, text-fig. 43G)	0.717722	-0.696329	0.387247	0.397862	0.00322832	-0.109442	0.210664	0.00565788	0.137685	0.150573	0.114269	-0.104897	-0.0812505	-0.00464719	0.00208859	-0.0382147	0.0718183	-0.062005	-0.00214101	-0.00285795	-0.00216288	0.0243524	0.0350905	0.003122	0.00491833	0.00611636	0.0204857	-0.0168763	-0.0142407	-0.00166871	0.00266689	-0.0233355	0.02445	-0.0186823	0.00232634	0.00297124	-0.00232827	0.0158031	0.000986579	2.06837e-05	-0.00656789	-0.00904028	0.0128322	-0.00915978	0.0046243	0.000818895	0.00148572	-0.00873422
Goniatites americanus	Korn & Titus (2011, text-fig. 43H)	0.699015	-0.715106	0.483128	0.471166	-0.00592352	-0.185621	0.230298	-0.00453303	0.19434	0.178247	0.114883	-0.123604	-0.0882357	0.0057296	-0.00144848	-0.0314839	0.0524865	-0.0604474	0.00415135	0.00394856	-0.000224427	-0.00398156	0.0375149	-0.00264439	0.029587	0.0241423	0.0198026	-0.0230623	-0.0284806	0.00350604	-0.00262473	-0.0237555	0.0201143	-0.0260333	0.00519179	0.0042859	0.00157571	0.00864775	0.012121	-0.00170525	-0.00199863	-0.00118037	0.00671688	-0.00855584	0.00263785	-0.000612911	-0.00162829	-0.0107177
Goniatites americanus	Korn & Titus (2011, text-fig. 43I)	0.686749	-0.726893	0.482479	0.457377	-0.0037255	-0.124811	0.232104	-0.0152807	0.166039	0.145731	0.0897924	-0.105286	-0.0725398	0.00504941	-0.00394936	-0.0313756	0.0490706	-0.0617749	0.00753807	0.00509946	0.000912104	0.005827	0.0445392	-0.00765129	0.0234569	0.0176286	0.0141311	-0.0213239	-0.0266847	0.00371005	-0.00203834	-0.0099318	0.0232617	-0.0340929	0.00341543	0.00231366	0.00357529	0.0205383	0.00962996	-0.0030112	-0.00857132	-0.00625561	0.00441666	-0.00889889	0.00806362	-0.00143105	-0.00315775	-0.0101078
Goniatites americanus	Korn & Titus (2011, text-fig. 43J)	0.61195	-0.790858	0.738729	0.575073	-0.045646	-0.190772	0.307189	-0.0803667	0.319677	0.142774	0.0806333	-0.183191	-0.113533	0.0589306	0.0194411	0.0371197	0.0155335	-0.0867506	0.0356279	0.00488372	0.00806279	0.00928136	0.0476875	-0.0438585	0.0437468	-0.00346268	-0.000746366	-0.00193662	-0.0112261	0.0162102	-0.00531573	-0.00415469	-0.00554091	-0.0167652	0.0255402	-0.00865447	0.00362289	0.00131444	0.00321854	-0.0112042	0.0129555	-0.00834525	-0.00595262	-0.00953168	-0.000643423	0.00530364	0.00805505	0.000634395
Goniatites crenistria	Korn (1988, text-fig. 33A)	0.62192	-0.783079	0.563603	0.448986	-0.0132524	-0.0610761	0.216467	-0.050733	0.183829	0.0890018	0.0637752	-0.132386	-0.0755318	0.0353565	-0.000518034	-0.000489229	0.0229912	-0.0993581	0.0270853	0.00579766	0.0274523	0.0350218	0.0360077	-0.0290052	-0.00410412	-0.000284455	-0.000155962	-0.00971599	0.00208794	-0.00269931	-0.00689217	-0.00558939	-0.0049166	-0.0209738	0.0155551	-0.00370148	0.0129461	0.00638579	0.00327525	-0.0071205	-0.00496377	0.00224321	-0.00444718	-0.00952739	0.00142008	-0.00685652	-0.000207231	8.49546e-05
Goniatites crenistria	Korn (1988, text-fig. 33B)	0.577404	-0.816458	0.572093	0.404195	-0.00113211	-0.00637876	0.210472	-0.0763	0.139199	0.0413203	0.034405	-0.119753	-0.0430474	0.0325153	0.015091	0.0194537	-0.00448868	-0.0963236	0.0183898	-0.0017825	0.0430454	0.0281393	0.0187438	-0.0305377	-0.0166637	0.00625956	-0.00474903	-0.0104392	0.00429888	-0.0181343	-0.00106261	-0.000495492	-0.00787284	-0.00863856	0.00917561	-0.00835509	0.0116813	-0.00101785	-0.00100451	-0.0050708	-0.00444306	0.00732885	-0.00925333	-0.00535071	-0.00637467	-0.0136378	0.00408804	-0.00158716
Goniatites crenistria	Korn (1988, text-fig. 33C)	0.55183	-0.833938	0.639134	0.427167	-0.0122432	-0.0331074	0.214207	-0.090936	0.183928	0.0367466	0.0264403	-0.131949	-0.0519409	0.0502736	0.0225353	0.0230018	-0.0196057	-0.0984784	0.0190881	-0.00436887	0.0469639	0.0196516	0.0160062	-0.0389312	-0.00413984	0.00219219	-0.00481851	-0.0066582	-0.000255802	-0.00607922	-0.00340386	-0.000116824	-0.0162466	-0.0106092	0.0102737	-0.0154732	0.0170651	-0.00714887	-0.00276849	-0.00586319	-0.00181159	0.00774662	-0.0087812	-0.00173194	-0.00795007	-0.00775834	0.00335821	-0.00320602
Goniatites crenistria	Korn (1988, text-fig. 33D)	0.676294	-0.736631	0.521019	0.477281	-0.0106021	-0.11992	0.214815	-0.0183214	0.188604	0.144861	0.0963028	-0.125391	-0.0950146	0.0169584	-0.00199851	-0.0113149	0.0576261	-0.0904274	0.0112423	0.00724021	0.00979339	0.036173	0.0424562	-0.0112395	0.00317057	0.00179681	0.0093342	-0.0181894	-0.00223255	0.000824325	-0.00460366	-0.0127012	0.00823623	-0.0195862	0.00999309	0.00395063	0.00289671	0.00629325	0.00605345	-0.00272383	0.00337185	0.00109018	0.00473813	-0.0146952	-0.00332586	0.00194909	-0.00162787	-0.00288504
Goniatites crenistria	Korn (1988, text-fig. 33E)	0.56184	-0.827235	0.645524	0.435255	-0.0500139	-0.12256	0.209541	-0.0832827	0.235523	0.050531	0.0302108	-0.140226	-0.0670209	0.0651535	0.00225486	0.00245286	-0.0178569	-0.103853	0.0249312	-0.00424703	0.027338	0.0121744	0.0142081	-0.0316691	0.010621	-0.00632182	-0.00787997	-0.0135136	-0.000198903	0.00612289	-0.0152487	-0.000384916	-0.0194002	-0.0145502	0.0116719	-0.0160135	0.00755031	-0.00270943	-0.00090722	-0.00302483	0.000855695	-0.00293454	-0.0155217	-0.00401937	0.00067561	0.000746788	0.00148138	-0.00139425
Goniatites crenistria	Korn (1988, text-fig. 34A)	0.396598	-0.887448	0.912767	0.408475	0.103257	0.11478	0.133727	-0.121668	0.114739	-0.036028	-0.0325017	-0.104156	-0.0056455	0.044525	0.0709257	0.00839743	-0.0333077	-0.0202879	0.0239173	-0.0420094	0.0452324	-0.0316364	-0.012156	-0.0173256	0.00351279	0.0188223	0.0131227	-0.00264075	-0.0036097	-0.000852599	0.00462894	-0.0212509	0.00197039	-0.0029009	-0.0116113	-0.00853752	-0.00534383	-0.0102805	0.00558484	-0.00326535	0.0165615	-0.000974612	-0.00111577	-0.0117525	-0.00470345	0.0119909	-0.00893781	-0.00308425
Goniatites crenistria	Korn (1988, text-fig. 34B)	0.535678	-0.844379	0.577158	0.373476	0.0376784	0.0791176	0.145281	-0.0648674	0.111811	0.0147249	0.0228674	-0.162404	-0.0196465	0.0227485	0.00736996	0.00677541	-0.019629	-0.0625294	0.0306844	-0.00890464	0.0545406	0.0146543	0.0098602	-0.0328092	-0.0168312	0.0151392	-0.0131428	-0.0149648	-0.00469983	-0.0263481	0.00139752	-9.09514e-05	0.00806992	0.00340465	0.00498668	-0.010647	0.00297782	-0.00221337	-0.00650867	-0.0104957	-5.72145e-05	0.0008271	-0.00940001	0.000308973	-0.0082798	-0.00472953	0.00223754	-0.00343056
Goniatites crenistria	Korn (1988, text-fig. 34C)	0.3828	-0.923785	0.758966	0.308763	0.0577136	0.0579622	0.142135	-0.146679	0.13613	-0.0562398	-0.0643122	-0.152552	-2.50053e-05	0.0573236	0.0559347	-0.000713858	-0.0686306	-0.0282668	0.0145331	-0.0386704	0.0439022	-0.0437802	-0.0250292	-0.0239229	0.00710796	0.0169405	-0.00834005	0.00354155	-0.0157931	0.000103573	-0.000646456	-0.0179546	-0.000169312	0.0007576	-0.0154279	-0.00549748	-0.0102796	-0.0105584	-0.00435368	0.00470039	0.00753051	-0.00296417	0.00010608	0.00126069	0.000129798	0.0120779	-0.0127289	0.00046196
Goniatites crenistria	Korn (1988, text-fig. 34D)	0.560393	-0.828121	0.668063	0.461444	-0.000437481	-0.00480918	0.199989	-0.0771082	0.193495	0.0440726	0.0323908	-0.137225	-0.0580683	0.0528719	0.00772611	0.00955832	-0.0134202	-0.0903766	0.0373277	-0.00527913	0.0525922	0.0253098	0.0230152	-0.0462193	-0.0085559	0.00451815	-0.00166465	-0.00287536	0.000508662	-0.00778969	0.00262383	0.000272639	-0.0100489	-0.00799991	0.0132412	-0.0158476	0.017553	-0.00555608	-0.00190631	-0.00707571	-0.00229526	0.00656441	-0.00623822	-0.00206375	-0.00565597	-0.007174	0.00537751	-0.00368654
Goniatites crenistria	Korn (1988, text-fig. 34E)	0.534024	-0.845463	0.632872	0.397213	-0.0111748	-0.0217797	0.199766	-0.0952349	0.189327	0.0214005	0.0166498	-0.149382	-0.0467572	0.0594389	0.0177721	0.013812	-0.0323515	-0.0927837	0.0223635	-0.00741911	0.052145	0.0119195	0.00970949	-0.0430286	-0.00518626	0.00540295	-0.00818802	-0.00839774	-0.00145171	-0.00717091	-0.00312329	0.000702909	-0.0158941	-0.00566366	0.00624081	-0.0176526	0.0134936	-0.0107187	-0.00423831	-0.00554779	0.000908556	0.00690623	-0.0106191	0.00131535	-0.00909565	-0.00449342	0.00234639	-0.00514675
Goniatites crenistria	Korn & Ebbighausen (2008, text-fig. 18C)	0.661458	-0.749978	0.645643	0.567745	-0.0239018	-0.191639	0.379936	-0.0480408	0.283717	0.193283	0.0990051	-0.146382	-0.129047	0.0329342	0.00316456	0.0115262	0.0407267	-0.0793007	0.0522682	0.0266935	0.00202814	0.00553048	0.059811	-0.0240837	0.0386099	0.0138549	-6.41211e-05	0.000924096	-0.0182116	0.0102063	-0.0029521	-0.00475016	0.00529872	-0.0243811	0.0258858	0.00541273	0.00285088	0.0035569	0.0115101	-0.00811629	0.0115873	0.00144141	0.000151848	-0.00492575	0.000468651	-0.000818768	0.00432512	0.00423229
Goniatites deceptus	Korn & Titus (2011, text-fig. 48D)	0.350532	-0.84895	0.923953	0.3825	0.161473	0.16084	0.208214	-0.208257	0.0892446	-0.0374004	-0.0398395	-0.0954011	0.000318101	0.072432	0.102647	-0.00017919	-0.0336617	-0.0137414	0.0242515	-0.0588511	0.0344242	-0.0349568	-0.00891765	-0.00887175	0.012942	0.0305252	0.0264044	-0.0109766	-0.00934792	4.51661e-05	-0.000144962	-0.0318059	0.000684591	-0.00163799	0.00276023	0.00107032	-0.00588478	-0.00565901	0.00596675	-0.0059116	0.0159452	-0.00696126	-0.00600886	-0.0142147	0.000288326	0.0175083	-0.00475871	-2.77688e-05
Goniatites deceptus	Korn & Titus (2011, text-fig. 48E)	0.665446	-0.746419	0.550782	0.485223	-0.0205842	-0.183247	0.225203	-0.0291103	0.236594	0.167181	0.0891718	-0.129307	-0.0940514	0.0216826	-0.0136409	-0.0575836	0.0384244	-0.0699295	0.0138486	0.00704797	0.00178306	0.00499689	0.0495086	-0.0186655	0.0329261	0.0134229	0.0100368	-0.0274005	-0.021348	0.0105318	-0.00952252	-0.0184132	0.00733161	-0.0260299	0.0126246	0.00312966	0.00386267	0.00600154	0.00781232	-0.00562752	0.00228467	0.000449695	0.00154555	-0.0139002	0.0011263	-0.00088474	-0.00730274	-0.00861203
Goniatites deceptus	Korn & Titus (2011, text-fig. 48F)	0.592646	-0.80546	0.64315	0.471485	-0.034821	-0.118446	0.261666	-0.0839116	0.273038	0.0972225	0.0491626	-0.142921	-0.0914175	0.06043	-0.011648	-0.0169222	0.00462293	-0.0942044	0.0392543	0.000806267	0.0277298	0.0228899	0.0309732	-0.0403581	0.0204916	-0.00565634	-0.00552057	-0.0181963	-0.00502567	0.0123274	-0.0112773	-0.00498945	-0.0106578	-0.0171603	0.0225552	-0.0140749	0.0112044	0.000906352	-0.000479896	-0.00709496	0.00429836	-0.00505815	-0.0126948	-0.0112457	0.000669876	0.00362763	0.0030508	-0.000525257
Goniatites deceptus	Korn & Titus (2011, text-fig. 50E)	0.735195	-0.677852	0.443772	0.478827	0.0122893	-0.196727	0.218349	0.0186303	0.160447	0.197403	0.110916	-0.0882186	-0.102106	-0.0128829	0.00739947	-0.043391	0.0878566	-0.0616027	0.00504685	0.00773852	-0.00268125	0.0156583	0.0351237	0.00852024	0.00483466	0.0087515	0.00996833	-0.00505535	-0.00674328	-0.0018777	0.0083493	-0.0271646	0.0192728	-0.00932665	0.00310629	0.00495198	0.00128915	-0.00322055	-0.00289124	-9.7102e-05	0.00270547	0.00601383	0.0133144	-0.00547301	-0.00678803	-0.0028812	0.00306451	-0.00512206
Goniatites deceptus	Korn & Titus (2011, text-fig. 50F)	0.683309	-0.730121	0.536028	0.498566	-0.0064095	-0.179525	0.258712	-0.0220519	0.23646	0.20369	0.111917	-0.13701	-0.119618	0.00996806	-0.00590955	-0.0443778	0.060602	-0.0773242	0.023399	0.0157547	0.00326051	0.0259818	0.0569438	-0.0117666	0.0171579	0.0108647	0.00866381	-0.0166783	-0.00975983	0.00199931	-0.00507588	-0.0244006	0.00749502	-0.0128667	0.0182779	0.0117075	-0.000325802	-0.00186259	0.00288409	-0.00338181	0.0121065	0.00660543	0.01048	-0.0206989	-0.00867351	0.00254744	-0.00147811	-0.000692982
Goniatites deceptus	Korn & Titus (2011, text-fig. 50G)	0.706823	-0.707361	0.528364	0.521833	-0.00157091	-0.237284	0.26067	-0.00243476	0.21585	0.212863	0.0969551	-0.0997523	-0.110928	0.00138763	-0.000262336	-0.04098	0.0716123	-0.0733016	0.0108367	0.0102591	0.000404203	0.0114727	0.0454715	-0.00103205	0.0152361	0.0149851	0.0106707	-0.0113676	-0.00648757	0.000107658	-0.000926225	-0.0296033	0.0101982	-0.0104211	0.010821	0.0100051	-0.000148643	-0.00976611	0.00185169	-9.6345e-05	0.01086	0.0103752	0.0137081	-0.0147854	-0.00855264	0.000175271	-0.000327173	-0.00356266
Goniatites eganensis	Korn & Titus (2011, text-fig. 53B)	0.65907	-0.752071	0.508739	0.449727	-0.0256795	-0.174436	0.196071	-0.0215948	0.221827	0.143894	0.0809451	-0.119246	-0.0903942	0.0270197	-0.0149944	-0.0575204	0.0397276	-0.0854113	0.000756114	0.000881298	0.00641423	0.0138246	0.0376415	-0.0148213	0.0214868	0.00690252	0.00816379	-0.0210164	-0.0122481	0.00792347	-0.0155146	-0.0267433	0.00400212	-0.0249095	0.00681611	0.000727825	0.00365831	0.00410857	0.00243128	-0.000821941	0.00325402	0.000327303	0.00123265	-0.0150658	-0.00107478	0.00109057	-0.00685434	-0.00760618
Goniatites eganensis	Korn & Titus (2011, text-fig. 53C)	0.691209	-0.722642	0.437084	0.422663	-0.00405879	-0.119486	0.154568	-0.00524766	0.160901	0.142865	0.100615	-0.112452	-0.0864526	0.00628627	-0.00463776	-0.0537976	0.0659149	-0.0805185	-0.00546089	-0.0041172	0.00395587	0.0338254	0.0338517	-0.0038358	0.000228611	-0.000127004	0.0118193	-0.0157446	-0.00266109	0.00039794	-0.00468169	-0.0290069	0.012182	-0.0178626	0.000783535	0.00063829	0.00170146	0.00819548	-0.00222989	0.000302132	-0.00187909	-0.00123164	0.00756385	-0.0115758	-0.000766383	0.000133816	-0.00231731	-0.00946565
Goniatites eganensis	Korn & Titus (2011, text-fig. 53D)	0.677007	-0.735976	0.479882	0.440473	-0.0164529	-0.180969	0.223473	-0.0183386	0.213066	0.163223	0.0985167	-0.127423	-0.0890797	0.0162383	-0.0110092	-0.0639874	0.0413719	-0.0649416	0.00735647	0.0048288	-0.00052052	-0.002168	0.0485454	-0.0126656	0.0317228	0.0164235	0.0111265	-0.0206147	-0.0263801	0.00992167	-0.00943754	-0.0263693	0.0121286	-0.0295954	0.00767229	0.00302037	0.00443348	0.00881223	0.00521312	-0.00191252	-0.00323472	-0.000798625	0.00482595	-0.0153234	0.00273174	-0.00174669	-0.00455296	-0.00810171
Goniatites eganensis	Korn & Titus (2011, text-fig. 54C)	0.582242	-0.812965	0.629879	0.458095	0.000869032	0.00184666	0.237456	-0.077361	0.209953	0.0640259	0.052333	-0.166382	-0.0769879	0.0584969	0.00737712	0.0105312	-0.00268044	-0.0905408	0.0531322	-0.000558148	0.0484032	0.0325059	0.0259188	-0.0365977	-0.00518126	0.00182544	-0.00468961	-0.0134356	-0.000500478	0.00168672	0.00311367	0.00127859	-0.00970668	-0.0120903	0.0201069	-0.0153819	0.0199305	-0.00115466	-0.000235647	-0.00838246	-0.00490744	0.00760957	-0.00934899	-0.00612683	-0.00222614	-0.00567947	0.0110711	-0.00412775
Goniatites eganensis	Korn & Titus (2011, text-fig. 54D)	0.567605	-0.823301	0.594958	0.410478	-0.0592826	-0.163107	0.20671	-0.0806798	0.241989	0.0627003	0.0318241	-0.129448	-0.0631643	0.0529105	-0.0263331	-0.0292366	-0.00858944	-0.0822762	0.0128913	-0.00178032	0.000176402	0.0002434	0.0194749	-0.0376954	0.029636	-0.0146909	-0.00874783	-0.0154789	-0.00410918	0.0237239	-0.0238789	-0.00318504	-0.0250018	-0.0237808	0.00769672	-0.00803289	0.0112847	-0.0019236	-0.00206254	-0.00607955	-0.00178636	0.00301013	-0.0111214	-0.00426006	-0.00235059	-0.00413095	-0.00837531	0.00588786
Goniatites eganensis	Korn & Titus (2011, text-fig. 57E)	0.557364	-0.830268	0.66199	0.44421	-0.00213707	-0.010005	0.183723	-0.079005	0.230503	0.0504219	0.0387937	-0.186285	-0.0678741	0.0632384	-0.0149068	-0.0150284	-0.0120348	-0.0742551	0.0545081	-0.0108026	0.0419345	0.0191605	0.019704	-0.0470732	0.00927628	-0.00587109	-0.010789	-0.0164795	-0.00113893	0.0173781	-0.00189135	-0.000283625	-0.0182294	-0.0141293	0.0133996	-0.0190836	0.0240748	-0.00798239	-0.00515357	-0.0113858	-0.00352114	0.0110209	-0.0126317	-0.00323981	-0.00378206	-0.00495895	0.00425091	-0.00359595
Goniatites eganensis	Korn & Titus (2011, text-fig. 58C)	0.615078	-0.788447	0.570743	0.450016	-0.0617426	-0.254306	0.291443	-0.0709859	0.314839	0.142231	0.0736471	-0.162049	-0.1111	0.0573075	-0.0163225	-0.030761	0.0175673	-0.0937643	-0.000208672	0.000156797	0.00518235	0.00620833	0.0556878	-0.0488667	0.0277067	-0.001796	-0.000874685	-0.0143612	-0.00597944	0.00856574	-0.024427	-0.0171689	-0.00330893	-0.0102682	0.0159188	-0.00474476	-0.0120229	-0.00459839	0.00251352	-0.00681539	0.0155515	-0.00929211	-0.00992619	-0.0170863	-0.00129802	0.0097851	-0.00495343	-0.000546608
Goniatites evelinae	Klug et al. (2006, text-fig. 26D)	0.730212	-0.683218	0.467852	0.498304	0.00932441	-0.18014	0.231212	0.0168441	0.157093	0.186866	0.123678	-0.10231	-0.0983158	-0.0106166	0.00342149	-0.0214205	0.0790443	-0.0587503	0.0129025	0.0186495	-0.000894931	0.0066014	0.0398296	0.00781912	0.0094118	0.0144468	0.012378	-0.00712807	-0.0157243	-0.00349726	0.00410125	-0.0166897	0.0260069	-0.0148639	0.00430092	0.00728449	-0.000624671	0.00311278	0.00540955	0.0022755	-6.18146e-05	0.00025581	0.0090739	-0.00431871	-0.00168523	-0.000740393	0.00299945	-0.00665464
Goniatites gerberi	Klug et al. (2006, text-fig. 24F)	0.659193	-0.751971	0.543865	0.474821	-0.0179069	-0.130081	0.262282	-0.0353852	0.21039	0.139343	0.0882306	-0.133271	-0.0948588	0.0262563	-0.00427673	-0.0161241	0.0406558	-0.0842036	0.0364417	0.0174226	0.00720783	0.0168128	0.0396737	-0.0164941	0.0196716	0.00651473	0.00564073	-0.0173559	-0.0143079	0.00853458	-0.00668284	-0.0109703	0.00565428	-0.0304132	0.0228393	0.00396049	0.00688301	0.0086206	0.00354235	-0.00254957	-0.000675481	5.54415e-05	0.0005886	-0.013483	0.00183159	-0.00201567	-0.00144754	-0.0015555
Goniatites gerberi	unpubished	0.703023	-0.711145	0.513562	0.502261	-0.00291003	-0.141028	0.262426	-0.0050693	0.186015	0.177348	0.114237	-0.120243	-0.099002	0.00342916	-0.000636138	-0.0154084	0.0629923	-0.0679552	0.0264618	0.0241352	0.000882347	0.0153492	0.0443331	-0.00235847	0.0170115	0.0154353	0.0124876	-0.0144849	-0.0178065	0.00121554	-0.00100866	-0.0133564	0.0204885	-0.0232751	0.0161768	0.0137486	0.000801883	0.00990609	0.00524206	-0.000618081	-9.80567e-06	0.000210905	0.00827158	-0.010583	0.00215677	-0.000186689	-2.57354e-05	-0.00334696
Goniatites gerberi	unpubished	0.690916	-0.722912	0.493136	0.465494	-0.00475981	-0.0807219	0.201494	-0.0109979	0.170266	0.146542	0.100102	-0.11707	-0.0828265	0.00874449	-0.00346198	-0.0382674	0.056551	-0.0726934	0.011084	0.00846734	0.00552269	0.0368229	0.0455538	-0.00712511	0.00725302	0.00516422	0.0176971	-0.0253258	-0.00917879	0.00197199	-0.00218894	-0.0101151	0.0136687	-0.02165	0.00893296	0.00560945	0.00422307	0.0161956	0.00431698	-0.00129521	-0.00422651	-0.00219544	0.00944628	-0.0173453	0.00341669	-0.00102626	-0.00118328	-0.00394221
Goniatites globostriatus	Korn & Ebbighausen (2008, text-fig. 25)	0.648734	-0.760962	0.670182	0.565643	-0.0295864	-0.174076	0.366015	-0.0608018	0.273725	0.164183	0.0793597	-0.133062	-0.10326	0.0354913	0.00246075	0.0064302	0.0257819	-0.0650037	0.057837	0.0226328	-0.0043485	-0.00756856	0.0491161	-0.0263581	0.0523671	0.0111861	0.00172608	-0.00833562	-0.0244499	0.0193602	0.00560443	0.00746269	0.00136484	-0.0350829	0.0188227	0.000562219	0.0111869	0.0100339	0.00764248	-0.00809474	0.00437649	4.70228e-05	-0.000946497	-0.0074392	0.00372594	-0.00628138	0.00471194	0.0030268
Goniatites hudsoni	Korn & Tilsley (2006, text-fig. 24B)	0.641721	-0.766935	0.488554	0.406652	-0.00408024	-0.0219307	0.231367	-0.0424093	0.152943	0.087088	0.0802994	-0.141373	-0.0695693	0.0260616	0.00137095	0.00395049	0.032485	-0.0920532	0.024056	0.00825549	0.0246519	0.0413508	0.0349804	-0.0208479	-0.010881	-0.00173626	0.00284686	-0.0184129	0.00537676	-0.00464547	-0.00454379	-0.00490964	-0.000207208	-0.0187415	0.0126873	-0.0003319	0.0121906	0.00979911	0.00612176	-0.00787739	-0.0108683	0.00219249	-0.00255803	-0.0117757	0.00594333	-0.0107778	0.000574381	0.000309708
Goniatites hudsoni	Korn & Tilsley (2006, text-fig. 24C)	0.595505	-0.803347	0.557094	0.41544	-0.0254867	-0.0816922	0.243358	-0.0721289	0.203462	0.071574	0.0463039	-0.127335	-0.0610378	0.0418194	-0.00666657	-0.00989387	0.00350718	-0.0862002	0.0232914	0.00143319	0.018884	0.0150512	0.0210439	-0.0246599	0.0220342	-0.00571366	-0.0069556	-0.0288635	-0.00715093	0.0180659	-0.00995952	-0.00406331	-0.018217	-0.0297106	0.0134986	-0.00786912	0.0228243	0.00193836	0.00116421	-0.00964871	-0.00668628	0.00756236	-0.00920973	-0.0086049	-0.0019745	-0.00962626	-0.00264877	0.000435261
Goniatites moorei	Korn & Tilsley (2006, text-fig. 26D)	0.518051	-0.855186	0.754527	0.447675	-0.0704351	-0.126785	0.319829	-0.172572	0.282436	0.012879	0.00632086	-0.130808	-0.0486988	0.0760761	0.0201076	0.0141283	-0.0301934	-0.0620329	0.0468121	-0.0236984	-0.00653443	-0.00125393	0.00484849	-0.0457419	0.0342068	-0.0448721	-0.00571787	-0.00329586	0.013698	0.0335212	0.00409585	-0.00212295	-0.0416932	-0.00671869	0.00394134	-0.0268659	0.0142635	-0.0167574	-0.00240064	-0.00125463	-7.12444e-05	0.000147046	-0.00623298	0.00241234	-0.0102986	-0.00271513	0.0016014	-0.00873252
Goniatites moorei	Korn & Tilsley (2006, text-fig. 26E)	0.517534	-0.855658	0.758338	0.460278	-0.00316141	-0.0102644	0.299231	-0.158186	0.255402	0.0188311	0.0101172	-0.147187	-0.0656992	0.0902308	0.0366618	0.0260184	-0.0336004	-0.0798991	0.0460866	-0.0210056	0.0537974	0.00769348	0.00689757	-0.0528107	0.00682015	-0.00843475	-0.000420998	-4.95549e-05	0.00544624	0.0168904	0.0137603	-0.00543123	-0.0239054	-0.0057943	0.00482776	-0.0236622	0.0218343	-0.0223607	-0.00369645	-0.0026659	0.00219345	0.0104732	-0.00357436	0.000722847	-0.0031976	-0.00153193	0.002865	-0.0112867
Goniatites moorei	Korn & Tilsley (2006, text-fig. 26F)	0.276243	-0.961062	0.728311	0.204522	-0.189053	-0.120183	0.140527	-0.231474	0.211609	-0.187114	-0.109033	-0.119016	0.0320261	0.0690224	-0.0293871	0.0144853	-0.055189	0.00911034	-0.00628826	-0.033033	-0.00409788	0.0338729	-0.0399334	-0.00306132	-0.0538006	-0.0229425	-0.00684547	0.0190007	0.0216049	-0.0258379	0.0173923	0.0136426	0.0195403	0.028452	-0.0120372	0.00858241	-0.00659927	0.00200253	0.00396089	0.00879484	0.000111177	-0.00338865	0.0121243	-0.0013346	0.0125721	0.0032393	0.000969274	-0.00574406
Goniatites rodioni	Klug et al. (2006, text-fig. 21F)	0.680247	-0.732982	0.406145	0.375194	-0.0107416	-0.138574	0.254667	-0.0196931	0.152534	0.121192	0.0815135	-0.103272	-0.0906883	0.0140116	-0.00235969	-0.0158155	0.064165	-0.0946063	-0.000934898	-0.000618798	0.00669911	0.0289123	0.0299366	-0.00721728	-0.00690948	-0.00389799	0.00728313	-0.0126774	-0.00254333	0.000817361	-0.00702416	-0.0220728	0.00995937	-0.0209751	0.00403316	0.0018631	0.00181439	0.00447949	-0.00170978	0.000758959	-0.00517866	-0.00198683	0.00440247	-0.0115211	-0.00193935	0.000910118	-0.00284766	-0.00541055
Goniatites rodioni	unpubished	0.737285	-0.675578	0.37168	0.402879	0.0134566	-0.150187	0.252128	0.0204257	0.122251	0.159403	0.109688	-0.085347	-0.0931029	-0.0163957	0.00158477	-0.0121507	0.0966192	-0.0613657	-0.0039387	-0.00663387	-0.0069214	0.0258911	0.0319324	0.00821013	-0.0025925	-0.00511235	0.0117489	-0.00670438	-0.00441986	-0.00151506	0.00745204	-0.0219992	0.0220687	-0.00904307	0.000794251	0.00184467	-0.00165323	0.00348362	-0.00131627	-0.000982428	-0.00137481	-0.00414562	0.0108689	-0.0035582	-0.00325338	-0.00190405	0.00267789	-0.00506877
Goniatites sphaericus	Korn (1988, text-fig. 38A)	0.410288	-0.911653	0.822381	0.358733	-0.141965	-0.155076	0.249385	-0.228801	0.338018	-0.110222	-0.055108	-0.164351	-0.0123214	0.128787	0.00173138	-0.000320879	-0.0765097	-0.0436567	0.0239346	-0.0439684	0.00869571	-0.00657597	-0.0390351	-0.0523228	-0.00784131	-0.0388531	-0.00360371	0.00138842	0.0157356	0.00329745	-0.0014579	0.0058322	-0.0102012	0.0137898	-0.0189237	-0.0128579	-0.00021508	-0.000655566	-0.0124026	0.0077205	-0.0164284	0.00166367	0.00118293	0.00782249	0.000901513	-0.00342622	-0.00245052	-0.000765022
Goniatites sphaericus	Korn (1988, text-fig. 38B)	0.454815	-0.890562	0.720779	0.372417	-0.0410113	-0.054634	0.184281	-0.128387	0.240971	-0.0393047	-0.023802	-0.158436	-0.0282157	0.0904493	0.00230335	0.000854212	-0.066386	-0.0652936	0.0278758	-0.026269	0.0404189	-0.0136047	-0.0133651	-0.045497	0.00193877	-0.0116197	-0.0131846	-0.00269691	0.00800595	0.00559214	-0.00389138	0.00584423	-0.020881	0.0109209	-0.0115061	-0.0236833	-0.000282751	-0.018933	-0.00637142	-0.00112496	0.00262071	0.00114382	-0.00585948	0.0115794	-0.00264922	0.00199916	-0.0035299	-0.00488205
Goniatites stenumbilicatus	Klug et al. (2006, text-fig. 28B)	0.748496	-0.663136	0.487372	0.552108	0.0483221	-0.406779	0.406381	0.0509099	0.21569	0.310459	0.141258	-0.0967136	-0.0765741	-0.0184901	0.00980042	-0.0394096	0.029693	-0.0155002	-0.00324099	-0.00561193	0.0226036	-0.0608167	0.0584526	0.0223592	0.0235782	0.0606752	0.0315236	-0.0114829	-0.0206214	-0.0103128	0.0107839	-0.0201791	0.0158211	-0.00428543	1.1202e-05	-0.000150726	0.00294123	-0.00381538	0.0114243	0.00837262	-0.00161939	-0.01079	0.0212113	-0.00251863	0.0187234	0.0159676	0.00452821	-0.00480359
Goniatites stenumbilicatus	unpubished	0.734628	-0.678431	0.504115	0.538664	0.024833	-0.4443	0.407415	0.0292368	0.246156	0.295336	0.142086	-0.115864	-0.0707338	-0.0068423	0.0059915	-0.039519	0.0197456	-0.0138393	-0.00694486	-0.00944491	0.0136961	-0.0736169	0.0565242	0.0117411	0.0357549	0.0549083	0.0325257	-0.0192756	-0.0201504	-0.00405207	0.00623404	-0.0225157	0.0123629	-0.0073502	-0.00149319	-0.00367625	0.00222771	-0.00359336	0.0111484	0.00429849	-0.0075214	-0.013978	0.0195612	-0.00813784	0.0270444	0.00930824	0.0043072	-0.0100492
Gourarites hagaraswad	Bockwinkel et al. (2010, text-fig. 40D)	0.737275	-0.675593	0.396775	0.432997	0.0014943	-0.0217544	0.167644	0.0155466	0.0861449	0.111359	0.10737	-0.0824184	-0.0358665	-0.00590337	0.00427504	-0.0238994	0.0616186	-0.0396336	-0.00593195	-0.00919032	-0.0073741	0.0282382	0.015625	0.00439203	0.002086	0.00412626	0.0439209	-0.0229801	-0.00589355	-0.00199482	0.00216514	-0.00564521	0.0249037	-0.01065	-0.000750538	-0.00208482	-0.00949559	0.0211105	-0.00170764	-0.000582607	-0.00567692	-0.0168116	0.0230226	-0.00743726	0.0149304	0.00821118	0.000458362	-0.000266796
Gourarites mustari	Bockwinkel et al. (2010, text-fig. 44F)	0.586537	-0.809889	0.619414	0.454371	0.0201357	0.0593209	0.241256	-0.0778611	0.165689	0.0541886	0.0482094	-0.145567	-0.0501392	0.0355821	0.00498293	0.00766141	0.000365882	-0.0544176	0.0482332	0.000631985	0.0326285	0.0236848	0.0291614	-0.0403485	0.00636034	-0.0018923	-0.00640824	-0.021272	-0.00581319	0.0161821	0.0237876	0.00812125	-0.0157583	-0.0229271	0.0109746	-0.00764215	0.0338233	0.000801813	-1.94684e-05	-0.0133199	-0.014905	0.0190942	-0.00429855	-0.00331134	-0.00541226	-0.0189602	0.0126604	-0.00386892
Hammatocyclus pollex	Ebbighausen et al. (2010, text-fig. 7J)	0.768777	-0.639517	0.305332	0.368329	0.00921538	-0.0488248	0.10293	0.0194686	0.0808485	0.144303	0.142488	-0.0791541	-0.061662	-0.0236477	0.0268198	-0.067925	0.0907444	-0.0306941	-0.00787351	-0.0234493	-0.0230436	0.0377532	0.0177656	0.0113775	-0.0019022	-0.0128882	0.0280724	-0.00350518	0.00446317	0.00413355	0.0195629	-0.0217887	0.0155851	0.000702436	-0.000121946	-0.00364321	-0.00991301	0.00757047	-0.00714627	-0.00955206	0.0023263	-0.0106595	0.0144754	0.00297577	0.00370898	0.00728781	0.00259697	-0.00124316
Hibernicoceras artilobatum	Korn & Ebbighausen (2008, text-fig. 44E)	0.670181	-0.742185	0.568022	0.509095	-0.0130269	-0.118079	0.252517	-0.0271007	0.219717	0.159287	0.0807484	-0.111996	-0.103589	0.0226401	-0.0067285	-0.0321544	0.0513418	-0.0893907	0.0324035	0.0184051	0.0135612	0.0411393	0.0417028	-0.0138463	0.00876191	0.00419999	0.00753621	-0.0173232	-0.00316647	0.00136788	-0.006603	-0.0149922	0.00496476	-0.0149301	0.02007	0.00620571	0.00386181	0.00697619	0.00373911	-0.00209222	0.00817716	0.00167362	0.00414807	-0.0207882	-0.00515353	0.00390273	0.00107935	0.000907549
Hibernicoceras carraunense	Korn & Ebbighausen (2008, text-fig. 40F)	0.67019	-0.742084	0.708016	0.634179	-0.0255248	-0.224973	0.290403	-0.0307989	0.288865	0.207382	0.0976975	-0.135832	-0.106697	0.0242934	-0.00104011	-0.00500461	0.0335818	-0.0593379	0.0318838	0.0178712	-0.000903061	-0.00259614	0.0620735	-0.0206161	0.0479417	0.0207265	0.00462688	-0.00979263	-0.0216225	0.0103559	-0.00569673	-0.0115116	0.00509569	-0.0168718	0.0289014	0.00862288	0.00167049	0.00240312	0.00995223	-0.00556168	0.00978081	0.00218996	0.00242738	-0.0126931	0.0026715	-0.00225428	0.00257876	0.00322149
Hibernicoceras touissitense	Korn & Ebbighausen (2008, text-fig. 42F)	0.640526	-0.750056	0.759317	0.650643	-0.033118	-0.204322	0.354107	-0.0540667	0.324091	0.197288	0.0826559	-0.134704	-0.115927	0.038332	-0.000405936	-0.000705137	0.0223745	-0.0546999	0.0574849	0.0241962	0.000823673	0.00168454	0.0533122	-0.0265351	0.0529997	0.012352	0.00350838	-0.0141939	-0.0232647	0.0172753	0.000244657	0.00103652	0.000899257	-0.0130944	0.0389558	0.00305594	0.00231674	0.0022243	0.00511993	-0.0044824	0.0104011	-0.000824014	-0.000876393	-0.00810527	0.00170154	-0.00253511	0.00910902	0.00665309
Hypergoniatites fusiger	Klug et al. (2006, text-fig. 30D)	0.632161	-0.774836	0.558619	0.456473	-0.0301981	-0.144628	0.32535	-0.066129	0.222705	0.11554	0.0518928	-0.099028	-0.0971635	0.0424016	0.000825506	0.00176991	0.0324386	-0.115109	0.0256247	0.00772925	0.0222498	0.0312383	0.0373522	-0.0258734	0.00341712	0.000384312	0.000545796	-0.00755232	0.000720722	-0.000667023	-0.00900872	-0.00853497	-0.00269082	-0.0212888	0.0170772	-0.00209304	0.00353205	0.00221799	0.00408573	-0.00662518	0.00607734	-0.00211926	-0.00327427	-0.00970009	-0.00135281	0.00409825	0.00049898	-3.22854e-05
Itimaites parabolicus	Klug et al. (2006, text-fig. 10B)	0.701134	-0.713	0.683131	0.674318	-0.00556759	-0.364652	0.357228	-0.00502759	0.334188	0.31821	0.202458	-0.211527	-0.0945152	0.00303834	-0.0013498	-0.0346235	-0.00431718	0.0048793	0.0337038	0.0313287	-0.00305755	-0.0650052	0.08419	-0.00393045	0.0638916	0.0569054	0.0207038	-0.0228901	-0.0303111	0.00199601	-0.000992551	-0.0188639	0.00481773	-0.00553931	0.013563	0.0120084	0.000546761	0.00504448	0.0298396	-0.00224068	-0.00888272	-0.00755857	0.00820521	-0.00960587	0.0304195	-0.00298651	-0.00105239	-0.0112869
Lusitanites circularis	Korn & Ebbighausen (2008, text-fig. 67B)	0.535501	-0.844478	0.764945	0.480075	0.0458839	0.097786	0.294613	-0.142066	0.213253	0.0266814	0.0194016	-0.15924	-0.0766833	0.0928942	0.0286909	0.0228208	-0.0221434	-0.0672745	0.070679	-0.0242941	0.06614	0.0167871	0.0137125	-0.055964	-0.0180601	0.017043	0.00601238	0.00639711	0.00128361	0.00688889	0.0223832	-0.00506132	-0.013337	-0.00516294	0.0104572	-0.0278559	0.0170505	-0.0125261	-0.00046774	-0.000517506	0.00147507	0.0221325	0.00684791	-0.000589924	-0.0133007	-0.00723545	0.00714099	-0.013973
Lusitanoceras zirari	Korn & Ebbighausen (2008, text-fig. 50F)	0.495762	-0.712844	0.822281	0.569068	-0.0669557	-0.177923	0.363384	-0.135895	0.339033	0.0860065	0.0298711	-0.119124	-0.0968037	0.0845088	0.0320701	0.0364447	-0.00731486	-0.0673112	0.0613457	-0.00681644	0.00167155	0.000995855	0.0295483	-0.0545848	0.0432369	-0.021735	0.013273	0.0262287	-0.00233495	0.0175957	0.00840078	0.00120802	-0.00974487	-0.00891091	0.0127611	-0.0141432	0.00911297	-0.00203651	-0.000819896	-0.00371592	0.00562615	-0.0133409	0.000552135	-5.89566e-06	0.00163426	0.0027296	0.00677959	-0.00434228
Muensteroceras fabrei	Ebbighausen et al. (2010, text-fig. 21E)	0.548747	-0.83593	0.672078	0.44814	0.0703103	0.159063	0.265729	-0.114445	0.151141	0.0287748	0.0391361	-0.21049	-0.068244	0.0689227	0.0408061	0.0406442	-0.0121129	-0.0605246	0.0662226	-0.0158106	0.0613521	0.024251	0.0201966	-0.05252	-0.0311783	0.0216023	0.00313603	0.00455221	-0.000122394	-0.0120482	0.0209951	-0.00105421	-0.000958273	-0.000606179	0.013463	-0.0219214	0.0103739	-0.00466649	-0.00171843	-0.00331197	-0.00267936	0.0155116	0.00247191	0.000235564	-0.012352	-0.0116911	0.0104687	-0.0115896
Neogoniatites worki	Klug et al. (2006, text-fig. 33B)	0.633621	-0.773638	0.736843	0.602275	-0.0829955	-0.415374	0.398086	-0.0809613	0.35933	0.191228	0.0768069	-0.145658	-0.112387	0.0469384	0.00498064	0.0122326	0.0242452	-0.0809839	0.0332535	0.00942952	-0.0197543	-0.0291206	0.0464745	-0.0314477	0.0407666	0.00381798	6.36992e-05	-0.00445066	0.00682682	-0.00695399	-0.00778282	-0.00752674	0.000146133	0.00145428	0.00879744	-0.00114781	-0.0223071	-0.0146175	0.00432306	-0.00685535	0.0176231	-0.0055252	-0.00547215	-0.0171134	0.00280618	-0.00689866	0.00184452	0.000918737
Paraglyphioceras celeris	Korn & Ebbighausen (2008, text-fig. 48D)	0.634013	-0.773212	0.762371	0.622108	-0.0433453	-0.213879	0.332184	-0.0673594	0.333266	0.176363	0.0823003	-0.156174	-0.117353	0.0496534	0.000149604	0.000328483	0.0197851	-0.0666491	0.0593462	0.0174505	0.000315048	0.000293439	0.0560319	-0.0384189	0.0494437	0.00459132	-0.000117374	-0.000945406	-0.0155366	0.0159557	-0.00424183	-0.00416581	-0.00156129	-0.0150557	0.0351388	-0.00411709	0.00088267	0.000645305	0.00428937	-0.00693806	0.0126334	-0.00392633	-0.00238591	-0.00709761	0.00115483	-0.00279453	0.00668713	0.0024311
Paraglyphioceras rudis	Korn & Ebbighausen (2008, text-fig. 46G)	0.671829	-0.740701	0.713211	0.647875	-0.0294262	-0.313013	0.353623	-0.0348288	0.321813	0.24089	0.114032	-0.152619	-0.109308	0.0210842	-0.00549784	-0.0269512	0.0269112	-0.044445	0.061521	0.0370703	-0.00873553	-0.0303014	0.0556758	-0.0166363	0.0538505	0.0265174	0.00406767	-0.00888205	-0.012662	0.00469912	-0.00536388	-0.0136048	0.003414	-0.00832224	0.0230748	0.00850693	-0.00256214	-0.00403273	0.014251	-0.00758464	0.00678394	0.00145332	0.00259647	-0.0101476	0.0150519	-0.00918763	-0.00129791	-0.00212628
Platygoniatites rhanemensis	Klug et al. (2006, 20% extended)	0.479868	-0.625484	0.79341	0.608688	-0.0649536	-0.231818	0.356357	-0.0947004	0.318301	0.127949	0.0391224	-0.0953085	-0.0747414	0.0452466	0.021186	0.0364125	0.00278123	-0.0248349	0.058943	0.00799409	-0.0238633	-0.0226574	0.0368642	-0.0373537	0.0675431	-0.010511	0.00370827	0.0232412	-0.00967393	0.0187623	0.00721482	0.00474792	-0.00482011	-0.00978646	0.0135627	-0.00583431	0.0115911	0.00251497	0.0024829	-0.00853197	0.00180717	-0.000879366	0.00248899	0.00299907	-0.00108234	-0.0154469	0.00666704	0.000489469
Platygoniatites rhanemensis	Klug et al. (2006, text-fig. 41E)	0.62845	-0.702143	0.747315	0.664404	-0.0418724	-0.367641	0.39832	-0.0462233	0.318992	0.22624	0.0872347	-0.124279	-0.0763043	0.0175233	0.00124986	0.00525285	0.0122915	-0.0221113	0.0416126	0.0222727	-0.0206177	-0.058269	0.0672121	-0.0240126	0.0667169	0.0274767	-0.00118316	0.00282806	-0.0114943	0.00571702	-0.000474727	-0.000510861	0.00444531	-0.0159608	0.0118969	0.00304758	0.00186575	0.00270076	0.0129217	-0.00852472	-0.00338962	-0.000342191	0.00111144	-0.00685378	0.024056	-0.0194453	-0.00185937	-0.00228815
Platygoniatites rhanemensis	Klug et al. (2006, text-fig. 41F)	0.430546	-0.63189	0.824579	0.565734	-0.0420088	-0.105547	0.299248	-0.115866	0.267588	0.0601812	0.0136759	-0.0583853	-0.0738931	0.0693519	0.0445658	0.0488162	-0.00986487	-0.0620866	0.0587515	-0.0082149	0.0137122	0.00638545	0.00631853	-0.01223	0.0411225	-0.0239665	0.0124367	0.0221223	-0.00170873	0.0246769	0.00174312	0.000477253	-0.00733817	-0.00576482	0.0100958	-0.0121344	0.0172724	-0.00535448	0.000561932	0.00210385	-0.000259281	0.000480262	0.00145135	0.000741022	0.00237949	0.00288504	0.0105368	-0.00807167
Revilloceras bellornatum	Klug et al. (2006, text-fig. 37B)	0.69027	-0.72355	0.659343	0.629983	-0.0165568	-0.347825	0.381861	-0.0174725	0.277239	0.240621	0.0851148	-0.0977023	-0.0884661	0.00840218	-0.00121959	-0.0150955	0.0346309	-0.0443056	0.0113829	0.0090923	-0.0055663	-0.0393717	0.0807376	-0.0110759	0.0476063	0.0340221	0.00206574	-0.00263558	-0.0184627	0.00343931	-0.00186434	-0.00909382	0.0129953	-0.0199966	0.0118765	0.00765938	-0.000735935	-0.00267123	0.00813517	-0.00178049	0.00402412	0.00230473	0.00534019	-0.00908513	0.016679	-0.00480847	-0.00296997	-0.0102454
Revilloceras bellornatum	unpubished	0.70478	-0.709268	0.654835	0.642272	-0.00724642	-0.350181	0.377755	-0.00515005	0.269931	0.256546	0.0944481	-0.0991923	-0.091438	0.00412377	-0.000306857	-0.0111334	0.0395125	-0.0423517	0.00884826	0.00812044	-0.00195888	-0.0375873	0.0826267	-0.00406204	0.0430102	0.0382034	0.00293167	-0.00235671	-0.0169179	0.00185691	-0.00116866	-0.00893372	0.0142177	-0.0168768	0.0105972	0.00869603	0.000309521	-0.00394858	0.00848057	-0.000591034	0.00430314	0.00453487	0.00715468	-0.00820053	0.0162618	-0.0020922	-0.00114631	-0.0106049
Revilloceras granofalcatum	Klug et al. (2006, text-fig. 35F)	0.712442	-0.701686	0.65389	0.659713	0.00312364	-0.398782	0.288638	0.00348824	0.266372	0.273776	0.118966	-0.115114	-0.104244	-0.00127881	0.00114517	-0.0463475	0.0465268	-0.0442394	0.016655	0.0177359	0.00130706	-0.0375929	0.063088	0.00224909	0.024106	0.0258705	0.0193164	-0.0178016	9.62226e-05	0.000136787	0.000168435	-0.0114941	0.00163581	-0.00119004	0.0137473	0.0150205	0.00136129	-0.0255463	0.00405886	0.000381505	0.00473244	0.00527509	0.00897773	-0.00832456	0.0133572	0.000815147	5.7331e-05	-0.00138393
Revilloceras granofalcatum	unpubished	0.732932	-0.680219	0.498427	0.526319	0.0153157	-0.252827	0.251988	0.0148889	0.201516	0.245631	0.132683	-0.110406	-0.117643	-0.0145931	0.00827411	-0.0600457	0.0789147	-0.0566199	0.0127029	0.0171426	-0.000207299	0.00271916	0.0625212	0.0123087	0.0113752	0.0189073	0.0101173	-0.00681205	-0.00676842	-0.00182638	0.00371591	-0.0162115	0.01394	-0.00700017	0.00334577	0.00521324	0.00394784	-0.0116974	-0.00425899	-0.00144251	0.00675112	0.0149368	0.0206773	-0.00990324	-0.00653923	-0.00263122	0.00169662	-0.00397238
Semibollandites qawiy	Bockwinkel et al. (2010, text-fig. 53C)	0.589668	-0.807604	0.576933	0.414135	0.0285459	0.0864145	0.240892	-0.0830409	0.124341	0.0430067	0.0416125	-0.127664	-0.0291468	0.0192579	0.00925836	0.0124505	0.00146921	-0.0487818	0.0357884	-0.00118073	0.0325113	0.0251288	0.0250688	-0.0362569	0.00222803	-0.000491705	-0.00638218	-0.0212104	-0.0035352	0.00771424	0.0175705	0.00602095	-0.0110928	-0.0179937	0.00835725	-0.00751773	0.0318789	0.00240591	9.88001e-05	-0.0170496	-0.0166423	0.018849	-0.00199732	-0.00130062	-0.00507481	-0.02259	0.00734629	-0.00266008
Semibollandites qawiy	Bockwinkel et al. (2010, text-fig. 53D)	0.297656	-0.869319	0.943746	0.330295	0.217149	0.168701	0.18411	-0.231154	0.0446062	-0.0297815	-0.0470765	-0.0708086	0.0128323	0.0480429	0.0989229	-0.0238531	-0.0171581	-0.00086563	0.0060449	-0.0588498	0.0147399	-0.0350659	-0.0139741	-0.00590382	0.0291037	0.0260223	0.027488	-0.0289176	-0.0187865	0.0107844	-0.010995	-0.0215094	-0.00291437	-0.0148982	0.00252629	-0.000717493	0.00996528	0.00154191	0.00288319	-0.0121624	-0.000478282	0.000844753	-0.0138356	-0.0077215	0.00315585	0.00335783	0.0021556	-0.00249465
Semibollandites qawiy	Bockwinkel et al. (2010, text-fig. 53F)	0.484863	-0.829759	0.866091	0.499494	0.0735213	0.130747	0.294348	-0.169142	0.169803	0.00238276	0.00144038	-0.120113	-0.0473817	0.0789153	0.0703509	0.0411663	-0.0197642	-0.0356019	0.0636165	-0.0359206	0.0410461	0.000967069	0.0005289	-0.0243871	-0.00106943	0.00199258	0.00648449	0.00385859	0.0126865	0.0243084	0.0418991	-0.0231479	-0.0300547	-0.00136812	-0.000190314	-0.000788411	0.0188333	-0.0292009	0.000206356	-9.61173e-05	0.0146435	0.0289553	0.0133517	-0.00741087	-0.0198071	-0.00126739	0.000622713	-0.0139328
Sudeticeras fornicum	Klug et al. (2006, text-fig. 15B)	0.71652	-0.697551	0.665942	0.682072	0.00646807	-0.341703	0.228624	0.00713222	0.252717	0.269157	0.135011	-0.125451	-0.083036	-0.0028358	0.00181444	-0.0377529	0.0352423	-0.0315433	0.0117184	0.013501	0.00256788	-0.039681	0.055093	0.00392771	0.037837	0.0440645	0.0159973	-0.012689	-0.0124189	-0.00077111	0.00249349	-0.0286517	0.00827007	-0.00683995	0.00940242	0.0115355	0.00088567	-0.00655781	0.0138033	0.00182256	0.0010061	0.0016882	0.00802313	-0.00585531	0.0187119	0.0022955	0.00228806	-0.0162451
Sudeticeras fornicum	Klug et al. (2006, text-fig. 15C)	0.589836	-0.807511	0.772872	0.562898	-0.0066472	-0.0189857	0.349877	-0.112339	0.278838	0.0921678	0.0549554	-0.166375	-0.124916	0.0896866	0.0247008	0.0344016	0.000672338	-0.104135	0.095246	0.000789902	0.0476483	0.0353794	0.0255182	-0.0343223	0.00197205	-0.00049776	0.00444548	0.0144006	-0.00286879	0.00817265	0.00787033	0.00271485	-0.00765202	-0.0107785	0.023798	-0.0168571	0.0170245	0.000400018	0.00018935	-0.00668969	9.89033e-05	-0.000215354	0.00185928	0.00154019	0.00232272	0.00785336	0.0164927	-0.00509422
Sudeticeras horoni	Korn & Ebbighausen (2008, text-fig. 62D)	0.494143	-0.69763	0.817322	0.576169	-0.0648034	-0.17526	0.262553	-0.0912187	0.353249	0.0964362	0.0413065	-0.147938	-0.0913197	0.076562	0.00524719	0.0061267	-0.00377723	-0.0427856	0.0487957	-0.00242773	0.00489015	0.00297831	0.0396865	-0.0660973	0.0428615	-0.0192271	0.00614235	0.0120464	-0.00462571	0.0254058	-0.00876478	-0.000651106	-0.002245	-0.00181642	0.0282489	-0.0274654	0.00190923	-0.000435516	-0.000466712	-0.00858849	0.00367022	-0.00671089	-0.00161663	-0.000611756	9.78606e-05	0.000972643	0.00788344	-0.00379378
Sudeticeras ibnbajjahi	Korn & Ebbighausen (2008, text-fig. 56G)	0.431314	-0.712017	0.855753	0.517382	-0.0389021	-0.0778345	0.278512	-0.147226	0.325264	0.0230143	0.00852186	-0.13003	-0.0862657	0.120809	0.0213392	0.0146472	-0.0247549	-0.0585444	0.0792531	-0.0356149	0.0290574	0.00417413	0.00636757	-0.0503191	0.0122941	-0.0151425	0.0166909	0.0134485	0.00768419	0.0217557	0.0144962	-0.00597842	-0.00967709	-0.00212416	0.00682814	-0.0335002	0.00168422	-0.00179525	0.00661931	0.00667779	-0.00250637	-0.00923023	0.00458454	-0.00181023	0.00923855	0.00260291	0.00336879	-0.0131203
Sudeticeras murracaoense	Korn & Ebbighausen (2008, text-fig. 53F)	0.554704	-0.727793	0.79898	0.601194	-0.0500218	-0.173374	0.309358	-0.0876091	0.35818	0.140685	0.0695376	-0.17794	-0.122049	0.0752224	-0.0032037	-0.0063739	0.0047968	-0.0512147	0.0822138	0.00806318	0.00245912	0.00227638	0.0499646	-0.0537419	0.0409216	-0.00696506	-3.54157e-06	0.000597405	-0.0118908	0.0232993	0.00775534	0.00418701	-0.00384379	-0.00764308	0.0336393	-0.0168363	-0.00328115	-0.000680766	0.00164698	-0.00695008	0.00881606	-0.00738911	-0.00125193	-0.00108143	-0.000272484	-0.000536026	0.0115104	-0.00104833
Sudeticeras occultornatum	Klug et al. (2006, text-fig. 19E)	0.561653	-0.825879	0.820283	0.54799	-0.0353482	-0.0854443	0.243743	-0.100174	0.313259	0.0680121	0.0388644	-0.183775	-0.0880057	0.0845912	0.0151285	0.0152589	-0.0126806	-0.0744089	0.0631985	-0.0117222	0.0322278	0.0146855	0.0171474	-0.0395519	0.0288368	-0.0173298	-0.00658778	-0.0103323	-0.00130777	0.0279878	-0.00538807	-0.000524925	-0.0129244	-0.00966863	0.0241789	-0.0337069	0.0144643	-0.00499301	-0.00257806	-0.00670313	0.000871927	-0.00260584	-0.00592222	-0.00134599	0.00355272	0.00413499	0.00809589	-0.00759324
Sudeticeras occultornatum	Klug et al. (2006, text-fig. 19F)	0.567649	-0.732281	0.794814	0.606568	-0.0523951	-0.205653	0.3336	-0.0914334	0.366497	0.159112	0.0651164	-0.155515	-0.127933	0.0698411	-0.000918396	-0.00339222	0.0112685	-0.0694676	0.0789659	0.0105638	0.01214	0.0130952	0.0433584	-0.0429652	0.0371691	-0.00345808	-0.000229114	0.00517593	-0.00642717	0.00998167	-0.0079453	-0.00637321	0.00175423	0.00500768	0.0389924	-0.0150556	-0.00777896	-0.0025503	0.00150379	-0.00750813	0.0165185	-0.0112579	-0.00323155	-0.00485347	-0.000510511	0.00801247	0.00957917	7.60271e-06
Sudeticeras pusillobatum	Klug et al. (2006, text-fig. 17C)	0.502802	-0.693387	0.805641	0.592304	-0.0857545	-0.269381	0.361695	-0.114742	0.383594	0.126627	0.053508	-0.15995	-0.102604	0.0729148	0.0137433	0.0196723	0.000541515	-0.0484943	0.0721727	0.00124706	-0.0133891	-0.00982914	0.0380438	-0.0502431	0.0496789	-0.0158248	0.00377643	0.0124567	-0.00252159	0.00698851	-0.00419441	-0.00142402	0.00244613	0.00330454	0.0282694	-0.0191643	-0.00749549	-0.000174717	0.000355848	-0.00691764	0.00787083	-0.0108272	-0.00534007	-0.0037722	-0.00267657	-0.00923673	0.0139463	-0.0041006
Sudeticeras pusillobatum	Klug et al. (2006, text-fig. 17D)	0.53826	-0.681223	0.782972	0.62204	-0.0663898	-0.282135	0.374194	-0.0875771	0.363538	0.170079	0.0691196	-0.146795	-0.110294	0.055053	0.00800802	0.0163699	0.0099571	-0.0479031	0.0729074	0.0155568	-0.0128773	-0.0153654	0.0486231	-0.0401637	0.052397	-0.00142712	0.000345357	0.0128235	-0.00443805	0.00579587	-0.00276651	-0.00203906	0.000497362	0.00176645	0.0318869	-0.00797435	-0.00703864	-0.00299883	0.00310718	-0.00738615	0.0108155	-0.00590489	-0.00268997	-0.00531236	0.00217153	-0.0112863	0.0143551	0.00282547
Sudeticeras pusillobatum	unpubished	0.544853	-0.677395	0.779395	0.626533	-0.0617273	-0.280195	0.373459	-0.0821367	0.3583	0.17773	0.0717543	-0.144862	-0.113208	0.0524341	0.00805222	0.0176172	0.0124744	-0.0498225	0.0723113	0.0177984	-0.011145	-0.0144613	0.0499476	-0.037851	0.0513292	0.00131844	-0.000368362	0.0135667	-0.00435264	0.00530461	-0.00284048	-0.00241748	0.000305662	0.00205204	0.0326588	-0.00615119	-0.00732658	-0.00398503	0.00342533	-0.00665333	0.0122968	-0.00518451	-0.00249367	-0.00552181	0.00281062	-0.0100138	0.0146821	0.00400501
Sudeticeras splendens	Korn & Ebbighausen (2008, text-fig. 58B)	0.476999	-0.701545	0.826874	0.562387	-0.014895	-0.0410942	0.322286	-0.128549	0.303583	0.0704099	0.0304161	-0.134006	-0.114748	0.105036	0.0277344	0.0292618	-0.00912793	-0.0649231	0.0981319	-0.0153318	0.0294519	0.0145224	0.0142221	-0.0302282	0.0142006	-0.00822516	0.00725982	0.0124518	-0.00227777	0.0274484	0.0210845	0.00101238	-0.0112151	-0.00920552	0.0200124	-0.0248071	0.00639316	-0.00178175	0.0021522	0.00878077	0.00105453	-0.00385963	0.00662679	0.00142724	0.00518018	0.00641758	0.0127098	-0.0102429
Timimounia lunula	Bockwinkel et al. (2010, text-fig. 58E)	0.515745	-0.856683	0.842959	0.505314	0.0866196	0.163709	0.229182	-0.121065	0.126506	0.00695232	0.00853092	-0.168462	-0.0284733	0.0416352	0.0677991	0.0454165	-0.00206267	-0.00517847	0.0718759	-0.033239	0.00619528	0.00117004	0.0020901	-0.0204952	0.0151973	-0.0209739	0.00488407	0.00360981	0.0165003	0.0398024	0.0323806	-0.0129685	-0.0375232	-0.00550637	0.00263705	-0.0173045	0.0219574	-0.0267834	0.00865619	0.0068477	0.00813578	0.0229172	0.00359526	-0.000758041	-0.0094885	-0.00187307	0.00425152	-0.0212658
Trimorphoceras absolutum	Ebbighausen et al. (2010, text-fig. 31C)	0.65992	-0.751278	0.444915	0.380775	0.00523461	0.0553844	0.205405	-0.0294271	0.152683	0.0989298	0.127104	-0.196067	-0.0815929	0.0245416	-0.00492352	-0.0206035	0.0329909	-0.0723141	0.0300263	0.0143999	0.0250765	0.0560636	0.0551628	-0.0248363	-0.0204308	-0.00583877	0.00723227	-0.0231103	0.00409929	-0.00269396	-0.00361219	-0.00542606	0.00168253	-0.0108446	0.015427	0.00240991	0.0104929	0.0124934	0.00717395	-0.00621824	-0.0149689	-7.29401e-05	0.000199302	-0.0175421	0.00887846	-0.0101959	0.0013104	0.000794077
Trimorphoceras azzelmattiense	Korn et al. (2010, text-fig. 10B)	0.576151	-0.817305	0.575335	0.398664	0.0575097	0.163795	0.219181	-0.0790654	0.116052	0.0304062	0.0521225	-0.197273	-0.0445465	0.0390735	0.0124453	0.0128594	-0.00558841	-0.0489248	0.0542835	-0.00387024	0.0546779	0.0306442	0.0320718	-0.0563344	-0.0341093	0.0166637	-1.35073e-05	-0.000621598	0.00331076	-0.0216319	0.00905969	0.00193167	0.00851766	0.0081762	0.017557	-0.0178605	0.000282364	-7.03552e-05	-0.00118678	-0.00696629	-0.00234414	0.00558859	-0.00507363	-0.00224129	-0.00575978	-0.0092998	0.00950005	-0.00561127
Trimorphoceras crassilens	Ebbighausen et al. (2010, text-fig. 30I)	0.613527	-0.789616	0.54928	0.418079	0.0276629	0.111946	0.231518	-0.0619568	0.159796	0.0682653	0.0932931	-0.220245	-0.0719307	0.0405063	0.00487752	0.0074404	0.00760675	-0.0526467	0.0591221	0.0086535	0.0334906	0.0353472	0.0382857	-0.0374692	-0.00792315	0.000700485	-0.0032269	-0.0258946	-0.00714913	0.0119834	0.0143181	0.00836941	-0.00828173	-0.0206882	0.014842	-0.00586606	0.027644	0.00808237	0.00471297	-0.0159383	-0.0209614	0.0153849	-0.00434018	-0.00565296	0.00039092	-0.020473	0.00681862	0.000276265
Trimorphoceras crassilens	Ebbighausen et al. (2010, text-fig. 30J)	0.463509	-0.886092	0.67511	0.353433	0.139221	0.200853	0.237917	-0.164362	0.0853943	-0.0110978	-0.0278171	-0.218187	-0.0204173	0.0559007	0.0759639	0.0279426	-0.0256527	-0.0279217	0.0452384	-0.0398223	0.0534358	-0.0140646	-0.0128329	-0.0487896	-0.00933749	0.0409407	0.00859642	0.00193806	-0.0195474	-0.0165634	0.0123668	-0.014463	0.0170778	-0.00695192	-0.00762235	-0.0203248	-0.000709671	0.00724149	-0.00715344	-0.00054573	0.00118613	0.000792838	0.00356224	-0.00535824	-0.00475397	0.00264013	-0.00611705	-0.0112709
Trimorphoceras crassilens	Ebbighausen et al. (2010, text-fig. 30K)	0.701851	-0.712307	0.379534	0.379901	0.00147194	0.0543841	0.182022	-0.00138063	0.109972	0.106282	0.148813	-0.152254	-0.0347117	0.000740692	-0.00158599	-0.0577565	0.0179763	-0.0196273	0.0221392	0.0215367	0.00108124	0.00407751	0.0423012	-0.00136853	0.026944	0.0263141	0.0282981	-0.0301031	-0.0425125	0.000696959	-0.000203967	-0.0076144	0.0304525	-0.0316131	0.00434108	0.00411787	0.000931094	0.0378178	0.00868765	-0.000362019	-0.0172933	-0.0165426	0.0125607	-0.0138706	0.0130247	-2.57076e-05	-0.00047688	-0.00423356
[truncated: 72 more columns]

## Sheet: PCA EL
		PC1	PC2		PC3	PC4	PC5	PC6	PC7	PC8	PC9	PC10	PC11	PC12	PC13	PC14	PC15	PC16	PC17	PC18	PC19	PC20	PC21	PC22	PC23	PC24	PC25	PC26	PC27	PC28	PC29	PC30	PC31	PC32	PC33	PC34	PC35	PC36	PC37	PC38	PC39	PC40	PC41	PC42	PC43	PC44	PC45	PC46	PC47
Ammonellipsites conradae	Ebbighausen et al. (2010, text-fig. 18B)	0.40005	-0.88792		-0.23261	0.13152	-0.2145	-2.0897	0.49022	0.73725	0.17494	-0.59323	0.03124	0.27727	0.36228	-0.14568	-0.19938	1.7543	-0.30677	-0.56012	-0.031577	-0.34086	-0.6854	-0.76947	0.55987	1.0545	-0.43187	0.066104	-0.89659	-0.288	0.24541	-0.12433	-1.0234	0.024577	-0.13331	-1.7139	0.31795	0.95694	-0.028872	-0.23625	0.99089	1.6735	-0.12071	0.073366	-0.83742	0.38635	0.34897	-1.5903	-0.63178
Ammonellipsites menchikoffi	Ebbighausen et al. (2010, text-fig. 16B)	-0.38472	-0.86968		-0.71528	-0.61027	-0.035829	-1.58	-0.096155	0.85741	-0.44559	1.4411	0.0093734	0.036025	-1.2429	0.49496	-0.36465	0.31483	0.57335	1.0249	0.66352	-0.35646	-0.29617	-0.61729	1.0596	-0.85475	0.38659	-0.87263	1.1284	-1.4439	-0.4838	0.15118	-0.72995	-0.98189	-1.5546	0.13384	0.29034	-1.4598	0.97782	-0.41096	-0.71017	1.8595	0.50326	1.9826	-0.016608	-1.1496	1.4515	0.59113	-0.57687
Ammonellipsites menchikoffi	Ebbighausen et al. (2010, text-fig. 16C)	0.36845	-1.2396		-0.36616	0.37525	-0.39835	-0.21311	0.64756	-0.077269	0.66072	-0.32972	0.24237	0.67785	0.14033	0.59961	0.51775	0.94115	-0.082197	0.025045	1.11	0.073565	-0.21081	0.51875	0.10978	0.72028	-1.9847	-0.19395	-1.6375	-0.62236	0.25265	0.51722	0.46164	0.33106	0.15419	0.31471	0.40666	1.244	0.10351	1.4936	0.65364	0.79657	0.86799	-0.35544	-0.51618	0.84216	0.87796	0.20855	-0.11208
Arnsbergites arnsbergensis	Korn (1988, text-fig. 48B)	0.36134	1.2012		0.20513	-0.69884	-0.54667	-2.0879	-0.053842	0.3213	-0.081568	0.16187	-0.054611	-0.2209	1.1182	0.24661	1.4252	-1.0336	-0.86029	0.058298	0.11617	-0.016284	0.10939	0.59466	-0.28117	-0.79117	1.6156	-0.18827	-1.3833	2.4455	-0.44834	-1.5845	0.1801	0.58994	-1.1018	0.38717	-0.39258	0.10626	0.031076	-0.0048974	1.1423	-1.4036	0.67679	2.1336	1.5486	-0.6983	-0.44429	1.3723	1.3426
Arnsbergites ferrus	Korn & Ebbighausen (2008, text-fig. 31G)	1.2296	1.3361		-0.033132	0.11354	0.41399	-1.3705	-0.82827	-0.23564	-0.10935	0.26954	-0.99652	-0.62279	-0.3256	-0.37107	1.2187	1.162	1.3422	-0.084762	0.45638	0.70928	0.0003519	0.63602	1.7358	-0.55633	-0.067599	-1.2381	-0.37315	-0.66431	0.043455	1.0236	-0.32819	0.56875	2.8505	-0.24288	-1.7153	-0.1081	0.40434	0.22464	-1.3128	0.35757	-0.28993	0.60729	0.22021	0.25632	-1.4044	0.77019	2.0742
Arnsbergites proiecturus	Korn & Ebbighausen (2008, text-fig. 35C)	1.3045	-0.71636		0.41688	0.96476	0.33317	-0.048123	0.47894	0.36746	-1.0471	-0.46272	-0.41619	-0.66259	-0.16754	1.1137	-0.51604	-0.21161	-0.98622	-0.6281	-2.0359	-0.82351	0.79286	-0.033334	-1.5235	-1.1906	-0.3479	-0.89444	0.8219	-2.0591	-1.1511	0.68835	-1.425	-0.20354	0.40676	1.7029	0.29157	-0.0026707	0.96283	1.6585	-0.89394	-1.2172	0.91539	-0.85184	-0.96444	0.22204	-0.73031	1.4595	2.2926
Arnsbergites rufus	Korn & Ebbighausen (2008, text-fig. 38B)	1.751	0.15077		0.26159	1.4051	1.4443	-0.2	0.20706	-0.70621	-2.1693	0.57239	0.40367	-0.66408	-0.63093	0.11159	0.083108	-0.2526	-0.65182	-0.80213	1.1198	0.32549	-0.89048	0.3271	-0.84635	-0.99229	0.45205	1.0655	-0.14536	0.055602	0.71241	-1.0558	0.52418	0.89735	-0.37246	-1.0245	1.0017	-1.7043	-1.8735	0.99734	0.18416	1.0969	1.2028	-0.24637	0.68891	1.4131	0.31857	-0.51426	-2.2174
Arnsbergites sphaericostriatus	Korn & Ebbighausen (2008, text-fig. 28D)	1.4938	-0.48534		0.27717	1.3867	0.88236	0.25612	0.47357	0.08324	-1.4962	-0.013479	0.36949	-0.38435	-0.31026	1.7714	-0.38099	-0.65807	0.037125	-0.23324	-0.6753	-0.47287	-0.59544	-0.87027	-1.1543	-0.86909	-0.015836	-1.2945	0.033152	-0.91276	-0.41866	-0.59295	0.33132	-0.96946	0.49821	2.3189	0.096229	0.020888	0.39012	1.1664	-0.41933	0.1453	1.4489	-1.0114	0.58786	-0.51503	-0.18225	-0.021267	0.16162
Arnsbergites warslowensis	Korn & Ebbighausen (2008, text-fig. 26C)	0.96513	0.73119		0.26976	-0.25527	0.56833	-0.10925	1.1758	-1.2974	1.1923	0.38878	-0.78075	0.32552	0.44545	0.20533	2.5093	1.1137	-1.1747	1.2159	-0.93406	0.58036	-0.99289	-0.86735	-0.91985	0.30622	-0.47998	-1.0218	1.6807	-0.038837	-0.2767	-0.38588	-1.3608	-0.3349	-0.17738	-0.8764	-0.98605	-0.46771	-0.92634	-0.9703	-1.3857	-1.2693	1.6284	0.1468	0.26034	1.7294	-0.67677	0.3556	-0.075868
Benimehlalites belkassemensis	Bockwinkel et al. (2010, text-fig. 32C)	-1.8555	0.20775		1.0327	0.53107	1.5493	0.56544	0.031405	0.94155	-0.39738	-0.8014	0.12856	0.59056	2.0493	0.54878	0.52023	1.3614	0.52387	0.91918	1.4172	-1.4225	-1.579	-0.54648	0.78641	-0.8761	0.67017	-1.1993	-0.30533	1.0362	-2.2088	1.951	-0.10842	2.1375	-1.6799	-1.1719	1.6433	0.39474	-0.8116	0.60028	0.2208	0.35577	-2.0789	-1.7554	-0.63326	-1.5883	-0.11938	1.4732	1.0018
Benimehlalites benimehlalensis	Bockwinkel et al. (2010, text-fig. 30B)	-0.80911	-1.1924		0.51648	-0.44714	-0.46651	0.12232	-1.2544	-0.95127	0.27074	1.2481	-0.55429	-0.74731	-0.80885	1.1432	1.8753	-0.27287	0.5309	0.11152	-0.11205	1.1314	-0.091448	0.025378	0.85477	0.46751	-0.77829	-0.12337	0.32674	-0.025861	0.5872	-0.48286	-0.55627	0.50046	0.12127	0.77777	0.38452	-0.59929	-0.8254	1.4696	-0.47647	1.0272	-0.73549	-0.3487	0.93551	0.82935	0.12556	0.56026	0.066832
Bollandites nitens	Bockwinkel et al. (2010, 20% extended)	-1.3068	-0.1991		1.7088	-0.68778	0.1837	0.44454	-0.19467	-0.86303	-1.479	-0.86572	-0.91412	0.52303	0.89175	0.75902	0.5901	0.20326	0.10771	-0.49495	-0.048139	-0.14369	0.46228	1.4025	0.61437	-0.16953	0.7002	0.45287	-0.18062	1.0048	-0.94254	-1.3286	0.022823	-3.1094	-0.5768	-0.8851	-0.79139	3.2748	0.90411	-0.71081	-0.44386	1.399	0.91974	2.0275	-0.047333	0.5974	1.0055	-0.73001	0.74518
Bollandites nitens	Bockwinkel et al. (2010, text-fig. 15E)	-0.14248	-0.29242		1.232	-0.99928	-0.62834	-2.1094	-0.97167	-0.30378	0.78004	-0.085377	0.28453	0.67231	-0.57497	-0.33444	-1.29	-0.074501	-2.0881	-0.8044	1.7311	-1.0177	-0.18069	-0.86074	1.0627	-2.845	-1.2847	1.5252	-1.0641	-0.50608	-0.93242	0.71318	0.053782	-0.061596	2.4898	0.74761	0.12352	-0.27515	1.1189	1.445	-2.5274	1.7642	-0.92154	0.011646	-1.1578	-0.43795	-1.773	0.26899	-1.1974
Bollandites nitens	Bockwinkel et al. (2010, text-fig. 15G)	-0.65826	-1.1428		0.96955	-0.82001	-0.84073	0.24944	-0.85883	-1.0512	-0.3027	0.010524	-1.4061	0.12	-1.6417	-0.093798	1.6753	-0.84822	0.94392	1.0533	-0.32848	1.2227	0.45982	-0.12706	-0.6423	-0.9973	-1.0654	-0.060544	-0.29395	0.42765	-0.4396	-0.0095251	0.13874	0.23887	-1.9573	1.1752	-1.0485	-1.6387	-0.51079	1.6138	-0.5107	-1.5568	-0.4619	0.44536	1.9897	-0.014937	0.1262	1.1146	0.098695
Bollandoceras mirrih	Bockwinkel et al. (2010, text-fig. 25D)	-0.97122	-0.64404		1.0948	-0.1832	-0.22167	-1.2023	-0.88616	-2.4836	-0.39235	1.166	-0.19602	-0.59933	0.19811	0.70938	2.5118	0.088325	-0.76225	-0.40537	-0.36915	-0.53702	0.49439	0.69304	0.74055	0.18002	-0.91167	0.12638	-0.37831	1.1119	-0.55359	-1.3522	0.7379	-0.94293	0.1137	1.2342	-1.5744	1.2928	-0.078317	-0.56293	-0.54795	-1.0766	-1.2856	0.96988	-0.060251	-0.188	-1.4244	-1.5218	-1.2219
Bollandoceras mirrih	Bockwinkel et al. (2010, text-fig. 25E)	-0.64978	-0.66691		0.088655	-0.40086	-0.098429	-1.0045	-0.60474	-0.90461	0.15444	1.5703	0.35474	-1.0961	-0.86075	0.84233	1.1361	0.22884	-0.65916	-0.32454	0.48296	-1.1791	0.2155	-0.89765	1.9411	-0.58757	-0.3558	-0.30821	0.17194	-2.476	-1.0846	-0.78093	2.471	-1.2931	-1.215	0.80582	-0.47567	0.1699	-1.0201	-2.1671	0.67787	-0.72993	1.282	-1.5023	-0.57212	-3.2246	0.24744	-1.8153	1.082
Calygirtyoceras zrigatense	Klug et al. (2006, text-fig. 12)	1.0909	0.36173		0.53461	0.2385	0.69684	-1.2024	-1.0877	0.028517	0.80165	-0.98302	0.49407	1.2788	-0.44668	0.58906	-3.1288	0.2537	3.9768	-0.085411	0.62714	0.54849	-0.80973	-1.0764	1.2774	3.8387	-0.64388	-1.3925	1.4119	1.9371	0.41057	-1.8267	1.0693	-1.0251	0.019895	2.5575	-0.62105	0.38091	1.2857	0.44551	-0.93988	-1.2174	0.12574	-0.13353	0.32791	-0.94271	-0.6019	1.0383	-0.54467
Dzhaprakoceras dzazairense	Ebbighausen et al. (2010, text-fig. 42L)	0.15787	-1.6072		0.05787	-0.068599	-0.94942	-0.44225	-0.51434	0.95797	0.65642	-1.2076	-0.10167	0.60823	-0.91675	-0.2133	0.42009	0.39499	-0.37813	-0.20605	-0.62934	0.57876	0.3044	1.5149	-1.6362	0.60169	-1.0408	-1.014	-1.1709	-0.019372	0.61668	-0.59986	0.35997	0.58229	0.1955	0.45995	0.8334	1.9545	-0.34059	0.91084	-0.1433	0.92502	1.1125	-0.31584	0.21502	-0.65134	-1.2685	0.084348	-0.93574
Eoglyphioceras minutum	Korn & Ebbighausen (2008, text-fig. 6B)	-0.97716	-1.1029		1.0812	-0.85935	-0.50595	0.60186	-1.0535	-0.44759	-1.3177	-0.59202	-1.9732	0.33053	-0.76701	-0.34814	0.017009	-1.8816	2.5504	1.1915	0.62551	0.20462	-0.36772	0.216	-0.78981	0.1921	-0.0034811	2.8136	-0.74307	-1.9255	0.032262	-0.34952	0.93154	-0.70559	-0.99211	-0.85567	-0.36317	-0.80927	-0.29875	0.53237	0.42585	-0.032208	0.40754	-1.1424	0.81831	0.55879	-0.79093	-0.2585	0.034895
Eurites commutatus	Ebbighausen et al. (2010, text-fig. 25G)	-1.3578	-0.22627		1.0737	-0.79396	0.47872	0.81717	-0.33874	0.54898	-1.5503	-0.26863	-0.25461	-1.2764	1.3061	0.30805	-0.6055	1.451	-0.57553	-0.44794	-0.21215	-0.23742	-0.46155	0.14065	0.89224	0.43365	0.28333	0.85398	0.71984	0.47945	0.86361	0.56028	-0.16456	-1.7316	1.2618	-1.3847	-0.6862	-0.17797	0.66889	0.8163	-0.18705	-0.20887	1.7786	0.62895	-0.33309	-0.86198	0.93033	-0.32237	1.1099
Eurites pondus	Ebbighausen et al. (2010, text-fig. 26C)	-0.36785	-1.415		0.65957	-0.74718	-1.0396	-0.099915	-1.1559	-0.28676	-0.031063	-0.5588	-1.0988	0.10995	-1.6688	-2.5357	-0.28702	0.52217	-0.23773	0.10594	0.015919	1.3346	0.40271	0.096434	-0.66465	-0.092321	-0.64032	-0.82317	1.007	1.0646	-0.73541	0.88012	0.0048351	1.5745	-1.1676	-0.68906	0.0035345	-0.55455	-0.083687	-0.22325	-0.8772	0.26202	0.65787	-0.51757	1.3657	0.66604	-1.1069	-0.10602	-1.6331
Eurites temertassetensis	Korn et al. (2010, text-fig. 8F)	-0.24397	-1.6945		0.40765	0.0063764	-0.89573	1.335	-2.7248	0.13659	2.2084	-0.1822	1.9058	1.9565	0.5694	-0.32109	-0.61913	-0.70686	0.60461	0.48196	-0.65963	-1.9575	-0.65878	1.6569	0.62589	-0.86932	1.212	0.57132	1.9608	0.17629	0.90798	0.67707	0.078263	-0.13745	0.31922	0.41483	-0.66395	-1.6868	-1.1312	-1.6111	1.1455	-0.085537	0.46182	-0.47034	-0.95292	0.6392	-0.70981	-0.12925	-0.26074
Girtyoceras ibnkhaldouni	Korn & Ebbighausen (2008, text-fig. 10C)	0.24274	1.5226		-0.0092937	2.0605	-2.6072	-0.12204	-3.4667	-0.83246	0.24881	1.6316	1.0104	-2.0433	1.8679	0.81242	-1.1487	1.1439	0.58554	0.87486	0.29438	-2.3909	-0.22482	-1.0439	-3.6712	0.62083	0.66639	0.6876	0.83402	0.86938	-1.0948	-0.96131	0.35828	-0.33953	1.1788	-1.1293	-2.4845	0.88463	-2.3454	1.4246	0.59268	1.1849	0.60757	0.47622	-0.26407	-0.53396	0.60587	2.3544	-0.62424
Girtyoceras luscinia	Korn & Ebbighausen (2008, text-fig. 8D)	-1.1318	1.4995		-0.63253	3.9788	-4.6718	0.15354	0.49966	0.42573	-0.44124	-0.30868	-1.2142	-1.164	-3.1824	-1.039	0.074805	1.4042	-0.27579	2.3762	1.0027	-0.77598	-0.37933	-0.97651	0.37298	0.008247	1.1873	1.1323	0.14917	0.049364	0.97021	0.61175	1.0566	-0.73957	0.37501	0.34839	2.6886	1.4568	1.1042	0.080397	-0.31397	-2.7795	-0.80221	0.62071	-0.71555	1.1028	-0.41072	-1.1678	0.38078
Goniatites americanus	Korn & Titus (2011, text-fig. 42B)	-1.9066	0.6686	0.6686	1.8135	1.6356	0.72299	0.33504	1.1062	-0.24395	0.19858	-0.91245	-0.10295	1.6877	0.0090096	-0.59608	0.37897	0.82142	0.57073	0.82116	-1.7843	-1.6849	-0.034077	-0.78363	0.98515	-1.1885	0.81352	-0.18246	-0.49182	-0.29082	0.62435	-1.5479	-0.6035	3.1808	1.3158	-0.78518	-0.55368	-0.84383	1.4148	0.58063	-1.3521	-0.44931	1.5847	-2.2936	0.56613	-1.1069	1.2279	0.0036954	-0.072266
Goniatites americanus	Korn & Titus (2011, text-fig. 42C)	-0.31565	-0.79483	-0.79483	-1.5229	-0.80913	0.28282	-0.36829	0.10175	1.7704	-0.56802	1.6445	-0.11936	-0.055012	-1.0235	0.025506	-0.15703	0.86446	0.14297	1.2022	-0.242	0.76651	-0.21593	-1.2548	-1.0043	-1.3189	0.45079	0.22054	1.993	0.47044	-1.2663	-0.15765	0.31688	-0.15684	-1.2781	0.59767	-0.004659	-0.094581	1.6728	0.15709	-0.20072	2.1265	0.44101	0.36221	0.10796	-0.94092	0.92866	-1.9142	0.70924
Goniatites americanus	Korn & Titus (2011, text-fig. 43G)	0.54079	-1.5909	-1.5909	-0.5011	0.68903	-0.50815	0.61319	0.45175	0.38315	0.15366	-0.89436	0.23813	0.014233	0.84551	-0.15078	0.34045	-0.18824	-0.59411	-0.4269	0.43019	0.28975	0.99707	0.16326	-0.23928	1.2914	-0.57953	0.057601	0.13596	-0.81044	-0.68964	-1.3108	0.57547	0.8815	0.51933	0.52947	0.93814	1.3957	-0.1494	0.59737	0.66599	1.3773	1.6277	0.3436	0.092143	0.13174	0.45433	0.4914	0.38009
Goniatites americanus	Korn & Titus (2011, text-fig. 43H)	0.77273	-0.82053	-0.82053	-0.31607	0.47796	0.1608	-0.16891	-0.045491	0.61984	0.4674	-0.37323	0.41068	0.45519	0.9877	-0.12247	-0.72639	1.1542	-0.98838	-0.59083	0.12684	0.30045	1.5454	-1.6869	0.30452	1.5525	0.8977	1.2954	0.19749	-1.2919	-1.4283	0.30907	-0.00021613	0.71334	-0.34707	0.093952	-1.6311	0.14372	0.63774	0.98234	-1.0175	-0.75732	-0.71734	-0.61669	1.1945	0.29264	0.057264	-0.81548	2.8655
Goniatites americanus	Korn & Titus (2011, text-fig. 43I)	0.47045	-0.94351	-0.94351	-0.23629	0.45621	-0.05525	0.14195	0.020696	-0.22166	1.2128	0.092498	0.49706	1.1583	1.0228	0.61059	0.33951	1.046	-0.71546	-0.45772	1.2053	0.20539	0.80704	0.27974	-0.92935	0.35707	0.75663	0.53835	-1.3098	-1.5127	-1.0991	-0.61465	0.61314	-0.21153	0.097077	0.49942	0.3347	-1.5347	1.0458	-0.31128	0.40574	-0.65891	-1.2736	1.2484	1.8373	0.80096	1.6849	0.019092	0.51121
Goniatites americanus	Korn & Titus (2011, text-fig. 43J)	0.39249	0.93921	0.93921	0.098783	-1.3583	0.26164	-0.37429	0.42834	0.21661	0.50861	-0.47091	-0.24953	-0.59514	1.0571	-3.3514	0.62261	-0.16052	-2.5643	-1.0639	-0.28555	-0.48325	-1.018	-1.5626	0.37672	0.2489	-0.25569	0.86352	0.46199	0.34773	0.68924	-1.1105	1.3543	-0.0015146	-0.13924	-0.028011	0.41813	0.30008	-0.21654	1.5429	1.4517	0.017665	0.79081	-0.18638	0.21207	-0.36163	-1.8787	-0.33739	1.2182
Goniatites crenistria	Korn (1988, text-fig. 33A)	-0.12647	-0.54683	-0.54683	-0.38578	-0.53218	-0.076553	-0.2313	0.87731	-0.50052	0.026039	0.94239	-0.44776	0.55587	-0.49792	-1.0567	-0.34765	0.62051	0.23987	-0.20587	0.61357	-0.47943	-0.30974	0.10145	-0.62114	-0.89982	1.5397	-1.9982	-0.79269	1.0713	-0.67313	-0.71337	-0.99916	0.21201	0.78535	0.0087726	-0.80903	-0.51529	-0.91765	-0.14638	0.21759	0.077924	-0.39495	1.6311	-0.23735	0.32204	0.12621	-0.56486	0.89505
Goniatites crenistria	Korn (1988, text-fig. 33B)	-0.62489	-0.6234	-0.6234	-0.58965	-0.19346	0.31756	0.40964	0.62031	-1.4104	-0.4888	1.7366	-0.57671	0.78343	-0.16195	-1.2503	-0.15884	0.3744	1.1229	-1.2775	-0.90006	-0.16941	0.4349	-0.86357	0.20028	0.34165	0.43697	-0.26831	-1.1829	-0.40444	-0.23763	-0.0037208	-1.3195	-0.46944	1.1071	1.1893	1.6207	0.27302	-0.93093	-0.56114	1.765	-0.48062	-0.15704	0.96344	-0.22587	0.4654	1.1653	1.6534	-0.11039
Goniatites crenistria	Korn (1988, text-fig. 33C)	-0.6506	-0.12523	-0.12523	-0.69255	-0.44347	0.52682	-0.041035	0.71476	-0.97375	-0.63676	1.6855	0.26211	0.64769	-0.14348	-1.4013	-0.31987	0.36252	-0.031494	-1.3597	-1.4648	-0.22472	0.56191	-1.5424	-0.75927	0.68782	0.42117	0.19622	-0.65967	0.49196	0.5479	1.4568	-0.10427	0.026125	0.85144	1.544	0.39454	0.8328	-0.30764	-0.35659	0.45076	-0.16944	-0.75156	-0.13047	0.59475	0.35283	-0.44411	0.73954	-1.3354
Goniatites crenistria	Korn (1988, text-fig. 33D)	0.40583	-0.74593	-0.74593	-0.16744	-0.13733	-0.29058	-0.52751	1.205	-0.24728	0.0032949	-0.14867	-0.64783	0.12505	0.13791	-1.1377	-0.21592	1.1244	-0.77585	0.081644	0.19484	-1.437	-0.79491	0.90243	0.49917	-0.12644	-0.63287	0.43063	-0.2208	0.41452	-0.82332	-0.19151	-0.25402	-1.2372	0.20075	-0.72958	-0.57555	-1.9411	0.57299	-0.27483	1.3871	-0.9814	-0.25755	-0.69061	0.1335	1.0856	-0.61152	0.90818	0.36213
Goniatites crenistria	Korn (1988, text-fig. 33E)	-0.29865	0.13292	0.13292	-1.39	-0.64163	0.48991	-0.64391	0.63806	-0.21309	-0.29722	1.1309	0.90061	0.68691	-0.3738	-1.896	-0.80969	-0.71034	0.29273	-0.35525	0.061786	0.37034	-0.30683	0.093904	-0.55298	-0.62289	1.1089	0.81798	0.52236	-0.84624	0.03069	-0.13086	-0.48142	0.28672	0.91027	1.2097	0.45535	2.6378	-0.47537	-1.1622	0.5266	-1.2385	1.8068	-1.2955	1.4652	-0.81139	0.88481	0.3953	-0.72693
Goniatites crenistria	Korn (1988, text-fig. 34A)	-1.9384	0.68545	0.68545	0.55808	1.9478	1.5857	-2.2617	0.57599	-0.40784	0.11557	0.06821	-0.1986	1.2692	0.43326	-1.3736	0.2695	-2.0031	-1.2	2.7277	-0.38091	-2.1611	2.432	1.2661	0.69795	1.3014	1.3972	-1.989	0.083789	-0.054544	-1.0196	0.85724	1.3372	-1.0656	-0.78902	0.32978	0.73795	0.93276	-1.4713	1.7683	-1.281	0.62915	-1.1804	-0.40259	-0.46319	0.67253	2.1213	0.065644	-1.373
Goniatites crenistria	Korn (1988, text-fig. 34B)	-1.1045	-0.85103	-0.85103	-0.35773	0.025581	0.59683	-0.71067	-0.75447	-0.32371	-1.4259	1.85	-1.0874	0.6446	1.3531	-0.43024	-0.53815	-0.74849	1.077	0.45776	-0.070203	-0.66844	-0.10618	0.42931	-0.42735	0.96137	-0.80917	0.90493	-0.3506	-1.8038	-0.21489	-0.46736	0.31486	-0.56225	0.23239	-3.0567	2.0774	0.40944	0.92945	-0.60831	-1.618	0.26865	0.66205	1.266	-0.6294	0.95822	-2.112	0.86447	1.8321
Goniatites crenistria	Korn (1988, text-fig. 34C)	-1.8713	0.23831	0.23831	-1.2823	1.3004	2.0211	-0.66739	-0.87303	1.0384	-0.28839	0.7067	0.071902	0.54324	2.2749	-0.59455	-1.5139	-1.3255	-0.81858	2.4377	-1.5854	2.0044	0.48476	0.63812	0.18579	-1.8787	-1.7787	-1.353	-0.53814	0.13017	1.5221	-1.5619	1.2108	-0.69639	0.79139	0.69464	-1.19	0.86913	-0.20114	-0.7785	0.58935	0.48194	-1.6359	-1.9237	1.1168	2.7813	-0.41149	-0.74418	0.93586
Goniatites crenistria	Korn (1988, text-fig. 34D)	-0.66652	-0.056037	-0.056037	-0.15676	-0.62718	0.32217	-0.83852	0.67978	-0.89608	-1.0074	1.3064	0.071765	1.0077	-0.22008	0.12514	0.29495	-0.080338	0.2643	-0.57673	-0.24693	-0.67867	0.98464	-0.82841	-1.0148	1.0847	1.194	-0.65551	-1.2442	1.0102	-0.22091	1.0782	-0.33432	0.54639	-0.34146	0.75499	0.40595	-0.20434	0.010863	-0.53116	0.29398	1.0835	-0.70046	0.76421	-1.2662	0.80605	-0.75859	1.3348	-0.074036
Goniatites crenistria	Korn (1988, text-fig. 34E)	-0.79776	-0.16439	-0.16439	-0.988	-0.4959	0.67764	-0.10721	0.26341	-0.23488	-1.059	1.6337	0.4118	0.56572	0.10344	-0.87889	-0.45257	0.22451	0.1752	-0.43678	-1.4536	0.48033	0.99393	-1.5536	-0.82474	0.87563	0.2743	1.5014	-0.47504	0.15978	0.54273	1.4081	0.86846	-0.082857	1.2305	0.81883	0.77402	1.135	0.62499	-0.65409	0.45124	-1.1674	0.50232	-0.60519	0.82154	-1.7951	-1.1849	0.34186	-1.1576
Goniatites crenistria	Korn & Ebbighausen (2008, text-fig. 18C)	0.77854	0.43781	0.43781	0.59457	-1.0318	0.11744	1.4386	0.4421	0.13002	1.7314	-0.22754	-1.2099	0.1132	0.29402	-0.26244	-0.87689	-0.45505	-1.0973	1.0756	-0.53617	0.32536	0.96426	-0.93061	-0.86556	-0.34373	0.23922	1.0245	0.31155	1.6766	-0.92415	0.14649	0.78343	-0.4528	-0.1385	-0.92995	0.3466	-0.77395	-1.1621	0.84119	-1.0804	-1.3504	1.1236	-0.50498	-0.51248	0.25676	-0.92246	-0.94211	0.13639
Goniatites deceptus	Korn & Titus (2011, text-fig. 48D)	-2.2044	0.81056	0.81056	1.0501	2.6541	1.399	-0.0090121	0.87909	1.6002	1.5372	-0.3248	-0.34955	0.83551	-0.83029	-0.95168	1.3533	-0.48191	1.1112	-0.74309	-0.15079	0.25745	0.31419	-1.044	-0.59328	-0.34872	0.93811	0.58454	0.35392	-0.89712	2.2493	-1.2931	-0.018944	1.0802	0.1512	0.46693	-2.1594	-1.5245	1.5124	0.24206	0.39537	-0.013328	2.0178	2.5699	-2.3872	1.1164	0.63925	0.14554	-0.32831
Goniatites deceptus	Korn & Titus (2011, text-fig. 48E)	0.61394	-0.37993	-0.37993	-0.50975	-0.025136	0.24889	-0.96758	0.23892	1.0292	1.2179	-0.0012633	0.17023	-0.079106	0.13176	1.4881	0.33391	0.91909	-0.023411	0.54904	0.073791	0.88773	0.21402	-0.55195	0.26901	0.69942	0.83173	0.58978	-1.3552	-0.43061	0.5072	0.65668	0.6763	-0.060584	-0.088448	-1.1757	-0.46054	0.023559	0.77358	-0.82	-1.8236	-1.3765	-0.43464	0.73341	2.7796	-0.35052	0.56679	0.77041	0.063961
Goniatites deceptus	Korn & Titus (2011, text-fig. 48F)	-0.0252	0.20898	0.20898	-0.72376	-1.0599	0.19564	-0.13647	0.79551	0.76414	0.65114	0.65901	0.48785	0.051507	-0.76556	0.45964	0.41286	-1.2729	0.46906	0.20615	0.69278	-0.36132	-1.759	-0.40769	-0.32039	0.067581	0.65279	-0.26922	0.2763	-0.87939	0.27721	-1.0291	0.50003	-0.15385	-0.022517	0.23707	1.8042	0.31695	-0.34617	1.6896	-0.25829	0.71387	-1.3387	0.74147	-0.54639	-0.17917	-1.6715	-0.13787	1.522
Goniatites deceptus	Korn & Titus (2011, text-fig. 50E)	0.95567	-1.1311	-1.1311	-0.11338	0.95379	-0.26121	-0.10738	1.3352	-0.4793	-0.77913	-0.50241	-0.23915	-1.1719	1.2717	0.66376	-0.93208	-0.79593	0.54816	-0.47912	-0.1042	-0.17116	1.1596	0.17142	1.0285	-0.64126	-0.17988	-1.1262	1.2256	0.24338	0.40087	-0.71111	-0.14456	0.54847	0.030859	0.7495	0.49495	-0.61183	-0.48147	-0.23561	-0.79775	-0.35579	0.31401	1.7931	-0.4723	-0.60676	-0.14599	-0.81339	-1.1013
Goniatites deceptus	Korn & Titus (2011, text-fig. 50F)	0.78018	-0.45929	-0.45929	-0.015963	-0.22565	0.036805	-0.24962	0.96612	1.2391	0.45321	-0.63066	-1.3683	-0.99794	-0.25501	1.0983	-0.5354	0.46973	-0.012512	0.85294	-1.8245	-1.4915	-0.54837	-0.028144	-0.32669	0.27055	-0.77734	0.18809	0.063119	0.50904	-0.32432	1.3025	0.45355	-0.64445	-0.072426	-0.84929	-0.67591	0.69489	0.79959	-2.1622	1.1603	0.87744	0.28624	-0.203	0.50683	2.2808	-0.54022	-0.018671	0.14181
Goniatites deceptus	Korn & Titus (2011, text-fig. 50G)	1.0239	-0.45558	-0.45558	-0.075349	0.48337	0.22099	-0.15644	1.4766	-0.16115	-0.1956	-0.28955	-0.68791	-0.8328	0.44249	1.2045	-0.78241	0.26181	0.58136	0.65634	-0.75856	-0.99048	-0.07416	-0.094304	0.6539	0.15399	-0.46873	-0.17376	0.83789	0.2202	1.0082	0.96447	-0.60823	-0.1564	-1.0758	0.62942	-1.7174	0.96687	0.37524	-0.68545	0.52124	-0.42828	-0.28919	-0.82475	0.32551	1.1478	-0.85244	-0.86268	1.1601
Goniatites eganensis	Korn & Titus (2011, text-fig. 53B)	0.50248	-0.65462	-0.65462	-1.0176	0.051382	0.1731	-1.014	0.82869	0.98231	0.61611	0.2836	0.39802	0.054311	0.29906	0.93792	0.11754	0.96788	0.0085737	0.91951	-0.15463	0.76717	-0.39072	-0.14489	0.66032	0.87967	0.38775	0.33827	-1.6087	0.05251	1.3422	0.1948	-1.2049	-0.76647	-2.0726	-1.1231	-0.61837	-0.25891	-0.54268	1.1126	-1.4094	-1.2526	-0.95727	-0.26614	-0.82393	-0.75468	-0.012381	-0.39095	-1.6671
Goniatites eganensis	Korn & Titus (2011, text-fig. 53C)	0.42676	-1.321	-1.321	-0.72769	0.46518	-0.33329	-1.0754	1.1496	0.50983	-0.37456	-0.44604	0.072083	-0.54665	0.58879	0.15214	0.15195	0.70281	-0.0047945	-0.51802	0.013387	0.11626	-0.44668	1.0304	0.19287	0.49672	-0.65473	-0.59883	-1.0444	-0.084706	0.46455	-1.0941	-0.64815	0.24752	-1.221	-0.51606	0.9828	0.13456	-1.7161	1.6962	0.091967	-0.85662	1.6476	0.20986	-1.6661	0.35831	-0.59406	-0.21917	-0.82135
Goniatites eganensis	Korn & Titus (2011, text-fig. 53D)	0.6495	-0.79135	-0.79135	-0.80671	0.22721	0.22409	-0.30103	-0.076415	1.4956	1.1209	-0.0068826	0.48771	-0.1517	0.54002	1.5577	-0.049562	0.81376	-0.40858	0.29335	-0.36336	1.1535	1.0614	-0.4764	-0.11965	1.0008	1.6168	0.57057	-1.3976	-0.48004	1.4832	0.30992	-0.059864	0.23459	-0.84688	-0.042747	-0.84644	0.25927	-0.7511	0.38453	-0.81045	0.52444	-0.17007	0.12582	0.22686	-0.18606	0.29595	0.19968	-0.78353
Goniatites eganensis	Korn & Titus (2011, text-fig. 54C)	-0.51534	-0.18314	-0.18314	0.047237	-1.1285	0.020905	-0.012956	0.40948	0.15186	-0.63964	0.81821	-0.005504	0.2747	-0.80103	-0.022159	-0.85705	-0.45861	-0.12267	-0.69361	0.59746	-0.65141	0.15052	-1.455	-0.64899	0.17991	0.87809	-0.7972	-0.28739	-0.95888	0.92507	0.22272	-0.16671	0.61913	-0.32797	0.49954	-0.67672	-1.011	0.69209	-0.12213	0.5918	0.9152	-0.61969	-0.51016	-0.73967	1.0032	-0.7812	0.14955	-0.21719
Goniatites eganensis	Korn & Titus (2011, text-fig. 54D)	-0.095471	-0.034363	-0.034363	-1.9599	-0.37996	0.43372	-0.63438	0.033993	0.21538	1.0499	1.4849	1.4207	-1.1185	0.04929	-0.078136	-0.45371	-0.84526	0.56623	0.56623	-0.36318	0.6228	-1.5996	2.2566	0.6878	-1.753	0.64007	1.0738	1.1732	2.4245	-1.0695	-0.5931	-2.6703	0.4427	0.22181	0.33241	0.97523	1.238	1.2256	0.64961	0.75425	-1.0631	0.42289	-1.1755	0.0093024	0.63767	1.0153	0.24857	0.31561
Goniatites eganensis	Korn & Titus (2011, text-fig. 57E)	-0.63812	-0.028522	-0.028522	-0.38857	-1.0443	0.19844	-1.4251	-0.15544	0.91534	-0.77498	1.0311	0.9637	-1.1745	-0.41271	1.0298	-0.89679	-0.98473	-0.28761	0.41272	1.3169	-0.44114	-0.29323	-0.024019	-0.43784	0.28159	1.4083	-0.06745	1.6648	0.20494	0.56239	0.59796	0.1263	1.0955	-2.1962	-1.3656	0.18622	0.10828	1.4565	-0.86541	0.92126	-0.45556	0.66805	-0.17199	-1.127	0.94491	-1.2527	2.0744	-0.075945
Goniatites eganensis	Korn & Titus (2011, text-fig. 58C)	0.61376	0.16411	0.16411	-1.6832	-0.96267	0.58163	0.58212	0.4487	2.225	0.54644	0.15009	-0.55959	-1.1375	0.069075	-0.77923	2.2285	0.68902	-0.35218	1.5059	-1.2965	0.51857	-1.5352	0.23228	-0.077157	0.38041	0.065428	2.1059	1.1604	-0.076041	-0.9573	-0.56024	1.2006	-0.49753	0.043965	1.6165	-0.26985	-0.30966	-0.67742	0.18756	-0.44359	1.2899	-0.5482	-0.088839	-1.5196	-0.92654	2.1565	0.6636	-0.85227
Goniatites evelinae	Klug et al. (2006, text-fig. 26D)	0.89553	-1.0127	-1.0127	0.18523	0.75402	-0.25919	-0.041812	0.65954	-0.7498	-0.52307	-0.53796	-0.34271	0.12103	1.2837	-0.51582	-1.3811	-0.1614	-0.103	-0.76414	0.27365	-0.78363	2.1167	0.75889	-0.15799	-0.2944	0.34921	1.4699	1.8835	-0.063766	-1.1863	-0.69893	0.14103	1.6333	-0.44447	1.6757	0.89485	-1.7928	-0.40012	-1.0433	-0.67133	-0.56548	-0.84975	1.1043	-0.3762	-0.25692	0.089965	-0.48494	-0.30183
Goniatites gerberi	Klug et al. (2006, text-fig. 24F)	0.38799	-0.46788	-0.46788	-0.22229	-0.4159	-0.092512	0.25661	0.46915	0.23343	1.2644	0.12159	-0.34422	0.39979	0.15461	-0.17706	-1.3448	0.34015	-0.10031	0.42106	0.85384	0.067319	0.15857	-0.22552	0.45207	0.13136	1.0841	0.74297	-1.7965	1.2985	0.7161	-0.18757	0.18861	-0.28277	1.864	-1.2344	-0.25119	-1.5011	-0.11319	-0.61906	-0.38513	0.66859	-1.2434	-0.0021945	0.13379	-0.9037	-1.3029	-0.0073452	-0.40375
Goniatites gerberi	unpubished	0.68759	-0.7211		0.32864	0.094347	-0.2642	0.21159	0.41219	-0.30014	0.73044	-0.55299	-0.69267	0.77285	0.59386	-0.17939	-1.3198	0.64598	-0.24037	0.12365	0.18173	-0.75623	1.4437	0.14355	-0.68891	0.43262	-0.37965	1.5024	0.39865	0.34312	-1.1343	-0.20689	0.7488	0.379	0.73977	-0.089484	0.36679	-0.1137	1.1845	-2.5132	0.5909	1.2253	-1.2992	0.0094205	0.22501	-0.23769	1.3333	-1.4649	0.32809
Goniatites gerberi	unpubished	0.35736	-1.0256		0.024292	0.10151	-0.50893	-0.70551	0.62613	-0.10418	0.66056	-0.54344	-0.17098	0.67248	-0.14332	0.39818	0.56975	1.0572	-0.16701	0.12802	0.51829	-0.55004	-0.19948	0.80295	-0.18139	-0.087399	-1.8618	-0.29125	-1.3498	-0.13564	0.22538	0.56904	0.47162	-0.10862	0.71142	-0.38606	0.5544	0.020384	0.2378	-0.34498	1.4552	-0.72427	1.3829	-0.74259	0.24195	-0.55868	0.87652	1.7258	-0.42877
Goniatites globostriatus	Korn & Ebbighausen (2008, text-fig. 25)	0.58016	0.53153	0.53153	0.49547	-0.8237	0.11103	1.1371	-0.15163	-0.62525	2.4792	0.077424	0.2345	0.22948	0.59816	0.55112	-0.70846	-1.1017	-0.82984	0.033322	0.63036	0.77528	0.83758	-0.7252	0.59562	-1.0369	1.0349	1.3049	-0.92792	0.62211	-0.069869	0.50378	1.5353	-0.85231	-0.70724	-0.35571	2.0699	0.35283	-0.40766	0.85212	-0.093609	-0.21094	1.6532	-0.20282	1.1468	0.57255	0.66327	0.21565	-0.47894
Goniatites hudsoni	Korn & Tilsley (2006, text-fig. 24B)	-0.15419	-1.0469	-1.0469	-0.33923	-0.51004	-0.36354	0.75972	0.36234	-0.24486	0.25332	0.63431	-0.73562	0.17387	-0.91383	-1.5368	-0.46929	0.86457	0.22097	-0.15859	0.80905	0.20285	0.13397	0.22427	0.2235	-0.17805	0.28498	-2.0969	-0.055808	0.47479	0.030032	-0.71002	-0.34999	0.5606	0.8142	-0.80633	-1.1146	-0.12726	-0.41954	-0.60095	0.28963	-0.45926	-0.45062	1.1842	-0.30967	0.41898	0.5191	-0.43936	0.69576
Goniatites hudsoni	Korn & Tilsley (2006, text-fig. 24C)	-0.193	-0.41186	-0.41186	-1.0019	-0.49202	0.15625	0.47271	0.20302	-0.097139	1.328	1.7177	1.1707	-0.57602	-0.74265	0.02467	-1.1386	-0.3247	0.19602	-0.11952	0.20487	0.20913	-1.5383	-0.47685	1.2578	-0.51902	0.84394	-0.10443	0.67525	-0.56881	0.517	-0.03185	-0.94971	-0.67668	0.23477	-0.66145	-0.5185	0.7648	-0.29524	1.7109	-1.4188	0.38654	-0.70057	0.23086	1.5443	1.2787	0.0075369	-0.88895	0.17298
Goniatites moorei	Korn & Tilsley (2006, text-fig. 26D)	-0.54543	1.0115	1.0115	-1.4239	-0.74117	0.37729	1.3645	0.17828	-1.114	1.1589	-1.1094	2.8798	-2.8337	-0.70627	-1.0477	0.12601	-0.29981	1.6356	-0.3076	-1.1061	-1.7515	-1.2039	2.2825	-1.9119	0.26107	-0.94932	-0.26983	-2.0268	-1.7775	-1.8613	-0.22871	-0.78377	2.0665	0.51459	-0.32716	-0.022368	0.83253	1.2203	-1.0115	-2.8385	-0.51103	-0.64066	1.2375	0.50503	-0.47161	0.69764	-1.4166	-0.54387
Goniatites moorei	Korn & Tilsley (2006, text-fig. 26E)	-0.88815	0.73228	0.73228	-0.21232	-1.0099	0.61276	1.1419	0.8661	-0.17703	-0.42438	-0.26675	1.9367	-0.57851	-0.91128	0.44239	0.49614	0.69576	0.017517	-1.0864	-1.7292	0.70701	-0.11062	-0.15385	-0.11745	1.5699	-0.59674	0.43961	1.6764	0.12698	0.54682	1.7221	3.6754	1.0758	-0.25415	0.20895	0.39355	-0.38996	-1.8073	-0.41774	-0.90554	0.44616	-0.56075	1.7195	-1.2868	2.1802	0.016505	-0.97633	0.83377
Goniatites moorei	Korn & Tilsley (2006, text-fig. 26F)	-1.8608	0.72462	0.72462	-5.4405	0.94057	0.61379	0.11134	-2.1904	-2.7442	0.035938	-2.896	-4.2262	1.3045	-0.53134	2.3192	-1.167	-1.4751	-2.6742	-1.829	-0.45514	0.13118	-2.6714	0.19833	0.36557	0.94858	0.99735	-0.22902	0.26393	-0.054529	-0.28836	0.74459	0.13236	1.0655	0.065183	-0.038992	-0.77784	-0.52201	0.13733	0.14413	0.068661	0.17752	0.42033	0.43281	-0.015231	-0.88959	0.44393	-0.15804	-0.30939
Goniatites rodioni	Klug et al. (2006, text-fig. 21F)	0.41058	-1.3005	-1.3005	-1.1376	0.23435	-0.16736	1.7289	1.344	0.12263	0.28863	0.21227	-0.33338	-0.5314	0.39244	-0.79276	-0.61952	0.4512	-0.43549	0.3151	0.98695	-0.12777	0.33094	1.4904	0.68343	0.99628	-0.32059	0.4986	-0.38428	0.73008	0.78289	-1.5991	-0.35297	0.11349	0.19271	0.2437	-0.8001	0.11402	-0.64273	0.71647	0.23376	-0.67401	-1.3209	-1.5865	-2.2034	-0.84332	-0.49394	0.21414	0.50617
Goniatites rodioni	unpubished	0.75012	-1.6038		-0.45617	0.92627	-0.60194	1.6795	1.1572	-0.71408	-0.28667	-0.51372	-0.33302	-1.471	1.3108	-0.88111	-0.11633	-1.595	-0.89957	0.12409	1.3193	0.40376	1.3926	0.58357	1.2343	1.2469	-0.33961	-0.043036	2.5743	0.077854	-0.7464	-1.9118	-0.69057	0.80403	-0.63617	-0.38677	0.57913	-0.014577	1.161	-0.30992	-1.1016	1.0828	-0.85108	0.080929	0.44015	0.30758	-0.96504	2.052	-0.64841
Goniatites sphaericus	Korn (1988, text-fig. 38A)	-1.1802	1.4949	1.4949	-3.5631	-0.71603	0.75418	0.41934	-1.0922	-0.63662	-0.32755	-3.402	1.8573	0.12573	-0.79722	0.54418	1.2219	2.2763	1.4145	-0.3311	1.6327	-1.1044	3.6627	-2.2825	-0.47724	-2.6646	-1.8449	-0.23242	0.6161	1.1047	1.6125	-2.0579	-1.246	-2.1822	-0.65105	-0.26463	1.671	-0.38031	-0.88886	-0.76203	-0.40002	0.050693	-0.57391	-0.72433	0.047207	0.65016	-0.47275	0.56285	0.88685
Goniatites sphaericus	Korn (1988, text-fig. 38B)	-1.1333	0.49599	0.49599	-2.0242	-0.36042	0.99361	-0.62804	-0.6129	0.023743	-1.408	0.35927	1.367	0.26957	0.32593	-0.12269	-0.18786	-0.21441	0.74119	2.1921	-0.53676	1.9044	2.7279	0.9323	-0.55302	0.1022	-2.5096	1.9094	-0.7273	0.33817	-1.6062	1.0901	-0.29636	0.71339	0.54124	-1.3897	-1.4	-1.9187	1.1065	1.4192	1.2614	-0.89525	1.549	0.96229	-1.6046	-1.2752	-0.82305	-0.62577	-0.75672
Goniatites stenumbilicatus	Klug et al. (2006, text-fig. 28B)	1.9129	-0.28058	-0.28058	0.31685	1.6574	1.7296	2.8519	-0.92605	0.54694	-1.9948	0.84003	1.0114	0.89826	-1.5373	0.20969	0.39147	-2.2181	-1.4602	1.5716	0.68062	-1.543	-0.77525	-1.3863	0.75929	0.080796	-1.1304	-0.50036	-1.0769	1.3938	-0.38707	0.45318	-1.2066	-0.4152	0.136	-0.56786	0.0074321	-0.086331	0.082679	-1.9848	-1.2962	-0.72682	0.7089	0.92496	0.68159	-0.17771	-0.36796	-0.28659	-0.59716
Goniatites stenumbilicatus	unpubished	1.9274	-0.05134		-0.23501	1.4552	1.8928	2.7577	-1.5959	1.0243	-1.5244	0.47248	1.4311	0.30299	-1.6284	-0.52989	0.87661	-1.2629	-1.4037	0.55848	1.447	-0.17586	0.038638	-1.2273	1.7429	1.6427	-0.38065	-0.10454	-1.439	0.76473	0.33273	-0.10149	-0.13628	0.20512	0.47227	-0.64882	-0.67896	0.78715	-0.35522	-0.16736	1.0652	0.39446	0.31358	1.0292	-0.028036	-1.176	0.40503	-0.31448	0.62231
Gourarites hagaraswad	Bockwinkel et al. (2010, text-fig. 40D)	0.24247	-1.8046		0.095692	1.0653	-1.1437	-0.22793	-0.089373	-1.7679	-0.14379	-1.5178	1.8521	1.9562	0.94777	-1.2907	2.0993	-0.70596	1.0717	-0.050156	1.9143	0.52869	-1.5497	-1.2746	-0.0075762	-0.14371	-0.95028	1.12	1.0944	0.81563	-0.29061	2.9556	-1.3186	0.59346	-1.2492	0.89308	-1.5998	1.9333	1.9332	1.5034	1.7449	0.55617	-0.55081	0.58674	0.1654	0.63945	0.094735	-1.0692	0.5397
Gourarites mustari	Bockwinkel et al. (2010, text-fig. 44F)	-0.69387	-0.4041		0.50311	-0.66466	-0.16884	0.21874	-0.45684	-1.101	0.65554	1.2469	0.82147	-1.1766	-0.64542	1.7554	-0.4451	-0.19712	-0.59588	-0.84851	0.29258	-0.6918	0.2717	-0.44018	0.95963	-0.2095	-0.23324	-0.9494	-1.0424	-0.28361	-0.25745	-0.086842	0.90632	1.1933	-0.88373	-0.13688	-0.76212	-0.45054	0.71662	-0.83453	-0.12746	-0.87801	-0.084404	-1.4949	-2.4849	0.58691	-0.948	-0.14558	-0.725
Hammatocyclus pollex	Ebbighausen et al. (2010, text-fig. 7J)	0.46429	-2.3717		-0.41131	1.5105	-1.5462	-0.80804	0.53843	-0.11036	-0.85752	-2.4659	1.6777	-1.8111	1.1917	-0.8831	1.6462	-2.7827	1.5132	-1.3374	-1.5748	3.03	-0.93147	-2.476	-0.21342	-1.3796	2.2044	-1.6545	-0.5132	0.48154	-1.152	0.6095	1.8138	-2.1419	2.1425	-2.4126	-0.13302	-1.1726	0.34609	-1.0866	-0.30311	0.023198	-1.0834	-1.5437	-1.1949	-0.50602	0.71765	0.81103	-0.49389
Hibernicoceras artilobatum	Korn & Ebbighausen (2008, text-fig. 44E)	0.43686	-0.40142		0.13443	-0.39287	-0.27982	-0.36532	1.4904	-0.16711	0.70305	-0.24389	-0.75075	0.70231	-0.47846	1.1171	-0.25348	0.05289	1.0676	1.4461	-0.11555	-1.7103	-1.5149	0.35263	-0.051166	-0.21113	-1.5665	-0.87929	-0.50929	0.76529	-0.38675	0.43892	0.062445	-1.8473	0.7029	0.1912	0.97439	-1.7423	0.32674	-1.1677	1.4317	0.63194	1.406	-0.29348	0.17996	-0.19971	0.4599	0.075155	-1.4191
Hibernicoceras carraunense	Korn & Ebbighausen (2008, text-fig. 40F)	0.88616	0.67317		0.79328	-0.43414	0.3106	-1.333	0.16311	-0.77889	1.0606	-0.26153	-0.52806	0.6585	0.46548	-0.22531	0.36832	0.43245	-0.61616	0.46566	-0.5345	0.57498	-0.18574	-1.6113	-0.072855	-0.37704	-0.27611	0.14365	1.9735	0.11443	-0.50486	0.46842	-1.0126	0.54248	0.94083	-1.05	-0.1723	1.112	-0.64702	-1.5978	-0.81409	0.12686	0.97231	0.60462	0.040912	0.018342	-0.035494	0.45861	-0.34722
Hibernicoceras touissitense	Korn & Ebbighausen (2008, text-fig. 42F)	0.75897	1.1011		1.0081	-0.90679	0.028411	-0.34998	0.08288	-0.67254	1.735	-0.28057	-0.45745	0.66545	0.086686	1.0507	0.24929	-1.5552	0.21309	0.6794	0.084167	0.41998	-0.28104	-1.9501	0.61567	-0.45408	-2.6012	0.74341	0.98576	-0.758	-0.20779	0.62757	-0.55257	0.34028	0.96552	0.65343	0.89439	1.3881	-1.4226	0.25371	-1.0895	0.29114	-0.14705	-0.24112	-1.7479	0.16509	1.6707	0.72844	-0.15432
Hypergoniatites fusiger	Klug et al. (2006, text-fig. 30D)	0.26476	-0.21684		-0.6942	-0.62059	0.13482	1.9565	1.8405	-0.50142	0.91857	0.75011	-0.44777	0.90567	-0.71054	-0.21936	0.040592	0.10579	0.76902	0.81997	0.21415	-1.0321	-1.2975	0.29722	-1.2353	-0.29	0.72818	-0.094508	-0.71564	0.65018	-0.93134	-0.82768	0.93324	-1.4459	1.1524	0.85818	-1.0972	-1.0235	-0.49998	1.6013	-0.22137	0.1443	0.0056208	-0.58353	0.45079	0.31925	-1.0523	-0.97443	1.0339
Itimaites parabolicus	Klug et al. (2006, text-fig. 10B)	1.7305	0.87271		1.183	-0.10143	1.3801	-0.67857	-3.5652	2.0339	-0.49604	-1.12	0.0091807	0.30313	-2.3571	-1.6321	-0.28448	0.8978	-1.3204	-1.2228	-2.8513	-0.212	-0.2796	0.55121	-0.21614	1.0235	-0.55447	-0.24041	-0.20081	-0.024642	-2.2342	-0.50929	-0.61494	-1.227	-0.71581	-0.44268	1.0724	-0.43979	1.3153	0.91363	0.74871	-0.89148	-2.3167	-0.1992	-0.76707	1.3816	0.38018	0.94278	-0.074397
Lusitanites circularis	Korn & Ebbighausen (2008, text-fig. 67B)	-1.129	0.45279		1.0473	-1.131	0.39507	1.0209	0.90678	0.020411	-0.95153	-0.76369	0.94334	0.15893	-0.58647	2.6894	0.5913	0.75336	0.0055451	-0.42053	-0.57058	0.23081	0.56885	0.015496	0.59528	1.1265	1.5083	0.72747	1.0636	1.2682	-0.99408	1.6962	-1.5445	-0.39386	1.1031	0.33868	0.95408	-0.92387	-0.88902	0.67694	0.81535	-0.89649	-0.47062	-0.43802	0.082678	0.73429	-0.1244	-0.0074756	-0.65081
Lusitanoceras zirari	Korn & Ebbighausen (2008, text-fig. 50F)	0.020773	1.6472		-0.22409	-0.31922	-1.3083	1.2965	0.74346	0.048754	-0.035164	-0.028435	0.84484	0.44445	0.81158	-0.58607	1.0525	-0.050125	-0.62446	-1.6615	-1.1443	-0.25291	-0.57276	1.4015	0.15371	-0.052302	-0.30754	-0.74031	-1.2099	1.9033	0.81126	0.053249	1.9047	-0.7826	-1.8903	1.4386	0.20475	-0.65286	2.432	-0.20119	-1.1109	1.3462	1.3849	-0.39639	-1.2933	-0.7326	-0.70262	1.7625	1.4703
Muensteroceras fabrei	Ebbighausen et al. (2010, text-fig. 21E)	-1.2375	-0.25599		1.3458	-1.1527	0.2232	1.1897	-0.19944	0.448	-1.6519	-0.37954	-0.87169	-0.42277	0.82005	0.20533	-0.12771	1.1666	-0.41557	-1.0944	0.10346	0.37429	0.041219	0.33272	0.35081	0.58792	0.39829	0.98931	0.094809	0.31415	0.98202	0.18475	-1.9255	-1.3013	1.6595	0.45267	-0.091649	-0.16836	0.39962	0.93768	-1.0256	-0.74888	0.5985	-0.068375	-0.99505	0.14213	1.9438	-0.15836	-0.82803
Neogoniatites worki	Klug et al. (2006, text-fig. 33B)	1.2475	1.4605		-0.92062	-0.66131	1.1118	1.1058	0.32905	-0.67069	0.25495	-0.9894	-1.175	-1.2406	0.49607	-2.7969	0.62743	0.52109	1.9802	-0.18499	0.37565	-1.1755	0.80335	1.2181	2.7586	-0.51517	1.0926	0.31948	0.002111	-1.9844	-0.91633	1.9966	0.56828	-1.4066	-1.5802	0.065175	-1.8539	0.37986	-0.73353	0.46165	0.4215	-0.89723	0.039752	-0.30477	0.045034	-0.055635	0.38168	1.2441	-1.4633
Paraglyphioceras celeris	Korn & Ebbighausen (2008, text-fig. 48D)	0.65537	1.1202		0.54623	-1.1968	0.20904	-0.59889	0.18753	-0.1588	1.2732	-0.65488	-0.35622	-0.19656	0.64605	-0.098615	0.61309	-1.4186	-0.15687	0.15175	-0.014245	0.17212	-0.024038	-0.68695	0.5172	-0.13456	0.061886	-0.25069	-0.19838	0.54009	0.54767	-0.40159	-0.98449	1.1119	0.19212	-0.37091	1.788	0.41943	-0.95548	-0.85805	0.19132	-0.60432	-0.12459	2.0711	-0.19577	-0.23971	0.35139	-0.23875	0.94608
Paraglyphioceras rudis	Korn & Ebbighausen (2008, text-fig. 46G)	1.2585	0.98686		0.63129	-0.43646	0.78154	-0.37608	-0.89128	-0.045923	0.86761	-0.74143	-0.73933	0.044668	-0.47814	0.32703	-1.3874	-0.11217	2.0933	0.62006	0.0074277	1.1546	0.77787	0.97124	0.12002	0.354	0.29667	-1.1637	0.3934	0.89912	-0.38521	1.0367	1.6969	0.52885	0.73256	-0.63722	1.1283	0.50962	0.074922	0.48833	-0.125	-0.45138	0.98521	0.5856	-0.69078	-1.1999	-0.53851	-0.59711	0.42194
Platygoniatites rhanemensis	Klug et al. (2006, 20% extended)	0.41361	1.607		-0.0062423	0.93241	-2.1201	0.98825	-0.69625	-0.58687	0.20573	1.9414	0.01972	0.10312	1.7541	0.25021	-0.48231	0.41879	-0.24308	-0.84972	-1.2249	0.99477	0.45161	-0.38786	0.83762	-0.3478	-0.88064	-0.78355	-0.61405	0.69702	0.05877	0.73996	-0.25197	0.90176	-2.1164	-0.77276	0.63984	0.26704	2.1225	-0.60218	-1.0772	-0.34315	1.3969	-1.1751	0.20059	0.85735	0.51999	-1.3065	-1.4651
Platygoniatites rhanemensis	Klug et al. (2006, text-fig. 41E)	1.3145	1.4		0.37505	0.40186	0.49762	0.72425	-1.6535	-1.2919	0.79546	0.89539	-0.17974	0.18011	0.28489	-0.36443	0.25404	0.97531	0.64998	-0.40849	0.88836	1.568	0.79535	1.7109	0.32867	-0.77871	1.885	-1.8961	0.24885	-0.18545	0.0016831	0.41297	0.33539	-1.003	0.67148	-0.13939	2.2381	-0.87593	1.9702	1.3675	1.1261	1.826	0.82514	0.0012287	-0.14924	0.52294	0.31936	-2.4902	-0.44108
Platygoniatites rhanemensis	Klug et al. (2006, text-fig. 41F)	-0.3329	1.4112		0.1288	1.2313	-2.5504	0.59322	1.3072	-0.76458	-0.65365	1.8123	0.99696	2.4862	0.0023392	-0.68061	-1.755	0.19743	-0.55034	-0.98778	-1.7826	1.4748	-0.89231	0.90477	0.80553	-0.25216	-2.688	-0.21999	0.82263	-0.39071	0.83886	0.29119	-0.29479	-1.1476	-1.3067	-1.6662	0.19193	-1.7123	-1.4246	0.32717	-0.44308	0.27894	-1.5397	1.005	1.0232	-2.7598	1.6659	1.6652	1.9451
Revilloceras bellornatum	Klug et al. (2006, text-fig. 37B)	1.4057	0.71064		0.36744	0.44546	1.1378	0.88367	-0.22413	-1.53	0.86615	0.61032	-0.14817	0.66886	0.015033	0.86014	1.426	1.0798	-0.55685	0.92217	0.60497	1.5054	0.28207	1.257	-1.6869	-0.17759	1.0229	-0.40238	0.80804	-1.661	1.6591	0.13288	0.25572	-0.059706	0.19415	0.061249	-0.069658	0.44472	1.196	-0.60436	0.6048	0.15188	-1.5902	-0.20447	-0.98794	-0.76236	-0.75731	1.3104	-0.55167
Revilloceras bellornatum	unpubished	1.4964	0.64281		0.61717	0.55971	1.1162	0.74953	-0.12323	-1.6005	0.32628	0.55926	-0.22417	0.76526	-0.20674	0.60571	1.2409	1.1572	-1.0403	0.9585	0.6431	1.1054	0.18596	0.98338	-2.065	-0.36039	0.64594	0.06768	1.3798	-1.7799	1.4315	0.0074315	-0.12805	-0.30951	-0.065852	-0.63768	0.31557	0.56793	1.3263	-0.8938	1.202	-0.31089	-1.4203	-1.1498	-0.52301	-1.5765	-0.39188	0.7348	-0.2246
Revilloceras granofalcatum	Klug et al. (2006, text-fig. 35F)	1.6477	0.56699		0.42974	0.86422	1.2306	-1.3552	0.25177	-0.93664	-1.5523	-0.038678	-0.29857	-0.64625	-1.255	0.039517	-0.47345	0.26513	1.2497	-0.72704	0.96069	-0.20308	-0.72902	1.6726	0.39165	-1.6019	-0.50137	2.8889	-0.78835	1.9676	2.2715	1.058	2.1346	1.879	0.017183	0.45926	-0.70502	0.34579	-0.78873	-0.95062	-1.256	1.5761	-0.30957	-0.76772	0.050817	1.0822	1.9133	1.4582	1.68
Revilloceras granofalcatum	unpubished	1.2484	-0.67419		0.24013	0.77272	0.18678	-0.31041	0.93336	0.34327	-0.93926	-0.48776	-0.8197	-1.671	-0.12241	1.326	-1.0353	-0.56462	0.10117	-0.57207	-1.5001	-1.2373	1.4879	1.0975	-0.70608	-2.4696	-0.039232	-0.34346	0.12169	0.32939	1.6722	2.5972	-0.0438	-0.099829	0.042805	-0.20819	0.073766	0.66203	-0.72515	1.6867	1.3346	-0.19913	-1.1957	1.8436	1.5346	-1.4346	-0.65415	-1.297	0.098995
Semibollandites qawiy	Bockwinkel et al. (2010, text-fig. 53C)	-0.82185	-0.74642		0.37221	-0.25634	-0.14086	0.87481	-0.60044	-1.6129	0.96848	1.4827	0.57711	-1.172	-0.39233	1.4546	0.23118	-0.12902	0.38886	-1.1766	-0.23392	-0.25341	0.34035	-0.33354	0.3741	1.0916	-1.2035	-1.1211	-0.44842	-0.064057	-0.18163	-0.50424	0.87328	0.87049	0.42469	-1.6118	0.37506	-0.13696	-0.027987	0.79076	1.6141	-0.93358	-0.71417	-0.90739	0.045407	1.8058	1.9178	-0.30256	0.80952
Semibollandites qawiy	Bockwinkel et al. (2010, text-fig. 53D)	-2.4464	0.7391		0.94889	3.6639	1.8779	-0.29971	0.90842	2.362	3.518	1.2324	-1.0623	-1.4462	-1.6134	0.33812	0.71545	-1.385	0.58895	-4.2455	1.5391	0.76445	0.84941	1.0034	-0.9678	0.45116	-1.4994	1.1245	0.75337	0.9764	-1.6082	0.80322	-1.3468	-1.5932	-0.34072	-0.46359	-0.17737	-0.024185	-0.79822	-0.99347	0.49678	0.63612	-0.098719	-0.86563	1.1031	-1.0892	-1.4188	-0.10565	0.13809
Semibollandites qawiy	Bockwinkel et al. (2010, text-fig. 53F)	-1.4723	0.84514		1.6221	0.24108	0.27809	0.86149	1.1941	-1.4964	0.10004	-1.6612	1.3742	-1.1581	-1.2349	0.95696	-0.67401	1.0262	-0.081297	1.2893	-3.0342	0.15071	-0.61083	-0.66898	2.2924	-0.068164	0.52284	1.0676	0.42238	-0.58315	-0.00037994	-2.4051	-0.039521	1.0611	-0.12126	-0.75017	0.095858	0.62969	0.7197	0.87933	2.5415	2.5662	-1.026	0.83756	2.295	-1.4035	-2.2707	0.63082	-1.6559
Sudeticeras fornicum	Klug et al. (2006, text-fig. 15B)	1.4745	0.44697		0.87856	0.96838	1.0609	-2.7194	-0.50786	-0.99699	-1.6699	-0.40191	0.55811	0.86062	-0.29793	-0.65616	-0.46186	1.4882	0.62225	-1.6938	-0.19409	0.61665	-1.8132	0.001129	-0.36137	-0.12885	0.81935	1.1732	-0.014504	-0.098115	-0.62193	-2.3798	-0.36699	0.28944	-1.7223	-0.37967	0.37296	-0.58726	-1.6157	-0.89611	-0.032757	-1.1582	-0.29956	-1.3131	-0.24103	0.16754	0.23931	-2.2843	-0.12699
Sudeticeras fornicum	Klug et al. (2006, text-fig. 15C)	-0.32901	0.83882		1.1385	-1.8878	-0.11566	1.0421	1.5357	-0.092822	-0.28622	-1.3001	0.2463	1.59	-1.061	0.047004	-1.3683	-1.2108	-0.24099	-1.0156	0.94737	-0.57725	0.5237	-0.40634	-3.417	-0.66445	0.61607	-0.92493	-0.46001	0.6679	0.28408	-0.41622	0.10819	-0.62744	-2.2151	-1.407	-2.0558	1.708	0.59439	0.55809	-1.0421	0.19457	-0.74928	-0.92136	-0.26668	-0.88619	0.94705	-0.88502	-0.49056
Sudeticeras horoni	Korn & Ebbighausen (2008, text-fig. 62D)	0.063021	1.4712		-0.30776	-0.21447	-1.561	-1.307	-0.10772	1.0822	-0.9896	0.60438	0.43194	-0.044952	1.2562	0.28434	2.1317	-0.25658	-1.075	0.13244	0.24197	-0.9213	0.034843	0.57015	-0.52095	1.6161	-0.71805	-0.36224	0.96419	1.8305	0.76037	0.58562	-0.35634	0.23274	1.3477	1.5008	-0.5039	-2.0316	0.51146	0.12334	-0.50525	0.88451	-1.2432	-1.2218	0.79165	-0.76756	0.1263	-2.57	-0.94434
Sudeticeras ibnbajjahi	Korn & Ebbighausen (2008, text-fig. 56G)	-0.66016	1.54		-0.32894	0.0019158	-1.616	0.063976	0.80333	1.5252	-1.7816	-0.75251	1.499	1.7075	-0.75708	1.1761	0.52161	1.0302	-0.26198	0.24758	1.6556	1.5539	0.73711	1.6516	1.0154	0.45934	1.3123	-1.1204	0.037277	-0.87178	-2.8656	0.48894	0.56108	1.3494	1.0876	0.50852	-0.59663	0.059745	-2.1438	-0.9069	0.19741	0.68576	2.1155	-1.092	1.5738	0.83812	-1.6699	0.12821	1.1205
Sudeticeras murracaoense	Korn & Ebbighausen (2008, text-fig. 53F)	0.31078	1.3713		0.35019	-1.0664	-0.95304	-0.79446	-0.2829	1.4795	-0.17494	-0.49971	-0.23535	-0.53823	0.64524	1.102	0.64415	-1.8741	-0.41759	0.079716	0.59785	-0.042829	0.23488	0.50925	0.74147	-0.54671	0.35715	1.018	-1.4757	-0.21585	0.07263	-1.0115	0.012498	0.5728	0.33903	1.1697	-0.19753	-0.14111	1.4101	-1.0661	1.0669	-1.394	-1.1653	0.58445	-0.13563	-0.050984	0.099309	1.0648	-1.0498
Sudeticeras occultornatum	Klug et al. (2006, text-fig. 19E)	-0.36206	1.0952		0.099744	-1.4003	0.14094	-1.6709	0.49217	0.11766	-0.51586	-0.8565	1.7786	-0.32116	0.030418	-1.1523	-0.060315	-1.6202	-1.1489	-0.64676	1.8187	-1.4275	-0.35851	1.336	-0.2679	1.6193	-0.89278	-1.3856	2.5316	-1.6927	2.5766	0.84667	0.43344	-0.76227	1.4263	-1.8761	-0.40822	-0.58286	0.30237	0.85003	0.43672	-1.6327	0.34528	-0.29883	1.4508	-0.47612	0.16207	-0.54567	-0.55712
Sudeticeras occultornatum	Klug et al. (2006, text-fig. 19F)	0.46991	1.4218		0.24781	-1.0453	-0.65232	-0.31181	0.62541	1.24	-0.21929	-0.69682	-0.89121	0.42417	0.27834	0.74181	0.60369	-2.0753	1.2638	0.49962	0.091694	-0.66369	-0.30575	-0.77511	-1.3458	0.94879	-1.1836	-0.13037	-0.071398	-0.78286	-0.43638	-1.0543	0.32793	1.3197	0.61389	-0.47501	0.8628	-0.8619	0.53804	0.07037	2.0152	-0.28001	-0.87351	0.19996	0.71525	0.22945	1.9202	-0.99074	0.91618
Sudeticeras pusillobatum	Klug et al. (2006, text-fig. 17C)	0.48376	1.7894		-0.54126	-0.43158	-1.2873	0.70891	-0.49169	1.1616	-0.56468	-0.099069	-0.71389	-0.63489	1.347	-0.60977	0.44237	-0.33248	0.76786	-1.1313	0.1242	-1.2484	0.28487	-0.651	0.35575	0.87224	0.12666	-0.024196	-0.81032	-1.6869	0.78572	0.2807	-1.2423	-0.8119	-0.83778	0.78619	0.15711	-0.91813	-0.014708	-0.58243	-0.95868	2.3215	0.41664	-1.0467	2.3957	1.6732	-0.20645	0.86684	-1.4172
Sudeticeras pusillobatum	Klug et al. (2006, text-fig. 17D)	0.75471	1.6301		-0.0078386	-0.27149	-1.0568	0.70169	-0.50596	0.69947	-0.16186	0.46929	-1.3872	-0.27992	0.90566	-0.31931	-0.26141	-0.73067	1.2304	-0.26392	-0.30203	0.36483	0.5134	-0.84072	0.63783	-0.22071	-0.12255	-0.52632	-0.89118	-0.93427	0.13031	0.11971	-1.5116	0.71998	-0.5847	0.24906	-0.66559	0.35129	-1.021	-0.030095	0.90061	0.78355	-0.41495	-0.30401	-0.97079	-0.23225	-0.73756	-1.1561	0.03049
Sudeticeras pusillobatum	unpubished	0.7885	1.5867		0.11417	-0.24225	-1.039	0.66533	-0.39729	0.64346	-0.20534	0.54023	-1.5362	-0.12739	0.82359	-0.40719	-0.4198	-0.75207	1.1996	-0.046884	-0.41475	0.62808	0.49404	-0.89789	0.46766	-0.36927	-0.27245	-0.42307	-0.65394	-0.79146	-0.061938	0.065498	-1.3161	0.91024	-0.37785	0.10569	-0.69423	0.58388	-1.3149	-0.13759	1.4207	0.31077	-0.40905	-0.3225	-1.7226	-0.86713	-0.60245	-1.5674	0.40345
Sudeticeras splendens	Korn & Ebbighausen (2008, text-fig. 58B)	-0.46365	1.3338		0.73908	-0.41366	-1.7383	0.72897	1.0887	1.1317	-1.1353	-0.49191	0.87365	1.7267	-0.75698	1.3587	-1.6318	-0.75098	-0.92123	-0.28448	0.74989	2.2981	-0.76213	1.4842	0.34655	-1.1191	-0.074554	0.72141	0.20936	-1.5679	-1.1028	-0.85912	-0.36545	-1.0579	0.8213	0.44059	-1.23	1.3772	-0.7733	-0.82179	-0.056555	-0.76177	-1.0578	0.55199	-1.5335	1.4948	0.062388	0.61065	-1.6008
Timimounia lunula	Bockwinkel et al. (2010, text-fig. 58E)	-1.5158	0.46378		1.9524	0.24246	0.44311	-0.79061	-0.22853	-2.2574	0.6589	-1.9914	1.2993	-3.3505	-0.03822	-1.399	-2.4113	-0.2007	-1.833	2.6152	0.94795	2.2849	-0.89302	-0.086515	-1.256	1.6776	0.15502	-0.21426	-2.1435	-0.52985	0.62879	1.4493	-2.381	-1.1901	-1.1154	2.6641	0.39429	-1.7926	-0.82025	-1.6771	0.37264	1.2018	1.0308	0.041666	-0.39622	-0.30086	0.41067	-0.23633	2.1783
Trimorphoceras absolutum	Ebbighausen et al. (2010, text-fig. 31C)	-0.24229	-1.4819		0.091824	-1.0103	-0.89155	0.2685	-0.75223	1.6151	-0.053994	-0.54938	-1.3349	-0.68686	-2.0635	-1.2443	0.28998	0.84911	-0.61074	0.42147	-0.53133	0.55109	0.69794	0.82016	-0.57159	-0.097346	-0.26468	-1.8657	0.57993	0.7117	0.93628	0.10334	0.037297	1.1777	0.49372	-0.47955	-0.5397	1.1858	-1.2127	-1.6939	-0.29031	1.0126	-0.17264	-0.22009	-0.014781	-1.3743	0.62481	0.82937	-0.63199
Trimorphoceras azzelmattiense	Korn et al. (2010, text-fig. 10B)	-1.1328	-0.921		0.83486	-0.83815	-0.088456	0.7002	-0.9878	0.33299	-1.4198	0.31555	-1.5237	-0.27085	0.71417	0.4249	1.424	-0.59626	1.2146	0.27903	0.12512	0.21414	-0.42446	1.0916	-0.71157	1.3357	1.0563	0.86325	0.34948	0.49667	1.5292	-0.44336	-1.4034	0.30589	0.72478	-0.048329	2.0348	0.3958	-0.08508	-0.74823	-1.7696	-0.094426	-0.58425	-1.9994	0.10205	-1.3132	-0.11394	-0.75264	1.3308
Trimorphoceras crassilens	Ebbighausen et al. (2010, text-fig. 30I)	-0.68468	-0.91166		0.77117	-1.3333	-0.59278	0.38414	-1.4543	1.0272	0.089143	0.25209	-0.32468	-1.6744	-0.9973	-0.037667	-1.1482	0.26302	-1.4208	-0.76442	0.80344	0.14025	1.2574	-0.69913	1.0728	-1.0996	0.23182	-0.90005	0.48739	0.1718	0.84856	-0.4787	0.41417	1.1812	0.26626	0.3229	-0.69311	0.12275	0.6666	0.7114	1.0625	-0.98347	0.42227	-0.69567	0.6405	0.35736	2.7399	0.67448	0.77058
Trimorphoceras crassilens	Ebbighausen et al. (2010, text-fig. 30J)	-1.8871	-0.39232		0.87769	0.33608	1.5596	1.836	-0.97151	2.0369	-0.67729	-0.24771	-0.66128	-0.60786	3.4006	-0.35597	-0.71038	2.3251	0.20232	-0.3203	1.8693	0.73289	-3.0098	-0.7479	-1.1338	-1.7086	-1.6178	-1.4577	0.19689	-0.61178	-0.12768	0.57365	1.8838	0.47248	-0.30879	1.5638	0.88619	0.10195	-0.33802	-0.41591	0.043953	-2.0077	-0.81092	2.1121	1.0008	-0.025396	-0.74006	-0.11049	-1.8898
Trimorphoceras crassilens	Ebbighausen et al. (2010, text-fig. 30K)	-0.036746	-1.9257		0.20938	0.206	-0.9592	0.062347	-2.6399	1.4103	1.4674	-1.0065	1.8666	2.2078	0.55287	0.26861	0.69481	-0.68614	0.11554	-0.48644	-2.2774	-1.4024	-0.032717	1.2932	0.35986	-0.74122	1.1913	0.61747	-0.23894	-1.0585	1.8553	0.65273	-0.93955	-0.21319	-0.81142	0.66645	0.58159	-0.032927	-1.525	-0.64115	-0.28748	-0.34749	0.60095	1.0508	0.020738	-0.21178	-0.87569	-0.6945	1.08
[truncated: 64 more columns]

## Sheet: values EL
Var-covar	Eigenvalue	% variance
1	0.0579211	49.058
2	0.0367666	31.14
3	0.00755149	6.3959
4	0.00504791	4.2754
5	0.00358996	3.0406
6	0.0017809	1.5084
7	0.00123649	1.0473
8	0.000775976	0.65723
9	0.000610272	0.51688
10	0.000458018	0.38793
11	0.000414302	0.3509
12	0.000291508	0.2469
13	0.00025188	0.21334
14	0.000178032	0.15079
15	0.000156847	0.13285
16	0.000130331	0.11039
17	0.000112719	0.09547
18	0.000101288	0.085788
19	8.37863e-05	0.070965
20	6.46735e-05	0.054777
21	6.02584e-05	0.051037
22	5.42604e-05	0.045957
23	4.78607e-05	0.040537
24	4.38504e-05	0.03714
25	3.70962e-05	0.03142
26	3.04615e-05	0.0258
27	2.73196e-05	0.023139
28	2.49699e-05	0.021149
29	2.16676e-05	0.018352
30	2.0291e-05	0.017186
31	1.77648e-05	0.015046
32	1.64872e-05	0.013964
33	1.40078e-05	0.011864
34	1.24858e-05	0.010575
35	1.05491e-05	0.0089348
36	9.87884e-06	0.0083671
37	9.1651e-06	0.0077626
38	8.54633e-06	0.0072385
39	8.10254e-06	0.0068626
40	6.57409e-06	0.0055681
41	6.33757e-06	0.0053678
42	5.70191e-06	0.0048294
43	5.24033e-06	0.0044384
44	4.9524e-06	0.0041946
45	4.42151e-06	0.0037449
46	4.04648e-06	0.0034273
47	3.61603e-06	0.0030627
48	3.15898e-06	0.0026756
49	2.84652e-06	0.0024109
50	2.63294e-06	0.00223
51	2.21557e-06	0.0018765
52	2.1229e-06	0.001798
53	1.65114e-06	0.0013985
54	1.47388e-06	0.0012483
55	1.29111e-06	0.0010935
56	1.23458e-06	0.0010457
57	1.15909e-06	0.00098172
58	9.51333e-07	0.00080575
59	8.23117e-07	0.00069716
60	7.27742e-07	0.00061638
61	6.41127e-07	0.00054302
62	5.75629e-07	0.00048754
63	5.09738e-07	0.00043173
64	4.58319e-07	0.00038818
65	3.64385e-07	0.00030863
66	3.17148e-07	0.00026862
67	2.84578e-07	0.00024103
68	2.38347e-07	0.00020187
69	2.12131e-07	0.00017967
70	1.91917e-07	0.00016255
71	1.68776e-07	0.00014295
72	1.53838e-07	0.0001303
73	1.3695e-07	0.00011599
74	1.30217e-07	0.00011029
75	1.05628e-07	8.9464e-05
76	9.54771e-08	8.0867e-05
77	8.1379e-08	6.8926e-05
78	6.52614e-08	5.5275e-05
79	5.58291e-08	4.7286e-05
80	5.04009e-08	4.2688e-05
81	4.41102e-08	3.736e-05
82	3.8863e-08	3.2916e-05
83	3.48401e-08	2.9509e-05
84	3.00062e-08	2.5414e-05
85	2.28719e-08	1.9372e-05
86	1.93179e-08	1.6362e-05
87	1.63705e-08	1.3865e-05
88	1.32647e-08	1.1235e-05
89	1.11037e-08	9.4046e-06
90	8.58168e-09	7.2685e-06
91	6.80857e-09	5.7667e-06
92	6.27498e-09	5.3147e-06
93	5.33944e-09	4.5224e-06
94	3.92726e-09	3.3263e-06
95	2.38256e-09	2.018e-06
96	2.3202e-09	1.9652e-06
97	1.90702e-09	1.6152e-06
98	1.33658e-09	1.132e-06
99	6.52119e-10	5.5233e-07
100	5.26017e-10	4.4552e-07
101	4.85652e-10	4.1134e-07
102	3.19628e-10	2.7072e-07
103	1.59993e-10	1.3551e-07
104	1.21595e-10	1.0299e-07
105	9.24011e-11	7.8261e-08
106	5.21862e-11	4.42e-08
107	1.9479e-11	1.6498e-08
108	5.11377e-12	4.3312e-09
109	8.61221e-13	7.2943e-10
110	1.9186e-13	1.625e-10
111	2.78091e-34	2.3554e-31
112	0	0
113	0	0
114	0	0
115	0	0
116	0	0
117	0	0
118	0	0
119	0	0
120	0	0

## Sheet: Fourier coeff VL saddle
species	source
Ammonellipsites conradae	Ebbighausen et al. (2010, text-fig. 18B)	-0.584883	-0.178597	0.450439	-0.882736	0.0647162	-0.0699189	-0.051465	-0.0821526	0.0124347	0.10482	-0.0216667	-0.00389494	0.011913	0.00364713	-0.0102701	0.052187	0.000973649	0.00250331	-0.0128165	-0.00367444	-0.00579023	-0.0159235	0.0143242	-0.00583591	0.00956685	-0.00450197	-0.000368551	-0.00466677	-0.00282437	0.00749113	0.00419566	0.000703561	-0.000174764	0.000766916	-0.00569079	0.00623834	-0.00231375	0.00248951	-0.00143275	-0.00351731	5.51898e-05	-0.00588964	0.00238064	3.73783e-05	0.00253642	0.000897019	0.000175775	-0.00174129
Ammonellipsites menchikoffi	Ebbighausen et al. (2010, text-fig. 16B)	-0.542723	-0.1092	0.33929	-0.935516	0.0226489	-0.0740072	-0.0654955	-0.0470487	0.0632596	0.0942307	-0.0304758	0.0053621	0.00308669	0.00598084	0.0212102	0.0431666	0.0020342	-0.00333843	-0.0115834	0.00769352	-0.0154693	-0.00368727	0.0034274	-0.0177411	0.000907517	-0.00795525	0.000326959	0.00047058	0.00928288	0.00535356	-0.00080752	-0.00263441	-0.00154188	0.00277819	0.00461002	0.00461291	0.000287541	0.000379536	-0.00425554	0.00296082	-0.00386281	0.000962427	-0.000360043	-0.00377119	6.07408e-05	-0.00438031	0.000899516	0.00030247
Ammonellipsites menchikoffi	Ebbighausen et al. (2010, text-fig. 16C)	-0.564777	-0.31149	0.539087	-0.840396	0.105639	-0.0486933	-0.0411351	-0.121504	-0.0115878	0.104205	-0.0101156	0.0032288	0.0120762	0.00474991	-0.0454024	0.0396926	-0.0122854	0.0136518	-0.00217202	-0.00323142	0.00970769	-0.0233864	0.0120144	0.00256761	0.00163848	0.0075949	0.0108839	-0.00609133	-0.00504503	-0.00200869	-0.00024525	0.00489832	-0.0030904	0.00681296	-0.00761054	-0.0046313	-0.00165435	-0.00670097	-0.000327324	-0.000414807	0.0039498	0.000402474	4.65882e-05	-0.000440567	-0.00089835	0.000455361	0.00337479	0.0043751
Arnsbergites arnsbergensis	Korn (1988, text-fig. 48B)	-0.701638	-0.226961	0.451659	-0.874814	0.0956434	-0.103567	-0.0880124	-0.135324	-0.00861623	0.101767	-0.0037644	-0.0100216	0.0277833	0.0103483	-0.00428977	0.0582332	-0.0241964	0.0237134	8.46886e-05	0.00372222	-0.0105409	-0.0194106	0.0075725	0.00114811	0.000701688	-0.00550736	-0.00482683	-0.0186759	0.00289122	-0.00572418	0.00307966	-0.000543366	0.0100137	0.00744259	-0.00556165	0.00354697	-0.00283825	0.0033971	0.00288158	0.00572523	-0.000919025	-0.000224612	-0.00223827	0.00149584	-0.0049624	-0.00246876	0.00286218	-0.00419023
Arnsbergites ferrus	Korn & Ebbighausen (2008, text-fig. 31G)	-0.688378	-0.275347	0.512385	-0.839426	0.139803	-0.0986835	-0.0596212	-0.151255	-0.0267148	0.0716954	-0.00669617	-0.0151507	0.0273592	0.0271538	-0.0297528	0.060789	-0.0178429	0.0136804	0.00135721	0.00520986	-0.00863746	-0.0203096	0.00369473	0.00347396	-0.000588016	0.00499749	0.0102403	-0.0173133	0.00464493	-0.00371988	0.00507227	-0.00108089	0.000668804	0.0096045	-0.00591271	-0.00208324	-0.00631988	-0.000882452	-0.00443502	0.00643291	-0.000152456	6.57452e-05	-0.00358619	0.000361981	-0.00192149	-0.00597289	0.00513032	0.000684083
Arnsbergites proiecturus	Korn & Ebbighausen (2008, text-fig. 35C)	-0.77985	-0.2678	0.399154	-0.909008	0.122364	-0.082135	-0.0789792	-0.156451	-0.0171063	0.0864385	0.00313911	0.00238598	0.0493845	0.0217671	-0.00702724	0.0613499	-0.0254095	0.00910649	0.00243343	0.000539566	-0.0106796	-0.0145271	-0.00403522	0.00204366	-0.00114066	-0.00138027	0.00300147	-0.0183727	0.00476273	-0.00743231	0.00184191	0.00146271	0.00633269	0.0114489	-0.000187243	0.00105755	-0.000197657	-8.18323e-05	0.00057616	0.00646975	-0.00224736	0.00277564	-0.00447893	-0.00104111	-0.00273331	-0.00344148	0.00172675	-0.00153314
Arnsbergites rufus	Korn & Ebbighausen (2008, text-fig. 38B)	-0.606844	-0.317529	0.582093	-0.801771	0.196333	-0.0520352	-0.0117088	-0.168109	-0.0501891	0.0569439	-0.0150777	-0.014091	0.00956152	0.0262256	-0.0578866	0.0445493	-0.0275815	-0.0107224	-0.00400786	0.0061326	0.0134635	-0.0187596	0.00471331	0.0118703	0.00592677	-0.00280795	0.0244964	-0.00360947	-0.0012492	-0.00348103	0.000632533	0.00051626	-0.0133599	0.00894575	-0.00316691	-0.00620601	0.000715846	-0.00391942	-0.0058273	-0.00224516	0.00127469	0.00110813	-0.000484554	-0.00271932	0.00447798	0.000476707	0.000336387	0.00629479
Arnsbergites sphaericostriatus	Korn & Ebbighausen (2008, text-fig. 28D)	-0.524213	-0.204465	0.419986	-0.906554	0.0891814	-0.0951255	-0.0737137	-0.0799	0.0207245	0.0930113	-0.0281477	-0.00201135	0.00379313	0.0105057	0.00115476	0.0625771	-0.00341273	0.000358625	-0.00549611	0.0002587	-0.0155634	-0.0131674	0.0151451	-0.011085	0.0115473	-0.00759795	-0.00329692	-0.00910723	-0.000671442	0.00750332	0.000552683	-0.0024535	0.00136689	0.00294773	-0.00435585	0.0107554	-0.00113479	0.00399557	-0.0012076	8.60009e-05	-0.00265816	-0.00633733	0.0035588	-0.000826361	0.0033113	-0.000322465	-0.000162228	-0.00412418
Arnsbergites warslowensis	Korn & Ebbighausen (2008, text-fig. 26C)	-0.659747	-0.242049	0.440086	-0.891832	0.14294	-0.146059	-0.112477	-0.142384	0.0102188	0.0794234	-0.0181535	-0.0136942	0.0440091	0.0110872	-0.00429413	0.0693477	-0.0125066	0.0199077	0.00674098	0.00654839	-0.0198078	-0.0152789	0.00822876	0.00331921	0.000878526	-0.00220701	-0.00327433	-0.0209002	-0.00197376	-0.00837399	0.000454016	-0.004043	0.0121363	0.00779454	-0.00549245	0.00353548	-8.25216e-06	0.00337169	0.00368245	0.00644245	0.000921069	8.06739e-05	-0.00160677	0.00360957	-0.0061808	-0.00117486	0.00238958	-0.00398695
Benimehlalites belkassemensis	Bockwinkel et al. (2010, text-fig. 32C)	-0.904087	-0.250744	0.395064	-0.799155	0.0577065	-0.101104	-0.10488	-0.161278	-0.00613315	0.0758808	0.0271465	-0.0139393	0.0696551	-0.00517958	0.00144731	0.0246488	-0.0138373	0.0352457	0.00177118	0.00615549	0.00357713	-0.000306084	-0.00990145	0.0109232	-0.0140769	0.0116368	-0.00528042	-0.00723623	-0.00197366	-0.0116379	0.00130438	-0.000918885	-0.0024182	0.00219976	0.00253207	-0.00622029	0.00134366	-0.00628582	0.00446181	0.00357233	0.00232287	0.00463486	-0.000288285	0.000667642	-0.00150679	-0.00177933	-6.3841e-05	0.00338018
Benimehlalites benimehlalensis	Bockwinkel et al. (2010, text-fig. 30B)	-0.859787	-0.39046	0.444288	-0.889692	0.115006	-0.0179696	-0.0441755	-0.172051	-0.0175364	0.0745236	0.0277253	0.0173543	0.0542122	0.0339286	-0.0254851	0.0315127	-0.0273196	0.00603209	-0.00963854	0.00201707	0.0153921	-0.00345823	-0.0124439	-0.00601231	-0.00430549	-0.00501879	0.00882275	-0.00758043	0.0124813	0.00396412	0.0025843	0.00469313	-0.00607261	0.00323952	0.00429594	0.00382041	0.000526581	0.000565324	-0.00601052	0.00235875	-0.0051754	-0.00275807	0.000315896	-0.0036724	0.0043923	-0.0021438	-0.000782561	-0.00176309
Bollandites nitens	Bockwinkel et al. (2010, 20% extended)	-0.852189	-0.318253	0.498046	-0.736691	0.0664239	-0.0877366	-0.0639901	-0.165401	-0.0305272	0.0681964	0.0332279	-0.00909475	0.055541	0.0209873	-0.0125419	0.0253383	-0.0211497	0.026714	0.000513294	0.0039073	0.00224475	-0.00286575	-0.0154829	0.000470693	-0.0138173	0.00562872	0.00105291	-0.00893819	0.00680032	-0.00866	0.000992873	0.000592494	-0.00199657	0.00409081	0.00588205	-0.000673079	0.00385828	-0.00307643	-0.000544716	0.00491378	-0.00287055	0.00526517	-0.00106103	-0.000296613	0.000452144	-0.00343331	-0.00257674	0.000571718
Bollandites nitens	Bockwinkel et al. (2010, text-fig. 15E)	-0.889066	-0.404819	0.451934	-0.850547	0.098722	-0.00605759	-0.0098387	-0.173265	-0.039719	0.0550867	0.0263227	0.0275005	0.0433792	0.0426508	-0.0260552	0.0237401	-0.0311973	-0.00215816	-0.0105739	-0.00125409	0.0113009	0.0075028	-0.00751064	-0.0109103	-0.00465382	-0.00700862	0.0114967	-0.00412113	0.00755177	0.00908233	-1.3645e-05	0.00387882	-0.00652666	-0.000609487	0.000242827	0.00529728	8.86727e-05	0.00233815	-0.00643378	-0.00147575	-0.00302629	-0.00586396	0.0018714	-0.00206021	0.0042235	0.000835265	0.00128215	-0.00163274
Bollandites nitens	Bockwinkel et al. (2010, text-fig. 15G)	-0.807264	-0.175075	0.404145	-0.859938	0.0400839	-0.10523	-0.100153	-0.122814	0.0204278	0.0906741	0.0153387	-0.0179316	0.0443761	-0.00946766	0.0022201	0.0425981	0.00626002	0.0313739	-0.00370101	0.00223937	-0.0124063	-0.00823932	-0.00512365	0.00708871	0.00200917	0.00733208	-0.0074055	-0.0083858	-0.00662992	-0.00708377	0.00623323	-0.00232748	0.00795013	-8.16848e-05	0.000828006	-0.00145206	-0.00337334	0.00187527	0.00439507	0.00145815	0.00386026	-8.08251e-05	-0.00291622	0.00339361	-0.00331606	0.00318012	-0.000943977	-0.000736801
Bollandoceras mirrih	Bockwinkel et al. (2010, text-fig. 25D)	-0.876298	-0.39992	0.464464	-0.849398	0.152486	-0.0232205	-0.0100473	-0.201552	-0.0334412	0.0512328	0.00446449	0.0159674	0.0632947	0.0693658	-0.0316947	0.0365686	-0.0148971	-0.0002719	-0.00869093	-0.000169594	0.00823121	0.00888451	-0.0116847	-0.0100183	-0.00512805	-0.00706002	0.0128753	-0.0048901	0.00812254	0.00824436	0.000884688	0.00322251	-0.00368015	-0.000494243	0.00351074	0.00661257	0.000604914	0.00405103	-0.00573892	-0.00169483	-0.00389436	-0.00394606	0.0010586	-0.00205705	0.00279834	0.00217313	0.000443477	-0.00268701
Bollandoceras mirrih	Bockwinkel et al. (2010, text-fig. 25E)	-0.908676	-0.225021	0.319112	-0.91748	0.0929052	-0.0733179	-0.0985813	-0.146781	0.0206617	0.0744584	0.0260414	-0.00146174	0.071179	-0.00791573	-0.00320989	0.0388971	-0.00677048	0.0313197	-0.00638086	0.00630334	0.00516878	-0.00521071	-0.00958594	0.00708045	-0.00724101	0.0104645	-0.0019728	-0.0120437	-0.000333197	-0.00895411	0.00597016	-0.00186139	-0.000256808	0.00629706	0.00245105	-0.00347772	-0.000908245	-0.00311247	0.00334082	0.00548397	0.00102832	0.00388865	-0.0036368	0.000619227	-0.00228319	-0.00274444	-0.000101647	0.000788876
Calygirtyoceras zrigatense	Klug et al. (2006, text-fig. 12)	-0.872305	-0.318916	0.441028	-0.840486	0.116905	-0.0760152	-0.0440331	-0.183187	-0.0282351	0.0439216	0.00868465	0.01272	0.0668605	0.0196286	-0.0280522	0.0426112	-0.00937821	0.00457325	-0.00525821	0.00860623	0.0172188	-0.0105086	-0.00978677	-0.00496995	-0.00746567	-0.000548696	0.00803816	-0.00887684	0.0109936	-0.00112406	0.00159349	0.00291377	-0.0060505	0.00541833	0.00264014	0.00283472	0.00222948	-0.000948228	-0.0045363	0.00261593	-0.00591473	0.000937904	-0.000295201	-0.00350437	0.00326992	-0.00360283	6.48576e-05	-0.00176224
Dzhaprakoceras dzazairense	Ebbighausen et al. (2010, text-fig. 42L)	-0.856914	-0.229815	0.380695	-0.885643	0.0488513	-0.0467608	-0.0875357	-0.0956745	0.0198335	0.0812332	0.0282658	-0.029598	0.029894	0.00446996	0.00211347	0.0391024	-0.00840115	0.0270695	-0.0106749	-0.000925821	-0.0131828	-0.00501636	-0.00458127	0.0122528	0.00434915	-0.00290905	-0.00570085	-0.0100131	-0.0039856	-0.00884511	0.00617831	-0.00286631	0.010073	0.00173905	-0.000844782	-0.00060771	-0.00135868	0.00326613	0.00485831	0.00195816	0.00149202	0.0017783	-0.00317743	0.00387796	-0.00436092	0.00172034	-0.000654295	-0.00171526
Eoglyphioceras minutum	Korn & Ebbighausen (2008, text-fig. 6B)	-0.888781	-0.37776	0.43706	-0.869059	0.0866951	0.00064903	-0.0497856	-0.141765	-0.0199023	0.0658843	0.0425659	5.93779e-05	0.0230572	0.0279462	-0.0246925	0.0327472	-0.0313825	0.0106872	-0.00395934	0.00216286	0.0034942	-0.0127086	-0.0130262	-0.00216735	-0.00208444	-0.00406443	0.00855986	-0.0103598	0.0110824	-0.00179003	0.00149796	0.00295043	-0.00161402	0.00969899	0.00425851	0.00155372	-0.000144568	-0.000132902	-0.00469971	0.00371304	-0.00572701	0.000865519	-0.00176476	-0.00337646	0.00200248	-0.00498931	-0.00106422	-6.87349e-05
Eurites commutatus	Ebbighausen et al. (2010, text-fig. 25G)	-0.815218	-0.13291	0.333706	-0.903296	0.00508194	-0.105779	-0.117919	-0.096554	0.0399737	0.0883821	0.0167563	-0.0186712	0.0261712	-0.0206918	0.0193222	0.038649	0.0124111	0.0274991	-0.00246158	0.00112296	-0.0201203	-0.00207458	-0.00305317	0.0067207	0.00614289	0.00164249	-0.0117706	-0.0027092	-0.00841493	-0.00350052	0.00318684	-0.00517168	0.00790408	-0.00694672	0.000562684	-0.000492397	9.41528e-05	0.00446636	0.00387092	-0.00204456	0.00217596	-0.002333	0.00123137	0.00453094	-0.000256999	0.0051728	-0.00194508	0.000313591
Eurites pondus	Ebbighausen et al. (2010, text-fig. 26C)	-0.82474	-0.255625	0.374113	-0.915544	0.0440803	-0.0554965	-0.071013	-0.107219	0.00600381	0.0924253	0.0281014	0.00321027	0.0241319	-0.0110406	-0.00543006	0.0432087	-0.0227036	0.0256547	-0.0105809	-0.00271232	-0.00414182	-0.0181879	-0.00286143	0.000752052	-0.00148422	0.00147912	-0.00137669	-0.0122259	0.0025741	-0.00410449	0.00945579	0.00240003	0.00454472	0.00598042	-0.00167625	0.00160326	-0.00543147	0.00200526	0.000598784	0.00310573	0.000160159	0.000294024	-0.00524758	-0.000827697	-0.00332601	-0.00197383	0.00169405	-0.00272098
Eurites temertassetensis	Korn et al. (2010, text-fig. 8F)	-0.837591	-0.274342	0.348794	-0.934117	0.0464692	-0.0551576	-0.083595	-0.0978572	0.0175709	0.0712976	0.0299365	-0.00101099	0.0182383	-0.00775798	-0.00103178	0.0490296	-0.00995912	0.0236732	-0.00508101	-0.00250332	-0.0123104	-0.0176207	-0.00505699	0.000252756	0.00138788	0.00266986	-0.00437862	-0.012617	-0.00023592	-0.00608618	0.00858645	0.00154085	0.00731968	0.00415059	0.000208906	0.00217906	-0.00492879	0.00137296	0.00168592	0.00312205	0.000510436	0.000512976	-0.00521922	0.000872661	-0.00307592	-0.000421107	0.000758648	-0.00329555
Girtyoceras ibnkhaldouni	Korn & Ebbighausen (2008, text-fig. 10C)	-0.603198	-0.461745	0.501873	-0.853459	0.118457	-0.0658713	-0.0352298	-0.144074	-0.0485657	0.0664216	-0.00957683	0.0448282	0.0351227	0.0256744	-0.0405265	0.0389805	-0.0159986	-0.015159	0.00692702	-0.0018655	0.0173549	-0.0173277	0.00713356	-0.0105291	-0.00901577	0.0012142	0.0102568	-0.00178102	0.00627658	0.00830029	-0.00775475	0.00584283	-0.00783884	0.000386401	-0.00318435	-0.000122974	0.00523264	-0.00332542	-0.00185246	-0.00198382	-0.000638703	-0.0020013	0.00559666	-0.00121196	0.00335167	0.00174323	-0.000946131	0.00254832
Girtyoceras luscinia	Korn & Ebbighausen (2008, text-fig. 8D)	-0.862604	-0.35613	0.357177	-0.931703	0.0645216	-0.137741	-0.147282	-0.114755	0.011558	0.0513665	0.0241883	0.00376724	0.0555926	-0.0128294	0.0180474	0.0545111	-0.00770121	0.0217427	0.0147242	-0.00348506	-0.0171274	-0.00477353	-0.00881257	0.00490992	-0.00544256	0.0128998	-0.0108641	-0.0117266	-0.00211897	-0.0112825	0.000380392	0.00018518	0.00843474	0.000499833	0.00105043	-0.00440861	-0.000623964	-0.00374578	0.00586352	0.0022334	0.00474536	0.00526149	-0.00138233	0.00201223	-0.00394686	0.00166954	0.000715263	0.00200957
Goniatites americanus	Korn & Titus (2011, text-fig. 42B)	-0.922888	-0.310017	0.384965	-0.756601	0.0665831	-0.0967073	-0.103845	-0.163508	-0.0237266	0.0414014	0.02564	-0.0152482	0.0735034	0.00371702	0.00323585	0.02698	-0.0161804	0.0156668	0.00909579	0.00567663	0.00613934	0.0057948	-0.0119005	0.0136627	-0.0126634	0.00427054	-0.00172034	-0.00698035	0.00142554	-0.00828895	-0.00559892	-0.000699034	-0.00186267	0.00122554	0.0037377	-0.0074844	0.00608049	-0.00448434	0.00140495	0.00193692	0.000108624	0.00533902	0.00284706	-0.000584964	0.00183977	0.000221036	-0.000341488	0.00441136
Goniatites americanus	Korn & Titus (2011, text-fig. 42C)	-0.708216	-0.251811	0.501801	-0.836701	0.123187	-0.0673014	-0.0445005	-0.145446	-0.0292366	0.0822787	-0.00328162	-0.0135135	0.027886	0.0255947	-0.0313883	0.0546163	-0.0162533	0.00652356	-0.00449827	0.000459207	-0.0026885	-0.0226164	0.00105624	0.00459009	0.00404664	0.000702827	0.0103345	-0.012658	0.00470776	-0.0056378	0.00560014	0.00271923	-0.00156758	0.00829724	-0.00577185	-0.0012676	-0.00522701	-0.000896033	-0.00291948	0.00419891	0.000452213	-0.000463866	-0.00330996	-0.00226749	0.000399161	-0.00323796	0.00511281	0.000662044
Goniatites americanus	Korn & Titus (2011, text-fig. 43G)	-0.520771	-0.131019	0.379839	-0.920514	0.0469661	-0.135531	-0.0733096	-0.0746875	0.0375322	0.0948978	-0.0331277	0.00715812	0.00954152	-0.000868419	0.0160711	0.0569366	1.0852e-05	0.00334364	-0.00854585	0.00541413	-0.0128743	-0.00503308	0.0119216	-0.0181314	0.00250285	-0.0111713	-0.00612703	-0.00644694	0.00502026	0.00929442	-0.000662892	-0.00229072	-0.000977143	-0.000749313	0.00172087	0.0105057	0.000475103	0.00432674	-0.00206066	0.00240813	-0.00515865	-0.00219352	0.00326421	-0.00450569	0.0011223	-0.003457	-0.00168724	-0.00225317
Goniatites americanus	Korn & Titus (2011, text-fig. 43H)	-0.671092	-0.234202	0.499099	-0.844307	0.1394	-0.0940605	-0.049575	-0.14711	-0.0177616	0.0711944	-0.00989786	-0.00897891	0.0258743	0.00936653	-0.033585	0.0572401	-0.016592	0.0146622	-0.00525814	0.00646236	0.00511204	-0.0195464	0.00839119	0.00403141	0.00783305	0.000834622	0.0104698	-0.017148	0.00293087	-0.00460616	0.00349312	-1.96777e-05	-0.000105695	0.009733	-0.00871142	-0.000536119	-0.00574559	-0.00102013	-0.0041901	0.00571372	0.00224354	-0.000623153	-0.00185867	-0.000112372	-0.000602435	-0.00354764	0.00654861	0.000110801
Goniatites americanus	Korn & Titus (2011, text-fig. 43I)	-0.699502	-0.182924	0.425162	-0.883518	0.130657	-0.12185	-0.0812698	-0.135314	0.00218137	0.0699568	-0.018035	-0.0170834	0.0358846	0.0138737	-0.00627561	0.0697487	-0.00711788	0.0190665	0.000414998	0.00538185	-0.0166816	-0.0105456	0.00809205	0.00241246	0.00309426	-0.000729506	-0.00149012	-0.0199919	-0.00218341	-0.00508324	0.00336844	-0.0055013	0.00781407	0.00527022	-0.0062013	0.00432804	-0.00150954	0.00521756	0.00230421	0.00625375	0.000184118	-0.00155952	-0.00193764	0.00361908	-0.00371481	0.000548382	0.0025097	-0.00415762
Goniatites americanus	Korn & Titus (2011, text-fig. 43J)	-0.680473	-0.26289	0.414235	-0.907978	0.125404	-0.132166	-0.0802947	-0.120368	-0.0188638	0.0519087	-0.00865145	0.000591933	0.0155136	0.0190845	-0.00725028	0.0766971	-0.00235164	0.0146541	0.0104753	0.00128901	-0.0155486	-0.0275601	0.00577169	-0.0085355	-0.00157826	0.000723585	-0.00467909	-0.019362	0.000621444	-0.000812181	0.00237444	0.00263446	0.00895358	0.00651832	-0.00391945	0.00702311	-0.00555623	0.000796371	0.00371241	0.00539584	-0.000296922	-0.00151852	-0.0015511	-0.00112277	-0.00308461	-0.00175352	0.00199001	-0.00646449
Goniatites crenistria	Korn (1988, text-fig. 33A)	-0.607054	-0.329148	0.517007	-0.854801	0.17229	-0.0624151	-0.027478	-0.168064	-0.052586	0.0643861	-0.0163621	0.0179913	0.014886	0.0203078	-0.047454	0.049131	-0.0287208	-0.00669316	0.0036286	0.00723586	0.0151835	-0.017346	0.0114444	-0.00180303	-0.000172799	0.00409931	0.0194471	-0.00921634	0.00392758	0.00217341	-0.00472966	-0.00050208	-0.0108229	0.00617535	-0.00780198	-0.00296	0.00210417	-0.00598579	-0.00714261	0.00180247	0.00147945	0.000150679	0.00391623	0.00101249	0.00522266	-0.00154852	0.00380265	0.00462184
Goniatites crenistria	Korn (1988, text-fig. 33B)	-0.660845	-0.230695	0.45058	-0.882966	0.143935	-0.128369	-0.0718242	-0.134762	-0.00461283	0.0547753	-0.0143543	-0.00106359	0.0234706	0.000213675	-0.0196987	0.0702073	-0.0158208	0.0154477	0.00145978	0.00707985	-0.00909247	-0.0183099	0.0115036	-0.00137839	0.00291518	0.00302075	0.0038907	-0.0215304	0.00237337	-0.000691968	0.00280942	-0.00157826	0.00742612	0.00710088	-0.00873222	0.00283742	-0.00557306	9.84427e-05	-0.00171294	0.00706399	0.000158484	-0.00209774	-0.00168622	0.00172009	-0.00324954	-0.00183555	0.00630946	-0.00350115
Goniatites crenistria	Korn (1988, text-fig. 33C)	-0.674215	-0.258381	0.51382	-0.837018	0.176981	-0.121473	-0.0520317	-0.164166	-0.0238	0.043919	-0.0118338	-0.0114005	0.0212673	0.0118844	-0.0397965	0.0634935	-0.0198198	0.0170312	0.00053496	0.0143835	0.00328053	-0.0228919	0.00767354	0.00389822	0.0010462	0.000839882	0.0136605	-0.0186334	0.00482584	-0.00508476	0.00332184	-0.00225333	-0.000539352	0.0110864	-0.0071692	-0.00217681	-0.00435211	-0.00219511	-0.00626798	0.00713017	1.71437e-05	0.000313957	-0.0028905	0.000654728	-2.0022e-05	-0.00574693	0.00583562	0.00169551
Goniatites crenistria	Korn (1988, text-fig. 33D)	-0.724086	-0.247812	0.536056	-0.789414	0.165253	-0.0915724	-0.0302102	-0.177051	-0.0302202	0.052385	-0.00404368	-0.0203311	0.0293632	0.0200359	-0.0442409	0.0486024	-0.025381	0.0157081	-0.00751083	0.0135674	0.00586572	-0.018083	0.00171407	0.00886567	-0.00242056	-0.00159807	0.0169838	-0.0124434	0.00717423	-0.00520774	0.00643841	-0.000425447	-0.0026164	0.0097149	-0.00157251	-0.00521574	-0.00344254	-0.00133163	-0.00834191	0.00300478	-0.0019594	0.00311372	-0.00410182	-0.00153861	0.00147617	-0.00577449	0.00174226	0.00344011
Goniatites crenistria	Korn (1988, text-fig. 33E)	-0.762487	-0.218964	0.507975	-0.785395	0.179696	-0.112075	-0.0318372	-0.193781	-0.0269133	0.0376594	-0.00683117	-0.0231463	0.038824	0.0124778	-0.0399579	0.0522435	-0.0255866	0.0151137	-0.00729561	0.0191729	0.00342119	-0.0157721	-0.000808571	0.0125052	-0.00294727	-0.00224482	0.0170204	-0.0141093	0.00789267	-0.00895681	0.00634684	-0.00441731	-0.000195907	0.00988581	-9.0938e-06	-0.00574586	-0.000906647	-0.000247874	-0.0079966	0.00458915	-0.00277608	0.00436917	-0.00558898	0.000129666	-0.000660306	-0.00556086	0.000232424	0.00356441
Goniatites crenistria	Korn (1988, text-fig. 34A)	-0.88073	-0.192223	0.449079	-0.629304	0.113126	-0.124582	-0.0811747	-0.215226	-0.0348233	0.0312833	-0.00452595	-0.0416822	0.0691873	0.00767935	-0.0163221	0.0167269	-0.00843298	0.0279946	0.00777619	0.0212755	0.0108924	-0.00237562	0.000289548	0.0179819	-0.0205621	0.00482537	0.00415355	0.00100934	-0.00314072	-0.0126748	-0.00275085	-0.00259843	-0.00806529	0.000691271	0.000560896	-0.00742017	0.00660313	-0.00719854	-0.000677036	-0.00223984	0.0023345	0.00483211	0.00107055	-0.00183038	0.00496986	-0.00112279	-1.37837e-05	0.00299215
Goniatites crenistria	Korn (1988, text-fig. 34B)	-0.759178	-0.217043	0.491843	-0.80878	0.126785	-0.092447	-0.0533677	-0.176581	-0.0293593	0.0760168	0.000362979	-0.0153807	0.0354837	0.0146888	-0.0279696	0.0502128	-0.024407	0.0171108	-0.00410551	0.0135136	0.000103561	-0.0224786	0.000104131	0.00779856	-0.00337826	-0.00321595	0.00979687	-0.0157031	0.00436972	-0.00833753	0.00488507	-0.00175476	0.00115011	0.0124699	-0.000877919	-0.00292766	-0.00214895	0.000686954	-0.0035872	0.00580669	-0.000654098	0.00325622	-0.00429785	-0.000555408	-0.00191604	-0.00679083	0.00108856	0.000731821
Goniatites crenistria	Korn (1988, text-fig. 34C)	-0.73172	-0.146062	0.419075	-0.866741	0.0930084	-0.151854	-0.0841174	-0.140525	-0.0190057	0.0688908	-0.0133339	-0.0111543	0.0289582	0.00203218	0.00261745	0.0672968	-0.00241511	0.0205741	0.00435491	0.00713781	-0.0137194	-0.0182232	0.00693747	-0.000637002	0.00161597	-0.000490031	-0.00804779	-0.0191075	-0.00227247	-0.00464712	0.00125213	-0.00377759	0.0108788	0.00407096	-0.00382432	0.0053197	-0.00229282	0.00284874	0.00502416	0.00568532	-5.80136e-05	-0.00138225	-0.000403941	0.00381503	-0.00604368	0.000742933	0.000596193	-0.00495194
Goniatites crenistria	Korn (1988, text-fig. 34D)	-0.795237	-0.162356	0.416918	-0.845966	0.119471	-0.131084	-0.105933	-0.156825	0.000492467	0.0586528	-0.0103153	-0.0302965	0.0452718	0.00507716	-0.00412131	0.0592895	-0.00241111	0.0330661	0.0105994	0.0126463	-0.0110809	-0.00957435	0.00706286	0.00961502	-0.00709539	0.00311866	-0.00597689	-0.0184507	-0.00559768	-0.00936279	-0.00166687	-0.00521202	0.00977294	0.00201951	-0.0056172	-0.00266386	0.00255429	0.00042575	0.00524732	0.00585513	0.00519755	0.00180409	5.21723e-05	0.00398137	-0.00530299	0.00253054	0.00317563	0.000270969
Goniatites crenistria	Korn (1988, text-fig. 34E)	-0.741162	-0.192768	0.446076	-0.857256	0.113089	-0.138667	-0.0889073	-0.156034	-0.00491568	0.0672655	-0.00627305	-0.0124558	0.0382242	-0.00388254	-0.0108793	0.0623285	-0.01206	0.0236263	0.00320399	0.013368	-0.0116023	-0.017555	0.0057594	0.00534056	-0.00141389	0.00243468	-0.000358411	-0.0200763	-0.000181731	-0.00924317	0.00270077	-0.00575484	0.00925923	0.00589805	-0.00522531	-0.000237333	-0.00210897	0.00101444	0.00137379	0.00807183	0.00211103	0.00195748	-0.00262277	0.00490998	-0.005406	-0.00197979	0.00336774	-0.00181309
Goniatites crenistria	Korn & Ebbighausen (2008, text-fig. 18C)	-0.676045	-0.368221	0.528516	-0.845881	0.164916	-0.10751	-0.0519359	-0.151557	-0.0502795	0.0348496	-0.00383503	0.000247205	0.00544537	0.0319986	-0.0359039	0.066102	-0.0222502	0.00943326	0.0120464	0.00694491	0.00703626	-0.0219758	0.00623521	-0.00377316	0.00379145	-0.0028978	0.0127351	-0.0200103	0.00646598	-0.00181315	-0.00440177	0.000417673	-0.00336642	0.0121205	-0.00759585	0.00107541	-0.00259107	-0.00145495	-0.00545808	0.00851082	0.000450407	-0.000691888	0.00233129	-0.0015783	0.00224106	-0.00687978	0.00596578	0.000492919
Goniatites deceptus	Korn & Titus (2011, text-fig. 48D)	-0.924119	-0.306273	0.38196	-0.756912	0.0661442	-0.097342	-0.105377	-0.163208	-0.0232457	0.0417352	0.025223	-0.0154966	0.0738151	0.00259213	0.00353918	0.0267082	-0.0158108	0.0157502	0.00930065	0.00579709	0.00624044	0.00570915	-0.011722	0.0140032	-0.0122517	0.00472453	-0.00168951	-0.00681582	0.00132386	-0.00846754	-0.00573906	-0.00067218	-0.00195265	0.00144318	0.00329653	-0.00763345	0.00608438	-0.00450169	0.00152105	0.00184354	0.000370262	0.00517695	0.00291125	-0.000681292	0.00170846	9.21029e-05	-0.00028143	0.00444606
Goniatites deceptus	Korn & Titus (2011, text-fig. 48E)	-0.584585	-0.191524	0.491406	-0.856804	0.094421	-0.115325	-0.0608526	-0.123592	-0.0112415	0.11365	-0.018903	-0.00646043	0.0204597	0.0117363	-0.0155393	0.0578122	-0.00976833	0.0156753	-0.00775582	0.000763953	-0.00631812	-0.0206486	0.0140211	-0.00204592	0.00717544	-0.00265233	0.00034029	-0.0141605	-0.00238088	0.00315885	0.00500682	0.000821461	0.00388097	0.00588732	-0.00857513	0.0047011	-0.00555754	0.00258924	-0.000328857	0.00164407	0.000812091	-0.00592781	-0.000682948	0.000894287	0.000107172	-0.000295923	0.00404129	-0.00363889
Goniatites deceptus	Korn & Titus (2011, text-fig. 48F)	-0.671212	-0.228461	0.461535	-0.873227	0.125849	-0.12557	-0.0701002	-0.143363	-0.0191581	0.0813236	-0.0161822	-0.00788276	0.03581	0.0173971	-0.0127961	0.0680457	-0.0119488	0.0115432	-0.000755685	0.0024233	-0.00911903	-0.0188053	0.00721956	0.00216467	0.00458657	-0.00335268	0.00171634	-0.0210921	-0.00176606	-0.00321115	0.00297799	0.000174761	0.00647519	0.00981011	-0.00555611	0.00388005	-0.0047358	0.002705	0.00044748	0.00584801	0.00157432	-0.00206451	-0.00208819	0.000562384	-0.00386313	-0.00287527	0.00361511	-0.0046332
Goniatites deceptus	Korn & Titus (2011, text-fig. 50E)	-0.596079	-0.218462	0.470919	-0.874511	0.15446	-0.0976656	-0.0518208	-0.151816	-0.0291451	0.0841948	-0.0174312	0.00612073	0.0145603	0.00883296	-0.0321712	0.0629277	-0.0169083	0.00378203	0.00215117	0.00576766	-0.0014818	-0.0309447	0.0114556	-0.00173555	0.00439613	0.00606053	0.0108046	-0.0158894	6.71554e-05	0.000810061	0.00105797	0.00091255	-6.29696e-05	0.0113815	-0.00954813	0.000183041	-0.00506943	-0.0044665	-0.00362501	0.00439289	0.00498439	-0.00340531	-7.0549e-05	-0.000448167	-0.000789602	-0.00354091	0.0062729	0.000485029
Goniatites deceptus	Korn & Titus (2011, text-fig. 50F)	-0.616172	-0.168219	0.413582	-0.900503	0.0966386	-0.143114	-0.0729769	-0.133306	-0.0138557	0.107944	-0.0161671	0.0109153	0.0249681	0.00604487	-0.000494228	0.0637518	-0.010303	0.0171704	-0.00294216	0.00132469	-0.0113817	-0.0228623	0.0103328	-0.00938801	0.00446706	-0.00236287	-0.0058097	-0.0157819	-0.00170798	4.9189e-05	0.00379934	0.00169045	0.00632644	0.00671412	-0.00480027	0.00943982	-0.00417707	0.00282418	0.00278657	0.00216157	-0.000169559	-0.00489542	-0.00117902	-0.0007778	-0.00159013	-0.00175503	0.00111146	-0.00653913
Goniatites deceptus	Korn & Titus (2011, text-fig. 50G)	-0.56952	-0.187793	0.458682	-0.880486	0.141037	-0.137801	-0.0574581	-0.134192	-0.024131	0.0892121	-0.0291204	-0.00549867	0.0210895	0.0192554	-0.0150044	0.071558	-0.00602057	0.00240235	-0.0021733	0.00115214	-0.0125394	-0.0236606	0.0135522	-0.00114651	0.0103545	-0.00152967	0.00328958	-0.017596	-0.00224474	0.00198553	0.00253081	-0.00110108	0.00404508	0.00719019	-0.00942495	0.00535414	-0.00566841	0.0020777	-0.000572322	0.00394126	0.00165271	-0.00797644	-0.000362325	0.0014583	-0.00157614	-0.000706532	0.00474051	-0.00411318
Goniatites eganensis	Korn & Titus (2011, text-fig. 53B)	-0.653112	-0.0744617	0.371019	-0.898992	0.0971084	-0.147721	-0.0939266	-0.137698	0.0210141	0.102219	-0.0210262	-0.00212584	0.032908	-0.00308049	0.0109894	0.0616207	0.000509279	0.0209947	-0.00107966	0.0108602	-0.0225276	-0.0159451	0.00965802	-0.00543561	0.0013796	-0.00309868	-0.0103478	-0.0132851	-0.00106076	-0.00177964	0.00294481	-0.00635737	0.00993759	-0.000300196	-0.00244079	0.00700357	0.000731539	0.00736826	0.00356586	0.00319161	-0.00243468	-0.00273783	0.000505547	0.00346205	-0.00371824	0.0021515	-0.00191123	-0.00428181
Goniatites eganensis	Korn & Titus (2011, text-fig. 53C)	-0.59919	-0.118964	0.334042	-0.935858	0.106384	-0.0970836	-0.0712595	-0.10279	0.0122088	0.101344	-0.0210874	0.011049	0.0210602	0.0092001	0.00912065	0.0657746	-0.00437201	-0.00131162	-0.00510545	-0.00291451	-0.0218933	-0.0171573	0.00752105	-0.011101	0.00870949	-0.00189544	-0.00501498	-0.00992812	0.00252551	0.00694763	0.00407114	-4.8571e-05	0.0063918	0.00269021	-0.0015308	0.00914117	-0.00414179	0.00400016	-0.00131383	-0.000952913	-0.00278593	-0.00559427	0.000395599	-0.000266793	0.00084676	-0.00166508	-0.0011925	-0.00378921
Goniatites eganensis	Korn & Titus (2011, text-fig. 53D)	-0.5848	-0.116094	0.363554	-0.922251	0.0643068	-0.130985	-0.081271	-0.0929708	0.0252558	0.10574	-0.02726	0.00279251	0.0190127	0.00436436	0.021479	0.0585962	-0.00598971	0.0114534	-0.00800076	0.0036853	-0.0153086	-0.00684924	0.0100758	-0.0133647	0.00193389	-0.01401	-0.0108096	-0.0085563	0.00291796	0.00663076	0.00124326	-0.00212042	0.00585352	-0.0013665	0.00284596	0.0102215	0.000606755	0.00600816	0.000138929	0.00110041	-0.00553567	-0.00105266	0.00199541	-0.0016366	0.000423714	-0.00271259	-0.0043304	-0.00339355
Goniatites eganensis	Korn & Titus (2011, text-fig. 54C)	-0.734692	-0.297087	0.549393	-0.787966	0.0988692	-0.127957	-0.0477077	-0.174206	-0.049767	0.0873072	0.00163375	-0.00759961	0.048412	0.0199026	-0.0218247	0.0472956	-0.0262293	0.00963999	-0.00709057	0.00412728	0.00196682	-0.0181613	-0.00102082	0.00688549	-0.00404772	-0.0032006	0.00741711	-0.016071	0.00648646	-0.0045499	0.00486734	0.00458334	0.00153572	0.00815111	0.000544101	-0.00337259	-0.00405106	-0.00067247	-0.00420043	0.00614599	-0.00158806	0.00231507	-0.00297164	-0.00287972	-0.00228247	-0.00482015	0.00118891	0.00117925
Goniatites eganensis	Korn & Titus (2011, text-fig. 54D)	-0.697299	-0.22658	0.509467	-0.824024	0.164111	-0.0925039	-0.0437291	-0.166859	-0.0260089	0.0692933	-0.0133922	-0.0229726	0.0337182	0.0231636	-0.0316275	0.0592698	-0.0228604	0.00920736	-0.0074715	0.00746198	-0.000823652	-0.0175248	0.00442207	0.0117613	0.00344831	-0.00357026	0.0131031	-0.0175218	0.00376736	-0.00376886	0.0060092	-0.000388926	0.000846936	0.0103981	-0.00461411	-0.00463731	-0.00553843	0.00129766	-0.00495455	0.00515067	-0.000272095	0.000471488	-0.00521996	5.7929e-08	-0.0010807	-0.00404181	0.00406145	0.00157157
Goniatites eganensis	Korn & Titus (2011, text-fig. 57E)	-0.687332	-0.260686	0.536607	-0.811292	0.102798	-0.0895422	-0.0397016	-0.155392	-0.0516787	0.102811	-0.00228279	-0.00649737	0.0304388	0.023246	-0.0272474	0.0492241	-0.0245771	0.00518356	-0.00672878	-0.0028219	0.0036911	-0.0212786	0.00172655	0.00419578	0.00385263	-0.00176462	0.00834386	-0.0143191	0.00161137	-0.00214308	0.00292908	0.00652551	-0.00117373	0.0101593	-0.00336555	-0.000475249	-0.00595591	-0.00409066	-0.002442	0.00345313	4.18502e-05	-0.000600706	-0.00162775	-0.00324591	0.000253662	-0.00327823	0.00442011	-3.92641e-05
Goniatites eganensis	Korn & Titus (2011, text-fig. 58C)	-0.605808	-0.191899	0.388946	-0.918037	0.104065	-0.135206	-0.0832029	-0.101572	0.000345878	0.0869471	-0.0243511	-0.00603252	0.0252986	0.0229439	0.0115039	0.0697104	-0.000491066	0.00463272	-0.000737682	-0.00163534	-0.0240216	-0.0125845	0.00769381	-0.00888967	0.00786158	-0.00432402	-0.0092582	-0.0122547	0.00250565	0.000967959	0.00267483	-0.0026066	0.00430556	0.00218837	-0.00143321	0.0104548	-0.00153014	0.00959716	0.00307837	0.00119264	-0.0031009	-0.00472005	0.000914845	-0.000501771	-0.000908875	-0.00108199	-0.0033358	-0.00548676
Goniatites evelinae	Klug et al. (2006, text-fig. 26D)	-0.494051	-0.178369	0.503633	-0.856513	0.113384	-0.148379	-0.0527352	-0.109679	-0.0235377	0.0875331	-0.0326006	-0.00448858	-0.00239867	0.000652161	-0.0161802	0.0641271	-0.00961235	0.00532955	-0.00550003	0.00331666	-0.00598545	-0.016964	0.0224987	-0.00298559	0.0140371	-0.00141371	0.00367788	-0.0141043	-0.00604718	0.00644765	0.00137323	-0.00384166	0.000218194	0.00380197	-0.0116619	0.00514908	-0.00423115	0.00158825	-0.00265492	0.00101531	0.00335995	-0.0073567	0.00264177	0.00365436	0.00386976	0.000930621	0.00447255	-0.00254884
Goniatites gerberi	Klug et al. (2006, text-fig. 24F)	-0.578785	-0.202221	0.454464	-0.884366	0.113902	-0.138361	-0.0648922	-0.107896	-0.0234321	0.0771281	-0.0267694	-0.00397392	0.0109463	0.0140763	-0.00288439	0.0697462	-0.00661256	0.00795082	-0.00287424	0.000611185	-0.00719367	-0.0175102	0.0156906	-0.00796609	0.00910965	-0.00140443	-0.00384292	-0.0165072	0.00118733	0.00566293	0.00180009	-0.00209338	0.00194707	0.00466119	-0.00791531	0.00969478	-0.0048117	0.00259709	0.000550604	0.00293759	-0.00135024	-0.0059791	0.00207673	0.00126977	0.00245484	-0.000938964	0.00238643	-0.00633387
Goniatites gerberi	unpubished	-0.586499	-0.160821	0.399454	-0.910037	0.0957481	-0.153197	-0.076356	-0.0991862	-0.00850667	0.0795711	-0.0278527	0.00108561	0.0131651	0.0108099	0.0137197	0.0680518	-0.00286188	0.0101499	-0.00284314	0.00192052	-0.0129484	-0.0142592	0.0119648	-0.0135931	0.00716428	-0.00534663	-0.0100302	-0.0131057	0.00329441	0.00437678	0.000595986	-0.00271513	0.00382637	0.00295394	-0.00170017	0.0124899	-0.00235162	0.00492903	0.00198872	0.00195889	-0.00484866	-0.00363667	0.00253348	-0.000516428	0.000985992	-0.00229016	-0.00249357	-0.00634224
Goniatites gerberi	unpubished	-0.71741	-0.286341	0.516847	-0.830019	0.143318	-0.0576677	-0.0342099	-0.14915	-0.0328332	0.0694195	-0.00535262	-0.0195671	0.0275947	0.0402479	-0.0391277	0.0566331	-0.0118373	0.0064941	-0.00167275	-0.000122546	-0.00281582	-0.0195107	-0.00129626	0.00371843	0.000776417	0.0042254	0.0132339	-0.0107259	0.00385429	-0.00342659	0.00584834	0.0023411	-0.00574776	0.00857579	-0.00496266	-0.00208493	-0.00520912	-0.0014036	-0.00388035	0.00386678	0.000221421	-0.000625444	-0.0027351	-0.00320419	0.00111582	-0.00443491	0.00390801	0.00152143
Goniatites globostriatus	Korn & Ebbighausen (2008, text-fig. 25)	-0.676336	-0.398823	0.550441	-0.83233	0.145624	-0.0937406	-0.0591226	-0.147557	-0.0356294	0.0481732	-0.000894006	-0.00242694	0.0163245	0.0327079	-0.0379158	0.0606055	-0.02251	0.00594783	0.00986094	0.00603535	-0.00364642	-0.0219804	0.00533613	-0.000763021	-0.00305666	0.000457325	0.0153885	-0.0164126	0.00638888	-0.00160536	-2.76853e-05	0.000719384	-0.00186035	0.00986548	-0.00607647	-0.00182781	-0.00216914	-0.00164509	-0.00663043	0.00632647	-0.000171167	0.000268577	0.000258898	-0.00211789	0.000442062	-0.00511233	0.00481567	0.0018517
Goniatites hudsoni	Korn & Tilsley (2006, text-fig. 24B)	-0.605374	-0.180226	0.450156	-0.880809	0.0708902	-0.14278	-0.0815379	-0.101485	0.00921935	0.0811185	-0.0189669	-0.0070335	0.00837966	-0.00414017	0.0012923	0.0643069	-0.00482614	0.018398	-0.00350368	0.00622744	-0.0136151	-0.0139739	0.0145951	-0.00733216	0.00664849	-0.00707461	-0.00626778	-0.0153784	-0.00131113	0.00272989	0.00258171	-0.00439488	0.00553387	0.000986316	-0.00536929	0.00997358	-0.00267526	0.00679648	0.000882595	0.00363192	-0.00282853	-0.00482961	0.00231523	0.00178753	0.000456564	0.000292416	0.000442183	-0.00602348
Goniatites hudsoni	Korn & Tilsley (2006, text-fig. 24C)	-0.654415	-0.225937	0.452885	-0.881324	0.139401	-0.124246	-0.0758646	-0.134069	-0.0103104	0.0657029	-0.0180659	-0.00904869	0.0284757	0.0112267	-0.0149146	0.0721158	-0.00585067	0.0100226	0.000581783	0.00578019	-0.00692739	-0.0242637	0.00876689	-0.000173067	0.0054525	-0.00130866	0.000101125	-0.0198052	0.00128026	-0.00114216	0.00317637	-0.00174604	0.00604963	0.00899601	-0.00711037	0.00441852	-0.00536603	0.00194498	0.000770902	0.00595257	0.000160998	-0.00306042	-0.00205038	0.00187596	-0.00204777	-0.00289697	0.00403974	-0.00466748
Goniatites moorei	Korn & Tilsley (2006, text-fig. 26D)	-0.617951	-0.52726	0.696983	-0.710626	0.211656	-0.0232383	0.0145528	-0.175747	-0.0406239	0.00159304	0.000452689	-0.00824343	-0.0088434	0.0388587	-0.0762393	0.0127787	-0.0200968	-0.015647	-0.00693956	0.0150976	0.015682	-0.00394347	0.00191342	0.00262862	-0.00162584	-0.00311615	0.02086	0.0135343	-0.000901348	0.0118923	0.00395395	0.000859095	-0.00756382	-0.00501306	0.00397671	-0.00437779	0.000413241	-0.00177534	-0.00269318	-0.0127234	0.000819804	-0.00176129	-0.000153654	-0.000149093	0.00266958	0.0069884	-0.00437358	0.00112638
Goniatites moorei	Korn & Tilsley (2006, text-fig. 26E)	-0.744245	-0.322303	0.560702	-0.777417	0.140994	-0.125807	-0.0651579	-0.163031	-0.0323955	0.0349674	-0.000326107	-0.0276795	0.0338338	0.0277426	-0.0332947	0.0570134	-0.0160056	0.0230394	0.0040951	0.0131201	0.00191863	-0.0132592	0.000890216	0.00864106	-0.00641348	-0.00287247	0.0100647	-0.0195973	0.00413669	-0.00658448	0.00287942	-0.00350878	0.000182795	0.00946978	-0.00184718	-0.00545783	-0.00112577	0.00332216	-0.00391255	0.00826951	-0.000821478	0.00425339	-0.00317352	0.000579776	-0.00172608	-0.00579778	0.00180714	0.00229315
Goniatites moorei	Korn & Tilsley (2006, text-fig. 26F)	-0.656319	-0.244986	0.552149	-0.800527	0.143722	-0.0980154	-0.0469467	-0.133218	-0.0208362	0.0489977	-0.0105915	-0.0350107	0.0119148	0.0137857	-0.0355664	0.0600725	-0.0138742	0.00951545	-0.00649011	0.00716439	-0.00456746	-0.0185783	0.00681015	0.0117239	0.0104595	0.00233429	0.0116068	-0.0142069	0.00263861	-0.00323964	0.00898743	-0.00339277	0.000519765	0.00899045	-0.00767236	-0.00409379	-0.00852581	0.00131839	-0.00430545	0.0030479	0.00163705	-0.000756727	-0.00572432	0.00208885	-0.000266773	-0.00365779	0.00467823	0.000702256
Goniatites rodioni	Klug et al. (2006, text-fig. 21F)	-0.508439	-0.173101	0.390556	-0.919392	0.106889	-0.145985	-0.0730077	-0.0733687	0.0148974	0.0588462	-0.0373801	0.0065935	-0.000841977	0.00798493	0.0103305	0.0686802	-0.000314531	0.00252679	-0.00242612	0.00297754	-0.0148175	-0.00934478	0.0153526	-0.0180665	0.00693008	-0.00821493	-0.00546278	-0.0102586	0.00235074	0.00838285	-0.00274839	-0.0023689	0.00177611	0.00173993	-0.00175777	0.013047	0.000220855	0.00292632	-0.00110681	0.00122319	-0.00396682	-0.00327978	0.00470919	-0.00277628	0.00330035	-0.00241014	-0.00144464	-0.00447256
Goniatites rodioni	unpubished	-0.509263	-0.161998	0.373243	-0.926527	0.103179	-0.150301	-0.0759147	-0.0711711	0.0177819	0.0579948	-0.0370524	0.00853268	-0.000868307	0.00818363	0.0152566	0.0679445	-8.60396e-05	0.00266392	-0.00193326	0.00325732	-0.015657	-0.00780892	0.0133689	-0.0197121	0.00622713	-0.00883206	-0.00688062	-0.00951459	0.00409718	0.0080556	-0.00336308	-0.00198328	0.00211837	0.00108921	0.000275244	0.0130011	0.000642053	0.00284422	-0.000667269	0.00177446	-0.00450906	-0.00267323	0.00405096	-0.00355922	0.00252418	-0.00324678	-0.00220794	-0.00416981
Goniatites sphaericus	Korn (1988, text-fig. 38A)	-0.686892	-0.381735	0.603971	-0.773134	0.168103	-0.0887335	-0.0302705	-0.18692	-0.0545108	0.0467241	4.83955e-05	-0.00712739	0.019171	0.0329274	-0.0492796	0.0434165	-0.0323036	-0.000561927	-0.00149728	0.0147343	0.0114053	-0.0175078	0.000334934	0.00434992	-0.000605869	-0.00480277	0.0218695	-0.00784669	0.0100384	0.000460356	0.00205188	-0.00190789	-0.00902798	0.00841838	-0.000727858	-0.00332907	-0.000516758	-0.00121081	-0.0100703	0.000403988	-0.00414653	-5.32731e-05	-0.00141605	-0.00143263	0.00613449	-0.00261788	0.00130007	0.00315318
Goniatites sphaericus	Korn (1988, text-fig. 38B)	-0.742109	-0.120342	0.392137	-0.875779	0.0917557	-0.137986	-0.0969406	-0.124684	0.00555814	0.0631532	-0.0192545	-0.0242247	0.0337975	0.000988338	0.010158	0.0654048	0.00311621	0.0197197	0.00361605	0.00768609	-0.019528	-0.00712947	0.00908536	0.00362008	0.000495871	-0.0022376	-0.0101636	-0.0147438	-0.00590407	-0.00536314	8.65135e-05	-0.00737083	0.00839121	-0.00224322	-0.00397239	0.00452278	0.00126604	0.00464341	0.0056248	0.00297434	0.000818386	-0.000643152	0.00194713	0.00520364	-0.00215383	0.00297455	0.000143974	-0.00363322
Goniatites stenumbilicatus	Klug et al. (2006, text-fig. 28B)	-0.659849	-0.162601	0.298774	-0.952584	0.115056	-0.184083	-0.118676	-0.104597	0.0113514	0.0630922	-0.0205665	0.00135719	0.0342689	0.0111171	0.033244	0.0693401	0.00709447	0.0185428	0.00701821	-0.00475579	-0.0246027	-0.00600021	0.000367066	-0.00787307	0.00017342	-0.007695	-0.0181485	-0.00783751	-0.00798746	-0.00554937	0.000521793	-0.000554048	0.00844945	-0.00181453	0.00593082	0.00903442	0.00401853	0.00422664	0.00813884	-0.0039168	-0.00272684	-0.000232519	-0.00125556	0.000311503	-0.00120966	0.0040242	-0.0068503	-0.00142996
Goniatites stenumbilicatus	unpubished	-0.59393	-0.340722	0.560623	-0.825007	0.197367	-0.0919752	-0.0420818	-0.157066	-0.0388971	0.0493132	-0.0129236	-0.0157701	0.00403892	0.0363688	-0.0519778	0.0576174	-0.0164239	0.0108424	0.00527941	0.00798753	0.00984423	-0.024558	0.00668762	0.00191775	0.00622488	0.00202891	0.01614	-0.012563	0.00880275	-0.00256828	0.000380812	0.000968212	-0.00591969	0.0063484	-0.00877965	-0.00485494	-0.00545048	-0.00236725	-0.00778152	0.00551689	0.0026665	0.001037	0.00115806	-0.000828318	0.00261648	-0.00339273	0.0057851	0.00379827
Gourarites hagaraswad	Bockwinkel et al. (2010, text-fig. 40D)	-0.797885	-0.272664	0.291589	-0.955147	0.118531	-0.0353298	-0.066246	-0.13125	0.0219933	0.0682916	0.0194206	0.0282433	0.0619072	-0.00113298	-0.0166864	0.0449385	-0.0159003	0.0113406	-0.00998853	-0.00140871	0.00717281	-0.00981288	-0.00596048	-0.00353089	-0.00619632	0.0033218	0.00809738	-0.011471	0.00236222	-0.00235419	0.00609253	0.00561144	-0.00317226	0.00730638	0.000306913	0.000724529	-0.0015169	-0.00242771	-0.00363341	0.00308798	0.000279545	0.00226528	-0.00281644	-0.00485788	0.0024571	-0.00284975	0.00183722	-0.00050654
Gourarites mustari	Bockwinkel et al. (2010, text-fig. 44F)	-0.848825	-0.488619	0.40441	-0.846043	0.0955743	-0.0140146	-0.0311937	-0.175433	-0.0177578	0.0518969	0.0307538	0.0382056	0.0513008	0.0424304	-0.0162722	0.0207536	-0.0359607	-0.00327604	-0.0119846	0.00275166	0.00502213	0.0115589	-0.00833053	-0.0125794	-0.00616801	-0.0150187	0.00906908	-0.00402738	0.00692235	0.00694747	0.00289527	0.00217112	-0.00181747	-0.00358022	0.0012388	0.0065584	3.19846e-05	0.0062253	-0.00516763	-0.000163017	-0.00203193	-0.00490831	-0.000207352	-0.00192795	0.000372045	0.00253566	0.00109739	-0.00363782
Hammatocyclus pollex	Ebbighausen et al. (2010, text-fig. 7J)	-0.562428	-0.136098	0.397435	-0.909442	0.0295257	-0.0609655	-0.052861	-0.0610107	0.040708	0.122388	-0.0215559	0.000454522	0.0085468	-0.00137871	0.00371213	0.0439583	-0.00179677	-0.00156505	-0.0184824	0.000297305	-0.00954292	-0.00616761	0.0103181	-0.00972946	0.0104294	-0.00651595	0.0017489	0.00113256	0.00242054	0.00821729	0.003902	-0.00322069	-0.00360335	0.000506129	-0.00132124	0.00572558	0.000410591	0.00106994	-0.00583898	-0.00170227	-0.00198979	-0.00386264	0.00242622	-0.00143052	0.0044382	-0.00251207	0.000371645	0.000643962
Hibernicoceras artilobatum	Korn & Ebbighausen (2008, text-fig. 44E)	-0.629702	-0.201231	0.443537	-0.886093	0.116963	-0.126842	-0.0763228	-0.12865	-0.00848055	0.0887582	-0.0183261	-0.00554223	0.0271863	0.0142487	-0.0082256	0.0680829	-0.00699622	0.0111262	-0.000703002	0.00256008	-0.0159833	-0.0235019	0.0100612	-0.00243637	0.00216161	-0.00200959	-0.00159142	-0.017216	-0.0018056	0.00117166	0.00476007	-0.000928686	0.00746411	0.00832839	-0.00582287	0.00536438	-0.0031335	0.00432682	0.00118721	0.00323717	0.000471389	-0.00524028	-0.00239844	0.000606299	-0.00234754	-0.0012103	0.00182468	-0.00444937
Hibernicoceras carraunense	Korn & Ebbighausen (2008, text-fig. 40F)	-0.642749	-0.256161	0.367881	-0.92987	0.111545	-0.0899327	-0.0789679	-0.103614	0.00529313	0.0766887	-0.010123	0.0104593	0.0247772	0.0132895	-0.000468525	0.0682706	-0.00948675	0.00303613	0.000158486	-0.00684101	-0.0165728	-0.0159299	0.00531571	-0.008121	0.00794775	-0.00261744	-0.00364751	-0.0146314	-0.00133245	0.00148319	0.00319718	0.00357368	0.00757278	0.00646368	-0.00329963	0.00872328	-0.00433745	0.00153905	0.00229774	0.00046875	-0.00173834	-0.00498284	-0.00207941	-0.00175266	-0.0016314	0.000301555	0.000920418	-0.0049914
Hibernicoceras touissitense	Korn & Ebbighausen (2008, text-fig. 42F)	-0.686667	-0.340424	0.473467	-0.879912	0.139157	-0.0907196	-0.0643967	-0.139893	-0.0255922	0.0639053	-0.00745633	-0.00124849	0.0335366	0.0322807	-0.025534	0.0674104	-0.0113375	0.00335119	0.00561197	-0.00114956	-0.00498017	-0.019683	0.00181685	-0.00327861	0.00300906	0.00370361	0.00708801	-0.0179967	0.00519042	-0.00190826	0.00118731	0.00218727	-0.000299574	0.0117542	-0.0066304	0.00237071	-0.00150048	0.000267253	-0.00110214	0.00655428	0.00109715	-0.00281328	-0.00141187	-0.00351797	-0.00198817	-0.00413026	0.00423479	-0.00142053
Hypergoniatites fusiger	Klug et al. (2006, text-fig. 30D)	-0.375319	-0.398286	0.646993	-0.759171	0.196549	-0.0621559	-0.0191387	-0.138402	-0.0675778	0.0520664	-0.0293289	0.00309703	0.00130687	0.00348309	-0.0659243	0.0242368	-0.0138556	-0.0116233	0.00480645	0.00626107	0.0224783	-0.00530459	0.0116332	0.0141691	-0.00598436	0.0125856	0.017643	0.00319942	-7.16821e-05	-0.00361819	-0.0028555	-0.00483874	-0.00663253	-0.00285588	5.96027e-05	-0.01233	0.00662553	-0.00234152	-0.00434485	-0.00132051	-0.00265904	0.00759748	-0.00205374	0.00298766	0.000733238	6.33566e-05	-0.00383081	0.0056471
Itimaites parabolicus	Klug et al. (2006, text-fig. 10B)	-0.872574	-0.269511	0.342162	-0.932455	0.0564772	-0.0770902	-0.0996808	-0.127058	0.0120724	0.0726203	0.0331203	0.00341082	0.0353413	-0.0129973	0.000601877	0.0465256	-0.012993	0.0262512	0.000767751	0.00329368	-0.0100032	-0.0182586	-0.00996617	0.00236605	-0.00403781	0.00607228	-0.00335369	-0.0122239	0.000389817	-0.0103952	0.00589761	3.76726e-05	0.00728131	0.00567281	0.00296847	-0.00163174	-0.00344224	-0.000797734	0.00216476	0.00454192	0.00217045	0.00450917	-0.00443326	0.00126442	-0.00516905	-0.00151121	-0.000562302	-0.00053503
Lusitanites circularis	Korn & Ebbighausen (2008, text-fig. 67B)	-0.86641	-0.488055	0.430204	-0.836888	0.121073	-0.00173052	-0.0422966	-0.188794	-0.0146776	0.0403388	0.0298249	0.0185625	0.0397882	0.0532391	-0.0235643	0.0265403	-0.0261709	-0.00235295	-0.00432606	0.0129261	0.00327719	-0.00132999	-0.0122851	-0.0117486	-0.00491623	-0.01557	0.00679573	-0.00370187	0.0121482	0.00545766	0.00287233	-0.00151433	-0.000210934	-0.000624399	0.00385307	0.00700136	-8.82547e-05	0.00727112	-0.00419966	0.000164303	-0.0050794	-0.00455579	-0.00176898	6.22316e-05	0.000636909	0.000577824	-0.000390049	-0.0040115
Lusitanoceras zirari	Korn & Ebbighausen (2008, text-fig. 50F)	-0.805673	-0.490404	0.539563	-0.839033	0.170004	-0.0816156	-0.0742086	-0.189264	-0.0294831	0.0268098	0.0105685	0.000702104	0.0293946	0.0433658	-0.0327315	0.0555148	-0.0418725	0.00197163	0.015314	0.0213014	-0.00855474	-0.00674725	1.26894e-05	-0.000180982	-0.00825377	-0.0111738	0.0208036	-0.016038	0.00953313	-0.00479396	-0.00213171	-0.0104727	-0.00588221	0.00911513	-0.00134028	0.000267483	0.00573057	0.00771375	-0.00742471	0.00743636	-0.00558428	-0.00305611	0.000309469	0.000933833	0.00146944	-0.00367088	-0.000407961	0.000210263
Muensteroceras fabrei	Ebbighausen et al. (2010, text-fig. 21E)	-0.899937	-0.345272	0.415242	-0.864946	0.0619426	-0.0394718	-0.0778551	-0.126218	-0.00486127	0.066722	0.0460229	-0.010427	0.0360154	0.0124054	-0.00874891	0.034226	-0.0220107	0.0229335	-0.00237074	-0.00139978	-0.00164718	-0.00997081	-0.0154205	0.00445727	-0.00339061	-0.000413902	-0.00049735	-0.0123779	0.00682089	-0.00993287	0.00232474	0.00251943	0.00399084	0.0060148	0.00411967	-0.00114684	-3.63077e-05	-0.000601764	0.00111834	0.00706969	-0.00200353	0.004277	-0.00247546	-0.00113994	-0.00366325	-0.0035099	-0.000864856	0.000617726
Neogoniatites worki	Klug et al. (2006, text-fig. 33B)	-0.630437	-0.270525	0.507174	-0.853129	0.203309	-0.157643	-0.0620181	-0.15568	-0.0323947	0.0320754	-0.0219872	-0.0121497	0.0143102	0.0176474	-0.0299511	0.0785601	-0.0218959	0.0113734	0.00697011	0.0118936	-0.0066995	-0.0243923	0.0106897	0.00537534	0.00262325	-0.00282487	0.0119148	-0.0217695	0.00281007	-0.00528343	0.00279187	-0.00328296	0.00143142	0.0118547	-0.00920596	-0.000969838	-0.00516553	0.00278566	-0.00344254	0.00890581	0.0010355	-0.000455523	-0.00174113	0.000897087	-0.00266836	-0.00492346	0.00689847	-0.000593277
Paraglyphioceras celeris	Korn & Ebbighausen (2008, text-fig. 48D)	-0.648865	-0.139862	0.291404	-0.953697	0.0192512	-0.150458	-0.118427	-0.0731291	0.0539854	0.082303	-0.00784613	0.00567677	0.0120196	-0.0146436	0.0392431	0.048722	0.00641021	0.0232014	-0.00020434	0.00164151	-0.0211258	0.000989333	-0.000337768	-0.0131544	-0.00152802	-0.00642113	-0.017974	0.000234828	0.00232505	-0.000706708	0.000420048	-0.00317442	0.00390664	-0.00853423	0.0078199	0.00625829	0.00574801	0.00348805	0.00316563	-0.00286154	-0.00419349	0.00352144	0.000846002	-0.000121308	0.00168965	0.0024498	-0.00594988	0.00150042
Paraglyphioceras rudis	Korn & Ebbighausen (2008, text-fig. 46G)	-0.542161	-0.557609	0.741351	-0.669577	0.158518	0.0312714	0.0569496	-0.136014	-0.0574686	-0.014555	-0.0130292	-0.00112292	-0.0225133	0.0193111	-0.0726844	-0.021514	0.00470255	-0.0132678	-0.0026165	0.0101694	0.0203481	0.0124654	0.00251108	0.00828966	-0.00225619	-0.00152495	0.000732041	0.0202073	-0.00212323	-0.000338242	0.00138886	-0.00402329	0.00306301	-0.0119286	0.00714106	-0.00187255	0.000530869	0.00386715	0.00429804	-0.00397077	-0.00223109	0.000225599	-0.00443601	0.00194882	-0.0035106	0.00136763	-0.00199141	-0.00434252
Platygoniatites rhanemensis	Klug et al. (2006, 20% extended)	-0.645452	-0.37871	0.514637	-0.857334	0.151647	-0.163067	-0.087202	-0.165221	-0.0370543	0.0737938	-0.00997961	0.00569639	0.0364669	0.0140718	-0.0150371	0.0708814	-0.0445544	0.00589085	0.0109021	0.00874418	-0.00633948	-0.0151347	0.00906978	0.0047794	0.0018609	-0.00994141	0.00983093	-0.0264209	0.00265407	-0.00571597	-0.00377197	-0.000119951	0.00577604	0.0147467	-0.0045992	0.000678954	-0.00205108	0.000211792	-0.00349333	0.00998247	-0.000947495	0.00175615	0.000337668	-0.000236898	-0.00218879	-0.00735087	0.00534503	-0.00197308
Platygoniatites rhanemensis	Klug et al. (2006, text-fig. 41E)	-0.551209	-0.281479	0.454715	-0.890637	0.118674	-0.164747	-0.0891819	-0.124121	-0.0113529	0.0918119	-0.0178177	0.00879514	0.0143469	-0.00487492	-0.000986863	0.0713527	-0.0327026	0.0146436	0.00392021	0.00317926	-0.00849826	-0.0183784	0.017395	-0.00459647	0.00581505	-0.00863525	-0.00344557	-0.0229336	-0.000369764	0.0038163	0.00061362	0.00130374	0.00898393	0.00698951	-0.00826607	0.00649789	-0.00634803	0.00374542	0.00194271	0.00605577	0.000835684	-0.00529777	0.00123506	0.000190255	-0.00269338	-0.0021829	0.0033124	-0.00687004
Platygoniatites rhanemensis	Klug et al. (2006, text-fig. 41F)	-0.716922	-0.369101	0.448231	-0.893801	0.161376	-0.173195	-0.109298	-0.141131	-0.0294894	0.035968	-0.00593276	0.0125658	0.032973	0.016969	0.00332549	0.0826821	-0.0349675	0.0154173	0.0217589	0.00385167	-0.0165496	-0.010512	0.00853397	-0.000690735	-0.00998033	-0.00743289	0.00108714	-0.029071	-0.00338505	-0.00576275	-0.00418889	0.00227173	0.0103461	0.00933236	0.000217649	0.00486101	-0.000184321	-0.00176764	0.00423163	0.00983571	-0.00123612	0.00266844	5.12135e-05	-0.00121801	-0.00589319	-0.00396876	0.00171732	-0.00469437
Revilloceras bellornatum	Klug et al. (2006, text-fig. 37B)	-0.602733	-0.415421	0.60796	-0.792068	0.223564	-0.0456669	-0.00860916	-0.181359	-0.0523408	0.0399191	-0.0113203	-0.0148012	0.000656729	0.0430265	-0.0680323	0.0385194	-0.0285358	-0.0161425	0.00275835	0.0137467	0.00674247	-0.0220249	0.00338648	0.00456809	-0.00180137	0.00123142	0.0242569	0.00612632	0.0126453	0.00208994	0.00406185	-0.000105037	-0.0132266	-0.00364761	-0.0026081	-0.00900932	-0.00153726	-0.000495065	-0.0103059	-0.00451368	0.0015353	0.00116005	0.00149194	-0.000213869	0.00714375	0.000995774	-0.00160419	0.00474341
Revilloceras bellornatum	unpubished	-0.589737	-0.428459	0.625058	-0.778913	0.228952	-0.0341542	-0.000872469	-0.185014	-0.056292	0.036072	-0.00982727	-0.0154137	-0.00395597	0.0422	-0.071126	0.0329057	-0.0265863	-0.0205081	0.000924091	0.014806	0.00964645	-0.0206309	0.00222544	0.00437049	-0.00243295	0.00189246	0.0232976	0.00974089	0.012026	0.00480841	0.00458443	0.000371924	-0.0117844	-0.00679987	-0.000872405	-0.00881792	-0.000572503	-0.00131299	-0.00949496	-0.00694943	0.00126485	0.00118317	0.00138356	1.52915e-05	0.00615733	0.0029533	-0.00274112	0.00419372
Revilloceras granofalcatum	Klug et al. (2006, text-fig. 35F)	-0.672311	-0.275375	0.543809	-0.81352	0.187048	-0.0755776	-0.0137751	-0.16471	-0.047352	0.0536565	-0.0127437	-0.0212907	0.0131497	0.0300078	-0.0470466	0.058284	-0.0315903	-0.00272477	-0.00107228	0.00412238	-0.00704572	-0.0152547	0.00252719	0.00948321	0.00369468	0.00890863	0.0242353	-0.00882005	0.00615656	-0.00276755	0.00671418	-0.0032388	-0.00956004	0.0100563	-0.00675602	-0.00724849	-0.0038183	-0.000725118	-0.00779831	0.00124388	0.00160719	0.000171286	-0.00392263	-0.00266426	0.00343143	-0.00361149	0.00304763	0.00553634
Revilloceras granofalcatum	unpubished	-0.610553	-0.193064	0.358255	-0.93226	0.0903689	-0.110413	-0.0758012	-0.108507	0.00269416	0.114367	-0.0154401	0.0159365	0.0156615	-0.000702945	0.011057	0.0646546	-0.0321676	0.0167037	-0.00306909	-0.00378612	-0.0149584	-0.00940168	0.0125849	-0.0112212	0.00297912	-0.00687667	-0.00676995	-0.0165821	-0.00217889	0.00851059	0.00252565	0.00227201	0.0110097	0.00386991	-0.00367293	0.00939701	-0.00626213	0.00208837	0.000331338	0.00106805	-0.00193599	-0.00279429	0.00052102	-0.00112513	0.000224103	-0.000430966	-0.000370933	-0.00627978
Semibollandites qawiy	Bockwinkel et al. (2010, text-fig. 53C)	-0.871732	-0.318624	0.45801	-0.799807	0.116724	-0.104484	-0.0706911	-0.204159	-0.0303238	0.0529996	0.0105627	-0.0021606	0.0707835	0.0226997	-0.0166673	0.0405752	-0.0176308	0.0144311	0.00140319	0.0171088	0.00721574	-0.00820227	-0.0111221	0.00292374	-0.0143317	-0.00143909	0.00375395	-0.0112565	0.00909912	-0.00762763	0.000422365	-0.00422742	-0.00310656	0.00584485	0.00594477	-0.00129688	0.00570647	0.000858826	-0.000835243	0.00503814	-0.00566075	0.00531003	-0.000530984	0.00090315	0.000146074	-0.00310595	-0.00314616	0.000577201
Semibollandites qawiy	Bockwinkel et al. (2010, text-fig. 53D)	-0.853639	-0.472608	0.507147	-0.65831	0.098088	-0.0834005	-0.0408489	-0.206825	-0.043548	0.0312836	0.0249775	0.00553038	0.0657874	0.0528029	-0.00635368	0.0164585	-0.0245542	0.000241083	-0.00255851	0.0103629	0.00188511	0.0129659	-0.0156181	-0.00476764	-0.0118281	-0.0137425	1.0306e-05	-0.00521778	0.00868321	0.0024091	-0.00107597	-0.00348374	0.00152821	-0.00587742	0.00730132	0.00393434	0.00426986	0.00716641	-0.000809435	0.00167522	-0.00336326	-0.00160583	5.84802e-05	0.0033562	-0.00130971	0.00312701	-0.00327059	-0.00271181
Semibollandites qawiy	Bockwinkel et al. (2010, text-fig. 53F)	-0.881743	-0.461685	0.419161	-0.672635	0.116539	-0.0443137	-0.017805	-0.217849	-0.0310334	-0.00339328	0.0132339	0.00841563	0.0504241	0.0553632	-0.0125421	0.022563	-0.0145766	-0.0038604	-0.00831154	0.0225596	0.00246429	0.0140516	-0.00744573	-0.00568964	-0.00777027	-0.0175357	0.00115522	-0.00631102	0.00191328	0.00693975	0.00453406	-0.00674977	0.00210164	-0.00568525	0.00387435	0.00324952	-0.00178541	0.00914912	0.000457007	0.00253775	-0.000249466	-0.0031842	-0.00242916	0.00252734	-0.00460879	0.00243464	-0.00125663	-0.0023818
Sudeticeras fornicum	Klug et al. (2006, text-fig. 15B)	-0.733056	-0.206949	0.414952	-0.89085	0.131822	-0.0793328	-0.0604105	-0.146098	-0.00947676	0.069453	-0.00507772	-0.00338371	0.0283583	0.0143762	-0.023403	0.0653646	-0.00820768	0.014309	0.00251714	0.00562473	-0.00731108	-0.0264723	0.00318347	-0.00228162	-0.000328513	0.00211431	0.0047313	-0.0173786	0.000578476	-0.00406597	0.00362805	0.000743137	0.00492971	0.0115515	-0.00423657	0.00294374	-0.00370694	-0.00124311	-0.00105799	0.00549903	0.000744277	-0.000326215	-0.00352116	-0.00137215	-0.00278413	-0.0038613	0.00396223	-0.00228867
Sudeticeras fornicum	Klug et al. (2006, text-fig. 15C)	-0.641809	-0.38116	0.404687	-0.90541	0.0697929	-0.0757102	-0.0858835	-0.104319	-0.0133699	0.0995635	0.0180032	0.0262703	0.0102645	0.00175209	-0.00188279	0.0558436	-0.030719	0.00848432	0.00685107	-0.010177	-0.00740405	-0.0260818	-0.000190056	-0.0106478	0.00372587	0.0058468	-0.00161151	-0.0133828	0.00602745	-0.00108594	0.0027534	0.00851863	-2.79554e-05	0.0106171	-0.00168181	0.0037726	-0.00583184	-0.00166379	0.00239357	0.00167062	4.88367e-05	-0.00232708	-0.0027898	-0.00579286	-0.00108789	-0.00182598	0.00185065	-0.00211512
Sudeticeras horoni	Korn & Ebbighausen (2008, text-fig. 62D)	-0.860528	-0.370372	0.452968	-0.870446	0.153052	-0.0522788	-0.0521948	-0.202239	-0.036091	0.0515819	0.00852682	7.55301e-05	0.0484377	0.0500164	-0.0265587	0.0518624	-0.023906	2.06822e-05	0.00566139	0.0131209	-0.000306509	-0.0153012	-0.0116106	-0.00313846	-0.0102901	-0.00975097	0.0104951	-0.0104408	0.0122942	-0.00284008	0.000683609	-0.00242397	-0.00387262	0.00696334	0.00460914	0.00295601	0.00323356	0.00446354	-0.00413529	0.0044492	-0.00772775	-2.11631e-07	-0.000567624	-0.00152131	0.00176945	-0.00343393	-0.00258539	-0.00158164
Sudeticeras ibnbajjahi	Korn & Ebbighausen (2008, text-fig. 56G)	-0.687775	-0.229668	0.320019	-0.947404	0.0606201	-0.125523	-0.111054	-0.0851241	0.0212193	0.0965922	0.000707347	0.000661568	0.0406328	0.00720569	0.0306681	0.0539535	-0.00457458	0.0120474	-0.0047934	-0.00877311	-0.0235168	-0.00300359	-0.00373307	-0.00395626	0.00560378	-0.00350256	-0.0154832	-0.00454262	0.00273076	-0.00258713	0.00686228	-0.00123503	0.0100794	-0.00318918	0.00413947	0.00384495	-0.000364787	0.00623148	0.0022138	-0.00279767	-0.0037662	0.00100238	-0.00234729	0.00381988	-0.00170244	0.00207278	-0.00379906	-0.000864809
Sudeticeras murracaoense	Korn & Ebbighausen (2008, text-fig. 53F)	-0.635342	-0.399875	0.570529	-0.819591	0.102955	-0.0732277	-0.0329984	-0.139705	-0.0710227	0.0889703	0.00214911	0.0112064	0.0206642	0.033453	-0.0352067	0.0446639	-0.0216559	-0.00932014	0.00651905	-0.00804894	0.00829637	-0.0174989	0.003323	-0.00429923	0.00190802	0.0067546	0.0113577	-0.00961269	0.0026471	0.00222521	-0.00504835	0.00614941	-0.00899966	0.00814485	-0.0047129	-0.00120589	0.00215443	-0.00514183	-0.00210116	0.00198077	0.00247022	-0.00224686	0.00313716	-0.00394698	0.00179808	-0.000532479	0.00158322	0.00333823
Sudeticeras occultornatum	Klug et al. (2006, text-fig. 19E)	-0.774125	-0.236172	0.399857	-0.901706	0.0683307	-0.101651	-0.0998911	-0.132665	0.0149911	0.0815657	0.012387	-0.00110821	0.0307234	-0.0166664	-0.00596558	0.0551887	-0.00980002	0.0195192	0.00157812	0.00841933	-0.0129356	-0.0259471	-0.0014497	0.00219548	0.00175088	0.000753442	-0.00251933	-0.0143994	-0.000898888	-0.00807641	0.00454131	-0.00180869	0.0105819	0.00807994	-3.56043e-05	0.001346	-0.00502452	0.00280502	0.00227647	0.00451945	0.00224133	0.00190281	-0.00336072	0.00167384	-0.00657295	-0.00229699	-0.00041773	-0.0025563
Sudeticeras occultornatum	Klug et al. (2006, text-fig. 19F)	-0.613027	-0.480363	0.443501	-0.86627	0.115243	0.00516542	-0.00429872	-0.151013	-0.0510298	0.0402151	-0.0183136	0.0611173	0.018136	0.0354198	-0.036842	0.0296771	-0.012572	-0.0327323	0.00612678	-0.00100398	0.0135142	-0.0021772	0.0133661	-0.013713	-0.00234416	-0.00617098	0.00758744	0.00371529	-0.00423654	0.0139454	-0.00833517	0.00199465	-0.0025322	-0.00556242	-0.00455736	0.00124741	0.00239424	-0.000149208	0.00217448	-0.00456553	0.00430949	-0.00367156	0.00380365	0.00242011	-0.00158292	0.00458477	-0.00038381	0.000955303
Sudeticeras pusillobatum	Klug et al. (2006, text-fig. 17C)	-0.609671	-0.387662	0.442638	-0.890082	0.132435	-0.0960989	-0.0613439	-0.129943	-0.0469341	0.0599702	-0.00369368	0.0375573	0.0172464	0.0185794	-0.0221968	0.0625513	-0.0233875	-0.0045902	0.0131556	-0.0050209	0.00786937	-0.022424	0.00624933	-0.0128931	0.00167112	0.00177823	0.00596447	-0.0154639	0.00506369	0.00260196	-0.00807528	0.00917271	-0.00316856	0.0089938	-0.00515955	0.0052239	-0.00085083	-0.00670366	-1.90692e-05	0.00406799	0.000944447	-0.0026146	0.00487017	-0.00558204	0.00146185	-0.00417698	0.00259385	-0.000587226
Sudeticeras pusillobatum	Klug et al. (2006, text-fig. 17D)	-0.5602	-0.462415	0.542613	-0.831748	0.149787	-0.0580092	-0.0294559	-0.140127	-0.0651452	0.0398179	-0.0159855	0.0340264	0.00673034	0.0252776	-0.0477978	0.0454312	-0.0162996	-0.0184518	0.0141979	0.00316116	0.0203947	-0.0118106	0.0127454	-0.00585233	-0.000667225	0.00231529	0.0153299	-0.00608369	0.00057415	0.0064219	-0.0118439	-0.000911508	-0.00962117	0.00125232	-0.00686191	-0.0019548	0.00595186	-0.00276268	-0.00356378	0.00150866	0.00273925	-0.00044537	0.00676711	0.00289937	0.0039138	0.00104668	0.000738783	0.00253789
Sudeticeras pusillobatum	unpubished	-0.635955	-0.340862	0.373261	-0.921107	0.116479	-0.114013	-0.0793752	-0.11769	-0.0327641	0.0688133	0.0043474	0.0375338	0.0221359	0.0125599	-0.00227765	0.0662343	-0.0239224	0.00397066	0.0101086	-0.0102861	-0.00221224	-0.0231353	0.000368561	-0.0141608	0.00250973	0.000641715	-0.00312052	-0.0164326	0.00592418	-0.000396518	-0.00129256	0.0121537	0.00327542	0.00893049	-0.00108042	0.00734453	-0.004876	-0.00432008	0.0027565	0.00278677	-0.00122028	-0.00239192	-0.0010199	-0.00732348	-0.00219952	-0.003653	0.00140908	-0.00242365
Sudeticeras splendens	Korn & Ebbighausen (2008, text-fig. 58B)	-0.725792	-0.424178	0.427395	-0.894934	0.0866515	-0.0527949	-0.075065	-0.124639	-0.0108843	0.0766165	0.0218744	0.0229175	0.0303338	0.0131891	-0.0158173	0.0491651	-0.0286568	0.00547979	0.00366705	-0.00552972	0.00293495	-0.0180845	-0.00512317	-0.00762968	-0.00127179	-0.000376096	0.00413227	-0.0134622	0.00945451	0.000404819	0.000536674	0.00808901	-2.24171e-05	0.00868228	-0.000200467	0.00243331	-0.00239538	-0.00304982	-0.0022231	0.00402219	-0.00291982	-0.000552492	-0.0011465	-0.0053686	0.000808946	-0.00417944	0.00186407	1.44797e-05
Timimounia lunula	Bockwinkel et al. (2010, text-fig. 58E)	-0.869509	-0.335517	0.405559	-0.903861	0.0574599	-0.0805131	-0.0860519	-0.135058	-0.00936948	0.0780706	0.0352243	0.0080503	0.0477247	-0.00158288	-0.00294984	0.0421626	-0.02391	0.0181836	-0.00276757	-0.00223069	-0.00126946	-0.0134393	-0.0128834	0.00151171	-0.00501061	0.002096	-0.000369497	-0.0118208	0.00676971	-0.00782963	0.00553698	0.00394757	0.00346331	0.00617327	0.00396521	-0.00226256	-0.00237811	-0.000483845	1.80391e-05	0.00601954	-0.00142406	0.00403807	-0.00440212	-0.00164925	-0.00348234	-0.00382712	-0.000391711	0.000447101
Trimorphoceras absolutum	Ebbighausen et al. (2010, text-fig. 31C)	-0.716577	-0.397495	0.37513	-0.912392	0.0503048	0.0274675	-0.0207687	-0.0919112	-0.0205194	0.083466	0.0277495	0.0451972	0.0136771	0.00421665	-0.0279689	0.0197434	-0.0304046	-0.00186005	-0.00473261	-0.0178036	0.0130779	-0.006834	-0.00105378	-0.0069141	0.000933663	0.00596434	0.0107018	0.00189833	0.00359581	0.000955801	-0.00465506	0.0077105	-0.00772265	0.00402943	-0.00302533	-0.00189408	0.00324833	-0.00560046	-0.00147806	-0.00205183	-0.000414516	0.00146325	0.00407159	-0.00218521	0.00294594	0.000168326	0.000289283	0.00372247
Trimorphoceras azzelmattiense	Korn et al. (2010, text-fig. 10B)	-0.783209	-0.315195	0.50385	-0.826806	0.0662589	-0.0658979	-0.0664181	-0.147044	-0.0122522	0.104885	0.0292673	-0.00386686	0.0337794	0.0119879	-0.0198211	0.0348256	-0.0261247	0.0290025	-0.00352651	0.000929479	0.00216304	-0.0180432	-0.00919706	-0.000998932	-0.00127363	0.00257064	0.00306145	-0.0119731	0.00748087	-0.00758417	0.00262795	0.00364219	0.00334349	0.0113025	0.00138627	0.00129669	-0.0028802	-0.0027198	-0.00125282	0.00544473	-0.00154785	0.00328487	-0.00306076	-0.00251101	-0.0023266	-0.00672397	0.000918895	-0.00126094
Trimorphoceras crassilens	Ebbighausen et al. (2010, text-fig. 30I)	-0.813945	-0.324494	0.422824	-0.899713	0.0428014	-0.0222651	-0.0530992	-0.0856229	0.00414026	0.0798495	0.0326693	-0.00323057	0.0119181	0.00384857	-0.0137482	0.0391002	-0.0146026	0.0187107	-0.0124623	-0.0118806	-0.00278828	-0.016169	-0.0039677	-0.000807933	0.00574409	0.00346434	0.00104869	-0.00916531	0.00319698	-0.0021199	0.00788227	0.00679585	0.00180806	0.0059611	-0.00374495	0.00229692	-0.00565436	0.000551087	0.000317233	0.00136382	0.000790468	-0.00199024	-0.00368458	-0.00270448	-0.00106701	-0.00156365	0.00316803	-0.002648
Trimorphoceras crassilens	Ebbighausen et al. (2010, text-fig. 30J)	-0.90631	-0.28205	0.383641	-0.861446	0.0412332	-0.051082	-0.0820136	-0.114753	0.000455214	0.0713624	0.0445499	-0.0150785	0.0312226	-0.00303016	-0.00350213	0.033223	-0.0191798	0.0316942	-0.00414545	0.000382712	-0.00295744	-0.0119796	-0.0111923	0.00699857	-0.00600544	0.00212867	-0.00423726	-0.0118334	0.00242653	-0.00983123	0.00480012	0.00144524	0.00637107	0.00443037	0.00305192	-0.00286006	-0.00141995	-0.000518766	0.00310192	0.00483512	0.00112153	0.00514177	-0.00403924	0.000382386	-0.00504522	-0.00185132	-0.000646767	0.000494915
Trimorphoceras crassilens	Ebbighausen et al. (2010, text-fig. 30K)	-0.809877	-0.248361	0.361708	-0.924653	0.0510288	-0.016391	-0.0582691	-0.0838957	0.0184985	0.0860265	0.0281771	-0.00587728	0.0106425	0.00311474	-0.00978441	0.0427827	-0.00962988	0.0210201	-0.0158616	-0.00628787	-0.00848309	-0.0143071	-0.00181966	0.000457744	0.00876086	0.000723527	0.000219879	-0.0097766	-0.00123736	-0.00226364	0.00869397	0.00299579	0.00443239	0.00527332	-0.00326966	0.00432521	-0.00683233	0.00197173	0.000311533	0.00118096	0.000317396	-0.00297405	-0.00354121	-0.00064023	-0.00154343	-0.000564883	0.00189776	-0.0041114
[truncated: 72 more columns]

## Sheet: PCA VLS
		PC1	PC2		PC3	PC4	PC5	PC6	PC7	PC8	PC9	PC10	PC11	PC12	PC13	PC14	PC15	PC16	PC17	PC18	PC19	PC20	PC21	PC22	PC23	PC24	PC25	PC26	PC27	PC28	PC29	PC30	PC31	PC32	PC33	PC34	PC35	PC36	PC37	PC38	PC39	PC40	PC41	PC42	PC43	PC44	PC45	PC46	PC47
Ammonellipsites conradae	Ebbighausen et al. (2010, text-fig. 18B)	-0.93166	0.77472		-0.14699	1.9588	0.25641	-0.26829	-0.23575	-0.58875	-0.22785	-0.16508	0.89962	0.098885	-1.228	0.19523	0.50799	-1.4252	0.33485	-1.1605	0.88248	-1.1028	0.72888	-1.2877	1.4719	-0.71993	-1.6782	1.5834	1.2682	-1.7947	-1.492	-0.27375	-0.030118	0.25889	0.8719	-0.056063	0.34623	1.3696	-0.15044	0.52462	0.83768	0.5996	-0.34647	1.0504	0.65858	-1.4098	-1.3673	1.9307	-1.8738
Ammonellipsites menchikoffi	Ebbighausen et al. (2010, text-fig. 16B)	-1.9609	0.63635		-0.92576	2.297	-0.38241	1.1346	0.87828	-1.0744	-1.0717	0.030914	-0.97073	-2.5116	-2.8231	-0.57704	0.1204	2.1058	-1.7799	1.5599	1.0224	0.15303	-0.28305	1.1642	-2.7948	1.4077	3.0188	-1.2921	0.03942	1.1198	-1.0874	-3.5402	-2.5206	2.0697	2.9197	-0.26386	-0.86318	0.27657	0.13784	1.8498	0.14754	-0.55495	0.48923	1.2702	-0.06959	-0.48575	-0.4724	0.12467	-0.22546
Ammonellipsites menchikoffi	Ebbighausen et al. (2010, text-fig. 16C)	0.25099	1.2156		-0.39126	1.5056	0.2158	-1.1389	-0.83847	1.6059	-1.6895	0.047923	0.093347	1.1846	-1.495	0.35296	-0.94624	-0.46547	1.1485	2.3734	-0.036864	-1.7213	1.7961	-0.21125	1.3057	0.11775	-0.075406	0.34283	-0.22418	-0.63697	1.749	0.024144	0.54259	0.89474	0.6469	0.11109	-0.40079	-0.074506	-0.91733	2.6466	0.45292	0.46371	0.080042	-1.754	-0.23339	1.1714	0.59783	0.33501	2.6302
Arnsbergites arnsbergensis	Korn (1988, text-fig. 48B)	-0.44148	-0.02714		0.36229	0.057301	0.20693	-1.0483	-0.84449	-0.20122	-1.0881	1.0574	0.19231	1.2339	0.39514	-0.88392	0.98067	1.6407	1.1761	-0.19454	0.11876	-0.34687	1.216	0.57768	-1.6592	0.26166	0.15428	0.99637	0.72327	-1.2134	0.52348	0.4402	-1.8444	-0.33918	-0.40342	-0.079838	0.99997	0.091829	1.5106	-0.95123	0.30581	-0.25651	1.7686	-0.90925	-0.17336	-0.61411	0.019185	0.60996	0.43524
Arnsbergites ferrus	Korn & Ebbighausen (2008, text-fig. 31G)	0.22552	0.3552		0.67355	-0.22341	0.60242	-0.64674	-0.15377	-0.24521	-0.16409	0.78857	0.62082	-0.030136	-0.91638	0.34131	-0.5179	0.49829	-0.45163	1.3098	-0.12467	0.62773	-0.97223	1.701	0.055295	0.12306	-1.5743	-0.84536	0.83441	-0.32208	0.40248	-0.80295	-0.27838	-0.49159	-1.0377	0.07588	0.46615	-0.7071	-1.302	0.30229	-1.1277	-1.312	-1.0817	-0.81976	0.67373	-1.3143	1.1433	0.50964	0.43772
Arnsbergites proiecturus	Korn & Ebbighausen (2008, text-fig. 35C)	-0.21214	-0.69717		-0.19922	-0.88523	1.127	0.2676	-0.91871	0.17206	-0.81526	0.49239	0.98673	0.21435	0.22663	0.16257	1.0695	2.037	-1.2273	0.42489	0.72011	0.5908	0.28661	-0.79309	-0.125	-0.45529	0.089926	-0.30835	-0.03388	0.1973	1.5597	-0.070365	-0.098829	0.58095	-1.0655	-1.508	-0.42391	-0.16471	0.66184	0.42885	-0.32003	-0.6055	0.67397	-1.0846	-2.7817	0.26459	0.42751	-1.0947	-1.3935
Arnsbergites rufus	Korn & Ebbighausen (2008, text-fig. 38B)	0.88628	1.2568		0.66892	0.42794	1.4354	0.61555	0.075069	1.0937	-0.2251	0.23198	0.50657	-1.161	0.98496	-0.51123	1.2655	-0.58972	-0.69466	-0.16823	0.22846	-0.31537	1.3936	-3.4132	1.1248	0.93423	2.107	0.23851	-2.5718	-0.39748	-0.23508	0.50119	-0.69996	1.4057	-0.36723	-0.064922	1.775	-0.50284	-0.48853	0.62854	0.75832	1.5473	1.1494	-0.4402	1.7672	0.1695	-0.96641	0.50431	0.19788
Arnsbergites sphaericostriatus	Korn & Ebbighausen (2008, text-fig. 28D)	-1.102	1.123		-0.73622	0.76765	-0.39673	0.19357	0.48544	-0.59599	-1.0577	1.237	0.71003	-0.27617	-1.3139	-0.34157	0.42874	-0.40776	0.81763	-1.2548	0.45416	0.53608	0.030451	-1.2924	1.274	-1.2218	-1.0171	0.38623	-0.50847	-0.60182	-0.4895	1.1071	0.3186	-0.13354	-0.73709	-0.44553	-1.3653	-0.63441	-1.3957	1.461	-0.98754	0.74243	-0.45972	0.47018	-0.19243	0.2795	-0.64659	-0.62527	0.3337
Arnsbergites warslowensis	Korn & Ebbighausen (2008, text-fig. 26C)	-0.54423	0.27615		0.29013	-1.5341	-0.25386	-0.56048	0.49904	0.21966	-2.983	0.52446	0.89567	1.3	-0.79417	0.62434	0.51783	0.42623	0.43443	0.26977	0.19897	-1.0617	-0.024381	-0.42132	-0.4713	-0.29798	1.9938	0.38017	-0.06977	0.213	0.30186	1.3249	-1.4552	-1.9362	-0.9757	-0.93092	-0.34697	0.81039	0.21588	0.63563	-1.1099	-0.02753	0.076574	0.74197	0.57662	-0.93635	0.99771	0.022558	2.2758
Benimehlalites belkassemensis	Bockwinkel et al. (2010, text-fig. 32C)	0.035455	-1.6943		1.093	0.50236	-1.2256	-0.32285	-0.61583	1.7551	-0.79555	-0.61923	0.32792	-0.48199	0.20233	0.48189	-0.079002	-0.29799	1.3378	1.3331	0.48607	1.2501	0.30183	0.92545	-0.10771	-1.4042	-0.77297	-2.0008	-0.51571	-0.50012	-0.42143	-0.38378	-0.94883	0.74876	0.052928	1.9905	0.0026743	-1.4322	-0.54462	-0.35518	0.11557	-0.1579	-1.0697	-2.0572	2.3118	-0.39316	0.66468	2.6451	0.16969
Benimehlalites benimehlalensis	Bockwinkel et al. (2010, text-fig. 30B)	0.88957	-1.1485		-0.91859	-0.045274	1.5863	0.17362	-0.92007	-0.79305	-1.4988	-1.275	-0.04922	-0.98074	0.31036	0.65035	0.080179	-0.15021	2.0893	-1.8273	-0.1597	1.3511	-0.074692	-0.02491	-1.1866	0.32679	-0.016304	0.69959	-0.80927	-0.041301	-0.082743	-0.90341	0.56954	0.26439	-0.030063	0.95658	1.9447	-1.0678	-0.35588	0.89779	-1.1327	0.35762	-0.87991	1.9037	-0.68267	1.1677	-0.4469	0.07552	0.71308
Bollandites nitens	Bockwinkel et al. (2010, 20% extended)	0.86416	-0.97408		1.2596	1.1588	-1.5622	-0.87591	-1.1695	-0.22122	0.23983	0.21243	0.031472	-1.1931	0.49041	0.71994	-1.2946	1.5648	1.3553	0.71008	0.46321	-2.2277	-3.4228	0.16284	0.18513	-0.1373	0.43791	0.17958	-0.53985	0.27054	-0.085749	-0.71145	-0.29153	0.3187	-1.958	-0.31951	0.99353	-1.9458	-1.8845	-1.521	0.13373	0.54322	-0.84586	1.6234	0.14052	0.041866	-1.4692	0.63202	-0.41311
Bollandites nitens	Bockwinkel et al. (2010, text-fig. 15E)	1.2033	-1.2862		-0.76443	0.62813	1.2253	0.85796	-1.0789	-1.9214	1.2812	-1.6204	-0.3214	-0.29806	1.1083	0.05854	1.7745	-1.0311	1.4207	0.90427	1.1706	0.80116	-1.299	0.78214	-1.3648	0.92497	-0.52875	-0.26565	0.28413	-0.85009	-0.38184	1.5163	-0.46749	0.03342	0.6796	-0.34379	-0.0046858	2.1551	-0.31547	0.055859	-0.54714	0.49011	-0.5957	-0.014767	-1.0283	0.37523	1.8752	1.6106	1.2699
Bollandites nitens	Bockwinkel et al. (2010, text-fig. 15G)	-0.75008	-1.0121		0.84473	1.0669	-0.39181	-1.1216	0.23756	0.17816	-0.89674	-1.0718	0.63456	1.1873	-0.013488	0.057802	-1.1365	-1.3127	-0.26801	0.48738	-0.10899	-0.11603	-1.597	-0.22548	0.0029745	1.5585	0.25229	0.054763	-1.7664	0.72872	0.5485	-0.2092	0.27065	-0.83998	1.8147	-0.18502	1.3354	-0.068483	-1.2754	-2.1344	-0.6254	0.33328	0.44951	-0.30589	0.098867	2.4463	0.015609	-1.4045	0.82541
Bollandoceras mirrih	Bockwinkel et al. (2010, text-fig. 25D)	1.275	-1.0803		-0.319	-0.41542	1.7148	1.7497	-0.85312	-2.723	-0.69487	-1.6898	1.6749	0.056363	0.038069	1.756	-0.078051	-0.78512	1.7141	1.9466	0.46948	0.55329	0.16332	1.0964	0.23616	0.55104	0.11789	0.80644	-0.97318	0.64748	1.9736	-0.42714	1.4504	-0.96058	1.8121	-2.0865	-1.0339	1.4544	0.48401	1.0302	-0.052429	0.87052	0.82756	0.031377	1.0312	0.22095	0.090373	0.28359	-1.9475
Bollandoceras mirrih	Bockwinkel et al. (2010, text-fig. 25E)	-0.54866	-1.9279		-0.0050575	-0.39039	1.0872	0.70705	0.4979	1.9554	-1.4648	-1.3985	-0.24992	-0.018067	-0.15381	1.9318	-0.26931	-0.29373	0.89769	0.30732	-0.93144	0.087064	0.51226	-0.74168	-0.77855	-2.4222	-0.81531	-2.8749	-1.6753	-1.3483	-0.33506	-0.78279	-0.42234	-0.37036	1.7241	1.1261	0.34864	0.69716	0.78	-0.8442	-1.3102	0.10665	-1.9351	-0.80868	-1.6125	-0.10025	0.3583	-0.39388	-0.21024
Calygirtyoceras zrigatense	Klug et al. (2006, text-fig. 12)	0.6331	-1.1742		0.40661	-0.38036	0.67784	0.86271	-0.64077	-0.47262	0.84678	-3.0738	-0.62069	-0.80052	-1.1926	1.1582	-1.1643	-0.5934	-0.2087	-2.9737	0.38362	-0.73661	0.38148	0.23135	0.37617	-0.49717	0.74037	1.7307	-0.085119	-0.52265	0.71625	-0.35231	0.52468	0.01709	0.47992	-0.74594	-0.28617	-0.57528	0.97632	-0.48486	0.63135	-2.7632	0.57181	0.85012	-0.17672	-2.027	-0.36787	-0.63573	2.0644
Dzhaprakoceras dzazairense	Ebbighausen et al. (2010, text-fig. 42L)	-0.44893	-1.4173		-0.038625	1.3571	0.58298	-0.89954	1.6025	-0.11577	-0.19063	1.3082	1.6264	0.49469	0.66842	0.14832	1.7608	-0.15987	0.30872	-0.049271	-1.5277	-1.2425	0.83719	-1.0726	-1.1659	0.95575	0.92643	0.2201	-0.15623	-0.064768	-1.6582	0.27084	-0.28041	-2.1688	0.27705	1.0654	-1.4575	-0.79055	0.31246	-0.84623	-0.14472	-0.95249	-1.195	-0.28439	0.082659	-0.35977	0.52227	-0.40846	-1.8693
Eoglyphioceras minutum	Korn & Ebbighausen (2008, text-fig. 6B)	0.84805	-1.3906		-0.8152	0.81416	1.3789	-0.48346	0.29917	-0.40502	0.70197	1.2413	-0.030377	-1.1145	0.43224	-1.5285	0.28247	1.6512	1.2308	-1.6739	-0.081858	0.40328	-0.51251	-0.72403	0.37546	0.60396	0.13972	-0.62903	0.30042	0.90184	0.4829	-1.5208	0.65127	-1.4041	-1.3527	1.1117	-0.059473	-0.18656	0.19405	0.27001	-0.52741	-1.002	0.18132	0.57182	-0.19938	0.86681	0.56256	-0.082544	0.98472
Eurites commutatus	Ebbighausen et al. (2010, text-fig. 25G)	-1.3874	-1.3338		0.34332	1.328	-0.59664	-0.85263	1.1554	0.077859	-0.36097	-1.3039	0.61507	0.40636	0.70829	-2.2759	-0.14776	-2.3071	-0.29372	0.12275	-0.76716	2.1339	-1.3096	-0.99061	1.8973	1.6193	-0.71815	-0.4256	0.90987	2.6533	0.79767	0.40637	1.1068	0.32124	2.0031	0.15411	0.69901	-0.86961	0.30055	1.4302	-1.5342	0.040981	0.57656	-0.46958	-1.0867	-1.9951	-0.086402	0.76094	0.61256
Eurites pondus	Ebbighausen et al. (2010, text-fig. 26C)	-0.44127	-1.2026		-0.65309	0.93865	0.78865	-0.97855	-0.038465	0.4324	0.90965	0.22843	-1.5543	0.57039	0.95088	0.0032189	0.41175	-0.19548	-0.374	-0.49905	-0.18873	-0.87967	1.1245	2.0063	-0.36089	-0.043587	-0.38234	-0.58161	0.086191	-1.4985	-0.30684	0.078646	0.46319	0.75583	-0.2299	-0.04595	0.53031	0.54389	0.93919	-0.45101	0.69184	0.18151	2.4501	-0.48505	0.64794	-0.59605	-1.1957	-0.030649	0.85056
Eurites temertassetensis	Korn et al. (2010, text-fig. 8F)	-0.4812	-1.3739		-1.0361	0.51601	0.62887	-0.84387	1.4081	0.25972	1.0436	0.37153	-0.69554	0.90762	0.32608	-0.54366	-0.5109	-0.2805	-0.97194	-0.46163	-0.60281	-0.7402	0.35091	1.1041	0.41702	0.2898	0.2195	-0.17334	-0.72141	-0.22871	0.082969	-0.51819	0.62448	0.16614	-0.80081	-1.8757	1.1541	0.3168	-0.3164	0.89091	0.82932	0.63127	-0.76214	-0.76542	-0.73407	-0.70285	1.0309	-1.0713	-0.70625
Girtyoceras ibnkhaldouni	Korn & Ebbighausen (2008, text-fig. 10C)	1.0124	0.8762		-1.7414	-0.31532	-0.99373	0.030507	-1.6214	0.67279	-0.13134	-2.1934	0.60092	-0.053496	-1.3204	0.038956	-1.0652	-0.99239	-0.39226	-0.51302	-0.25366	-3.0981	1.0147	1.4072	-0.05454	0.19809	0.266	0.50875	2.2502	-0.4752	-0.61301	0.08838	0.83758	-0.45365	0.74179	2.1447	-0.81454	0.64838	-0.64309	1.007	-1.3197	-0.029777	-0.2201	-1.9481	-0.40781	0.6981	-0.20477	-0.34348	-0.95379
Girtyoceras luscinia	Korn & Ebbighausen (2008, text-fig. 8D)	-0.15259	-1.5501		-1.092	-1.8649	-1.4377	-2.044	1.6794	0.93763	-0.68946	-1.7258	1.27	-0.2427	-0.27157	0.5994	0.13117	-1.8946	-1.5972	0.85072	1.854	1.6598	-0.50606	1.0236	-0.56201	-0.68709	-0.5985	0.3924	-0.042375	-0.78193	0.60486	-0.95257	-0.97863	-1.5713	-0.16088	0.26085	-0.19611	-1.9414	-0.38144	0.55761	1.8062	0.58179	1.1652	0.27094	0.73016	-0.49011	0.52373	0.093551	0.016697
Goniatites americanus	Korn & Titus (2011, text-fig. 42B)	0.49772	-1.812	-1.812	0.93519	0.20499	-2.2363	0.62881	0.023103	1.7765	0.59664	0.27493	1.3766	-1.3788	-0.73176	-0.13123	1.5794	-0.5137	-0.074065	-1.424	0.51532	0.90609	0.021052	-0.21189	-0.5772	0.25926	0.078431	0.45004	0.55106	1.5929	0.46586	-0.2855	0.68361	0.23033	-0.34241	0.83439	0.17749	0.98656	-0.75492	0.015519	0.3166	-0.036954	1.5077	-1.3101	0.12492	-0.26269	-0.87779	-0.71639	-0.37759
Goniatites americanus	Korn & Titus (2011, text-fig. 42C)	0.15412	0.16948	0.16948	0.68157	0.6857	1.113	-0.27728	-0.64592	-0.15525	0.4108	0.78587	1.1028	0.0093817	-0.69841	0.3306	-0.27128	0.31341	-0.80953	0.23261	0.6488	0.81701	0.023661	-0.2288	-0.5277	0.5564	-0.20195	0.52135	1.1279	-0.94085	-0.47396	1.4049	0.11449	1.5696	0.17522	-1.2518	-0.096534	-2.2091	0.61727	-1.1199	-0.30438	-1.16	0.9963	-1.1286	0.47464	1.4204	-0.28045	-1.5544	1.3006
Goniatites americanus	Korn & Titus (2011, text-fig. 43G)	-1.7504	0.96881	0.96881	-0.447	1.0089	-1.0673	0.41493	-0.073065	-1.3096	-0.64295	-0.99788	-1.5828	-1.6935	-1.2399	-0.086773	-0.24772	0.31594	-0.51827	0.42172	0.17797	0.10731	0.96111	0.64199	-0.74751	0.056841	-0.11472	-0.24638	-1.6202	1.638	-0.21711	1.8715	1.1923	0.16695	-0.66564	0.96595	1.5535	0.71453	0.087304	-0.95535	-0.16211	-1.5067	-1.3486	-0.69164	0.66222	-0.46682	0.25128	-0.52028	1.1839
Goniatites americanus	Korn & Titus (2011, text-fig. 43H)	-0.048366	0.44421	0.44421	0.80096	0.18474	0.91286	-0.12684	-0.10106	0.48838	0.14035	-0.061228	-0.91927	0.40623	-1.0866	0.95277	0.23325	-0.68416	0.5621	0.25563	-0.5211	1.1394	-0.10204	-0.90057	-0.91045	0.016347	0.2147	0.96462	0.69264	-1.3135	1.1214	1.1347	-0.30494	0.18605	0.9664	-0.0083518	0.010521	-0.84357	-0.22236	-0.04833	0.53646	-1.3133	0.04905	1.0509	0.045786	1.5878	-1.2222	-0.48194	-0.90498
Goniatites americanus	Korn & Titus (2011, text-fig. 43I)	-0.72332	-0.012659	-0.012659	0.74579	-0.57201	0.56571	0.30887	0.68658	-0.41539	-0.57302	0.12712	0.888	1.187	-0.50864	0.54457	1.1941	0.39765	0.39802	0.27047	-0.46872	-1.3388	-1.0244	0.39737	-0.19519	-0.51794	0.88097	0.45652	-1.0754	0.3885	0.98187	0.14077	-0.57516	1.0857	-0.80466	-1.2502	1.2898	0.30619	0.70623	-0.5141	0.41557	0.1139	0.62223	-0.63387	-0.3697	1.0832	0.11758	0.086741	-0.4932
Goniatites americanus	Korn & Titus (2011, text-fig. 43J)	-0.46708	0.10198	0.10198	-0.29981	-1.3148	-0.006479	-0.1167	0.94673	-0.48176	1.9592	0.21392	0.70501	0.97801	-0.091124	-0.22723	-2.2525	0.77189	0.066164	-0.27132	0.52684	-1.2358	0.59856	1.7165	-0.34724	0.82965	-0.21882	-0.7852	-0.54113	1.4876	-0.73073	-0.32796	0.6649	-0.69492	-0.095534	-0.5255	0.36479	-0.37233	-1.1462	0.25276	0.45984	1.3399	0.1787	-1.777	-0.89494	-0.1757	-1.0665	-0.66011	-0.20672
Goniatites crenistria	Korn (1988, text-fig. 33A)	0.545	1.0087	1.0087	-0.24407	-0.2805	1.1111	0.86191	-1.0041	1.464	0.29677	-1.1097	-0.3449	-0.38325	0.061408	-1.8124	1.2124	-0.094902	0.7595	0.82498	-0.79294	0.093418	-0.84308	-0.67365	-0.39902	-1.1557	0.4398	0.62419	-0.41628	-1.21	0.086103	-1.7286	-1.2325	-0.33134	-1.8765	-0.36872	2.2769	-0.060183	-1.0853	1.4532	1.5624	-0.28953	0.12177	-0.90435	0.72692	-2.1745	1.3448	-0.55206	-0.67428
Goniatites crenistria	Korn (1988, text-fig. 33B)	-0.433	0.36825	0.36825	0.36525	-0.91268	0.39948	0.01556	0.88195	0.34888	0.38161	-0.29157	-1.5187	1.0082	-0.88735	0.76776	0.50388	-0.63021	0.30101	-0.2511	0.86705	-0.37609	-1.8181	1.1034	-1.2675	-0.33059	-0.040581	0.93904	0.99608	0.48277	1.1354	-0.294	0.32889	0.18135	-1.9158	-0.62759	0.78531	0.29593	0.76854	0.85632	-0.79883	-2.0458	-0.15234	-0.48972	0.20126	0.47571	-0.81995	0.8768	-0.5146
Goniatites crenistria	Korn (1988, text-fig. 33C)	0.19591	0.53963	0.53963	1.0383	-0.89009	0.8252	0.088466	0.78584	0.55516	0.44881	-0.26338	-1.9251	-0.22319	-0.74711	0.55337	-0.51178	-0.33232	0.46136	0.56207	-0.80909	0.68676	-0.27033	-0.070672	0.32889	0.0073339	-0.48538	0.072023	1.5052	-0.48977	0.50967	-0.32368	-0.082257	0.25196	-0.14573	0.89835	-0.71235	0.46446	-0.45956	0.66929	1.1184	-1.0371	-2.0233	-1.1144	0.5316	-0.047746	-0.23184	-1.1204	1.2347
Goniatites crenistria	Korn (1988, text-fig. 33D)	0.49753	0.24898	0.24898	1.6392	0.23327	1.0516	0.41153	0.10269	0.2024	0.25145	0.13697	-1.599	-1.0036	0.28101	0.82617	-0.15891	0.21136	-0.076927	0.23183	-0.16285	-0.42355	0.30762	0.18892	1.1492	1.082	-0.84651	0.9128	0.47031	0.90316	-0.33879	-0.37936	-1.1001	-1.2422	0.017666	0.79371	-0.96239	-0.66852	0.58167	-0.41982	0.53915	0.7715	0.31975	-0.16801	-0.55454	1.5138	0.19079	0.78427	0.35737
Goniatites crenistria	Korn (1988, text-fig. 33E)	0.35954	-0.070659	-0.070659	2.0973	-0.32403	1.0616	1.1826	0.45843	0.39232	0.40214	-0.34206	-2.4715	-0.87706	0.73418	0.99829	0.36246	0.33593	-1.6297	-0.096018	-0.46813	-1.0701	0.043969	-0.28647	1.581	-0.023673	0.22399	1.1721	0.21971	1.2578	1.1803	0.033939	-0.48862	-1.2477	0.50976	1.0306	-1.3358	0.56086	1.06	1.3445	2.5804	1.1223	-0.96685	-0.88862	-0.65365	1.0334	-0.77071	1.1874	-0.22029
Goniatites crenistria	Korn (1988, text-fig. 34A)	0.5048	-1.1718	-1.1718	3.5322	0.97759	-2.4951	2.4016	-0.30621	2.4498	0.47213	0.87851	0.3344	-0.57525	-0.73413	-1.387	-0.36985	-0.42833	1.792	-0.6765	1.7413	0.34201	2.5889	2.508	1.7979	0.54754	1.442	-1.6789	1.214	-1.3813	0.50297	0.92722	-1.0342	-0.68625	-0.25117	-3.3844	0.75443	0.97741	1.1657	0.10034	-0.87861	0.52867	-1.9515	2.1224	-0.78267	0.78062	0.1117	-0.5627	-0.032376
Goniatites crenistria	Korn (1988, text-fig. 34B)	0.11491	-0.20976	-0.20976	1.5304	0.36599	0.81869	0.079555	-0.96925	0.27625	0.099222	0.35766	-1.0478	0.04967	0.14907	-0.70823	-0.047722	1.7021	-0.79219	-0.038479	0.07403	0.13393	0.70309	-0.93936	0.53287	0.69231	-0.93569	-0.98456	0.75799	-0.56062	-0.0029178	0.47378	-0.58286	0.19728	0.50183	0.41984	-1.0076	-0.25372	-0.26315	-0.97644	0.757	0.56356	1.7595	-0.21196	-0.27398	-0.65631	2.0143	1.2675	-0.9917
Goniatites crenistria	Korn (1988, text-fig. 34C)	-0.89789	-0.27582	-0.27582	1.2659	-0.34797	-0.13158	-0.13296	-0.18544	-0.59875	1.8618	-1.2641	0.18115	1.5106	0.77446	-1.2432	-0.081584	0.70261	-0.43505	-0.18642	0.044682	-0.61998	-0.39919	-0.2516	-1.1714	-0.030988	0.48525	0.55078	-0.72436	0.32951	0.18614	-0.11094	-0.59022	-0.30465	0.36305	-0.77563	-0.22117	1.6638	1.443	-0.21818	-0.002872	-0.40883	-1.3906	-0.84256	1.581	1.178	-1.2129	0.59709	-0.80696
Goniatites crenistria	Korn (1988, text-fig. 34D)	-0.61181	-0.72986	-0.72986	1.6095	-0.55935	0.094779	0.1715	1.0339	0.67223	-0.55573	-0.5558	1.2658	1.4286	-0.80388	-1.1664	0.80352	0.41622	1.874	1.8375	0.52085	0.38213	0.70539	0.66043	-1.673	0.35471	-0.26647	1.8218	-0.37669	0.44579	-0.94576	0.58411	1.1786	0.20883	-1.2252	2.7217	-1.0668	-0.078861	0.27228	1.0399	1.1198	-0.40053	1.9809	1.2967	-1.1128	1.0288	-0.58292	-0.021374	-0.11767
Goniatites crenistria	Korn (1988, text-fig. 34E)	-0.49185	-0.26942	-0.26942	1.1877	-0.56989	0.062276	-0.46308	0.16154	0.324	-0.30304	-0.9519	-1.0534	1.4166	-0.40424	-0.63965	0.26055	0.33795	-0.83395	0.64598	-0.0405	-0.48993	-1.1616	-0.06322	-1.3092	-0.70574	0.3373	0.68529	0.13033	-0.55453	0.23029	0.82166	-0.18276	-0.50694	-0.99737	-0.92534	-0.16239	-0.14643	-0.6334	-0.18114	-0.37957	-0.99603	-0.90949	0.10369	-0.46793	-0.12561	-0.31283	-0.072903	-0.61198
Goniatites crenistria	Korn & Ebbighausen (2008, text-fig. 18C)	0.77509	0.56449	0.56449	-0.045766	-1.2463	0.23503	-0.65705	0.69075	-0.32074	2.1741	0.20812	-0.30696	-0.74237	-0.88335	-0.95715	-0.43649	0.24299	1.9066	0.58235	-1.5539	1.4293	0.036736	-1.082	0.06501	-0.41853	0.83433	-0.012272	0.48	0.69563	0.0071653	-0.96197	0.47377	0.11774	0.70544	-0.79339	-0.9713	-0.10782	1.2459	-2.4155	0.1356	1.6111	0.7179	1.19	-0.40331	0.050301	0.8301	0.9752	1.7261
Goniatites deceptus	Korn & Titus (2011, text-fig. 48D)	0.46724	-1.8302	-1.8302	0.95521	0.2057	-2.2422	0.65564	0.030279	1.8713	0.59794	0.27914	1.3913	-1.3701	-0.77146	-0.1597	1.6037	-0.57303	-0.080857	-1.4793	0.58522	1.0428	0.081388	-0.2283	-0.55661	0.19985	0.092506	0.24422	0.64962	1.5255	0.67359	-0.088801	0.54617	0.067121	0.013519	0.87893	0.19584	1.2815	-0.4479	-0.003684	0.47467	-0.23297	1.5891	-1.2602	0.097838	-0.39729	-0.77695	-0.78411	-0.49124
Goniatites deceptus	Korn & Titus (2011, text-fig. 48E)	-0.64528	0.94448	0.94448	0.58106	0.83069	-0.0080544	-0.82887	-1.5421	-0.53008	-0.71427	0.28608	0.25612	1.0945	-0.08648	0.31287	-0.33964	-1.1209	1.1508	-0.16271	-0.63671	-0.022608	0.17207	0.76319	0.12889	1.0547	0.42496	-0.041595	0.15807	-0.017956	-1.3886	-0.83952	-0.39294	-0.15256	0.050887	0.39603	-0.063494	-0.032526	0.51338	-1.3692	-0.26817	-0.065148	0.54668	-1.025	-0.79733	0.34278	0.18972	-0.1572	-0.0095619
Goniatites deceptus	Korn & Titus (2011, text-fig. 48F)	-0.38071	0.29836	0.29836	0.52743	-0.59355	0.31888	-0.29465	-0.62257	-0.51826	-0.048554	0.012997	0.58893	1.0795	-0.4672	0.92596	0.36488	0.068465	-0.63764	-0.30052	-0.16931	0.10614	0.88133	0.040394	-0.53359	0.90963	1.1398	-0.77143	-0.7777	0.46166	0.72939	0.40891	0.65151	-0.32867	-0.3987	-0.17412	0.86942	-0.71698	-1.2961	-0.031186	-0.025401	0.71333	0.54506	1.5945	0.12356	-0.13844	-0.26793	1.5254	-1.5159
Goniatites deceptus	Korn & Titus (2011, text-fig. 50E)	-0.38816	0.91088	0.91088	0.33997	-0.26435	1.093	0.62918	-0.96626	1.4474	0.28186	0.26583	-0.56126	0.97534	-0.24005	-0.98882	-0.91413	-0.3232	-0.11448	0.95113	0.95586	1.5261	-1.1952	-1.0322	-1.2163	-0.70427	0.2868	-0.8865	0.4848	-1.1085	-1.5533	-0.15858	1.1325	-0.74475	-1.0169	0.088068	-0.46311	1.6613	-1.1702	1.405	-0.85491	0.50565	0.54039	0.86933	0.18737	-1.5226	0.058095	0.75875	0.3785
Goniatites deceptus	Korn & Titus (2011, text-fig. 50F)	-1.0862	0.49195	0.49195	0.27018	-0.26041	-0.04142	0.04823	-1.8614	-0.268	0.18802	-0.40666	-0.63007	1.2237	1.5207	-0.14685	-1.3601	-0.083758	0.65966	-0.24623	-0.052837	0.147	0.018237	0.96673	0.83249	0.9673	1.187	-1.3359	-0.60191	0.36836	-0.39115	0.41345	-0.95524	-0.87733	0.91748	1.1345	-0.19144	-1.7438	0.27366	-0.76839	1.6947	-0.51849	0.054057	0.17968	-0.76779	-2.4679	-0.0075145	-1.776	0.54061
Goniatites deceptus	Korn & Titus (2011, text-fig. 50G)	-0.76814	1.0527	1.0527	0.4992	-0.49845	0.35891	0.44962	-0.91587	-0.34085	0.42131	0.35572	0.88009	1.0316	0.28026	0.52838	-0.34167	-1.3036	-0.7602	-0.32393	-0.89161	0.76723	-0.45378	0.27237	-0.22913	0.16061	2.424	-1.5457	0.32985	1.2525	-1.1006	-0.31926	1.4168	-0.50781	-0.88814	0.54198	-0.23708	0.061562	0.78579	0.44287	-0.43252	0.63164	-1.8528	-0.72838	0.79877	1.4019	-0.77137	0.69688	0.019729
Goniatites eganensis	Korn & Titus (2011, text-fig. 53B)	-1.6693	0.083021	0.083021	1.0448	-0.04735	0.12199	0.93028	-0.69337	-0.088159	-1.5589	-0.77258	-0.56957	1.3372	1.1593	-1.3682	-0.86087	0.67606	0.51977	0.21402	0.34034	-0.85583	-2.2732	-1.1086	1.0226	-1.2987	-0.13826	0.26754	1.5633	0.39752	-0.81557	0.44962	-0.13732	0.35749	1.2864	0.96498	0.73661	-0.55586	3.2713	1.0121	-1.4224	-0.12271	0.47624	0.37838	-0.58429	-0.25962	-0.088727	-2.0124	0.33699
Goniatites eganensis	Korn & Titus (2011, text-fig. 53C)	-1.6604	0.37471	0.37471	-0.33037	0.25217	0.74997	1.9605	-0.52638	0.20448	-0.18363	1.1067	0.71026	0.13762	0.86029	-0.076389	-0.3041	0.48241	-0.57488	-1.215	1.7015	0.44793	-2.6775	-0.90756	0.45805	-0.31611	-1.3184	-0.4947	2.5397	-0.10471	0.80577	-1.6107	1.1561	-0.57156	0.32043	0.50008	0.95375	-0.43497	0.55561	-0.36551	-0.61712	0.90015	0.66225	0.44624	-0.030301	0.8421	1.0339	1.289	-0.1322
Goniatites eganensis	Korn & Titus (2011, text-fig. 53D)	-1.7278	0.49073	0.49073	-0.095349	0.6124	-0.46524	0.65435	-0.57814	-1.1209	-0.90154	-0.2882	-0.56997	-0.93465	0.69321	-0.3086	0.43722	1.3473	0.4395	0.081273	-0.026004	-0.43517	1.654	-0.39506	-0.26993	-0.13184	-1.6594	0.48269	0.41654	-0.46801	0.55893	0.4506	1.4948	-1.0614	-0.48378	0.47764	2.2218	0.91233	-0.24062	-1.2655	-0.18925	-0.2056	-0.059598	0.42189	0.011408	-1.5781	-0.19534	-0.063467	-1.4568
Goniatites eganensis	Korn & Titus (2011, text-fig. 54C)	0.60978	0.094595	0.094595	1.2486	0.18099	-0.58336	-1.5297	-2.3977	-1.0877	0.40333	-0.89101	-0.55939	-0.5728	0.62626	1.354	-0.12206	0.028772	-2.438	0.063415	-0.096808	0.23392	1.6056	0.33411	0.18448	0.43454	-0.92926	-0.3108	1.2869	1.191	-0.73561	-0.31738	0.10937	-0.33071	-0.76332	0.36405	0.94338	-0.83709	0.72061	2.2121	0.626	-0.12729	-0.53612	0.69119	1.2696	2.1353	1.7633	-0.40239	-1.4427
Goniatites eganensis	Korn & Titus (2011, text-fig. 54D)	0.11901	0.33803	0.33803	1.3207	-0.034112	1.2719	0.41732	-0.2009	0.019037	-0.38763	0.86946	-0.026171	-0.088025	-0.13899	1.1528	1.1396	0.22258	-1.0336	0.1197	-0.13548	0.86078	0.98806	-0.48208	-0.63325	1.1042	-0.9312	0.69581	0.21182	-0.48248	0.99596	-0.33833	0.44624	0.56247	0.46013	1.5542	1.2319	-0.25772	0.27956	1.4641	-1.227	1.6142	-0.76261	0.24271	-0.72463	-0.14575	1.3111	-0.78565	-0.58025
Goniatites eganensis	Korn & Titus (2011, text-fig. 57E)	0.29805	0.40054	0.40054	0.92892	0.89278	0.37792	-1.044	-2.4667	-0.45864	0.8978	0.19148	0.72443	-0.10741	0.59991	0.40559	0.19563	0.055684	-0.71252	0.42863	0.93093	1.4781	1.1598	-1.3286	-0.93857	0.99874	-0.2093	-0.14389	0.12985	-0.49308	-0.85083	0.105	0.78256	0.56236	-0.33695	-1.5827	-0.49347	-1.0836	-0.39004	0.21	-1.7277	-1.5225	0.30122	-0.81778	1.2986	0.75603	0.63143	-0.70833	1.3766
Goniatites eganensis	Korn & Titus (2011, text-fig. 58C)	-1.1481	0.49261	0.49261	-0.28413	-0.50177	-0.32683	0.42944	0.044798	-1.258	-0.17671	0.59065	2.0765	-0.27969	0.70819	0.5573	-0.33774	0.50353	-0.72307	-0.99332	-0.78515	-0.60801	-0.0024163	0.57714	1.3201	-1.5035	-0.20566	-1.6346	0.14157	0.35453	1.2477	1.9348	-1.3421	0.10841	1.3012	1.3563	0.74648	0.18589	-0.4371	0.23317	-0.3219	-1.458	0.92936	1.0965	0.3802	0.16724	0.27204	-0.54069	-1.4802
Goniatites evelinae	Klug et al. (2006, text-fig. 26D)	-0.8252	1.6905	1.6905	0.59615	0.43877	-0.53075	-0.47218	-0.62749	-0.23628	1.17	-0.45182	-0.59666	0.48148	0.64726	-0.42126	1.0587	-2.469	0.42085	0.041579	-1.5912	0.49223	-1.0955	-0.58161	-0.065148	-0.49622	0.52293	-1.1992	-0.054842	-0.23162	-0.97238	-0.65289	-0.51168	1.0748	-0.88633	-1.5859	-0.51317	1.6176	-1.66	0.12311	-0.0081678	-1.1981	-0.36816	0.022117	-2.059	-0.31974	1.3948	0.23279	-1.1107
Goniatites gerberi	Klug et al. (2006, text-fig. 24F)	-0.78753	0.93602	0.93602	0.18601	-0.21152	-0.2576	-0.1372	-0.21107	-0.86818	1.6136	-0.11266	0.70602	0.10016	0.36122	0.28106	0.35867	-0.64116	1.1705	-1.5272	-0.83671	0.632	0.093381	0.68457	-0.74795	-1.5977	-0.70483	-0.94249	-0.63379	-0.34941	-0.44781	-1.4582	-1.7617	1.1937	-0.35763	-0.66262	-1.833	-0.77034	0.6248	0.52702	0.24818	1.5376	-0.091641	-0.33608	-0.35139	1.7932	0.26048	0.27453	0.30383
Goniatites gerberi	unpubished	-1.2974	0.67576		0.042981	-0.3142	-0.54088	0.3369	-0.13165	-1.1692	1.4119	-0.51849	0.27054	-0.61963	1.1289	0.086646	-0.28361	0.74508	0.68464	-1.1777	-0.53901	0.31004	0.77859	0.17284	-0.19547	-1.5669	-1.2853	-1.5129	-0.2314	-1.1097	1.6012	0.50087	-1.3913	-0.44212	0.60744	0.58006	-0.88309	-0.7424	-0.92878	1.5281	0.28887	0.52874	1.2117	-0.46022	0.5034	0.64983	-1.2651	-0.71465	-0.36277
Goniatites gerberi	unpubished	0.47468	0.19177		0.60066	0.4711	1.3387	-0.022525	-0.041961	-0.51331	0.49509	0.94575	2.0826	-0.49079	-1.0924	0.76565	-0.91033	0.18892	-0.31613	1.2607	0.34677	0.19326	0.23244	0.91968	1.076	-0.37244	-0.8088	0.059671	-0.58442	0.20273	-0.72786	0.42483	0.67812	1.1749	0.5611	-0.76559	-0.2886	-0.85205	-0.31669	-1.8595	-1.0251	-0.33101	-0.35526	-1.0547	1.3641	-1.3802	-0.42282	0.4043	0.68582
Goniatites globostriatus	Korn & Ebbighausen (2008, text-fig. 25)	0.97852	0.56464	0.56464	-0.20979	-0.76527	-0.15141	-1.3826	0.51368	-0.48943	0.27661	0.56978	0.25925	-0.74077	-1.9123	-0.57324	-0.64157	-0.1011	0.17235	0.86389	0.053003	0.072745	-0.89151	0.68575	1.8022	0.31655	-0.81421	0.38523	1.5601	0.66435	-2.3337	-1.0972	-0.23957	-1.4986	-1.3032	-0.47489	0.026093	0.16402	1.2415	0.013352	-0.3407	0.4352	-0.21907	0.78241	1.7976	-0.35435	0.20772	-0.23622	-1.8597
Goniatites hudsoni	Korn & Tilsley (2006, text-fig. 24B)	-0.98995	0.64087	0.64087	0.33735	0.42196	-0.81491	-1.0241	0.3091	-1.2006	0.30851	-0.68635	-1.1251	0.53118	-0.35931	-0.84359	0.30901	-0.53859	0.91602	-1.3496	-0.70301	-0.50483	-0.27211	0.12327	1.3458	-0.51653	-1.4865	0.19113	-0.10475	1.1326	0.43949	1.2872	-1.1248	2.834	0.28618	-1.396	0.072212	-0.716	-0.71713	1.2274	-0.64532	-0.38413	-0.26909	-0.26081	-0.30545	-0.44933	-1.3973	0.46282	-0.59423
Goniatites hudsoni	Korn & Tilsley (2006, text-fig. 24C)	-0.46731	0.4102	0.4102	0.39939	-0.77939	0.38729	-0.022458	0.46279	-0.062772	0.086255	0.067535	0.30882	1.0585	-1.1479	0.64914	-0.43105	-0.14737	-0.17126	-1.9307	-0.030919	0.0044192	0.30093	-0.24007	-1.3657	-0.014692	0.52184	-0.21064	0.066526	-0.25558	0.81506	-0.8551	0.19067	0.53562	-0.68479	0.12736	0.41377	-0.17797	0.19381	-0.91012	0.60938	2.2678	-0.15043	-1.1204	-0.014605	-0.49559	0.29813	0.78149	0.68437
Goniatites moorei	Korn & Tilsley (2006, text-fig. 26D)	2.6245	1.5416	1.5416	0.060609	0.84304	-0.30063	-0.12414	2.6856	-0.697	-1.4981	-0.44718	-0.86988	0.24069	1.5735	0.24225	-1.1063	-2.4675	0.95924	0.033418	3.3604	-1.9154	0.72466	-2.4681	-0.51403	1.1877	-0.94012	-2.768	-0.58249	0.68655	1.7616	-1.8552	-0.55552	1.0801	-2.1829	0.29274	-1.6958	0.78135	1.8251	-0.94429	-1.5703	-1.5793	0.82828	-0.26073	0.94429	-0.084487	-0.5618	-0.7853	-1.187
Goniatites moorei	Korn & Tilsley (2006, text-fig. 26E)	0.8513	0.12416	0.12416	1.3784	-0.48787	-0.5652	-1.2925	0.9515	-0.78423	0.38139	-0.07007	-0.10789	-0.76772	-1.4765	0.73657	-0.29391	0.80023	0.22732	0.79343	-2.1093	-1.4839	0.5501	-0.091557	0.524	1.2856	-2.2226	-0.0026888	-0.099002	0.59327	-0.22783	0.0069504	-1.1228	1.1043	0.41793	-0.11929	0.72501	2.5426	-1.1376	-1.3956	-0.88818	-0.31772	2.4804	0.24415	-1.587	-0.10301	2.0996	0.53345	0.19378
Goniatites moorei	Korn & Tilsley (2006, text-fig. 26F)	0.24204	0.7358	0.7358	1.3061	0.59534	0.43733	-0.74327	1.4119	-0.22545	0.75941	1.0793	0.028183	-0.099226	-0.87522	0.93455	0.53338	-1.0529	-1.4899	-0.96168	-0.15973	0.59987	-0.68819	0.3245	-1.0422	1.5147	-1.0821	1.155	-1.1166	-1.2786	1.7873	0.24467	-1.7462	-0.50085	0.14145	1.2242	0.82941	-0.31102	-1.9108	-0.75617	-0.92906	0.32848	-2.3563	0.71024	-1.5572	-1.3356	-1.1876	0.1371	-0.39892
Goniatites rodioni	Klug et al. (2006, text-fig. 21F)	-1.4281	1.2089	1.2089	-0.54559	-0.21879	-0.86831	0.95837	1.3776	-0.88387	1.0625	-0.18726	-0.56807	-1.4996	-0.45761	0.45986	0.00065961	0.25088	1.0033	-0.38222	0.68395	-0.1542	0.037388	-0.37382	-0.36544	-0.40255	-0.48393	-0.58592	-0.51575	-0.35414	0.27557	1.6086	0.13617	-1.8284	-1.0671	-0.22749	-1.113	-0.66156	-0.80627	0.65547	-0.63835	1.1246	1.0672	0.036999	1.1125	1.0529	1.4338	-0.96317	1.3335
Goniatites rodioni	unpubished	-1.5692	1.1419		-0.60016	-0.2791	-0.95423	1.1662	1.4052	-0.90687	1.1159	-0.2312	-0.71369	-1.8084	-0.1952	0.42421	-0.22654	0.76498	0.80959	-0.091557	0.67639	-0.0012053	0.013702	-0.28805	-0.98904	0.071224	-0.13275	-0.71356	-0.57494	-0.1706	0.83061	1.4706	-0.028477	-2.0814	-0.66913	0.45905	0.087035	-0.38092	-0.58944	0.35442	-0.07786	0.1604	0.40009	-0.18618	0.97443	0.31969	1.3808	-0.9551	0.86854
Goniatites sphaericus	Korn (1988, text-fig. 38A)	1.388	0.71388	0.71388	0.82845	-0.19639	0.15674	-0.65673	-0.37581	-0.54687	-0.072318	-0.32203	-0.99898	-1.6179	0.50059	-1.0664	-0.23282	-0.98227	-0.054403	-1.2612	-0.258	0.7061	-0.59007	-0.18392	0.25711	1.9267	0.6223	1.2482	-1.105	-1.7489	-1.5532	-0.94059	-0.81811	-2.1542	0.37216	0.18723	-1.2079	-0.72997	-0.71019	0.89528	-1.8189	0.43928	0.92728	-0.76948	-2.02	-0.012322	-1.4195	-1.1032	0.23862
Goniatites sphaericus	Korn (1988, text-fig. 38B)	-1.1531	-0.45306	-0.45306	1.2386	-0.078047	-0.071927	0.30559	1.0618	-0.52555	0.61291	-1.0758	1.4701	0.89182	0.040871	-1.242	1.6333	0.020001	0.33425	-0.15053	0.4997	-0.50566	-0.30782	-0.44535	0.10452	-0.84653	-0.62894	2.071	-0.32938	0.96424	-1.6381	0.32913	-1.0766	2.1557	0.41166	0.22606	-1.8863	-1.6881	0.29543	-0.26127	1.3469	-0.1703	-1.136	0.046068	1.3559	0.16836	1.7424	-0.27951	0.38729
Goniatites stenumbilicatus	Klug et al. (2006, text-fig. 28B)	-1.6519	-0.16338	-0.16338	-0.33369	-1.9424	-0.98023	1.2795	1.1487	-0.14323	0.043445	-0.73273	1.9445	-0.84246	2.9675	0.88602	-1.2054	0.039603	0.32503	1.4697	-0.85354	-0.1152	1.2872	-1.3317	2.1955	2.4986	1.5671	0.41772	0.58851	-2.1892	-0.65324	-0.89602	0.19081	1.4247	-0.38829	0.86652	-0.57262	0.87384	-1.0139	-0.03649	1.3671	-1.3924	-1.3166	1.5909	0.24391	-1.0175	-0.037123	0.37483	1.2409
Goniatites stenumbilicatus	unpubished	0.7292	1.2669		0.3124	-0.6902	0.68728	-0.078853	0.8439	0.68505	-0.18061	1.1468	0.40244	-0.84126	-0.526	-0.10991	-1.9728	-0.56974	1.9807	1.6969	-2.9233	1.366	0.6455	-0.56535	-0.84386	-1.0822	0.20473	1.3713	1.1065	0.95692	0.12266	-0.34689	-0.63414	-1.1609	1.5654	-0.7683	1.9045	0.91387	0.20745	0.011921	0.15977	-0.033774	-0.00010801	-0.11218	1.6567	0.11482	-0.99603	-2.8985	-1.5215
Gourarites hagaraswad	Bockwinkel et al. (2010, text-fig. 40D)	-0.55111	-1.1915		-1.4316	-0.45941	1.6124	2.2718	0.31022	2.4445	-1.1398	-0.41439	-1.3513	-0.48056	-1.0668	3.017	-0.22346	-0.53648	0.43648	-0.71255	-0.14406	-0.69782	-0.71898	-0.61223	0.98015	0.1631	-0.49413	-0.9197	0.32383	1.5044	-2.9639	0.91328	-0.15031	1.7667	-0.9268	-0.6934	0.5377	-0.59129	-1.2307	-1.3497	0.892	0.64712	1.1766	1.2084	-0.56853	1.2484	1.1488	-1.1529	-1.1019
Gourarites mustari	Bockwinkel et al. (2010, text-fig. 44F)	1.3429	-1.2063		-1.8163	-0.053411	-0.41754	1.4078	-0.86505	-1.3511	-1.049	0.35502	-1.4647	0.47936	0.49078	0.80979	1.1678	-1.4632	0.27385	0.99651	-0.767	0.983	-0.54802	0.75457	-0.19321	1.2677	-0.10484	-0.59729	0.54959	0.48493	-1.9706	2.7964	-1.4615	0.015164	-1.1139	-0.85248	-0.21997	-0.91727	-0.2881	0.45737	1.1278	-0.41565	1.1392	0.60959	0.84563	-0.46679	-1.9134	0.14056	-0.43167
Hammatocyclus pollex	Ebbighausen et al. (2010, text-fig. 7J)	-1.4979	0.69662		-0.58035	2.6805	0.10497	0.16521	-0.40105	-0.73552	-1.218	0.11822	-0.24605	-1.4673	-1.6624	0.0064914	1.1145	-0.94309	-0.82614	0.16282	0.53731	0.07233	0.15736	-0.52909	0.0352	-1.4067	0.30737	-0.21087	0.080253	-1.6409	-0.72453	-0.11715	2.5149	-1.9528	-0.0024086	-0.96478	-0.35359	-0.049435	1.2562	-2.8508	1.9305	0.25586	-0.5536	-1.6979	-0.77373	0.33951	-1.527	0.92192	-0.076869
Hibernicoceras artilobatum	Korn & Ebbighausen (2008, text-fig. 44E)	-0.72975	0.51378		0.34038	-0.347	0.16482	-0.15571	-0.47925	-0.43804	-0.37039	0.3395	0.66507	1.1364	-0.1871	0.1604	-0.6143	-0.01603	-0.3414	-0.87086	0.33461	-0.68887	-0.21244	0.93165	0.4243	1.3314	0.32572	-1.3476	0.27571	0.36063	-1.0917	-0.54896	-0.13551	-0.20413	-1.3005	1.6559	0.59937	1.4573	0.0049473	-0.15737	0.45374	1.5874	0.81722	-0.36367	-0.84766	-0.43989	1.0841	-0.06158	0.60454
Hibernicoceras carraunense	Korn & Ebbighausen (2008, text-fig. 40F)	-0.77521	0.16075		-1.098	-0.51795	0.16496	0.75396	0.43751	0.16832	-0.10524	1.3308	0.97973	0.79661	-0.32872	0.9587	-0.071339	-0.18356	-0.29823	-1.3028	1.159	-0.18571	-0.71597	-0.27477	1.0878	1.46	0.69036	1.0702	-0.42408	0.60206	0.62315	-0.63972	-0.97213	0.15326	-0.26232	-0.28117	0.48323	0.57549	-0.41594	0.04722	1.1885	-1.2747	-1.7351	-1.116	0.4288	0.75914	1.0279	0.43485	-0.25688
Hibernicoceras touissitense	Korn & Ebbighausen (2008, text-fig. 42F)	0.3112	0.23621		-0.48142	-0.92176	0.40079	-0.3827	0.052993	-0.33157	0.080492	0.47916	1.6492	0.024719	-1.9785	1.019	-0.91894	-0.033634	-0.44563	0.13356	-0.033342	0.72597	0.1031	0.41689	0.63205	-1.1869	0.11318	-0.31839	-1.0121	0.69105	0.52631	1.27	0.33521	0.29439	-0.75825	0.73024	-1.575	0.61862	1.4432	0.64823	-0.5697	-0.7362	0.22818	2.1793	-1.0804	-0.67496	-0.73902	2.0203	-0.39201
Hypergoniatites fusiger	Klug et al. (2006, text-fig. 30D)	1.1487	3.0185		-0.1977	0.88701	-1.1073	0.1368	0.24354	3.5375	-1.7343	-0.88076	0.94528	-0.20685	1.3217	1.2147	0.98487	2.7343	-0.40923	-1.619	-2.8429	0.47203	-2.2733	1.7398	-0.51635	2.699	-2.3835	-0.69503	-2.2677	-0.13798	-0.54094	0.86673	1.5853	-0.61789	0.45964	-1.7934	-1.3203	0.3325	2.2419	1.3582	0.35893	-0.31318	0.13366	0.31668	1.2853	-1.0451	-0.5244	0.80528	0.47119
Itimaites parabolicus	Klug et al. (2006, text-fig. 10B)	-0.44812	-1.6442		-0.67662	-0.20724	0.51854	-0.79325	0.73186	1.0436	0.18605	-0.69989	-1.0758	0.67168	0.67457	-0.99356	-1.0331	0.27554	-1.5985	0.66545	-0.18244	0.42549	0.084222	-0.15296	-0.17084	-0.61596	-0.35068	-0.95147	-0.65674	-0.41572	-0.53899	0.11593	0.47767	-0.29504	0.11393	-1.5723	-0.9903	0.44588	-1.6335	0.88122	-0.62941	1.0907	0.12859	0.89382	0.67104	1.3242	-1.0095	0.14528	-1.0774
Lusitanites circularis	Korn & Ebbighausen (2008, text-fig. 67B)	1.5281	-1.2149		-1.4235	-0.25292	0.16724	1.3127	0.263	-1.5515	-1.7409	1.2402	-0.4964	0.81801	-0.28752	-1.3902	-1.0309	0.29068	0.60801	-0.82812	-0.96281	1.7208	0.18978	-0.33296	-0.65612	0.66685	-0.63244	-0.90891	0.77654	0.1483	0.32414	0.91149	-1.3711	0.37562	-0.50739	-0.11904	-1.1095	0.7749	-0.10392	-0.27456	1.7475	0.68315	-0.57989	-2.5724	-0.4435	-1.4161	-1.0638	-1.0266	-0.54905
Lusitanoceras zirari	Korn & Ebbighausen (2008, text-fig. 50F)	1.6901	-0.36589		-0.50601	-2.0133	0.082736	-1.1487	1.1975	-1.577	-1.792	0.32242	-0.61777	-0.91953	-1.3292	-2.8375	2.1611	0.44544	0.2061	-0.5729	-0.17256	-0.16779	-1.9302	1.2966	2.5889	0.46539	0.87147	-1.7751	0.2265	-2.6756	-0.23853	0.91454	0.098737	0.36885	0.97243	1.4919	1.1343	0.84891	0.14757	0.0017217	0.95561	-1.3928	-0.32998	-0.47372	0.74793	2.8711	0.12094	0.85376	0.65394
Muensteroceras fabrei	Ebbighausen et al. (2010, text-fig. 21E)	0.47385	-1.6014		-0.48995	0.65073	0.28808	-1.2435	0.77311	0.064621	0.34271	0.91708	0.30192	-0.7401	0.47433	0.094722	-0.030831	1.5551	0.24272	0.024072	-0.87394	-0.57435	-0.012012	-1.9875	-0.69343	-0.83998	-0.099804	-0.19679	0.60167	1.3822	-0.044461	0.83802	-0.055834	0.25052	-0.1805	0.029089	0.6128	0.74991	0.60651	0.96072	-0.54294	0.28196	-2.4729	0.51165	0.68553	-0.10005	-0.35676	-0.50337	1.0671
Neogoniatites worki	Klug et al. (2006, text-fig. 33B)	0.082913	0.88202		0.84571	-2.0193	0.41514	0.1337	1.354	0.16679	1.1258	0.4303	-1.2341	-0.13691	-0.037208	0.74748	0.31344	-0.45788	-0.39926	0.62399	-0.69283	0.23434	-0.064061	0.29962	-0.49953	0.10851	1.2229	-1.0516	2.1685	-1.3323	0.4545	-0.039075	1.8162	2.0546	0.073399	1.1436	0.72539	-0.65177	0.64959	-0.81203	-1.2697	0.71725	1.5885	0.25181	2.1282	-1.2257	-1.7382	-0.067058	-0.40269
Paraglyphioceras celeris	Korn & Ebbighausen (2008, text-fig. 48D)	-1.9753	-0.28608		-0.79902	0.28491	-1.6815	0.12013	1.2097	-0.37342	-0.84347	-1.4681	-1.1397	-1.8466	1.2245	-1.4731	-1.4719	-0.026443	-0.15173	2.5368	-1.0341	1.3068	0.57525	0.34437	0.46248	0.88383	0.10571	2.054	-0.698	-0.555	0.9804	0.51323	1.4981	0.94932	-2.8483	-0.57187	0.23628	-0.84756	1.6648	-0.71869	-0.17663	1.1264	-0.18186	-0.889	-1.467	0.98417	1.012	0.98101	-1.5147
Paraglyphioceras rudis	Korn & Ebbighausen (2008, text-fig. 46G)	2.8875	2.1301		-0.41002	3.1414	-1.3759	-0.33824	3.404	-0.61496	0.379	-2.4343	-0.12387	2.8997	1.5389	2.314	0.31303	3.4037	0.2247	-0.51316	1.2587	3.1097	0.39648	0.56968	1.5918	-2.2206	2.3904	0.90089	1.3907	-0.053771	-1.2975	-0.085767	0.33186	0.013339	0.4082	0.58354	1.0898	0.43821	-1.3625	-0.50535	-0.08871	0.0088346	0.30258	-0.71422	-0.99047	0.3338	0.4613	-0.22469	-0.39468
Platygoniatites rhanemensis	Klug et al. (2006, 20% extended)	0.52051	0.65634		-0.16284	-2.2563	-1.0563	-1.6084	-1.1569	-0.1491	-1.1401	0.56794	-1.4519	-0.27823	-0.13621	0.49932	2.6141	-0.14703	-1.1464	0.15479	-0.21262	1.0067	1.4559	-0.90089	0.75968	-0.88879	1.4838	-1.1456	1.0664	1.6858	0.92602	0.1845	1.6139	-0.40653	0.50601	-1.0209	-1.9796	-1.0866	-0.79924	-0.99958	0.05874	-1.3556	-0.90885	0.36133	-1.565	-1.1275	1.4299	-0.61883	-0.49129
Platygoniatites rhanemensis	Klug et al. (2006, text-fig. 41E)	-0.53453	1.083		-0.48109	-1.2689	-1.292	-1.0473	-0.88351	0.19341	-0.75856	1.0185	-2.1143	1.043	0.94954	0.24148	1.4122	-1.236	0.95794	-1.1222	-0.25893	0.3075	1.3881	1.1967	-0.66283	-0.48983	1.1188	0.66192	-1.134	1.9895	-0.17866	-0.24037	0.40231	0.71782	0.52729	1.4233	0.3473	0.30835	0.45246	-1.0762	-1.1683	1.7071	-0.4776	1.2255	0.66694	0.1836	-1.1599	1.3467	0.76486
Platygoniatites rhanemensis	Klug et al. (2006, text-fig. 41F)	0.24292	-0.028156		-0.46495	-3.1909	-1.0612	-1.0794	0.98031	-0.3238	0.69888	0.19058	-0.31155	-0.1512	0.44065	0.66254	2.4255	1.4637	0.83759	1.4786	2.9739	-2.1122	0.55725	-0.92666	0.36831	0.72424	-1.346	-0.6343	-0.4184	-0.51296	-2.1121	-0.70027	1.0256	-0.56598	2.3753	-1.8047	1.8423	-1.9428	0.58197	1.1158	-0.54136	0.90273	-0.85018	-0.77719	-1.763	-0.77157	-1.6858	-0.18538	-0.047608
Revilloceras bellornatum	Klug et al. (2006, text-fig. 37B)	1.5452	1.4015		0.11361	-0.21394	1.1235	0.66247	0.93819	0.51905	-1.3053	0.70624	0.74074	-1.3853	1.7656	-1.9083	-1.0985	-1.4102	-0.92702	-0.15398	0.32743	-1.1287	0.80576	1.8125	-1.3446	-1.5859	0.13094	0.9105	0.91533	0.78291	-0.99949	0.94203	-0.15258	-0.62924	1.3837	-0.29282	1.1656	-1.4208	-1.3691	-0.65092	0.19846	-0.027658	0.13627	0.81232	-1.0678	0.81446	0.53552	0.40209	0.28785
Revilloceras bellornatum	unpubished	1.7165	1.5514		0.11151	0.050074	1.0989	0.80456	1.0927	0.59466	-1.459	0.53736	0.79311	-0.99949	2.4319	-2.0806	-1.3498	-1.2211	-0.97961	-0.65633	0.86877	-1.0637	0.89618	1.1651	-2.5617	-1.3667	-0.948	0.16078	0.65033	1.5645	-0.099249	0.69462	0.3057	0.67433	0.34747	-0.74563	0.086632	-0.89768	-0.31257	-0.079096	1.4191	-0.82266	-0.66704	0.65263	-0.88093	-0.21438	0.92595	1.685	0.48223
Revilloceras granofalcatum	Klug et al. (2006, text-fig. 35F)	0.57878	0.6955		1.046	0.03236	1.6304	0.64273	0.25944	0.16318	1.1814	1.0586	0.35197	-1.4665	1.143	0.1513	1.3665	-0.86145	-2.2706	2.1586	1.1802	0.23693	-1.9713	1.8427	1.9078	-1.9032	0.0098648	0.42281	-2.1788	0.32908	0.21252	0.76402	-0.39508	0.024788	0.51721	1.0454	-1.0323	1.7097	1.0251	-1.3885	-0.54557	0.76252	0.029544	-0.14438	-0.031667	-1.0549	-0.29631	-1.7117	0.60996
Revilloceras granofalcatum	unpubished	-1.2483	0.33309		-0.74814	-0.11362	0.021482	0.5748	-1.3699	0.18861	-0.36635	1.507	-1.2393	0.75101	2.1309	-0.15761	2.2188	0.18488	1.7693	0.42288	1.1001	-0.080585	0.5654	1.9263	0.91088	-0.43168	-1.7276	1.6259	-0.63047	1.232	0.50557	-3.2121	0.97271	-0.27681	0.80389	-0.2889	-0.91962	1.5826	-2.3664	-0.74981	0.43864	-1.2914	0.12855	0.75625	1.7994	0.033706	-0.034886	-1.5906	0.52142
Semibollandites qawiy	Bockwinkel et al. (2010, text-fig. 53C)	0.72223	-1.1472		1.031	-0.69621	-0.3996	0.37805	-1.0174	-0.21119	-0.84222	-1.8161	-0.24137	-0.60397	-0.19655	-0.41563	-0.75615	1.0022	-0.53081	-1.1742	-0.91858	-1.1465	0.19077	-0.097092	0.34463	-1.4424	0.89317	1.2784	-1.7512	-1.0632	-1.0639	-1.2717	-0.28916	-0.28804	-0.85638	0.42137	-1.7848	-0.99167	0.31657	-0.72379	-1.9625	-0.52366	0.50552	-0.10361	0.66432	-1.1294	0.76472	-0.62493	-1.6215
Semibollandites qawiy	Bockwinkel et al. (2010, text-fig. 53D)	1.9971	-0.88131		0.70413	0.39732	-3.4432	1.0461	-1.1213	-2.0643	-0.59918	1.6111	-0.067101	0.42853	0.57936	1.109	-0.56085	-0.31466	-0.52768	0.3337	-0.01023	-1.617	-2.4586	-1.165	-2.1805	0.12052	0.58373	0.7948	0.9207	-1.1629	0.28889	1.1923	1.4838	1.2937	0.9867	0.21706	-0.91416	0.53478	-0.32707	0.42122	1.1976	2.7117	-1.1336	-0.29153	0.57015	-1.1896	1.409	-1.602	0.30992
Semibollandites qawiy	Bockwinkel et al. (2010, text-fig. 53F)	1.8203	-1.2661		0.27503	0.35266	-2.729	3.7374	0.38242	-1.5851	0.73768	2.7356	-1.4114	2.4949	-0.88119	-0.088317	-0.63839	-0.67862	-1.7906	0.94437	-2.2593	-0.25776	0.66453	-0.93434	0.64018	-1.8133	-0.89808	0.25122	-2.4535	-0.39717	-0.47641	-2.0752	0.91301	-0.93067	0.32839	0.11731	1.5904	-1.5009	0.37282	1.308	-0.48456	-2.0569	1.5533	0.2506	-0.35738	0.41577	0.26715	1.8845	1.5012
Sudeticeras fornicum	Klug et al. (2006, text-fig. 15B)	-0.46353	-0.26184		0.36803	-0.20908	1.5207	0.81438	0.17895	0.50251	0.64632	0.29892	-0.020724	1.1424	-1.0568	-0.36298	-1.2697	1.1816	-0.049712	0.25857	1.113	-0.048282	-0.14504	-0.085516	0.37015	0.47221	-0.31395	-0.26427	0.16782	0.18912	0.11462	0.32818	1.8684	0.29521	-0.51164	0.047738	-1.4237	0.018109	-1.6381	0.26028	1.384	-0.40311	0.090284	0.39939	-1.6638	-0.43905	-2.0749	-0.35532	1.5428
Sudeticeras fornicum	Klug et al. (2006, text-fig. 15C)	-0.032751	0.18247		-2.0287	-0.15524	-1.0787	-1.1636	-1.0567	1.324	-0.0271	2.5578	-0.59729	0.21848	0.37016	-0.52247	-1.651	-0.080754	-0.44857	-0.17346	1.3893	1.4489	-0.46544	1.0056	0.38577	-0.52851	0.10733	1.088	-2.161	-2.2611	0.43398	0.15579	0.095791	2.216	0.61146	1.0083	-0.65686	0.35296	0.99545	0.05743	-0.20273	0.32625	0.23115	0.56674	-0.73012	1.098	0.72295	-1.849	-2.0172
Sudeticeras horoni	Korn & Ebbighausen (2008, text-fig. 62D)	0.92311	-1.0219		-0.12372	-1.2118	1.5572	0.82128	-0.41682	-1.3456	-0.7977	-0.54989	1.053	-0.50162	0.031583	-2.1893	-0.54717	2.0088	-0.55091	-1.5414	-0.44213	0.2987	1.1937	0.87388	0.69008	-0.042588	0.8978	0.086849	-0.76171	0.11199	0.024048	-0.22523	1.4898	1.598	-0.59089	-0.11262	-0.21248	0.36642	-1.3909	-0.047848	-1.5156	0.82937	-0.98526	-1.0844	1.1521	-0.40915	-0.40412	0.68875	-0.57859
Sudeticeras ibnbajjahi	Korn & Ebbighausen (2008, text-fig. 56G)	-1.2348	-0.42405		-1.1385	-0.43867	-1.0075	-0.097768	0.24505	-0.35641	-1.4434	0.43619	1.9762	-0.92386	2.0882	1.5101	0.15758	-0.5107	-1.717	-0.042231	-2.158	-0.27033	-0.15556	0.039841	-0.013488	-0.83797	0.037028	0.81859	2.5893	-1.2071	0.53213	-2.0314	-1.3674	-0.58094	-0.68514	-1.7872	-0.69937	0.81868	-0.17788	-0.68173	-0.76418	0.16545	1.0409	-0.14569	-0.77577	1.116	-1.6592	0.83966	2.0563
Sudeticeras murracaoense	Korn & Ebbighausen (2008, text-fig. 53F)	1.0187	0.86086		-0.47038	0.54448	-0.4478	-1.6932	-2.2089	-0.36056	1.4248	-0.65882	2.2555	-0.8359	0.069082	-0.44895	-0.14064	-0.28869	-0.47858	1.0216	0.27314	-0.42416	-0.46287	-1.1039	0.11777	-1.2992	0.62724	-1.501	-1.3903	0.84724	-0.37687	0.16716	0.19686	-0.55163	-1.5115	0.99655	1.7835	1.6945	0.72044	0.8442	2.3755	-1.0999	0.59734	1.0097	-1.5983	0.73882	-1.4009	-1.0474	0.63951
Sudeticeras occultornatum	Klug et al. (2006, text-fig. 19E)	-0.55813	-0.74838		-0.042687	-0.047813	0.10305	-1.1065	0.31684	0.6678	-0.78695	-0.57738	-1.469	1.6586	-0.47097	-1.4945	-1.1598	0.010394	-2.1452	-1.1501	0.90377	-0.25647	-0.030267	-1.296	0.20519	0.27368	0.5581	0.3893	-0.42231	-0.36655	0.29347	0.99551	0.032094	-1.604	1.5123	-0.85518	-0.43063	1.9534	-1.5075	-0.91125	-0.12994	0.19028	1.0456	1.4683	2.6429	0.52559	1.2995	0.17083	0.12304
Sudeticeras occultornatum	Klug et al. (2006, text-fig. 19F)	1.0715	0.65254		-2.5959	0.39152	-0.42322	2.3533	-0.86086	0.40136	1.0054	-1.8644	0.7919	2.7262	-1.3274	-1.8231	1.2654	0.5165	-1.9438	1.5845	0.014742	0.53524	1.5997	-0.4687	0.35961	1.3962	-2.3309	-0.22479	0.52089	0.45025	0.60656	-0.36025	-2.6276	-0.90475	-0.99774	1.1067	-0.015376	-0.80203	0.85486	-2.2584	-0.71465	1.3171	-1.7862	1.8796	0.25867	0.3416	-1.2078	-1.0562	0.68312
Sudeticeras pusillobatum	Klug et al. (2006, text-fig. 17C)	0.30137	0.68103		-1.5314	-1.1984	-0.63098	0.20839	-0.88469	1.2144	1.8176	0.043757	0.026587	-0.39343	-0.48532	-0.29619	-0.95385	0.16652	1.0112	-0.10333	0.93922	-0.025904	-0.25533	-1.9488	-0.23849	-0.76848	0.46258	0.83806	-0.78077	1.2225	-1.0889	1.0587	-1.3261	-1.172	1.7913	-0.81875	0.22224	0.5019	0.7254	-0.14694	-0.33533	-0.026592	0.57705	-1.9421	-0.12517	-0.7666	0.89385	2.3583	-0.45816
Sudeticeras pusillobatum	Klug et al. (2006, text-fig. 17D)	1.2069	1.3816		-1.4337	-0.30296	-0.78817	0.16724	-0.22034	1.0954	1.2977	-1.5338	0.86364	0.31356	-1.4059	-1.6358	0.98858	-0.034948	0.49589	-0.4045	-1.5763	-1.2976	-0.74559	-0.5638	-0.96498	0.42775	-0.41122	-0.99937	0.29837	-0.95794	2.1821	-1.0107	2.1835	1.0492	1.5065	-0.26774	-0.32385	-1.2208	0.090412	-1.3956	1.6462	0.075384	-0.61044	1.729	-0.10637	0.69663	1.2492	-0.77686	-0.50306
Sudeticeras pusillobatum	unpubished	-0.28721	0.23985		-1.6561	-1.4765	-0.76631	0.4482	-0.84274	1.2297	1.8166	1.0148	-0.31104	-0.27617	1.0439	0.92055	-1.8866	0.63129	0.14814	-0.090973	1.2715	1.0713	-0.24092	-0.67346	-0.8665	1.8153	0.12446	1.2571	0.039877	-0.78974	0.07347	1.1474	-0.7964	0.23929	1.3596	0.66903	0.60236	0.52813	0.42777	-0.75572	-0.38269	-2.7911	-0.62241	-0.66099	-0.42764	0.88715	-0.069715	2.0961	-1.1134
Sudeticeras splendens	Korn & Ebbighausen (2008, text-fig. 58B)	0.54044	-0.31525		-1.8664	-0.31406	-0.43383	-0.92163	-0.43817	0.66853	-0.62806	1.1047	-0.47484	-0.55358	-1.1883	0.35643	-0.8511	0.10057	0.12862	-1.1307	0.50993	0.77159	0.16797	-0.27866	0.96912	-0.29233	-0.61732	2.2553	-0.22229	1.1858	-0.46241	-0.83633	-0.45103	0.84222	-0.86691	-0.14029	-0.19127	0.66467	1.067	0.07044	-0.10559	0.47351	-1.1165	-0.34775	-0.097356	0.14575	0.64885	-0.50354	1.1859
Timimounia lunula	Bockwinkel et al. (2010, text-fig. 58E)	0.17965	-1.4276		-0.69072	-0.21527	0.12632	-1.6243	-0.40164	0.095564	0.15258	-1.2056	-0.77029	-0.64869	0.83578	0.60766	-0.13119	0.36858	-1.8139	-0.243	-0.10058	0.23254	0.52022	-0.49903	-0.34559	-0.88958	-1.0057	-0.56318	0.65134	0.17783	0.026558	-0.11278	-1.0088	1.0602	-0.12647	-1.1815	1.5049	1.3748	0.87399	-0.14528	0.37638	0.80926	-0.16799	0.29786	0.71076	-0.24952	-0.77755	-0.60228	2.1502
Trimorphoceras absolutum	Ebbighausen et al. (2010, text-fig. 31C)	0.32106	-0.42684		-2.6984	1.8071	0.51833	0.6618	-0.8036	2.0279	1.7412	-0.0066153	-0.44147	-0.51315	0.52892	-0.14785	1.6254	0.086591	0.17997	1.4301	-0.9101	-2.4852	-0.78978	0.71487	1.108	-0.22657	2.5351	0.63688	1.2502	0.72197	2.2352	1.1845	-0.83278	-0.031424	-0.5564	0.57518	-0.66241	-1.3156	-0.95876	0.11022	-2.9498	0.5449	0.61431	-0.71964	-0.0071258	-0.41915	-0.22661	0.62151	-0.081245
Trimorphoceras azzelmattiense	Korn et al. (2010, text-fig. 10B)	0.4824	-0.50587		0.25886	1.1116	-0.00093601	-2.1	-1.4445	-0.18245	-1.1558	0.59729	-0.92708	-0.15611	0.19676	0.20526	-1.6209	1.4788	1.5247	0.68762	0.47505	0.36351	-0.46771	-0.75844	0.79518	-0.50941	0.211	-0.55483	0.29015	0.76188	2.4882	-0.30827	-0.78173	-0.8062	0.60398	-0.061506	-0.99607	-0.94411	-0.45219	-0.41077	1.9384	0.64182	0.0082769	1.0524	0.030553	-0.66898	-1.1275	1.6535	-0.72982
Trimorphoceras crassilens	Ebbighausen et al. (2010, text-fig. 30I)	0.1109	-0.97317		-1.1189	1.5682	0.8078	-1.5953	0.96038	-0.4296	1.5533	0.78971	0.0079204	0.14189	-0.023969	0.91748	-0.091146	-1.1873	0.29573	-0.46876	0.32492	-0.48786	0.72735	1.2925	-0.035173	0.09206	0.77288	0.69578	-0.052731	-1.1544	0.307	0.46987	0.31377	0.050523	-0.27709	0.32528	0.3789	-0.26108	2.242	1.3875	0.23917	0.79692	0.07775	2.0254	0.0096467	-2.2621	2.07	-0.15748	0.51987
Trimorphoceras crassilens	Ebbighausen et al. (2010, text-fig. 30J)	0.010552	-1.7566		-0.1037	1.0999	0.08323	-1.077	0.86271	0.68673	1.1858	0.93464	-0.31056	-0.10824	1.0176	-0.20786	0.078699	0.92529	0.13914	0.76527	-0.8313	-1.1559	0.91539	-0.51096	-1.4968	-0.53759	-0.86775	-0.12798	0.51957	-0.26118	-1.5731	0.6876	1.1923	0.3382	0.12971	0.96322	-1.99	1.4562	-0.45543	0.30658	-0.57291	-0.99512	-0.59557	0.96151	-0.43601	0.9446	-0.84386	0.13698	0.050826
Trimorphoceras crassilens	Ebbighausen et al. (2010, text-fig. 30K)	-0.51926	-1.118		-0.98365	1.607	1.4451	-0.31257	1.216	0.0079926	1.1259	1.5122	0.025039	0.73531	0.27775	0.31919	0.25045	-0.82512	0.68622	-0.71936	-0.87452	-0.57706	0.22412	0.57266	0.53945	0.7708	0.82519	-1.285	-0.17329	-0.09451	0.17588	-0.44716	0.82835	-1.1659	0.45161	-0.58626	0.32343	-1.6004	1.0885	0.5933	0.95277	-1.3386	-0.040446	-0.57707	1.0101	0.066123	0.99913	-0.33482	-0.90627
[truncated: 64 more columns]

## Sheet: values VLS
Var-covar	Eigenvalue	% variance
1	0.0203046	42.34
2	0.0171168	35.693
3	0.00496141	10.346
4	0.00189285	3.9471
5	0.00129575	2.702
6	0.000884153	1.8437
7	0.000430164	0.89701
8	0.000243313	0.50737
9	0.000162943	0.33978
10	0.000129043	0.26909
11	9.75797e-05	0.20348
12	8.22767e-05	0.17157
13	6.10254e-05	0.12725
14	5.88328e-05	0.12268
15	4.06547e-05	0.084776
16	3.62776e-05	0.075648
17	2.83837e-05	0.059188
18	1.96675e-05	0.041012
19	1.69101e-05	0.035262
20	1.36312e-05	0.028425
21	1.20366e-05	0.0251
22	9.92602e-06	0.020698
23	8.2986e-06	0.017305
24	6.39282e-06	0.013331
25	5.44157e-06	0.011347
26	4.89908e-06	0.010216
27	4.38555e-06	0.009145
28	3.8289e-06	0.0079843
29	3.14247e-06	0.0065529
30	2.61146e-06	0.0054456
31	2.57961e-06	0.0053792
32	1.82168e-06	0.0037987
33	1.67351e-06	0.0034897
34	1.57907e-06	0.0032928
35	1.29912e-06	0.002709
36	1.10982e-06	0.0023143
37	8.99918e-07	0.0018766
38	8.18117e-07	0.001706
39	7.20386e-07	0.0015022
40	6.53309e-07	0.0013623
41	6.04895e-07	0.0012614
42	5.15703e-07	0.0010754
43	4.26165e-07	0.00088867
44	3.75589e-07	0.0007832
45	3.29914e-07	0.00068796
46	3.23417e-07	0.00067441
47	2.67214e-07	0.00055721
48	2.34029e-07	0.00048801
49	2.01614e-07	0.00042042
50	1.66036e-07	0.00034623
51	1.63361e-07	0.00034065
52	1.49571e-07	0.0003119
53	1.21182e-07	0.0002527
54	1.13288e-07	0.00023624
55	1.08568e-07	0.00022639
56	9.72291e-08	0.00020275
57	8.51426e-08	0.00017755
58	7.20719e-08	0.00015029
59	6.7958e-08	0.00014171
60	5.85648e-08	0.00012212
61	5.40744e-08	0.00011276
62	5.13407e-08	0.00010706
63	4.69002e-08	9.7799e-05
64	4.12976e-08	8.6117e-05
65	3.59923e-08	7.5054e-05
66	3.41871e-08	7.1289e-05
67	3.12726e-08	6.5212e-05
68	2.94679e-08	6.1448e-05
69	2.58835e-08	5.3974e-05
70	2.39194e-08	4.9878e-05
71	2.1556e-08	4.495e-05
72	2.04188e-08	4.2579e-05
73	1.93841e-08	4.0421e-05
74	1.71051e-08	3.5669e-05
75	1.53751e-08	3.2061e-05
76	1.31895e-08	2.7504e-05
77	1.26419e-08	2.6362e-05
78	1.2181e-08	2.5401e-05
79	1.08493e-08	2.2624e-05
80	9.42519e-09	1.9654e-05
81	8.54421e-09	1.7817e-05
82	7.78334e-09	1.623e-05
83	7.17195e-09	1.4955e-05
84	6.84931e-09	1.4283e-05
85	5.98001e-09	1.247e-05
86	5.52936e-09	1.153e-05
87	5.34363e-09	1.1143e-05
88	4.28049e-09	8.926e-06
89	3.93976e-09	8.2154e-06
90	3.79084e-09	7.9049e-06
91	2.68026e-09	5.5891e-06
92	2.39902e-09	5.0026e-06
93	2.11477e-09	4.4099e-06
94	1.73707e-09	3.6223e-06
95	1.54526e-09	3.2223e-06
96	1.43941e-09	3.0016e-06
97	1.22127e-09	2.5467e-06
98	8.29879e-10	1.7305e-06
99	7.00076e-10	1.4598e-06
100	5.12821e-10	1.0694e-06
101	3.51071e-10	7.3208e-07
102	2.55445e-10	5.3267e-07
103	2.21739e-10	4.6239e-07
104	1.27259e-10	2.6537e-07
105	1.11314e-10	2.3212e-07
106	1.03327e-10	2.1546e-07
107	7.99773e-11	1.6677e-07
108	5.12111e-11	1.0679e-07
109	2.83762e-11	5.9172e-08
110	1.42992e-11	2.9818e-08
111	2.08087e-35	4.3392e-32
112	0	0
113	0	0
114	0	0
115	0	0
116	0	0
117	0	0
118	0	0
119	0	0
120	0	0
