# Supplementary material for: Quantitative analysis of suture lines in Carboniferous ammonoids
Source: Copernicus journal article supplement (doi:10.5194/fr-21-223-2018), 2018-09-11
Supplement: Supplementary file 2 [file fr-21-223-2018-supplement.zip › Fouier analysis 2.xls]

## Sheet: taxonomy
Goniatitoidea	Goniatitidae	Progoniatitinae	Progoniatites maghribensis
Goniatitoidea	Goniatitidae	Goniatitinae	Goniatites americanus
Goniatitoidea	Goniatitidae	Goniatitinae	Goniatites crenistria
Goniatitoidea	Goniatitidae	Goniatitinae	Goniatites deceptus
Goniatitoidea	Goniatitidae	Goniatitinae	Goniatites deceptus
Goniatitoidea	Goniatitidae	Goniatitinae	Goniatites eganensis
Goniatitoidea	Goniatitidae	Goniatitinae	Goniatites eganensis
Goniatitoidea	Goniatitidae	Goniatitinae	Goniatites evelinae
Goniatitoidea	Goniatitidae	Goniatitinae	Goniatites gerberi
Goniatitoidea	Goniatitidae	Goniatitinae	Goniatites globostriatus
Goniatitoidea	Goniatitidae	Goniatitinae	Goniatites hudsoni
Goniatitoidea	Goniatitidae	Goniatitinae	Goniatites lazarus
Goniatitoidea	Goniatitidae	Goniatitinae	Goniatites moorei
Goniatitoidea	Goniatitidae	Goniatitinae	Goniatites rodioni
Goniatitoidea	Goniatitidae	Goniatitinae	Goniatites sphaericus
Goniatitoidea	Goniatitidae	Goniatitinae	Goniatites spirifer
Goniatitoidea	Goniatitidae	Goniatitinae	Goniatites stenumbilicatus
Goniatitoidea	Goniatitidae	Goniatitinae	Hypergoniatites exiguus
Goniatitoidea	Goniatitidae	Goniatitinae	Hypergoniatites fusiger
Goniatitoidea	Goniatitidae	Goniatitinae	Hypergoniatites tenuiliratus
Goniatitoidea	Goniatitidae	Arnsbergitinae	Arnsbergites arnsbergensis
Goniatitoidea	Goniatitidae	Arnsbergitinae	Arnsbergites ferrus
Goniatitoidea	Goniatitidae	Arnsbergitinae	Arnsbergites gracilis
Goniatitoidea	Goniatitidae	Arnsbergitinae	Arnsbergites proiecturus
Goniatitoidea	Goniatitidae	Arnsbergitinae	Arnsbergites robustus
Goniatitoidea	Goniatitidae	Arnsbergitinae	Arnsbergites rufus
Goniatitoidea	Goniatitidae	Arnsbergitinae	Arnsbergites sphaericostriatus
Goniatitoidea	Goniatitidae	Arnsbergitinae	Arnsbergites warslowensis
Goniatitoidea	Goniatitidae	Arnsbergitinae	Hibernicoceras artilobatum
Goniatitoidea	Goniatitidae	Arnsbergitinae	Hibernicoceras carraunense
Goniatitoidea	Goniatitidae	Arnsbergitinae	Hibernicoceras touissitense
Goniatitoidea	Goniatitidae	Arnsbergitinae	Paraglyphioceras celeris
Goniatitoidea	Goniatitidae	Arnsbergitinae	Paraglyphioceras rudis
Goniatitoidea	Goniatitidae	Arnsbergitinae	Neogoniatites canovasi
Goniatitoidea	Goniatitidae	Arnsbergitinae	Neogoniatites latus
Goniatitoidea	Goniatitidae	Arnsbergitinae	Neogoniatites milleri
Goniatitoidea	Goniatitidae	Arnsbergitinae	Neogoniatites ruginosus
Goniatitoidea	Goniatitidae	Arnsbergitinae	Neogoniatites worki
Goniatitoidea	Delepinoceratidae	Dombaritinae	Lusitanoceras zirari
Goniatitoidea	Delepinoceratidae	Dombaritinae	Revilloceras bellornatum
Goniatitoidea	Delepinoceratidae	Dombaritinae	Revilloceras granofalcatum
Goniatitoidea	Delepinoceratidae	Dombaritinae	Dombarites carinatus
Goniatitoidea	Delepinoceratidae	Dombaritinae	Dombarites falcatoides
Goniatitoidea	Delepinoceratidae	Dombaritinae	Dombarites linteroides
Goniatitoidea	Delepinoceratidae	Dombaritinae	Dombarites liratostriatus
Goniatitoidea	Delepinoceratidae	Dombaritinae	Dombarites liratus
Goniatitoidea	Delepinoceratidae	Dombaritinae	Dombarites parafalcatoides
Goniatitoidea	Delepinoceratidae	Dombaritinae	Dombarites paratectus
Goniatitoidea	Delepinoceratidae	Dombaritinae	Dombarites semiliratus
Goniatitoidea	Delepinoceratidae	Dombaritinae	Dombarites tectus
Goniatitoidea	Delepinoceratidae	Delepinoceratinae	Platygoniatites molaris
Goniatitoidea	Delepinoceratidae	Delepinoceratinae	Platygoniatites nudus
Goniatitoidea	Delepinoceratidae	Delepinoceratinae	Platygoniatites omniliratus
Goniatitoidea	Delepinoceratidae	Delepinoceratinae	Platygoniatites rhanemensis
Goniatitoidea	Delepinoceratidae	Delepinoceratinae	Platygoniatites superior

## Sheet: Fourier coeff E lobe
species	source	coeff1	coeff2	coeff3	coeff4	coeff5	coeff6	coeff7	coeff8	coeff9	coeff10	coeff11	coeff12	coeff13	coeff14	coeff15	coeff16	coeff17	coeff18	coeff19	coeff20	coeff21	coeff22	coeff23	coeff24	coeff25	coeff26	coeff27	coeff28	coeff29	coeff30	coeff31	coeff32	coeff33	coeff34	coeff35	coeff36	coeff37	coeff38	coeff39	coeff40	coeff41	coeff42	coeff43	coeff44	coeff45	coeff46	coeff47	coeff48
Arnsbergites arnsbergensis	Korn (1988, text-fig. 48B)	0.555043	-0.758306	0.808371	0.588635	-0.0613663	-0.187975	0.247846	-0.0791959	0.340191	0.111995	0.0538882	-0.163386	-0.0971792	0.0703342	-0.00589183	-0.00897482	0.000285758	-0.0599153	0.0575775	0.000837916	0.00191929	0.00131992	0.0480871	-0.0646829	0.0429671	-0.0134657	0.00278161	0.00866678	-0.00724576	0.022133	-0.000826238	7.83508e-05	-0.00828993	-0.011573	0.0216047	-0.0157272	0.00210118	-0.000152484	0.000582491	-0.0171872	0.00660192	-0.00837951	0.00105223	0.000676668	-0.000407768	-0.000821989	0.00541776	-0.00145732
Arnsbergites ferrus	Korn & Ebbighausen (2008, text-fig. 31G)	0.586648	-0.743801	0.784701	0.61987	-0.0839693	-0.360632	0.305656	-0.0738847	0.368989	0.173801	0.071775	-0.153739	-0.0865948	0.0423162	-0.0108126	-0.0216988	0.00882823	-0.0416727	0.0322723	0.00641385	-0.0225951	-0.0271233	0.0575372	-0.0483083	0.0529717	-0.00117561	-0.000922508	-0.0169212	-0.00307957	0.00376195	-0.00749763	-0.00625536	-0.000387268	-0.00137021	0.0263153	-0.00677346	-0.0109638	-0.0046133	0.00505086	-0.0121662	0.00408865	-0.00241948	-0.00389764	-0.0070323	0.00404192	-0.0205013	-0.00390741	-0.000704754
Arnsbergites gracilis	Korn (1988, text-fig. 45C)	0.600584	-0.799558	0.772035	0.580673	-0.0553685	-0.189774	0.276716	-0.0797938	0.322578	0.121741	0.0508917	-0.133897	-0.0999325	0.0635144	-0.00751474	-0.0118771	0.00654031	-0.0843646	0.0517984	0.00435954	0.013374	0.0116556	0.0413597	-0.046683	0.0343346	-0.00707442	-0.000582144	-0.00409128	-0.00562879	0.0118691	-0.0043117	-0.0017046	-0.00630985	-0.0120097	0.0244436	-0.0129718	0.00110013	0.000175223	0.00145128	-0.00708674	0.0113047	-0.0110148	-0.00961398	-0.00965007	0.000577523	0.00435305	0.00851644	-0.00111816
Arnsbergites proiecturus	Korn & Ebbighausen (2008, text-fig. 35C)	0.737734	-0.675088	0.488963	0.532002	0.0216796	-0.251646	0.26171	0.0225084	0.198527	0.258428	0.138459	-0.106784	-0.109775	-0.0190432	0.00916222	-0.0503981	0.0699434	-0.0447038	0.00239067	0.00375371	0.00110342	-0.00397088	0.0649381	0.0172079	0.0162862	0.031284	0.0160097	-0.00811611	-0.0178174	-0.00640343	0.00869556	-0.0250023	0.0174565	-0.00722402	0.00328226	0.00775073	0.00219531	-0.00469453	0.0109141	0.00489142	0.00270005	0.00874184	0.0125659	-0.00416035	-0.00178679	-0.001057	0.00510784	-0.00847445
Arnsbergites robustus	Korn & Ebbighausen (2008, text-fig. 26B)	0.647672	-0.761531	0.741146	0.622295	-0.057972	-0.344756	0.332832	-0.0579121	0.351472	0.209632	0.0842239	-0.144363	-0.104694	0.0363824	-0.00323376	-0.00894875	0.0235913	-0.0599168	0.00337159	0.000543218	-0.00846489	-0.0160283	0.0772222	-0.0428087	0.0506856	0.0109091	0.00206666	-0.0127912	-0.00767184	0.00619226	-0.00658	-0.00793115	0.000476852	-0.0062342	0.0141476	0.000134382	-0.00755554	-0.007148	0.0110679	-0.0128596	0.0153275	-0.00174527	-0.00245665	-0.0149048	0.00428622	-0.0063338	-0.00137798	-0.000726646
Arnsbergites rufus	Korn & Ebbighausen (2008, text-fig. 38B)	0.528237	-0.849093	0.719312	0.449084	-0.178297	-0.368547	0.272905	-0.134196	0.369504	0.0401424	0.0158287	-0.155716	-0.0583294	0.0729341	-0.0321968	-0.0249056	-0.0201253	-0.05586	-0.00426709	0.00148952	-0.0457417	-0.00961092	0.0134961	-0.0641143	0.0313469	-0.0321764	-0.00899746	-0.00796729	0.00156228	0.00683741	-0.0203705	0.00496686	-0.00940533	-0.00294996	0.000340798	0.000116025	-0.012347	0.0103753	-0.0024569	-0.00266444	-0.000265904	-0.00232728	-0.0113796	0.00199927	-0.0144263	-0.00665513	-0.00505596	0.0115414
Arnsbergites sphaericostriatus	Korn & Ebbighausen (2008, text-fig. 28D)	0.649989	-0.759943	0.569198	0.486255	-0.0503927	-0.320616	0.279551	-0.0440341	0.295859	0.182211	0.0813838	-0.132323	-0.0942242	0.0303266	-0.0183298	-0.0566589	0.0268535	-0.064233	-0.00311587	-0.00123311	-0.0117054	-0.0231915	0.0499053	-0.0252254	0.0443779	0.0109028	0.00471154	-0.0199492	-0.0127365	0.00923417	-0.0193685	-0.0268763	0.00123963	-0.0140904	0.00430911	0.00039028	-0.00687327	-0.0069511	0.0054945	-0.00554079	0.00607492	-0.000371128	-0.00113425	-0.0143158	0.00457343	-0.0060495	-0.0105108	-0.00785693
Arnsbergites warslowensis	Korn & Ebbighausen (2008, text-fig. 26C)	0.64173	-0.766841	0.710874	0.60049	-0.0489455	-0.270692	0.328012	-0.0552441	0.313989	0.178502	0.0654173	-0.111828	-0.100747	0.0379816	0.000820463	0.00193093	0.0273872	-0.0775679	0.00111305	0.0017124	0.00041963	0.000443738	0.0698904	-0.0403874	0.0453376	0.00739154	0.000911632	-0.000354221	-0.0110709	0.00978088	-0.0123961	-0.0142175	-0.00032123	-0.0163841	0.0199667	2.72705e-05	-0.00134472	-0.00126116	0.0103781	-0.0112666	0.0147967	-0.00287767	-0.00175787	-0.0098783	0.000471547	-0.000851242	-0.00136643	-0.000986782
Revilloceras bellornatum	Klug et al. (2006, text-fig. 37B)	0.686981	-0.726673	0.664394	0.6271	-0.0186742	-0.336935	0.381178	-0.0220352	0.281172	0.23781	0.0834364	-0.0992964	-0.0909769	0.0101869	-0.00150438	-0.0148949	0.0350064	-0.0464406	0.0130596	0.00952646	-0.0059921	-0.0350815	0.0807557	-0.0138312	0.0483796	0.0324837	0.00106645	-0.00194432	-0.0183215	0.00415265	-0.0019485	-0.00976656	0.0118597	-0.020158	0.0129218	0.00745838	-0.000551445	-0.00160383	0.0081708	-0.00233175	0.00525119	0.00270256	0.00534076	-0.0101512	0.0149435	-0.00524833	-0.00316774	-0.00920423
Dombarites carinatus	Ruzhencev & Bogoslovskaya (1971, text-fig. 46a)	0.469264	-0.592261	0.78378	0.621039	-0.0987325	-0.416153	0.406028	-0.0951211	0.381442	0.177893	0.0622913	-0.132577	-0.0754235	0.0381875	0.0144761	0.029068	0.00509181	-0.0249113	0.0494596	0.0106093	-0.0241887	-0.0290435	0.0448201	-0.0373673	0.0444187	-0.00114665	0.000311675	0.00363325	0.0116804	-0.015483	-0.00594896	-0.00417132	0.00372251	0.0137007	0.028531	-0.00762891	-0.0068397	-0.00284902	0.00445039	-0.00997431	0.00056119	-0.000190952	9.20013e-05	-0.000119952	0.00461358	-0.0262106	-0.000920776	-0.000229531
Revilloceras granofalcatum	Klug et al. (2006, text-fig. 35F)	0.575464	-0.756258	0.799876	0.599778	-0.132374	-0.439229	0.438991	-0.125244	0.42918	0.158584	0.057499	-0.150543	-0.0993163	0.0668657	-0.000921539	-0.0012283	0.00399278	-0.0625704	0.0381503	0.00326325	-0.0243377	-0.0216466	0.0526666	-0.0596257	0.0384736	-0.00775687	-0.000484818	-0.0085181	0.00739456	-0.0155125	-0.00444899	-0.000603542	0.00537347	0.0086574	0.0218333	-0.0126496	-0.0256811	-0.00346782	0.00124746	-0.00402354	0.0125762	-0.0119896	-0.0108687	-0.0113487	-0.00207996	-0.0148442	-0.00096145	-0.000286937
Dombarites falcatoides	Ruzhencev & Bogoslovskaya (1971, text-fig. 44d)	0.688756	-0.724941	0.68745	0.65686	-0.0175868	-0.392667	0.291486	-0.0144894	0.293889	0.255808	0.110561	-0.127275	-0.101338	0.00875976	-0.00443448	-0.044931	0.0370016	-0.0466641	0.0216367	0.0171453	-0.00555562	-0.0383975	0.0651543	-0.00961924	0.0332579	0.0238129	0.0135477	-0.0192973	-0.00102737	0.000113029	-0.0015405	-0.0107904	0.00200358	-0.00343152	0.0166975	0.0113139	-0.00514853	-0.0211399	0.00530352	-0.00165122	0.00563448	0.00323187	0.00533745	-0.0087668	0.0162075	-0.00465795	-0.00120564	-0.00408848
Dombarites linteroides	Ruzhencev & Bogoslovskaya (1971, text-fig. 51b)	0.486386	-0.660977	0.801338	0.598132	-0.118674	-0.407437	0.394843	-0.119741	0.391519	0.144649	0.050106	-0.139077	-0.068274	0.0426654	0.00307166	0.00421371	0.00133714	-0.0197394	0.0564882	0.00313348	-0.038145	-0.0324193	0.0418169	-0.0499435	0.0485824	-0.011256	-0.00129487	-0.00264559	0.00405792	-0.0107261	0.00274957	0.00038217	0.00134909	0.00232655	0.0186439	-0.0103768	-0.00340684	-0.000184832	0.00115265	-0.0103025	-0.00300449	0.00193087	-0.00308434	-0.00223701	-0.00459132	-0.031271	-0.00544525	0.000613839
Dombarites liratostriatus	Ruzhencev & Bogoslovskaya (1971, text-fig. 50v)	0.477992	-0.608391	0.784088	0.620634	-0.0906412	-0.373479	0.385536	-0.0915323	0.372621	0.169795	0.0577854	-0.125221	-0.0744294	0.0384837	0.00517075	0.0104755	0.00303413	-0.0156254	0.0520728	0.0107227	-0.0261812	-0.0301766	0.0533954	-0.0456347	0.0476039	-0.00238972	0.000228984	-0.000857324	0.00444434	-0.00616986	0.0075591	0.00564583	0.001227	0.00420084	0.0263631	-0.00731087	-0.00311387	-0.00130873	0.00191671	-0.00412794	0.000359609	-0.000204256	-0.000437712	-0.00116041	0.00395059	-0.028222	-0.00299191	-0.000116363
Dombarites liratus	Ruzhencev & Bogoslovskaya (1971, text-fig. 50b)	0.505724	-0.665394	0.797361	0.603496	-0.0726042	-0.250944	0.392807	-0.109591	0.345793	0.133771	0.0369636	-0.0950798	-0.0994158	0.0624952	0.0264272	0.0428101	0.00583916	-0.0665255	0.0474048	0.0049826	0.00031622	0.000256375	0.0358303	-0.0386333	0.0477298	-0.0086647	0.00248234	0.0126442	-0.00345422	0.00725759	0.00592185	0.00353153	-0.000529811	-0.000866501	0.0210328	-0.010495	-0.00197397	-0.000233772	0.000242994	0.000298053	0.0147012	-0.0131212	-0.00493867	-0.00537273	-5.11687e-06	0.00127673	0.0107064	-0.000755495
Dombarites parafalcatoides	Ruzhencev & Bogoslovskaya (1971, text-fig. 49v)	0.556614	-0.800942	0.823042	0.567776	-0.0801083	-0.211329	0.372505	-0.139984	0.350948	0.088184	0.03234	-0.130096	-0.0873471	0.0770686	0.0229183	0.0260226	-0.00817713	-0.0708077	0.049126	-0.0058151	-0.0038755	-0.00194348	0.0293358	-0.0551466	0.0508853	-0.0258787	0.00198418	0.00378729	-0.00307464	0.0241069	0.00914851	0.00120378	-0.0168901	-0.0151166	0.0133868	-0.0153417	0.00967966	-0.00222937	-0.00188281	-0.00913337	0.00477197	-0.0113026	-0.00331201	-0.00131925	-0.00236826	-0.00316175	0.00442462	-0.0029936
Dombarites paratectus	Ruzhencev & Bogoslovskaya (1971, text-fig. 48g)	0.399734	-0.569989	0.817814	0.575481	-0.154253	-0.426859	0.386492	-0.139169	0.406143	0.110282	0.0297843	-0.108601	-0.0592104	0.049229	0.0114419	0.0135743	-0.00202805	-0.0234533	0.042797	-0.00313306	-0.0244675	-0.0142892	0.0343482	-0.0581778	0.0244127	-0.0112723	0.00335621	0.00700447	0.00617179	-0.0331414	-0.00206649	-0.000215468	0.0137682	0.014102	0.0189183	-0.0182467	-0.00903825	0.00145819	-0.00092534	-0.00512167	0.0017355	-0.00340101	-0.00324246	-0.00152157	-0.0102767	-0.018232	-0.00056199	2.81069e-05
Dombarites semiliratus	Ruzhencev & Bogoslovskaya (1971, text-fig. 51v)	0.504485	-0.603834	0.769846	0.638211	-0.0795506	-0.413405	0.371586	-0.0684758	0.367136	0.202503	0.0762996	-0.137279	-0.0796075	0.032175	0.00507963	0.012767	0.00697087	-0.0214354	0.043987	0.0150992	-0.0222179	-0.0355328	0.062225	-0.0388372	0.0420419	0.00567397	0.000225629	0.00221747	0.012187	-0.0108739	0.000636781	0.00153786	0.000494044	0.00894378	0.0227422	-0.00123114	-0.00680739	-0.0052633	0.00670093	-0.00908571	0.000860246	0.000251345	-0.000372624	-0.00294416	0.011497	-0.0241877	-0.000694712	-2.81641e-05
Dombarites tectus	Ruzhencev & Bogoslovskaya (1971, text-fig. 48b)	0.489646	-0.62718	0.786436	0.61766	-0.101364	-0.397135	0.412671	-0.100579	0.38384	0.167698	0.0484187	-0.107506	-0.0928129	0.0508689	0.0141686	0.0267181	0.0094309	-0.0569959	0.0421247	0.00821284	-0.0111881	-0.0122647	0.0435849	-0.0388778	0.0337918	-0.00267353	0.00101743	0.003191	0.0135902	-0.0210015	-0.00253343	-0.000930045	0.00657187	0.0184926	0.028191	-0.00924799	-0.0206178	-0.00703405	-0.000329853	0.00358499	0.018116	-0.0117921	-0.00639944	-0.00969746	0.000831318	-0.0103581	0.000976605	3.3839e-06
Goniatites americanus	Korn & Titus (2011, text-fig. 43J)	0.537176	-0.843423	0.790479	0.499712	-0.0883788	-0.181097	0.286377	-0.133205	0.347797	0.0405867	0.0239802	-0.198841	-0.0787613	0.0994829	0.0320826	0.0256609	-0.0284856	-0.0829503	0.0340319	-0.0105447	0.00996337	0.00229197	0.0155577	-0.0628117	0.0320519	-0.0308036	-0.00106355	-0.00181512	0.00438545	0.0188799	-0.00664277	0.00176828	-0.0167911	-0.00603295	0.00899908	-0.0247091	0.00249556	-0.00195044	-0.00639991	-0.00992535	-0.00118638	-0.0155835	-0.01106	0.000939996	0.00423974	0.00226757	0.00349185	-0.00632531
Goniatites crenistria	Korn & Ebbighausen (2008, text-fig. 18C)	0.592297	-0.805717	0.693439	0.508465	-0.0635982	-0.197386	0.363391	-0.114032	0.331248	0.111284	0.0594295	-0.174629	-0.108278	0.0771125	0.00729655	0.0106258	0.00128299	-0.087038	0.0552533	0.0011728	0.00136179	0.000787202	0.0403924	-0.0524649	0.0414796	-0.0119936	-0.000264945	-0.00109284	-0.00707176	0.0199524	-0.00528818	-0.00195939	-0.013541	-0.0199712	0.0210813	-0.0142145	0.00239791	0.000270362	0.000781345	-0.0147965	0.00749834	-0.00952498	-0.00461531	-0.004038	-0.000374999	-0.00147856	0.00565359	-0.00136149
Goniatites evelinae	Klug et al. (2006, text-fig. 26D)	0.669613	-0.742691	0.509492	0.454012	-0.0230704	-0.178655	0.228165	-0.0233768	0.20335	0.140828	0.0960364	-0.136231	-0.09708	0.0252839	-0.00320395	-0.0178553	0.0471169	-0.0881455	0.0165567	0.0099828	0.00356839	0.00780566	0.0391973	-0.0137725	0.0155685	0.00627823	0.00600966	-0.0134809	-0.0130861	0.00711715	-0.00738765	-0.0154025	0.00753498	-0.0280394	0.0075107	0.00204096	0.00187053	0.00172792	0.00498189	-0.00237984	0.00154134	0.000365157	0.00156833	-0.0108398	-0.00205886	0.0016315	-0.0039329	-0.00526562
Goniatites sphaericus	Korn (1988, text-fig. 38E)	0.620592	-0.783821	0.694816	0.562772	-0.0459086	-0.207785	0.327366	-0.0715299	0.317946	0.153632	0.0763831	-0.154894	-0.116971	0.0550438	0.000608973	0.00201967	0.0203444	-0.0874886	0.0475284	0.0121205	0.00656261	0.00872521	0.0516032	-0.0401659	0.0381564	-0.000400094	0.00093076	-0.00316345	-0.0094357	0.0116011	-0.00528893	-0.00395117	-0.00396595	-0.0165077	0.0226457	-0.00424104	-0.000389399	-0.00038449	0.00669207	-0.0125326	0.0151544	-0.00743578	-0.00328688	-0.00750422	-0.00105732	0.00380482	0.00290956	0.000810472
Goniatites gerberi	Klug et al. (2006, text-fig. 24F)	0.63604	-0.771651	0.553602	0.458837	-0.0258019	-0.1365	0.2586	-0.0494321	0.225015	0.123134	0.0794242	-0.144517	-0.0917564	0.0364548	-0.00599873	-0.0144929	0.0282702	-0.0879785	0.0347004	0.0112453	0.00844055	0.0133287	0.0372078	-0.0238952	0.0228941	0.00281388	0.00242821	-0.0188973	-0.0130856	0.0122516	-0.00908909	-0.0098849	-0.00222273	-0.0309451	0.0215483	-0.00139143	0.00839283	0.00606616	0.00334328	-0.00400527	-9.59501e-05	-0.000137545	-0.00360014	-0.013015	0.0010238	-0.00213422	-0.00278868	-0.00132351
Goniatites globostriatus	Korn & Ebbighausen (2008, text-fig. 25)	0.571418	-0.82042	0.717668	0.511262	-0.0605161	-0.173459	0.34973	-0.123931	0.312558	0.0837283	0.0429849	-0.15413	-0.0842725	0.0684326	0.00461775	0.00623027	-0.00594785	-0.0661956	0.0607842	-0.0040796	-0.0104557	-0.00576412	0.0290505	-0.0483639	0.0511562	-0.0237904	-0.00383199	-0.00964411	-0.00618129	0.0313736	0.0104105	0.00202784	-0.0246519	-0.024873	0.0130304	-0.0116661	0.0142184	-0.00224061	-0.00150931	-0.0119653	0.0014427	-0.00420185	-0.00661782	-0.00352297	-0.00387389	-0.0068348	0.0044017	-0.00200618
Goniatites hudsoni	Korn & Tilsley (2006, text-fig. 24C)	0.622841	-0.782339	0.54231	0.435324	-0.0196414	-0.0823092	0.247866	-0.0538129	0.194431	0.091945	0.0589662	-0.1213	-0.066315	0.0330213	-0.005042	-0.0108671	0.018349	-0.084591	0.0230431	0.00596857	0.0155152	0.0190243	0.0256113	-0.0196754	0.0223055	-0.000558851	0.000485233	-0.0295084	-0.0113202	0.0154095	-0.00851441	-0.0063776	-0.00870661	-0.0335475	0.0152658	-0.00348268	0.0210122	0.00900402	0.00465206	-0.00859748	-0.00878581	0.00505839	-0.00528553	-0.0113669	0.00150159	-0.00971568	-0.00245999	-0.0006531
Goniatites lazarus	Korn et al. (2005, text-fig. 3.6)	0.626538	-0.779344	0.569319	0.450138	-0.0134695	-0.0503405	0.240817	-0.0544162	0.203509	0.0969398	0.0667443	-0.14008	-0.080603	0.0408298	0.00218945	0.00322506	0.0214468	-0.0980217	0.0179762	0.00416611	0.0346534	0.0425316	0.0405465	-0.0324776	-0.00249617	0.000561736	5.18583e-05	-0.0224439	0.000218063	-7.91974e-05	-0.00196374	-0.00135414	-0.00427985	-0.018661	0.0198134	-0.00490276	0.0152454	0.00731647	0.00176145	-0.00339694	-0.00219975	0.00129662	-0.00761417	-0.0156231	0.000787738	-0.00325018	0.0037475	0.000448062
Goniatites moorei	Korn & Tilsley (2006, text-fig. 26F)	0.631553	-0.775315	0.58967	0.47586	-0.0443704	-0.217839	0.264743	-0.0575406	0.251164	0.131594	0.0733851	-0.144375	-0.0700981	0.0296943	-0.0126493	-0.0297779	0.0154796	-0.0537657	0.0324192	0.00892599	-0.0190569	-0.0274232	0.032173	-0.0235892	0.0587403	0.00452604	0.000786154	-0.0207423	-0.0233172	0.0243205	-0.0158959	-0.0146758	-0.00425133	-0.0343221	0.0146441	-0.0020477	0.00610817	0.00395307	0.00448626	-0.00841711	-0.00293415	0.000861014	-0.00431771	-0.0113324	0.00461729	-0.0121722	-0.00592978	-0.00177158
Goniatites rodioni	Klug et al. (2006, text-fig. 21F)	0.598847	-0.800856	0.439586	0.324966	-0.046199	-0.147125	0.242203	-0.0719207	0.189027	0.0663288	0.0463829	-0.13079	-0.0781587	0.0543102	-0.00655408	-0.0107442	0.00502203	-0.114087	-0.00765951	0.000138809	0.0203417	0.0156656	0.0203523	-0.0253994	-0.00555928	0.00169173	-0.00284689	-0.0132624	-0.00197987	0.00517733	-0.021547	-0.00855323	-0.0121763	-0.0205195	0.00152275	-0.00150246	0.00347631	0.000109802	0.000207175	0.00181874	-0.00299584	0.00338585	-0.00849949	-0.00703798	0.00083276	0.00409496	-0.00569044	0.000424699
Goniatites spirifer	Korn (1990, text-fig. 12B)	0.622421	-0.782441	0.719545	0.581801	-0.0457075	-0.215982	0.312607	-0.0697568	0.325683	0.161598	0.0768994	-0.154721	-0.124801	0.0564369	-0.00817391	-0.0164714	0.0225476	-0.0892633	0.0626073	0.0155113	0.00747653	0.0104765	0.0558462	-0.0430143	0.0310995	0.000285303	-0.000269318	0.0040788	-0.00482971	0.00565549	-0.00538001	-0.00540791	-0.00255699	-0.0114108	0.0284414	-0.00482281	-0.00582213	-0.00316882	0.00178076	-0.00453155	0.0199101	-0.00884548	-0.00469356	-0.0119172	-0.0016329	0.00531549	0.00471759	0.00154098
Goniatites stenumbilicatus	Klug et al. (2006, text-fig. 28B)	0.727403	-0.686196	0.509391	0.535561	0.0201881	-0.44615	0.407875	0.0220151	0.25171	0.290197	0.139592	-0.119647	-0.0691111	-0.0055962	0.00404486	-0.0399541	0.0178422	-0.0133501	-0.00735663	-0.00925013	0.0108972	-0.0756257	0.0569425	0.00869709	0.0386817	0.0537164	0.0315604	-0.0215792	-0.020557	-0.00325165	0.00450881	-0.0227602	0.0122861	-0.00813335	-0.00193417	-0.00364694	0.00158624	-0.00327336	0.0118642	0.00319724	-0.00877284	-0.0141676	0.018284	-0.00974621	0.0282057	0.00763879	0.00312227	-0.0108422
Goniatites deceptus	Korn & Titus (2011, text-fig. 48E)	0.583439	-0.812153	0.600227	0.433247	-0.080636	-0.243813	0.243046	-0.0815688	0.288075	0.0904309	0.0411856	-0.132003	-0.08904	0.0658941	-0.0247709	-0.0328608	-0.00175978	-0.101556	0.0114119	-0.000162138	0.00431902	0.00324814	0.0254655	-0.0367562	0.0195666	-0.00714239	-0.00485048	-0.0137071	-0.00197233	0.0066258	-0.029675	-0.00828127	-0.00849094	-0.0106652	0.0107963	-0.00829589	-0.012931	0.000380584	-0.000182234	-0.000417861	0.0080862	-0.0119583	-0.0164887	-0.0109353	0.0029927	0.00841409	-0.00387249	0.00182888
Goniatites deceptus	Korn & Titus (2011, text-fig. 48F)	0.568736	-0.82252	0.653308	0.451613	-0.0410947	-0.118793	0.252052	-0.0982086	0.27849	0.0743689	0.0370363	-0.147125	-0.0847838	0.0695983	-0.0130612	-0.0147468	-0.00821312	-0.0960476	0.0371617	-0.00464252	0.0318581	0.0184164	0.0234559	-0.0447233	0.0174113	-0.00878409	-0.00934558	-0.0166042	-0.00205635	0.0113912	-0.0125486	-0.00248577	-0.0138787	-0.0137336	0.018235	-0.0188402	0.00982472	-0.00181349	-0.00295409	-0.00575067	0.00285616	-0.00696015	-0.0162071	-0.00739006	0.00227223	0.00366141	0.00319659	-0.00139267
Goniatites eganensis	Korn & Titus (2011, text-fig. 54C)	0.652547	-0.757738	0.552059	0.478957	-0.0381383	-0.253062	0.298869	-0.0433349	0.294048	0.185092	0.0963182	-0.150566	-0.120153	0.0369219	-0.00997458	-0.0329692	0.0381676	-0.0872786	0.000942743	0.00107689	0.00430339	0.00899596	0.0675991	-0.0318004	0.0272664	0.00739587	0.00375711	-0.0136103	-0.00870701	0.00594397	-0.01629	-0.0249584	0.00114384	-0.0106403	0.0170952	0.00206754	-0.00811794	-0.00875141	0.0060247	-0.00495122	0.0184444	-0.000640115	-0.000409785	-0.019907	-0.00622062	0.00775649	-0.00362473	-0.00321876
Goniatites eganensis	Korn & Titus (2011, text-fig. 54D)	0.63673	-0.771086	0.560199	0.461414	-0.0337298	-0.164143	0.218536	-0.0409338	0.222387	0.118371	0.0642934	-0.11853	-0.076374	0.0327427	-0.013916	-0.0357451	0.0241622	-0.0801494	0.0125809	0.00419165	0.00191868	0.00274705	0.0363144	-0.0234156	0.0324905	0.00312505	0.00260717	-0.0174729	-0.0159038	0.016608	-0.0169634	-0.0171785	-0.0036322	-0.0338225	0.011734	-0.0012766	0.0103291	0.00637162	0.0040752	-0.00474258	-0.00258222	0.00118642	-0.00345112	-0.0122221	0.00155275	-0.00446334	-0.00887185	-0.00390374
Hibernicoceras artilobatum	Korn & Ebbighausen (2008, text-fig. 44E)	0.545094	-0.838371	0.638028	0.416985	-0.0470921	-0.113606	0.230469	-0.103718	0.272332	0.0481657	0.0233467	-0.140479	-0.0739893	0.07645	-0.0233275	-0.0209532	-0.0234327	-0.100165	0.0321035	-0.00842968	0.0398712	0.0149214	0.0142173	-0.043235	0.00933978	-0.00775108	-0.0117743	-0.014224	0.000202953	0.00383855	-0.017801	0.000937502	-0.014145	-0.00775133	0.0102295	-0.017602	0.00723227	-0.00385002	-0.00286127	-0.00270784	0.000986672	-0.00953553	-0.0217375	-0.00245649	0.00468557	0.00415426	0.00121836	-0.000455087
Hibernicoceras carraunense	Korn & Ebbighausen (2008, text-fig. 40F)	0.55267	-0.832062	0.801891	0.515493	-0.0961872	-0.213759	0.264254	-0.117941	0.35589	0.0599791	0.0272619	-0.170697	-0.0723101	0.0805369	-0.00209947	-0.00285259	-0.016218	-0.0641933	0.0314721	-0.00889066	-0.00470275	-0.00154953	0.02089	-0.0626754	0.0434145	-0.0330374	-0.00748472	-0.00941839	0.00239346	0.0233571	-0.0135926	0.00115728	-0.0148061	-0.00778807	0.013079	-0.0258907	0.00207505	-0.00147864	-0.00517272	-0.00997523	0.00169619	-0.0106723	-0.014041	-0.000587518	-0.00366076	-0.00245349	0.0015421	-0.00240091
Hibernicoceras touissitense	Korn & Ebbighausen (2008, text-fig. 42F)	0.621911	-0.770375	0.775978	0.630387	-0.0525645	-0.243362	0.345821	-0.0724269	0.34569	0.173875	0.0733231	-0.143513	-0.101553	0.0460893	-0.00253887	-0.00432791	0.0135499	-0.0519284	0.0531567	0.0145205	-0.00665955	-0.00919614	0.048674	-0.0354201	0.0607427	0.00263915	0.000767363	-0.0168595	-0.0166524	0.0189804	-0.00338783	-0.00305651	-0.00202479	-0.0120066	0.0368553	-0.00583414	0.000772138	0.000484307	0.00458821	-0.00755881	0.00885104	-0.00368069	-0.00354781	-0.0090471	0.0030681	-0.00966074	0.00791266	0.00267771
Hypergoniatites exiguus	Ruzhencev & Bogoslovskaya (1971, text-fig. 38d)	0.606202	-0.795194	0.623081	0.464192	-0.0339631	-0.113974	0.334646	-0.0961852	0.264757	0.102744	0.05198	-0.137862	-0.0976983	0.0614187	0.00640511	0.00898863	0.00954055	-0.100961	0.037443	0.00328188	0.0270636	0.0248772	0.0364908	-0.0415575	0.0192107	-0.00331931	-0.00244422	-0.0136594	-0.00626764	0.0133787	-0.0016989	-0.000811595	-0.0112764	-0.0223071	0.0192411	-0.0102951	0.0135178	0.00228065	0.00302087	-0.0152612	0.00270224	-0.00167183	-0.00529306	-0.00492474	-0.000157394	0.00199664	0.00500278	-0.000984243
Hypergoniatites fusiger	Klug et al. (2006, text-fig. 30D)	0.528864	-0.848704	0.608619	0.381073	-0.0710492	-0.141399	0.298283	-0.144092	0.254875	0.0237239	0.0121997	-0.11813	-0.0644348	0.0862946	0.00388704	0.00284226	-0.0428872	-0.111244	0.0208926	-0.00736486	0.0346977	0.0063716	0.00982401	-0.0466977	0.00390811	-0.00377931	-0.00532162	-0.0058375	0.000118801	0.000608502	-0.0121018	0.00309658	-0.0211962	-0.00636065	0.00498574	-0.0149195	0.0022039	-0.00197037	-0.00503867	-0.00637927	-0.00133455	-0.00718939	-0.0106153	0.00168403	0.00489572	0.00170354	-6.86509e-05	-0.000835467
Hypergoniatites tenuiliratus	Ruzhencev & Bogoslovskaya (1971, text-fig. 37v)	0.580329	-0.814345	0.674655	0.475395	-0.00706103	-0.0237836	0.383338	-0.135615	0.22973	0.0695786	0.0253476	-0.0893482	-0.0810599	0.0616461	0.0174498	0.0213943	-0.00313411	-0.0976533	0.0517728	-0.0034687	0.0500986	0.0335629	0.025731	-0.0417679	0.00331575	-0.00163179	0.000379781	0.00095579	-0.00188811	0.00775187	0.00726788	0.00117774	-0.0136555	-0.0159867	0.0198749	-0.0179359	0.0275072	-0.00220838	-0.00113127	-0.0082789	-0.00576428	0.00959808	0.00146219	0.000496324	-0.00365633	-0.00785336	0.00912985	-0.00439311
Lusitanoceras zirari	Korn & Ebbighausen (2008, text-fig. 50F)	0.319939	-0.80077	0.925381	0.378769	-0.138845	-0.135084	0.267604	-0.275028	0.321295	-0.144098	-0.0511261	-0.116726	0.00449589	0.128477	0.0510557	-0.00107096	-0.0625991	-0.0225659	0.0210668	-0.0558283	0.000892801	-0.000915443	-0.0468791	-0.0423158	-0.0218234	-0.0434676	0.0258711	-0.0131441	0.0171989	-0.00120998	-0.00034665	-0.00900027	-0.00365671	0.0115924	-0.0174151	-0.0064372	-0.0065202	-0.00531871	-0.00284297	0.0031533	-0.0131616	0.00751139	-0.000183036	-0.000764617	-0.000480125	-0.0031048	-0.00763544	0.000472908
Neogoniatites canovasi	Korn & Feist (2007, text-fig. 19)	0.602103	-0.79838	0.701556	0.524327	-0.11278	-0.376598	0.263125	-0.0756023	0.35611	0.131328	0.0607476	-0.162317	-0.0939191	0.0621697	-0.0244308	-0.0387156	0.00494647	-0.0760946	0.0143334	0.00127895	-0.0206365	-0.0183459	0.0431759	-0.0499732	0.0304917	-0.00646124	-0.000505247	-0.006804	0.000924332	-0.00202931	-0.0335269	-0.0147521	0.00156725	0.00217725	0.0143284	-0.00845303	-0.0264687	-0.00370507	0.00194963	-0.0084838	0.00752454	-0.00767077	-0.0128289	-0.0126578	-0.000560479	-0.00391188	-0.00146739	0.000119376
Neogoniatites latus	Ruzhencev & Bogoslovskaya (1971, text-fig. 36g)	0.28479	-0.539499	0.88417	0.467165	-0.140825	-0.210756	0.314302	-0.214833	0.365941	-0.0383719	-0.0102257	-0.0929366	-0.0394271	0.0966215	0.0451949	0.0177462	-0.00224838	-0.00320566	0.0487343	-0.0420989	-0.0224064	0.00466162	-0.0119951	-0.054171	0.0119838	-0.0417664	0.0257171	0.00749842	0.00737015	0.00708981	0.0127504	-0.0145471	0.00783918	-0.00269917	-0.00763007	-0.0226834	8.87976e-06	0.00048595	0.00517538	0.000906603	0.000508715	0.000682959	0.00534593	-0.00727807	-0.0134202	0.00564319	-0.00384937	-0.00773015
Neogoniatites milleri	Ruzhencev & Bogoslovskaya (1971, text-fig. 36v)	0.323909	-0.655124	0.892746	0.450476	-0.206152	-0.276258	0.332854	-0.24876	0.388244	-0.0712599	-0.0202893	-0.113574	-0.0189137	0.0636825	0.0213213	0.00650575	0.00749286	0.00712584	0.0281555	-0.0293581	-0.041465	0.0151488	-0.0261004	-0.0696991	0.00653516	-0.0615952	-0.00655845	-0.000240626	0.0114785	0.0078813	0.00924829	-0.0153775	-0.0025619	0.00107795	-0.0148742	-0.0255757	-0.000160818	-0.00734128	-0.00828053	0.000296144	0.00800514	0.00408636	0.00150931	-0.00332582	-0.0231006	0.0196584	-0.00202059	-0.00260544
Neogoniatites ruginosus	Ruzhencev & Bogoslovskaya (1971, text-fig. 36a)	0.463258	-0.705776	0.838592	0.544708	-0.127219	-0.297222	0.377675	-0.167997	0.377591	0.0673435	0.0216754	-0.131029	-0.0559105	0.0586025	0.0172541	0.0156324	-0.0040939	-0.0168726	0.0592578	-0.0155468	-0.0441053	-0.0165584	0.0172426	-0.0511985	0.0558363	-0.040912	-0.00398282	-0.00422469	0.000365818	0.0144921	0.0110473	-0.00141133	-0.00768304	-0.00492725	0.0129157	-0.0239802	0.00400983	-0.00152992	-0.00260589	-0.00341299	-0.000643333	0.000881639	-0.00337548	-0.000333256	-0.0220714	-0.0193879	0.00236033	-0.00365888
Neogoniatites worki	Klug et al. (2006, text-fig. 33B)	0.469369	-0.883002	0.847339	0.450444	-0.236069	-0.359912	0.336252	-0.229172	0.415446	-0.0372135	-0.0183015	-0.174364	-0.0490293	0.111906	0.0150448	0.00675267	-0.0516245	-0.0645545	0.0243628	-0.0213025	-0.0347116	0.00694725	-0.0118184	-0.0552145	0.012685	-0.040402	-0.00616669	-0.000872165	-0.00810245	-0.00807957	-0.00847039	0.00788253	0.00313094	-0.000367018	-0.00269415	-0.0092132	-0.00584122	0.0260596	-0.00649956	-0.000395899	-0.0144424	-0.0124321	-0.0123581	0.0151379	-0.00816251	0.00332117	-0.000206504	-0.00162488
Paraglyphioceras celeris	Korn & Ebbighausen (2008, text-fig. 48D)	0.557372	-0.830194	0.809874	0.540811	-0.104462	-0.249567	0.299823	-0.122244	0.372162	0.0735529	0.035284	-0.176448	-0.0825687	0.0835596	-0.00341971	-0.00366281	-0.0129496	-0.0648934	0.0504693	-0.00946436	-0.0133871	-0.0055216	0.0270897	-0.0649985	0.0426188	-0.0286857	-0.00182141	-0.00346368	0.000510078	0.0176025	-0.0103501	0.000455735	-0.0115626	-0.00745855	0.0180025	-0.0273444	-0.00537141	0.00185306	-0.00357203	-0.010016	0.00270884	-0.0114013	-0.00871842	-0.0015824	-0.00611663	-0.0057509	0.00312574	-0.00303669
Paraglyphioceras rudis	Korn & Ebbighausen (2008, text-fig. 46G)	0.605615	-0.795462	0.76541	0.589752	-0.0812478	-0.311722	0.338832	-0.0916301	0.375129	0.156539	0.0749711	-0.181641	-0.0978916	0.0549659	-0.0125594	-0.0216897	0.00724162	-0.0527042	0.0683855	0.00912008	-0.0218467	-0.0220697	0.041109	-0.0414425	0.0584951	-0.00754389	-0.00165813	-0.0102809	-0.00592485	0.00941809	-0.0132747	-0.00793765	-0.00266556	-0.00696196	0.0229694	-0.00920753	-0.00606422	-0.0013401	0.00344087	-0.0147559	0.00615339	-0.00532551	-0.00647655	-0.00855272	0.000520063	-0.0176563	-0.00374382	-0.000134934
Platygoniatites molaris	Ruzhencev & Bogoslovskaya (1971, text-fig. 41g)	0.260639	-0.387169	0.834112	0.551577	-0.139929	-0.331049	0.318225	-0.133575	0.337052	0.0648084	0.0142246	-0.0750149	-0.0249605	0.0261104	0.0290189	0.0287739	0.00305221	0.0144452	0.0611049	-0.0135334	-0.0124728	-0.00489234	0.00801589	-0.0206631	0.0150606	-0.00990196	0.00161832	0.0016332	-0.000548862	-0.0288054	-0.00268135	0.000201939	0.0247114	0.0158832	0.0248503	-0.0394905	0.00401559	-0.00173392	0.00358267	0.00742515	-0.00272168	0.0168639	0.00376062	0.000886121	-0.0182972	-0.017235	0.0124972	-0.0133724
Platygoniatites nudus	Ruzhencev & Bogoslovskaya (1971, text-fig. 41d)	0.342277	-0.503597	0.828461	0.560043	-0.115146	-0.304249	0.304905	-0.124215	0.341501	0.0824627	0.0159315	-0.0728955	-0.0468826	0.0408466	0.0309268	0.0322866	-0.00136859	-0.0113922	0.0433064	-0.00775901	-0.0144139	-0.0076508	0.0125519	-0.0283045	0.0339409	-0.0186443	-0.0023025	-0.00336896	0.000909145	-0.00885289	0.0109246	-0.000388278	0.0137762	0.0117743	0.0201175	-0.0255599	-0.00482826	0.00130542	0.00133796	0.00710338	2.29447e-05	-0.00136624	0.00171297	6.12417e-05	-0.0118807	-0.0169423	0.00578238	-0.00545489
Platygoniatites omniliratus	Ruzhencev & Bogoslovskaya (1971, text-fig. 39v)	0.2715	-0.450291	0.853804	0.520586	-0.162041	-0.303687	0.332099	-0.171327	0.352566	0.0181923	0.00615216	-0.0943311	-0.0255597	0.0383587	0.0398328	0.0282482	0.00774659	0.0165912	0.0563039	-0.0242126	-0.0290569	-0.00303817	0.00410532	-0.0296885	0.0228527	-0.030402	-0.00443261	-0.00332405	-0.00300657	-0.00798346	0.0133716	-0.00419346	0.0161161	0.00269426	0.00749356	-0.0420783	0.00236834	-0.00324627	0.00824196	0.00651442	0.00532936	0.01416	0.00914843	-0.00261067	-0.033404	-0.00678985	0.00234984	-0.00742625
Platygoniatites rhanemensis	Klug et al. (2006, text-fig. 41F)	0.341001	-0.683809	0.893977	0.448106	-0.0674897	-0.0879447	0.258955	-0.193277	0.26996	-0.0513249	-0.0108804	-0.0593001	-0.0274438	0.0985154	0.0637851	0.018931	-0.0464331	-0.0418087	0.0398069	-0.042996	0.0148645	-0.00594776	-0.00479855	-0.013688	0.00426916	-0.0470364	0.0247997	0.002705	0.0218044	0.0133112	0.00161001	-0.00162304	-0.0077871	0.00490687	-0.00814999	-0.0132559	-0.0017068	-0.018042	0.00144739	-4.18048e-05	0.00105531	0.000330487	0.000881964	-0.00142866	0.0030479	-0.00266923	-0.00943728	-0.0105674
Platygoniatites superior	Ruzhencev & Bogoslovskaya (1971, text-fig. 42v)	0.227829	-0.389635	0.857508	0.51444	-0.150264	-0.287199	0.278891	-0.152078	0.322969	0.0167884	0.0020817	-0.0651606	-0.0220404	0.0305587	0.021693	0.0125663	0.00367511	0.00695464	0.0585312	-0.0273113	0.00111689	0.000339514	0.00110206	-0.0166218	0.00212683	-0.00524847	-0.00255056	-0.000938981	-0.0140638	-0.036962	-0.0094058	0.00279146	0.0440161	0.00715917	0.00736652	-0.0487734	-0.00194153	0.0017853	-0.000752041	0.000866016	0.00549621	0.0163017	0.0031877	-0.00216326	-0.0187123	-0.00421277	0.00478211	-0.0260927
Progoniatites maghribensis	Korn et al. (2003, text-fig. 32B)	0.468319	-0.883558	0.746941	0.394857	-0.114994	-0.174004	0.231774	-0.15987	0.305215	-0.029942	-0.0162414	-0.144813	-0.0420604	0.0992929	0.00347503	0.00147674	-0.0620754	-0.0755818	0.0153211	-0.0136603	0.0132614	-0.00247189	-0.0114212	-0.0509442	0.00881022	-0.0303937	-0.0121768	-0.00249834	0.00918344	0.00930711	-0.0096988	0.00959226	-0.0209236	0.00659851	-0.00618908	-0.0188525	7.09069e-05	-0.000545815	-0.00757959	-0.000673204	-0.0102834	-0.00816948	-0.00791353	0.0106144	0.00325088	-0.00126578	0.000619827	0.00110076
[truncated: 72 more columns]

## Sheet: PCA EL
species	source	PC1	PC2	PC3	PC4	PC5	PC6	PC7	PC8	PC9	PC10	PC11	PC12	PC13	PC14	PC15	PC16	PC17	PC18	PC19	PC20	PC21	PC22	PC23	PC24	PC25	PC26	PC27	PC28	PC29	PC30	PC31	PC32	PC33	PC34	PC35	PC36	PC37	PC38	PC39	PC40	PC41	PC42	PC43	PC44	PC45	PC46	PC47	PC48
Arnsbergites arnsbergensis	Korn (1988, text-fig. 48B)	0.01649	-0.076403	-0.62249	1.5461	-2.1617	-0.49582	0.1059	-0.43773	0.96617	0.65923	0.11893	0.37952	-0.16545	-0.61741	1.0536	2.1511	1.0859	1.3043	1.0856	1.747	-0.22624	-0.27843	-1.0244	0.84994	0.391	-0.1049	-0.34959	1.2878	0.27854	-0.42264	-0.46855	0.59569	1.5182	0.71607	1.2428	1.0928	0.68502	0.33041	-0.0167	-1.2337	-1.3907	2.1062	0.50469	0.58098	0.16464	0.23488	-1.1782	-0.60307
Arnsbergites ferrus	Korn & Ebbighausen (2008, text-fig. 31G)	0.022122	1.0285	-0.8658	0.078272	-1.4553	0.26535	0.16401	-0.65986	-0.40648	-0.83104	-0.70258	-0.42701	0.5119	-0.74586	-1.0797	-0.13239	-0.077555	0.1179	-0.27093	-0.11691	0.044046	-0.49076	0.26376	1.8003	-0.13315	0.51648	-0.70398	1.2474	-0.3024	0.46251	1.2498	-1.0605	0.37416	1.0971	1.355	1.099	-1.0157	0.17969	1.2617	0.92229	-1.9686	-3.3054	1.1954	-1.3104	-0.42466	-1.8374	0.98813	-0.19648
Arnsbergites gracilis	Korn (1988, text-fig. 45C)	-0.30166	-0.09599	-0.72674	1.3824	-1.2468	-0.051694	0.52226	0.82191	-0.41618	0.39358	-0.19305	1.3058	0.091833	0.5732	0.79614	1.3138	-0.99593	-0.159	-0.6586	-0.48166	0.61968	-0.76645	-0.53751	0.2634	0.48483	-0.69184	-1.1254	0.11797	0.35535	-0.47606	-0.099297	0.11268	0.074778	0.49194	-1.8719	1.0237	-0.13654	0.94709	-1.8077	1.7496	1.5401	-0.25925	-0.41407	0.51193	1.3148	0.34852	-0.95617	-1.5562
Arnsbergites proiecturus	Korn & Ebbighausen (2008, text-fig. 35C)	-1.6798	0.9239	1.7964	-0.12856	-0.62952	1.2319	-1.2656	1.3673	0.56864	2.3588	-0.23807	-0.93331	2.4312	1.9757	-0.68687	0.90843	2.3776	-0.4617	-0.24098	0.90348	-1.3442	0.45594	2.5844	0.38822	1.6889	0.49438	-0.65578	-0.46179	-0.41063	0.064123	1.1257	-0.60856	-0.36537	0.0034079	-0.41905	-0.45182	0.2264	0.17184	0.29993	0.73745	0.10289	0.05185	0.050738	0.27052	0.010584	0.40118	-0.055494	-0.26673
Arnsbergites robustus	Korn & Ebbighausen (2008, text-fig. 26B)	-0.42308	1.1586	-0.79573	0.32111	-0.65541	0.65203	0.12774	1.1464	-0.23011	-0.75328	0.36598	-0.32741	-0.72856	-2.316	-1.5923	-0.72539	1.2491	0.12341	0.24634	-0.57909	1.1825	-0.4338	0.45941	1.8149	0.1615	-0.22861	-0.085336	-1.237	-0.25022	2.0476	-0.77206	-0.52225	-1.0218	1.127	-0.46278	0.68531	0.57297	0.32171	1.7559	-1.3593	2.1933	1.996	-1.178	-0.26692	-0.47725	0.64994	0.86687	-1.2553
Arnsbergites rufus	Korn & Ebbighausen (2008, text-fig. 38B)	0.18762	-0.3353	-1.2436	-2.6618	-0.7269	-0.58111	-0.40991	-0.053356	-1.8263	0.4386	1.2307	-0.38412	1.2549	-0.19751	0.77804	2.1683	0.032738	-1.5839	2.0342	0.55537	1.9356	1.1822	0.83285	0.27558	-0.63678	-0.077987	2.4428	-0.21852	-1.1928	-0.74271	-0.81564	0.20099	-0.81093	-0.63322	-0.52321	0.18567	-0.079779	0.3754	-0.66867	-0.93639	-0.83708	-0.55058	-0.25461	-0.98139	0.82492	0.80481	1.0075	0.44075
Arnsbergites sphaericostriatus	Korn & Ebbighausen (2008, text-fig. 28D)	-0.97916	0.50487	0.34158	-1.4547	-0.48231	0.21275	-0.43612	-0.0034423	0.43205	-2.3684	0.78977	0.85724	0.12915	-0.092267	-1.0565	-0.45311	1.7609	1.1879	-1.4281	-0.82589	-1.4403	-1.4389	0.46135	-0.1468	-1.2561	-0.049302	-0.34976	0.26593	0.33542	-1.7018	-0.93531	1.3969	0.65885	-0.1786	-2.5611	0.66457	-0.38525	-0.75017	-0.69228	-1.0127	-0.4228	-0.35693	-0.039048	-1.9116	0.24243	0.50358	0.23883	0.17228
Arnsbergites warslowensis	Korn & Ebbighausen (2008, text-fig. 26C)	-0.55459	0.65597	-0.399	0.73024	-0.23511	0.50456	0.15276	1.7768	-1.6616	-0.69616	1.4184	0.010307	-1.2116	-1.8996	-0.91042	0.49286	0.15248	0.12869	0.56609	0.32907	0.96386	-0.75608	-0.5832	-0.8071	1.0855	0.89851	-0.58266	-1.9028	-1.1552	-0.66999	1.7944	-0.12343	0.35205	-0.66066	0.21472	-1.0089	-2.1934	0.15961	0.21066	1.0278	-0.82776	0.21692	1.4624	-0.029981	-0.17132	1.4011	-1.8723	1.8976
Revilloceras bellornatum	Klug et al. (2006, text-fig. 37B)	-0.81887	1.4136	0.068233	0.45659	0.65334	2.0072	-0.17698	0.64383	-1.9819	-0.020837	0.27914	1.0692	-1.1337	-1.0224	0.63072	-0.78681	0.014229	1.0528	2.0446	0.33232	-1.9836	2.9055	0.32517	-1.8777	0.35008	-2.1273	-0.838	0.57361	0.55165	0.14539	-0.4144	0.088667	0.28915	1.4332	-0.21852	-0.38048	0.49	0.61323	-0.90468	-1.1321	-0.36401	-1.3024	-0.7603	0.51926	0.35113	-0.7706	0.55097	0.44535
Dombarites carinatus	Ruzhencev & Bogoslovskaya (1971, text-fig. 46a)	0.77742	1.4944	0.15021	-0.079033	0.91118	-0.52103	0.96299	-1.0216	0.2244	-0.17428	-0.53234	-1.9092	-0.2684	-0.44991	0.66817	-0.16908	-0.20011	-0.20703	-0.22883	0.39656	0.036255	-1.2514	0.68908	-2.4735	0.45441	1.2295	0.3044	-1.0813	-1.1354	0.17331	0.93847	0.3699	0.62436	1.2453	-0.24464	1.013	-0.17779	-0.28474	-1.5183	-0.23739	0.33817	-0.9483	0.22961	0.33202	2.2482	-0.34166	-1.1011	-1.5496
Revilloceras granofalcatum	Klug et al. (2006, text-fig. 35F)	0.39107	1.2723	-1.5694	-0.7364	1.4941	-0.43575	0.34905	1.3034	0.36748	-0.57794	-0.74705	0.065788	0.90617	0.81534	-1.9982	-0.36239	-1.9866	-0.080007	0.12726	-0.31755	-0.71174	0.94789	-0.34839	1.6435	-0.3834	-0.84825	-0.10219	1.7976	0.20084	0.81445	0.18865	0.24972	-1.7263	-0.52544	-1.1164	-1.7676	-0.56316	0.99226	-1.157	0.70226	-0.75359	0.78402	1.1538	-0.065384	0.46632	0.59189	-1.5452	-1.2621
Dombarites falcatoides	Ruzhencev & Bogoslovskaya (1971, text-fig. 44d)	-0.79605	1.6534	-0.090648	0.099159	-1.6125	2.1489	0.51949	0.5504	-0.2656	0.92723	-0.67263	-0.089752	0.89048	0.75625	2.3881	-2.329	-0.14097	2.0462	-1.7869	-1.079	2.2911	0.8038	-0.36948	0.35113	-1.5517	0.44598	1.6772	0.29627	-0.72411	0.19122	-0.22338	0.42507	0.11508	-1.1193	0.41384	0.010794	0.4101	0.20908	-0.15551	-0.75871	0.18268	0.007639	1.5422	0.72704	0.37459	0.18399	-0.52323	0.1785
Dombarites linteroides	Ruzhencev & Bogoslovskaya (1971, text-fig. 51b)	0.7542	1.1536	-0.46524	-0.39954	0.66494	-0.36939	-0.25319	-1.4839	-0.53598	-0.6359	-0.90177	-0.79409	1.139	0.27119	-0.20186	0.4764	0.048264	1.3515	0.2878	-0.3108	-0.055959	-0.56303	-0.11589	0.011665	1.3131	-1.3353	0.18887	-0.50428	-1.0485	-0.7114	-0.54991	-0.54405	0.72498	-0.86601	-0.37257	0.12393	-0.87706	-0.48539	0.3694	0.80217	2.7716	0.95132	-1.0523	0.41355	1.4423	-0.91416	0.29425	1.5251
Dombarites liratostriatus	Ruzhencev & Bogoslovskaya (1971, text-fig. 50v)	0.67432	1.2849	0.14647	0.26522	0.45154	-0.39428	0.47558	-1.5253	-0.36213	-0.67479	-0.41785	-1.1694	0.61289	-0.71691	0.93619	1.0255	0.79907	0.13486	0.44873	-0.19328	-1.3151	0.20339	0.80206	0.80263	-0.85124	-1.0934	-0.20171	1.3238	1.4133	-0.66134	0.90497	0.69558	-0.65098	-1.9566	0.75664	0.27317	-1.408	-0.51784	1.4384	-0.53315	0.20123	1.2988	0.18545	-0.10031	0.94448	-1.0845	-0.35955	0.50778
Dombarites liratus	Ruzhencev & Bogoslovskaya (1971, text-fig. 50b)	0.45813	0.50832	-0.068772	1.4687	1.1966	-0.32133	0.68075	0.85642	-0.70731	-0.014582	2.1393	0.044014	-1.4432	1.005	0.54649	0.46564	0.38125	-1.5271	-1.7625	1.6929	-1.1865	-0.56421	0.58851	0.74213	-0.39234	-0.91366	0.13111	-1.0007	0.72543	0.18497	-1.5683	1.1796	-0.85149	-1.6767	1.2347	1.2113	1.6281	0.85535	0.16257	0.24462	1.1049	-1.2858	2.0192	-0.82617	0.096335	0.34156	0.36106	0.58172
Dombarites parafalcatoides	Ruzhencev & Bogoslovskaya (1971, text-fig. 49v)	0.22118	-0.15398	-1.1881	1.3231	0.90733	0.24298	-0.73927	-0.056654	-0.42832	0.72629	1.8227	0.34751	-0.25575	0.47303	-0.25433	0.07286	-0.433	1.1411	-0.98466	0.45171	0.8908	-0.98333	1.1214	0.90982	-0.44204	0.01164	0.5308	-0.057846	0.31969	-0.79589	-1.359	-1.5702	-1.7863	1.0867	0.62043	-0.38459	-0.98732	-0.90955	-0.48409	1.2973	-1.0338	0.18897	-1.6465	2.3706	0.38809	-2.0042	0.89182	0.84886
Dombarites paratectus	Ruzhencev & Bogoslovskaya (1971, text-fig. 48g)	1.326	1.0594	0.2143	-0.85504	0.73305	-0.82218	0.90335	0.54313	-0.15085	0.075448	-0.53113	0.10874	0.69186	-0.30198	-0.093748	1.7303	-0.063758	2.0601	-0.72013	-0.50707	-0.31187	0.50147	-1.7138	0.073934	2.6867	1.0229	1.0698	-0.061701	0.7208	-1.2638	-1.8484	0.71505	0.1421	0.73016	-0.13741	-1.3224	1.2281	-0.1898	2.1098	0.28982	0.28943	-2.0299	0.44221	0.94642	-1.3978	0.92588	0.060196	-0.36374
Dombarites semiliratus	Ruzhencev & Bogoslovskaya (1971, text-fig. 51v)	0.49559	1.6223	0.17645	0.05642	0.013598	-0.11374	1.1059	-1.1349	0.328	-0.16382	-0.57835	-2.0172	-0.07646	-1.2781	1.6977	-0.048164	0.069639	0.25312	0.98949	0.2825	-0.0078006	-0.84004	0.90978	-0.10871	-0.85369	0.24321	-0.90862	-0.49785	0.90846	1.622	0.12596	0.015872	-1.2269	-0.6108	0.063123	-1.22	1.608	-1.3637	-2.0469	1.6313	-0.48626	0.010931	-0.57899	-0.29323	-2.5778	1.3219	0.48387	0.26643
Dombarites tectus	Ruzhencev & Bogoslovskaya (1971, text-fig. 48b)	0.67466	1.3028	-0.10751	0.045294	1.2062	-0.45377	1.7497	1.2948	-0.0023971	0.013895	0.63707	-0.82095	0.49338	0.86443	0.35835	-0.98381	-1.4122	-1.4361	-0.53142	-0.63237	-1.1818	1.264	-0.050362	-0.094409	-0.49385	0.0063629	0.85906	-0.77289	-0.63912	-2.1663	1.0184	-0.99727	1.2766	1.7313	0.35825	2.4811	0.11286	-0.039447	0.92763	0.18376	-1.0454	2.2606	-0.38009	-0.24425	-1.0865	0.38246	1.0358	-0.84124
Goniatites americanus	Korn & Titus (2011, text-fig. 43J)	0.10178	-0.86106	-1.2131	0.48069	-0.3612	-0.25764	0.39345	-0.63515	2.1772	2.2806	0.66229	-1.1976	-1.5668	-1.3452	-1.1088	-1.894	0.033331	0.79895	-1.0412	0.44332	-0.92127	1.282	0.049511	-0.74987	0.5473	0.10683	0.42892	0.13037	-0.58175	-1.2749	-0.40251	-1.3319	0.38667	-2.584	-0.74654	-0.94149	0.11428	0.22035	0.54556	-0.032365	-0.76159	-0.0052265	-0.54678	-0.80714	0.96534	0.35488	0.11508	0.57439
Goniatites crenistria	Korn & Ebbighausen (2008, text-fig. 18C)	-0.39013	-0.24244	-0.68346	0.5514	1.3316	-1.2642	-0.60227	-0.43015	1.6581	-0.35202	-0.17253	0.12233	-1.1516	0.49105	0.21425	-0.1551	0.44835	0.55004	0.28186	1.0452	1.0984	0.29374	1.2042	0.032208	0.91031	-0.12603	0.41853	0.60098	0.34217	0.75847	0.276	0.44106	0.65069	1.1138	-1.3252	-0.5781	-1.3106	-1.2603	-0.41543	-0.96093	-0.9009	0.4849	2.3834	1.3269	0.41505	1.9411	2.8938	-0.62752
Goniatites evelinae	Klug et al. (2006, text-fig. 26D)	-1.3881	-0.29014	1.299	-0.45624	-0.67625	-0.41973	-0.99438	0.66537	-0.027017	0.73705	-0.13656	-1.6977	-1.1155	1.3492	0.22584	-0.58235	-0.95167	0.73197	-0.10342	0.81984	-0.92696	-1.2842	-2.0902	0.88487	-0.41189	-1.3491	1.6277	-0.893	-0.47924	0.48469	0.17436	2.6551	-0.24745	1.9992	0.11159	-0.69972	-1.2154	-0.90502	-0.23488	0.57646	-0.21112	0.19888	-0.71686	-0.82856	-0.34463	-0.70458	0.61715	1.2448
Goniatites sphaericus	Korn (1988, text-fig. 38E)	-0.58478	0.17438	-0.42011	0.99331	0.12327	-0.79296	-0.071327	0.80794	0.58548	-0.25813	-0.565	-0.14022	-1.1591	0.32621	0.97246	-0.00072301	0.59531	-1.1067	0.79911	-0.032874	0.87746	-0.87441	-0.48665	-0.30271	0.90351	-0.39704	0.27392	-0.42605	-1.3661	-0.24154	0.52241	0.096114	-0.57785	-0.85309	-0.99928	-1.9311	1.3835	0.37329	0.88886	-0.96994	-0.26109	-0.6881	0.013033	-1.1922	0.57814	-3.5448	0.65361	-2.4607
Goniatites gerberi	Klug et al. (2006, text-fig. 24F)	-1.1686	-0.55971	0.87392	0.13771	-0.12696	-0.77295	-0.77642	-0.27262	-0.19863	-0.27829	-1.0704	-0.93068	-1.0265	0.48792	0.56277	-0.048545	-0.8311	-0.27946	0.12812	-0.51395	-0.21144	-0.52104	-0.89066	-0.45085	-0.51159	-0.47119	0.30951	0.71102	1.1602	0.35645	1.4325	-1.2284	-1.9196	0.63389	0.67443	0.17763	0.76982	1.151	2.5087	-0.49521	0.089644	-0.9857	-0.98059	0.20548	2.6237	2.9638	-0.17587	0.60536
Goniatites globostriatus	Korn & Ebbighausen (2008, text-fig. 25)	-0.25583	-0.50005	-0.68792	0.76421	1.0287	-0.42704	-1.4251	-1.7287	0.11353	-0.12575	0.76733	0.38432	0.33228	0.45893	1.1623	-0.70734	0.28987	0.62937	0.17334	-0.61295	1.4043	0.35092	1.4707	1.532	-0.4438	-1.3823	-0.50862	-1.2725	1.2003	-1.1595	0.11129	-0.34436	2.1408	1.2863	0.35707	-1.2183	0.38215	1.0022	0.19134	1.2729	-0.24169	-0.64533	-0.7107	-2.2178	0.046649	1.325	-1.5279	-0.79579
Goniatites hudsoni	Korn & Tilsley (2006, text-fig. 24C)	-1.1918	-1.0229	1.1388	0.30107	0.039212	-0.26399	-0.79752	-1.0219	-1.6714	-0.076539	-0.60064	-0.73925	-0.20198	-0.71579	-0.39712	0.43462	-1.6946	-0.41431	-0.57089	-1.2917	0.050906	-0.084029	0.71936	0.13591	-0.43807	0.71669	-0.57402	-0.049109	-0.81803	-1.5921	-0.2901	-0.18467	1.2333	-0.079039	0.0085472	-1.8283	1.7824	0.55818	0.043309	-0.1857	0.24548	0.86684	0.11051	0.17788	-1.5053	-0.19602	0.83699	-0.2827
Goniatites lazarus	Korn et al. (2005, text-fig. 3.6)	-1.1706	-1.0875	1.0417	0.89481	-0.14793	-0.60995	0.16227	0.68752	-0.33173	1.3892	-1.5725	-1.8337	0.55479	-1.8833	-1.1459	0.46321	-1.1327	-1.1481	0.20766	-1.0183	-0.15461	0.9681	-0.38704	1.5703	-0.2863	0.47701	-0.2174	-1.3477	2.2364	0.21424	-1.8709	-0.24227	1.0755	-0.18741	-0.66473	0.97176	-0.49966	-0.88655	-1.5307	-1.0459	-0.1139	-0.5857	1.0858	0.30244	1.1336	-0.90818	-0.31793	0.55533
Goniatites moorei	Korn & Tilsley (2006, text-fig. 26F)	-0.93192	-0.14988	0.4577	-0.51418	-0.55353	0.11113	-1.6535	-2.2371	-0.8135	-1.4231	0.17362	0.57382	-1.3007	0.6572	0.14274	-0.77969	-0.057416	-0.33228	-0.0025368	0.66651	-0.76854	2.0012	-0.61395	-0.10022	1.8895	1.715	1.7188	0.37734	-0.01327	1.4532	-1.222	-1.6332	-0.56825	0.18134	0.047605	1.2563	0.10024	-0.97011	-0.36143	1.8963	0.78813	1.1736	1.4469	-1.3534	-0.15142	-0.54225	-1.1593	-0.62987
Goniatites rodioni	Klug et al. (2006, text-fig. 21F)	-1.3217	-1.3444	1.3905	-1.8581	1.0687	-0.93311	0.77265	0.05722	-0.044183	-0.15696	0.74849	-1.2742	-0.27664	-0.048831	0.20926	-0.71374	-0.083445	0.57644	-0.075067	1.6425	1.0212	0.53232	0.49057	-0.15365	-0.27255	-1.209	-0.99169	0.67449	-0.75344	0.64186	-1.0115	0.40296	0.71378	-0.95692	0.89519	0.63841	-2.4407	1.1922	0.82585	-0.37502	0.74711	-0.7693	-0.58282	1.4197	-1.9738	-0.342	-1.7602	-2.169
Goniatites spirifer	Korn (1990, text-fig. 12B)	-0.53347	0.27995	-0.54888	1.1547	-0.48073	-0.78907	0.30697	1.351	0.85715	-0.25028	-1.1591	0.51186	0.082535	1.4759	1.8038	-0.13938	0.36825	-0.87281	1.4398	-0.034213	0.40659	0.23804	-1.6016	-0.52162	0.16369	-0.26824	-0.58113	-0.098449	0.52967	-0.24228	-0.61743	-1.6822	-0.13642	-1.4511	-1.818	0.933	-1.4471	-1.1088	0.56444	0.31555	-0.30142	-0.52126	-1.4527	-1.0567	-2.1568	0.24711	-0.058929	0.96431
Goniatites stenumbilicatus	Klug et al. (2006, text-fig. 28B)	-1.3559	1.8931	1.0175	-1.6381	2.0184	3.0922	-0.24035	-1.5771	2.6136	1.5215	0.28627	2.0793	-0.90633	-0.84789	-0.033492	1.7094	-1.5003	-1.582	0.22658	-0.12961	0.73745	-1.2616	-1.2007	0.37903	-0.15337	0.084069	-0.2448	-0.010196	0.043861	-0.16024	-0.24794	-0.1955	0.31294	-0.36821	0.39789	0.31448	-0.30755	-0.11321	0.33765	-0.18281	-0.16725	0.087246	-0.17035	-0.19312	-0.028352	-0.031352	0.08376	0.05722
Goniatites deceptus	Korn & Titus (2011, text-fig. 48E)	-0.68545	-0.57661	0.060322	-1.4235	-0.56773	-0.719	1.152	0.60138	0.004085	-1.0079	1.0851	0.99872	0.036538	0.88453	0.92053	0.15143	-1.289	-0.50639	-0.71546	0.039839	0.63896	0.18	1.4999	-0.34621	-0.27066	-0.03294	-1.5922	-0.10397	0.86527	0.56936	0.61734	-1.1367	0.40656	0.64847	-0.70777	-0.87559	1.1213	-3.2013	1.6622	-1.2885	0.5047	-0.025486	1.0788	1.0573	0.54645	-1.0532	-1.3757	1.3954
Goniatites deceptus	Korn & Titus (2011, text-fig. 48F)	-0.6171	-1.0702	0.022661	0.3557	-0.31979	-0.65958	0.98007	-0.34597	0.74264	-0.063748	-0.45789	1.3774	1.0716	-0.67595	0.16779	0.040912	0.023577	-0.056411	-0.97517	-1.5954	0.19829	0.22848	0.44105	-0.92599	0.99288	-1.1707	-0.16657	-0.059996	-0.70809	0.82379	0.12378	-0.38879	-0.1369	-0.35801	1.4058	1.064	-1.3128	0.55977	-1.0623	0.16189	1.2425	-1.454	0.20892	-0.091913	-0.36279	0.91778	2.6589	0.36538
Goniatites eganensis	Korn & Titus (2011, text-fig. 54C)	-1.1202	0.27765	0.4812	-0.73087	0.19522	-1.0449	-0.31251	1.7297	1.8959	-1.4278	0.5352	-0.20235	0.44561	-0.59425	-1.2146	-0.46107	2.2105	-0.53375	0.87374	-0.78231	1.1579	-0.24889	-0.65957	-1.7746	-0.92108	0.074128	1.7352	0.88849	2.2118	-1.2848	-0.097676	-0.76782	-0.026085	0.39911	2.118	-0.26726	1.1084	0.4728	-1.314	1.2693	0.43875	0.091972	0.0076878	0.91598	0.13975	-0.94748	-0.53724	0.14501
Goniatites eganensis	Korn & Titus (2011, text-fig. 54D)	-1.1331	-0.52137	0.90727	-0.29325	-1.1128	-0.022961	-0.7289	-0.39335	-1.4105	-0.86009	0.50468	0.075792	-0.64821	0.037492	0.061927	1.0654	-0.96694	1.3054	-0.58947	-0.41443	-0.59579	-0.7035	-0.38212	-0.73035	-0.07599	0.22815	-0.86229	0.25526	0.197	-1.4314	1.0912	-0.5832	-1.676	-1.8089	-0.12404	0.69391	0.2424	0.36592	-0.68513	0.1954	-0.94385	1.0882	0.27215	1.126	-0.62541	0.17259	1.5909	-1.8688
Hibernicoceras artilobatum	Korn & Ebbighausen (2008, text-fig. 44E)	-0.58751	-1.388	0.10599	-0.15159	-0.44101	-0.42385	1.8772	-0.55063	0.58986	-0.24395	-0.45212	1.9175	1.3412	-0.59997	0.70584	-0.081264	0.5182	-0.4647	-0.36705	-1.5265	-1.0492	0.68184	0.051958	-0.61508	0.72591	-1.0646	-0.02992	-2.1422	-0.60295	0.93399	-0.52377	1.5192	-1.2644	0.30853	1.6762	-1.467	-0.51898	-0.10655	0.53915	0.94087	-1.7392	1.7944	0.40851	-0.54728	0.87537	-0.48674	-0.25729	-0.20053
Hibernicoceras carraunense	Korn & Ebbighausen (2008, text-fig. 40F)	0.09716	-0.56992	-1.2065	0.27304	-1.3229	-0.18629	-0.28263	-0.71329	0.64495	1.3167	1.2405	0.40804	0.78803	-1.1151	-1.0941	-0.010973	-1.1642	0.045921	-0.35759	-0.14628	-0.60618	0.057936	1.0337	-1.3535	-0.11755	0.093485	1.0969	0.14359	0.22591	0.49046	0.38978	1.7677	-1.4209	0.3674	-0.74422	1.4349	0.58949	-1.6523	0.76813	-0.029111	-0.38862	-1.2353	-1.9461	0.093537	-0.84446	0.37698	-1.7363	-1.103
Hibernicoceras touissitense	Korn & Ebbighausen (2008, text-fig. 42F)	-0.27696	0.66497	-0.84057	1.5288	-0.40103	0.14688	-0.59658	-0.40405	-0.83952	-0.72641	-0.93107	0.82679	-0.83191	0.11153	-0.099027	0.045366	0.76685	-2.9748	-1.0147	-0.27472	-0.32345	1.1169	0.39952	0.031508	-0.7871	1.857	0.95728	1.3474	0.13743	0.14366	0.50396	2.4769	1.6848	-0.65089	0.23844	-1.4235	-1.2197	-0.38721	0.66402	0.62652	0.83726	-0.22917	-1.7075	1.8704	-0.31262	0.42658	0.30245	-0.092259
Hypergoniatites exiguus	Ruzhencev & Bogoslovskaya (1971, text-fig. 38d)	-0.78348	-0.75052	0.22247	0.77964	1.532	-0.87462	-0.084268	0.396	0.33074	0.086299	-0.58784	0.019797	-0.10884	-0.629	-0.22616	0.52231	-0.22713	0.35914	0.019397	-0.86236	0.7553	-0.50084	1.2085	-0.31627	0.48658	-0.56276	0.40188	2.6856	-2.32	1.1566	0.33122	0.97977	0.38675	0.26749	-1.1763	1.7055	2.1077	1.2723	0.13391	0.8387	-0.50414	0.70531	0.34875	-0.19019	-0.87115	-0.71076	-0.83159	3.0156
Hypergoniatites fusiger	Klug et al. (2006, text-fig. 30D)	-0.47814	-1.507	0.092193	-0.82486	1.6735	0.033283	2.007	-0.41408	-0.34273	-0.43794	0.29737	0.91737	-0.18428	0.16653	0.76222	-0.86798	1.0556	0.82905	0.014301	0.49168	-0.25183	0.41521	-0.63831	2.8569	1.5201	2.4187	0.42263	-0.55837	0.89414	-0.0008199	2.6361	0.40353	-0.45342	-0.41819	-0.36594	0.57078	0.64044	0.87988	-1.6451	-1.2516	-0.10499	-0.41466	-2.0036	0.35468	0.20597	-0.53355	-0.12589	0.78472
Hypergoniatites tenuiliratus	Ruzhencev & Bogoslovskaya (1971, text-fig. 37v)	-0.58656	-1.2415	0.2372	2.0656	2.8249	0.50002	0.24113	0.44525	-1.5721	0.39431	-0.94105	1.0519	2.162	0.10291	-0.94987	0.21216	0.44369	1.3577	0.50005	1.5513	0.11944	-0.61732	-0.99059	-1.1283	-2.1602	1.5476	0.074915	0.47545	-0.89459	0.40724	-0.53272	-0.50348	-0.13477	-0.25449	0.85114	-0.12874	0.048143	-1.9082	0.48788	-0.5025	0.20107	0.080058	-0.089152	-1.7527	0.52311	0.64307	0.09551	-1.0183
Lusitanoceras zirari	Korn & Ebbighausen (2008, text-fig. 50F)	1.5688	-2.329	-0.61882	-0.37253	-0.039722	3.2759	0.11832	0.084521	0.41471	-1.7862	-2.6368	-1.0708	-0.3839	-0.036883	-0.86941	1.0666	0.61946	-0.5686	-1.814	2.0667	1.2651	1.0492	-0.21958	-0.46639	-0.014114	-2.0741	0.35048	-0.86621	0.37146	-0.77984	0.8719	-0.020265	-0.28193	0.27683	-0.41378	0.39059	0.82202	-0.44957	-0.064099	0.46945	-0.42467	0.10229	-0.027688	0.24742	-0.51832	-0.060042	-0.16271	0.12265
Neogoniatites canovasi	Korn & Feist (2007, text-fig. 19)	-0.28741	0.46473	-0.8668	-1.5835	-1.5319	-0.39438	0.79458	0.76825	0.38031	-0.64397	0.16991	0.070048	0.40977	0.89016	-1.1242	-0.29397	-1.5384	0.41099	0.18395	2.3177	0.14294	0.20267	-0.45114	-0.3607	-0.25239	0.97147	-1.9369	0.079688	-0.1065	1.3288	-0.6996	0.44447	2.1662	-0.78649	1.1825	-0.39711	1.3992	0.48817	-0.097702	1.3244	-0.05373	0.45724	-1.6611	-0.52206	1.6702	0.14763	1.7777	0.54149
Neogoniatites latus	Ruzhencev & Bogoslovskaya (1971, text-fig. 36g)	1.9082	-0.7868	0.99179	0.24672	0.076119	0.11993	-1.4957	1.227	2.3945	-1.2762	0.94279	-0.36455	-0.68799	-0.10862	1.1224	2.3281	-0.0944	1.2943	0.056256	-1.3019	-1.4262	2.0607	-0.037178	0.62322	-2.5721	1.4862	-0.28893	-1.1025	-1.911	1.2828	0.14707	-0.67892	0.059144	0.19357	-0.14002	-0.28007	-0.47391	0.59759	-0.10099	0.1791	0.58419	-0.71078	-0.28267	0.31039	0.3411	-0.32307	-0.12318	0.012518
Neogoniatites milleri	Ruzhencev & Bogoslovskaya (1971, text-fig. 36v)	1.8585	-0.88735	-0.14402	-1.0658	0.30748	0.26426	-2.9391	2.1071	-0.045621	-0.12936	-0.41009	0.63424	1.5823	-2.5169	2.7017	-1.7358	-1.0782	-0.92227	-0.92498	1.0945	-1.2581	-1.9308	0.34827	-0.03131	1.3716	0.39861	0.093049	0.91815	0.6557	0.18381	-0.21846	-0.36214	0.3361	-0.072226	0.40116	-0.26953	-0.48415	0.43918	-0.13013	-0.49639	0.01579	0.53907	-0.039924	-0.31722	0.008906	-0.058356	0.10971	-0.04944
Neogoniatites ruginosus	Ruzhencev & Bogoslovskaya (1971, text-fig. 36a)	0.92754	0.13455	-0.64837	0.11618	0.76868	-0.13971	-2.1522	-1.2217	-0.6202	0.14106	1.2478	-0.10314	1.706	1.0608	-0.9826	-0.66262	0.46385	-0.055008	0.36339	-0.98715	0.2709	-0.35293	-2.014	-0.99692	-0.19547	-0.68659	-0.22212	-2.0624	1.2104	2.3845	1.0011	0.41622	1.4087	-1.4511	-1.0717	0.99723	0.89903	0.96906	0.76859	-0.34714	-1.505	0.035263	0.59857	1.8531	-0.51371	-0.62822	0.31717	0.011946
Neogoniatites worki	Klug et al. (2006, text-fig. 33B)	0.99002	-0.80057	-2.224	-2.3089	0.67901	0.13896	-0.45395	1.1146	-1.3602	2.4381	-1.6057	-0.083361	-2.8321	1.5557	-0.07815	0.68844	1.4134	0.68742	-0.044598	-2.4663	-0.26626	-0.78154	0.71872	-0.71411	-0.12562	0.66215	-1.0596	0.25845	0.75502	0.60898	-0.20117	0.17963	0.42055	-0.01382	1.4937	0.67164	-0.34457	-0.56678	-0.21463	-0.035183	-0.024422	0.62515	0.09351	-0.80643	-0.29253	-0.1534	-0.28107	-0.37269
Paraglyphioceras celeris	Korn & Ebbighausen (2008, text-fig. 48D)	0.16398	-0.25137	-1.4411	0.25668	-0.82294	-0.45006	-0.43146	-0.59493	0.81037	1.117	0.44726	0.52207	0.60546	0.35737	-0.88365	0.28291	-1.2904	0.55095	0.5455	0.86896	-0.34369	0.45151	-0.31893	-0.7168	-0.57008	0.035943	0.33965	-0.19816	0.90342	-0.74398	2.6012	0.19497	-0.41619	0.68361	0.73951	-0.79412	-0.29878	0.51023	-0.717	-1.4526	3.4744	0.21394	1.5267	-1.1699	-1.9025	-0.85604	0.24922	0.639
Paraglyphioceras rudis	Korn & Ebbighausen (2008, text-fig. 46G)	-0.15416	0.66238	-1.2207	0.26643	-0.48998	-0.48216	-0.71108	-1.2949	0.6364	-1.1046	-1.7704	0.27869	0.23264	1.5396	-0.6853	-0.90598	0.0039157	-0.97643	0.22484	0.43606	-0.85445	-0.86714	0.31055	-0.054678	-0.079639	0.79894	-1.0752	-1.2919	-1.6759	-0.9777	-2.0586	-0.55618	-1.3709	0.69275	1.1477	-0.037767	0.060093	1.3875	-0.91818	-2.723	-0.66364	-0.40371	-0.13253	1.264	-0.90684	0.58272	-1.3814	1.2811
Platygoniatites molaris	Ruzhencev & Bogoslovskaya (1971, text-fig. 41g)	1.9558	0.58882	2.2957	0.034638	-0.46287	-0.80236	0.63286	-0.71172	-0.42426	1.0576	-0.52618	0.89712	-0.27977	0.033354	-0.31247	-0.1777	0.23815	0.013445	-0.87812	0.97559	1.8423	0.64835	0.57764	-1.6087	-0.82115	1.584	-0.90613	0.0053353	1.8263	0.10624	-0.71513	0.50848	-1.3162	1.2399	-1.6953	-0.20948	-1.3055	2.6118	0.84459	0.15095	-0.50188	1.0348	-0.056892	-1.2253	-0.060571	-1.0538	0.48414	0.9215
Platygoniatites nudus	Ruzhencev & Bogoslovskaya (1971, text-fig. 41d)	1.4332	0.42484	1.3776	0.34478	-0.61356	-0.28902	0.73035	-0.5284	-0.98579	0.43709	1.7036	-0.42686	0.071136	0.53043	-0.70478	0.84624	0.99482	-1.1571	-2.4015	-0.64693	0.13472	-0.28077	-1.6256	-0.12742	0.65275	-1.4702	0.36363	1.8673	-0.6313	1.5687	0.2626	-2.0829	0.86634	0.55759	0.39503	-1.6942	-0.2404	-0.60401	-1.8106	-1.9752	-0.49201	0.1773	-1.1123	-0.90505	-0.25639	0.57172	-0.55335	0.032247
Platygoniatites omniliratus	Ruzhencev & Bogoslovskaya (1971, text-fig. 39v)	1.9971	0.13756	1.6682	-0.12936	-0.062513	-0.7396	-1.449	-0.088954	0.10929	0.77335	0.40522	0.47183	-0.13927	-0.24185	-0.60144	-1.8924	0.76199	-0.79813	0.93082	-0.40999	1.6337	1.4532	-1.3885	1.1557	0.3842	-0.39163	-2.7811	0.63523	-1.5569	-1.8115	0.45534	1.6481	-1.3598	-0.022354	0.86404	0.87823	0.88829	-2.2055	-0.48882	0.44405	0.4601	-0.33906	0.3088	0.26659	0.6815	0.47053	0.15777	-0.11031
Platygoniatites rhanemensis	Klug et al. (2006, text-fig. 41F)	1.239	-1.6725	0.64321	1.3885	-0.48586	2.9767	1.0272	0.087975	0.66991	-1.2786	1.7787	-1.7471	0.35804	1.884	-0.37974	-0.626	-1.2506	-0.14927	2.4536	-1.7404	0.42061	-1.0474	0.85825	-0.41642	1.7536	1.0187	-0.017542	1.2549	0.80705	-0.089459	-1.0853	1.0594	0.029695	-0.22061	0.44611	-0.24505	-0.65991	0.27914	0.28675	-0.58952	0.16443	0.13658	0.12344	-0.66984	0.20003	0.24163	0.25755	-0.0383
Platygoniatites superior	Ruzhencev & Bogoslovskaya (1971, text-fig. 42v)	2.1039	0.06015	2.4724	0.0015127	-1.1683	-0.48511	0.72997	0.30993	-0.36848	0.32773	-1.424	2.6117	-1.251	0.42572	-1.444	-0.85078	-0.58284	0.54024	2.0139	0.45042	-0.64136	-1.4791	1.7937	0.95058	-0.67442	-1.1301	2.5238	-0.79092	-0.23686	0.13289	0.45027	-0.95504	1.2417	-1.2339	0.031932	0.012292	0.30555	-0.33289	-0.11241	0.23733	-0.13205	-0.44744	0.089109	0.83649	-0.13085	0.35551	-0.38439	-0.45317
Progoniatites maghribensis	Korn et al. (2003, text-fig. 32B)	0.21226	-1.7276	-0.7837	-1.0429	-0.50356	0.87942	1.7338	-1.2039	-0.48442	1.2083	0.73633	-0.25476	0.40296	-0.56305	0.61912	-1.0847	1.8231	-1.2298	1.2226	0.23089	-1.7758	-1.2745	-1.4745	0.39149	-1.7686	0.11343	-0.38181	0.85092	-0.86853	-0.33428	-0.49666	-0.93529	0.076973	1.4861	-1.8227	-0.75288	0.17768	0.71258	0.75832	1.6544	1.0494	-0.26759	1.6338	1.576	0.070126	0.25628	0.36072	0.032623
[truncated: 7 more columns]

## Sheet: values EL
Var-covar	Eigenvalue	% variance
1	0.0442493	46.828
2	0.0265898	28.139
3	0.0120526	12.755
4	0.00526214	5.5688
5	0.0019946	2.1108
6	0.00120629	1.2766
7	0.000676021	0.71541
8	0.000510179	0.53991
9	0.000354361	0.37501
10	0.000260623	0.27581
11	0.000225229	0.23835
12	0.000198783	0.21037
13	0.000151112	0.15992
14	0.000126807	0.1342
15	0.000101083	0.10697
16	7.49108e-05	0.079276
17	6.92924e-05	0.07333
18	5.94114e-05	0.062874
19	5.29899e-05	0.056078
20	4.16015e-05	0.044026
21	3.81841e-05	0.040409
22	2.74471e-05	0.029047
23	2.59504e-05	0.027463
24	2.31858e-05	0.024537
25	1.88528e-05	0.019951
26	1.56363e-05	0.016547
27	1.26155e-05	0.013351
28	1.12238e-05	0.011878
29	1.02314e-05	0.010828
30	8.94676e-06	0.0094681
31	6.65548e-06	0.0070433
32	6.37104e-06	0.0067423
33	4.59984e-06	0.0048679
34	3.70178e-06	0.0039175
35	3.15386e-06	0.0033376
36	2.89556e-06	0.0030643
37	2.36391e-06	0.0025017
38	2.2169e-06	0.0023461
39	2.12371e-06	0.0022475
40	1.74465e-06	0.0018463
41	1.59904e-06	0.0016922
42	1.19463e-06	0.0012642
43	1.16456e-06	0.0012324
44	8.03142e-07	0.00084994
45	7.41954e-07	0.00078519
46	5.95331e-07	0.00063002
47	5.18416e-07	0.00054863
48	4.09376e-07	0.00043323
49	3.59873e-07	0.00038084
50	3.21261e-07	0.00033998
51	2.05642e-07	0.00021763
52	1.81534e-07	0.00019211
53	1.32583e-07	0.00014031
54	1.05512e-07	0.00011166
55	4.34735e-33	4.6007e-30
56	1.05352e-55	1.1149e-52

## Sheet: Fourier coeff VL saddle
species	source	coeff1	coeff2	coeff3	coeff4	coeff5	coeff6	coeff7	coeff8	coeff9	coeff10	coeff11	coeff12	coeff13	coeff14	coeff15	coeff16	coeff17	coeff18	coeff19	coeff20	coeff21	coeff22	coeff23	coeff24	coeff25	coeff26	coeff27	coeff28	coeff29	coeff30	coeff31	coeff32	coeff33	coeff34	coeff35	coeff36	coeff37	coeff38	coeff39	coeff40	coeff41	coeff42	coeff43	coeff44	coeff45	coeff46	coeff47	coeff48
Arnsbergites arnsbergensis	Korn (1988, text-fig. 48B)	-0.638594	-0.362651	0.621923	-0.762661	0.130502	-0.0574708	-0.026741	-0.162472	-0.0665158	0.0786995	0.00335746	-0.0103245	0.0109673	0.0264341	-0.0460882	0.0362495	-0.0328093	-0.00844222	-0.00359129	0.00295559	0.0150427	-0.0163627	0.000950075	0.00736237	0.00572453	0.000845261	0.0184184	-0.00704667	0.00545628	0.00301321	0.000666382	0.00274691	-0.0101199	0.00737501	-0.00161294	-0.00596241	-0.00184076	-0.00437294	-0.00705848	-0.0003564	0.000861786	-8.31792e-05	0.000276804	-0.00271254	0.00511076	-0.00128514	0.000371201	0.00496234
Arnsbergites ferrus	Korn & Ebbighausen (2008, text-fig. 31G)	-0.634878	-0.368915	0.630786	-0.754861	0.163273	-0.0547378	-0.0122657	-0.15971	-0.0548976	0.0538106	-0.000539151	-0.0170021	0.00737925	0.0372043	-0.0588132	0.0339447	-0.0223023	-0.00201332	-0.00237692	0.00391765	0.00982814	-0.0196696	3.28255e-05	0.0057463	-0.00445966	0.00272918	0.0198606	2.71341e-05	0.00526173	0.00293782	0.00277755	0.00444559	-0.00883842	0.00274861	0.000493581	-0.00678158	5.42082e-05	-0.00684806	-0.0066224	-0.00355098	-1.85608e-05	-0.000285453	-0.000253589	-0.00350955	0.00594045	-0.000880437	-0.00165423	0.00531215
Arnsbergites gracilis	Korn (1988, text-fig. 45C)	-0.706609	-0.327768	0.54919	-0.81288	0.169215	-0.070213	-0.0365106	-0.167214	-0.040928	0.0524196	-0.00557549	-0.0211758	0.0199253	0.0412143	-0.0433058	0.0555763	-0.0245428	0.00469158	8.0107e-05	0.00753494	0.00199128	-0.0202159	0.00140631	0.00668323	-0.000759963	-0.00636276	0.0178512	-0.0131705	0.00597969	-0.0020271	0.00232178	0.00111637	-0.00270641	0.0100359	-0.00279999	-0.00371612	-0.00265357	-0.00121992	-0.0073213	0.00336673	-0.00215254	0.000573346	-0.0026719	-0.002082	0.00259169	-0.00488747	0.00344618	0.00297891
Arnsbergites proiecturus	Korn & Ebbighausen (2008, text-fig. 35C)	-0.678293	-0.460515	0.622336	-0.774337	0.14783	-0.00813077	0.0105134	-0.174447	-0.0740659	0.0488251	-9.02033e-05	0.00345572	0.0054532	0.0529867	-0.0568867	0.0243515	-0.0148561	-0.0233634	1.68112e-05	0.00228952	0.0150946	-0.00999435	-0.00188231	-0.00326126	0.00201199	-0.000435777	0.0170449	0.00793846	0.00346317	0.00785293	-0.00217762	0.000671302	-0.0127148	-0.00406453	-0.000432804	-0.000896202	0.000414641	1.49484e-05	-0.00342935	-0.00529106	0.00161998	-0.00278726	0.00448102	1.77052e-05	0.00282069	0.00416434	-0.00184392	0.00146033
Arnsbergites robustus	Korn & Ebbighausen (2008, text-fig. 26B)	-0.69899	-0.369844	0.621135	-0.738143	0.174471	-0.0534654	-0.0364726	-0.175026	-0.0258541	0.0473149	0.0122633	-0.0383858	0.0145847	0.041409	-0.0547567	0.0337057	-0.028445	0.0107061	-0.00420527	0.0131849	0.00349197	-0.0195961	-0.0078928	0.0100517	-0.00239215	-0.00530149	0.0177409	-0.00312915	0.0135108	-0.00230324	0.00718266	0.0021821	-0.00417362	0.00594984	0.00440071	-0.00638821	-0.00358756	0.000140001	-0.0081452	-0.000270243	-0.00492781	0.00140669	-0.00337014	-0.00435848	0.00415588	-0.00284024	-0.00261586	0.00292306
Arnsbergites rufus	Korn & Ebbighausen (2008, text-fig. 38B)	-0.603306	-0.312841	0.582833	-0.800821	0.197977	-0.0532663	-0.0110436	-0.168692	-0.0508295	0.0570383	-0.0151354	-0.0143936	0.00897448	0.0246657	-0.0579273	0.0446635	-0.0283608	-0.0109429	-0.0045639	0.00627276	0.0136582	-0.0185644	0.00506421	0.0121978	0.00621912	-0.00252501	0.0246774	-0.00362244	-0.00142685	-0.00358869	0.000765095	0.000478709	-0.0134699	0.00885401	-0.00321253	-0.00639513	0.000514153	-0.00389192	-0.00601354	-0.00231347	0.00150057	0.00136682	-0.000419109	-0.0029418	0.00434946	0.000701704	0.000279984	0.00675811
Arnsbergites sphaericostriatus	Korn & Ebbighausen (2008, text-fig. 28D)	-0.485276	-0.282153	0.557014	-0.829344	0.11332	-0.0637234	-0.0438532	-0.0969486	-0.0229918	0.0916865	-0.0253035	-0.0148112	-0.00323098	0.0102041	-0.0356179	0.0504878	-0.00277225	-0.00189428	-0.00434065	-0.00367762	0.00155027	-0.0202485	0.0184978	0.00574977	0.0123449	0.00648539	0.00650772	-0.00640837	-0.00732595	0.00179571	0.00221394	-0.000687318	-0.00257808	0.00180498	-0.0110221	-0.00286352	-0.00414668	-0.00110644	1.91707e-05	-0.00126012	0.00676377	-0.00218915	0.000429674	0.00407623	-0.000804389	0.00305854	0.00340204	0.00126431
Arnsbergites warslowensis	Korn & Ebbighausen (2008, text-fig. 26C)	-0.630593	-0.309224	0.537201	-0.83588	0.169242	-0.113187	-0.0771732	-0.16316	-0.0155345	0.0784145	-0.0126785	-0.0188594	0.0352033	0.0285694	-0.0341793	0.0601109	-0.0203157	0.0115372	0.00227018	0.00881822	-0.00685678	-0.0239976	0.00445286	0.00772606	0.00218383	-0.00109842	0.0123758	-0.0169642	0.00483019	-0.00771982	0.00364053	-0.00213407	0.000381991	0.0139407	-0.00587204	-0.00258297	-0.00311614	0.00152532	-0.00420577	0.00619744	0.000287711	0.000755402	-0.0038856	-0.000457881	-0.000927597	-0.00632093	0.00451648	0.00150437
Revilloceras bellornatum	Klug et al. (2006, text-fig. 37B)	-0.460065	-0.573845	0.80765	-0.587464	0.213133	0.0862657	0.0931291	-0.160969	-0.0643383	-0.0141026	0.00435662	-0.0171166	-0.0397603	0.0175819	-0.0628918	-0.0467362	0.011989	-0.0301811	-0.0147136	0.00468916	0.0203939	0.0105086	-0.0037778	0.00246126	-0.00024984	-0.00302396	-0.0158751	0.0195303	-0.010082	0.00749269	-0.00276552	0.00384702	0.0134785	-0.00343489	0.00643982	0.00563278	0.0011048	0.000456267	0.0117192	0.00176117	-0.00150475	-0.00108914	-0.00123831	0.000196502	-0.00630033	-0.00349591	0.00264456	-0.00350044
Dombarites carinatus	Ruzhencev & Bogoslovskaya (1971, text-fig. 46a)	-0.309119	-0.666812	0.921342	-0.386719	0.201013	0.119059	0.115493	-0.108564	-0.025036	-0.0414627	0.0124077	-0.0116993	-0.0364262	-0.00953392	-0.0157851	-0.0829864	0.0100918	-0.0124036	-0.0124139	-0.00874494	-0.00810711	0.0265623	-0.00785015	-0.00173511	0.00769166	0.00174512	-0.0216764	-0.00344818	-0.00270483	-0.00857254	-0.000246354	-0.00371011	0.00326591	0.0077041	-0.0084851	0.00502178	-0.00323663	0.00184335	-0.00397646	0.0107108	0.00386432	0.00145634	0.000600402	-0.00067913	0.00621934	-0.00474704	0.00304744	0.00489662
Revilloceras granofalcatum	Klug et al. (2006, text-fig. 35F)	-0.473415	-0.51441	0.78306	-0.617503	0.215883	0.00572344	0.0283678	-0.154164	-0.0515156	0.00617365	0.0112402	-0.0212386	-0.0255069	0.0133986	-0.0764746	-0.0156666	-0.014299	-0.0206731	-0.00929779	0.00966935	0.0271258	-0.00419999	-0.00655808	0.00769161	-0.00566189	-0.00168316	0.0063233	0.0208178	-0.00187235	0.00912192	-0.00269139	0.00551682	-0.000594016	-0.00745362	0.00991057	0.00039258	0.0088469	-0.000562396	0.00589006	-0.00825913	-0.00177846	-0.00179956	0.00188727	-0.000581266	-0.00289293	0.00536829	-0.00520243	-0.00437467
Dombarites falcatoides	Ruzhencev & Bogoslovskaya (1971, text-fig. 44d)	-0.605655	-0.387645	0.68849	-0.693139	0.202919	-0.00411383	0.049684	-0.156376	-0.0692213	0.0200962	4.4027e-05	-0.0249197	-0.0103491	0.0294802	-0.0737907	0.00947798	-0.0171471	-0.0273401	-0.00371298	0.000610132	0.0103259	-0.0133616	-0.00764491	0.00680959	-0.00854262	0.00626279	0.0140149	0.0215303	0.00311169	0.00639801	0.00332932	0.0065712	-0.0087333	-0.00999856	0.00833496	-0.00592893	0.00248935	-0.0035359	0.00180973	-0.00739203	-0.00075728	0.000866859	0.00424009	-0.00223843	0.000816214	0.00446372	-0.00662432	-0.00120388
Dombarites linteroides	Ruzhencev & Bogoslovskaya (1971, text-fig. 51b)	-0.46317	-0.533819	0.835484	-0.529328	0.219856	0.0119793	0.0577369	-0.145997	-0.0528265	-0.0135625	0.0191659	-0.0203921	-0.0252246	0.0144822	-0.0689852	-0.0363276	-0.00597105	-0.0212013	-0.012551	0.00249172	0.0288471	0.00818617	-0.0104534	0.00133741	6.81005e-05	-0.00417438	-0.0058065	0.0199413	-0.00650654	0.0086371	-0.00745654	0.00336284	0.00208668	-0.00678153	0.00684676	0.0073624	0.00470359	0.00187038	0.00934318	-0.00178488	-0.000692135	-0.0028952	0.00268278	0.00348346	-0.00556196	0.00219179	0.00101946	-0.00518748
Dombarites liratostriatus	Ruzhencev & Bogoslovskaya (1971, text-fig. 50v)	-0.523202	-0.489448	0.715066	-0.697479	0.205272	-0.033897	0.000364958	-0.15925	-0.054461	0.0206493	0.00550749	-0.0150525	-0.0237051	0.0195704	-0.0756317	0.0118622	-0.0272061	-0.0105005	-0.00315296	0.0174973	0.0249596	-0.015262	0.0049703	0.0094263	-0.00685068	-0.00237449	0.0193314	0.0116355	0.00268825	0.00935378	0.000496784	0.00300253	-0.00644526	-0.00481484	0.00644131	-0.00696282	0.00409725	-0.00483159	-0.0027805	-0.0109502	-0.00440745	0.000805283	4.64427e-05	-0.000824674	0.00207333	0.0073948	-0.0057177	0.00371928
Dombarites liratus	Ruzhencev & Bogoslovskaya (1971, text-fig. 50b)	-0.464642	-0.627073	0.80405	-0.59456	0.244385	0.0411029	0.0542503	-0.16597	-0.0344216	-0.0191801	0.00662402	-0.0150377	-0.0413835	0.0198238	-0.0774178	-0.0359705	-0.00620447	-0.021361	-0.0189049	0.0138192	0.0269911	0.00862359	-0.00147853	0.00609028	0.00709827	-0.00636597	-0.00360712	0.0238652	-0.00966826	0.00593079	-0.00204772	0.00257536	0.00345437	-0.0062811	0.00582112	0.0034498	0.00313109	0.00204957	0.0122648	-0.00520585	0.0023247	-0.00106294	-0.000445079	-0.000342571	-0.00719704	0.000263257	-0.00151439	-0.00420955
Dombarites parafalcatoides	Ruzhencev & Bogoslovskaya (1971, text-fig. 49v)	-0.565902	-0.587035	0.753064	-0.653875	0.22744	0.0109993	0.0509397	-0.179745	-0.0486171	-0.00987331	0.00225349	-0.0138928	-0.0311111	0.0419602	-0.0791036	-0.0100042	-0.00798222	-0.0242641	-0.0107037	0.0150012	0.0187641	-0.00611449	-0.000250829	0.000233837	0.00125741	-0.00361167	0.00549642	0.0255438	-0.00241741	0.0123758	0.00377705	0.00470414	-0.000538485	-0.0107405	0.00535719	-0.00171693	-0.000235102	-0.00215374	0.00634536	-0.0101046	0.00213703	-0.00149963	0.000479737	0.000576469	-0.00458271	0.00507256	-0.00253908	-0.0023738
Dombarites paratectus	Ruzhencev & Bogoslovskaya (1971, text-fig. 48g)	-0.41875	-0.562174	0.812601	-0.582544	0.237445	0.0500826	0.0683285	-0.149675	-0.0525364	-0.0173547	0.00146147	-0.0174059	-0.0311053	0.00991712	-0.0708856	-0.0440216	-0.000136516	-0.0252485	-0.0163478	0.00781908	0.0250582	0.0170443	-0.00646614	0.00905766	0.00405138	-0.00534343	-0.00771645	0.0206997	-0.00853281	0.00153406	-0.00333778	-5.78197e-05	0.0067949	-0.00573314	0.00692873	0.00761347	0.00470833	0.00346043	0.012302	-0.000487157	-0.00198915	-0.00299379	-0.00179657	-0.00219908	-0.00919881	0.00177119	0.00125698	-0.00620291
Dombarites semiliratus	Ruzhencev & Bogoslovskaya (1971, text-fig. 51v)	-0.549373	-0.567654	0.760056	-0.644345	0.211346	0.0281923	0.0606296	-0.160455	-0.0466686	-0.0122573	0.00563932	-0.0108602	-0.0283287	0.0205102	-0.0782643	-0.0216513	-0.00676273	-0.025474	-0.013739	0.0133646	0.0240549	0.00126142	0.000855396	0.0038495	-0.00308732	-0.00431039	0.000674371	0.023553	-0.00737755	0.0122738	0.000754244	0.00570013	0.0041207	-0.0108504	0.00926659	0.000472062	0.00232689	-0.00242065	0.00875811	-0.00890351	-0.000471851	0.0002247	-0.00128076	0.000906616	-0.00615054	0.00591172	-0.0018448	-0.00391156
Dombarites tectus	Ruzhencev & Bogoslovskaya (1971, text-fig. 48b)	-0.56852	-0.494797	0.672678	-0.739508	0.238679	-0.0526621	-0.00632946	-0.171021	-0.0375792	0.0154919	-0.00663	-0.0173972	-0.00691895	0.0379246	-0.0821426	0.0244	-0.023309	-0.00900347	-0.00109543	0.0205837	0.0187469	-0.0226111	0.00546143	0.00529017	-0.00731935	-0.00785286	0.0198506	0.0110463	0.00897814	0.00864758	0.00272824	0.00505703	-0.00647025	-0.00690404	0.00350744	-0.00841226	-0.000417301	-0.00201595	-0.0101297	-0.00968577	0.00129932	0.00175461	0.000618296	0.000575881	0.00758393	0.00449838	-0.00372303	0.00342605
Goniatites americanus	Korn & Titus (2011, text-fig. 43J)	-0.548008	-0.480312	0.702241	-0.708995	0.180798	-0.0196258	0.0173452	-0.142563	-0.0543094	0.00895994	-0.00494169	-0.00753008	-0.0160763	0.0185668	-0.0768074	0.00506155	-0.0139875	-0.00475897	-0.00296939	0.00948127	0.0313365	0.00119195	0.00430601	0.00981733	0.0006863	-0.0015681	0.0156822	0.012141	-0.000388392	0.000592564	-0.00307344	-0.00149704	-0.00899842	-0.00704322	0.00419822	-0.006976	0.00529067	0.00116377	-0.00133062	-0.00604152	-0.00073107	0.0013257	0.000439771	0.00191449	0.000297522	0.00349151	-0.00667055	0.00144561
Goniatites crenistria	Korn & Ebbighausen (2008, text-fig. 18C)	-0.666462	-0.38586	0.546223	-0.835071	0.17005	-0.0975315	-0.045024	-0.153002	-0.0530593	0.0314955	-0.00378415	-0.000369271	0.00271788	0.0329764	-0.0413247	0.0630584	-0.0229952	0.00622201	0.0109991	0.00804091	0.010616	-0.0207265	0.00672819	-0.00303734	0.00382476	-0.00221084	0.0154981	-0.0180129	0.00675715	-0.000187975	-0.00405933	-0.000164602	-0.00615861	0.0111066	-0.00792177	-0.000382547	-0.00173887	-0.00186324	-0.00698294	0.00698184	0.000497837	-0.000426577	0.00237085	-0.000994689	0.00424844	-0.00566813	0.00573581	0.00181363
Goniatites evelinae	Klug et al. (2006, text-fig. 26D)	-0.485482	-0.195343	0.532948	-0.838789	0.123125	-0.139351	-0.0438282	-0.110986	-0.032248	0.0843544	-0.0329174	-0.00758917	-0.00216626	0.000210611	-0.0247845	0.061012	-0.0101237	0.00352964	-0.00626934	0.00190539	-0.00220471	-0.0177908	0.0231721	0.00148249	0.0136988	0.00219152	0.00674913	-0.0121836	-0.0074101	0.00458793	0.00230731	-0.00340562	-0.000861659	0.00377895	-0.0127961	0.00145089	-0.00440944	0.000180407	-0.00266683	-0.000395699	0.00558105	-0.00518177	0.00141847	0.00456482	0.00300993	0.00238463	0.00498746	-0.000482901
Goniatites sphaericus	Korn (1988, text-fig. 38E)	-0.691526	-0.368059	0.590621	-0.783489	0.163405	-0.0950951	-0.035687	-0.182967	-0.0514554	0.0493968	-0.000928022	-0.00705597	0.0217522	0.0311294	-0.0463181	0.0468563	-0.0318844	0.00275882	-0.000478004	0.013887	0.00966936	-0.0184072	0.00140596	0.00451492	-0.0012727	-0.00484089	0.0206545	-0.0105527	0.00968851	-0.000987743	0.00159531	-0.00166806	-0.00730211	0.00976845	-0.00157856	-0.00338031	-0.000690262	-0.00124654	-0.00977606	0.00203846	-0.00378107	0.000847143	-0.00163927	-0.00125918	0.00574767	-0.004226	0.00215881	0.00307555
Goniatites gerberi	Klug et al. (2006, text-fig. 24F)	-0.581748	-0.176924	0.421241	-0.900496	0.100985	-0.148638	-0.0690289	-0.0989545	-0.0140516	0.0782974	-0.0289407	0.000420648	0.0124203	0.0114709	0.00741681	0.0683822	-0.00478144	0.00981372	-0.00377096	0.000954281	-0.0110467	-0.0149215	0.0144268	-0.0125227	0.00827709	-0.00383652	-0.00717917	-0.0137086	0.00229454	0.00443945	0.000834652	-0.0024062	0.00288079	0.00371411	-0.00435884	0.0121676	-0.00363389	0.00454066	0.000846243	0.00181101	-0.00336558	-0.00436182	0.00325016	-0.00020916	0.00186516	-0.00198996	-0.000690891	-0.00629852
Goniatites globostriatus	Korn & Ebbighausen (2008, text-fig. 25)	-0.685892	-0.384219	0.523483	-0.850432	0.141794	-0.0985936	-0.0687958	-0.144256	-0.0323894	0.0518895	-0.000968081	-0.00231402	0.0200004	0.0315033	-0.029736	0.0648346	-0.0219718	0.00779396	0.0107594	0.00445309	-0.0065668	-0.0208563	0.00474869	-0.002005	-0.00278964	0.00157494	0.0114131	-0.0195851	0.00610533	-0.00215403	8.9566e-05	0.000677206	4.47598e-05	0.010285	-0.00631329	5.06108e-05	-0.00228265	-0.00161185	-0.00425167	0.00798699	-0.000239848	-7.07183e-05	-0.000460008	-0.00196503	-0.000746879	-0.00485508	0.0048964	-0.000105797
Goniatites hudsoni	Korn & Tilsley (2006, text-fig. 24C)	-0.631524	-0.275719	0.531404	-0.834515	0.156663	-0.101864	-0.0485246	-0.143338	-0.0256176	0.0599501	-0.0158048	-0.0137495	0.0224857	0.0200872	-0.0397012	0.0616436	-0.0088489	0.00803944	-0.00222377	0.00488431	0.00460834	-0.0237874	0.00800708	0.00450309	0.00563728	0.0021088	0.0118984	-0.015549	0.00181712	-0.000351153	0.00368461	0.000937667	-0.00129496	0.0101595	-0.00854027	-0.00234591	-0.00548422	-0.00240124	-0.00402388	0.003973	0.00200314	-0.00187078	-0.00266586	-0.000534315	0.00100669	-0.0029775	0.00634493	0.00166769
Goniatites lazarus	Korn et al. (2005, text-fig. 3.6)	-0.601272	-0.279883	0.485463	-0.871915	0.116314	-0.0976953	-0.0635304	-0.114361	-0.00922084	0.0793196	-0.0155113	0.000446215	0.0196066	0.0129898	-0.0258561	0.0619042	-0.00394456	0.0122928	-0.000364142	-0.00220084	-0.00264752	-0.0219898	0.0124496	-0.00438391	0.00449133	0.00630605	0.00414492	-0.0151912	-0.00247522	0.00287928	0.00244658	0.00241979	0.00147776	0.0086608	-0.00980311	0.00297559	-0.00403214	-0.00136289	-0.000157644	0.00216426	0.00453251	-0.00444989	-0.000278804	-0.000664679	-9.57478e-05	-0.000686877	0.00513236	-0.00218511
Goniatites moorei	Korn & Tilsley (2006, text-fig. 26F)	-0.667573	-0.209613	0.509462	-0.828344	0.132879	-0.113276	-0.0611581	-0.127848	-0.0125763	0.0513105	-0.015871	-0.0332838	0.013949	0.0110824	-0.0222235	0.0663757	-0.0107603	0.0133795	-0.0042021	0.00847094	-0.0102743	-0.0161551	0.0100494	0.00888089	0.0108478	-0.00146005	0.00559825	-0.0174788	0.00115485	-0.00425793	0.0066274	-0.00699894	0.00495933	0.00784424	-0.00875933	-0.000109308	-0.00643821	0.00507455	-0.00222603	0.00479466	0.000759028	-0.0014656	-0.0038109	0.00499712	-0.00208248	-0.00257083	0.00422019	-0.00202698
Goniatites rodioni	Klug et al. (2006, text-fig. 21F)	-0.477866	-0.253013	0.525226	-0.849889	0.146198	-0.104588	-0.0479402	-0.0924528	-0.0142656	0.0597171	-0.0359093	-0.010557	-0.00478561	0.00645126	-0.031193	0.0625611	-0.00130593	0.00128436	-0.00351436	0.000397111	-0.000805523	-0.0184167	0.0233886	0.00104225	0.0101158	0.00296193	0.00621409	-0.00997571	-0.00732237	0.00514637	0.00146954	-0.00337676	-0.00152622	0.00282536	-0.0131613	0.00100493	-0.00285898	7.99085e-05	-0.00123716	-0.00118298	0.00391825	-0.00329291	0.00227084	0.00492592	0.00166002	0.0036	0.00471339	-0.000198732
Goniatites spirifer	Korn (1990, text-fig. 12B)	-0.59297	-0.398922	0.610095	-0.789496	0.160889	-0.0495738	-0.0134518	-0.154187	-0.0769227	0.0489647	-0.0105831	0.00136454	-0.000386791	0.0274772	-0.054337	0.0431998	-0.024168	-0.0211677	0.00528446	0.00393591	0.0123864	-0.0131309	0.00725339	0.00623485	0.00136217	0.00607396	0.0231214	-0.0029466	0.000363654	0.00322009	-0.0023717	-0.00117862	-0.0122979	0.000963458	-0.0037231	-0.00785773	0.00215776	-0.00470394	-0.0068932	-0.00135631	0.0021958	0.00101227	0.0014817	0.000813604	0.00335642	0.00135685	-0.00018756	0.00700708
Goniatites stenumbilicatus	Klug et al. (2006, text-fig. 28B)	-0.525284	-0.443367	0.696479	-0.714384	0.215364	-0.0183955	0.0140615	-0.160207	-0.0584264	0.0228458	-0.00378359	-0.0201061	-0.0204362	0.0309209	-0.0764702	0.010448	-0.0187443	-0.00613247	-0.00225817	0.00909477	0.025976	-0.00378062	0.00177248	0.00707617	-8.25174e-05	0.00650425	0.0169717	0.0107086	0.00377567	0.00870441	-0.000674617	0.00028276	-0.00668406	-0.00583267	0.00509377	-0.00883851	0.00327489	-0.00467124	-0.00389428	-0.0083989	-0.00189687	0.00214617	9.7317e-05	0.00121405	0.00174092	0.00436102	-0.0060905	0.00288315
Goniatites deceptus	Korn & Titus (2011, text-fig. 48E)	-0.560742	-0.207654	0.488707	-0.864439	0.151092	-0.126956	-0.0474437	-0.137251	-0.0335149	0.0862288	-0.0290128	-0.00824707	0.0186065	0.0215423	-0.0247662	0.0688246	-0.00646095	0.000947196	-0.0027589	0.00068963	-0.00712684	-0.0255065	0.0137561	0.00151641	0.0101414	0.00135386	0.00766537	-0.0161346	-0.00317474	0.00133792	0.00281757	-0.000406498	0.00127839	0.00796693	-0.0106098	0.00238606	-0.00618927	-9.80483e-05	-0.00207927	0.00329208	0.00462429	-0.00649842	-0.000650727	0.000966512	-0.00107756	-0.0010509	0.00609483	-0.00173342
Goniatites deceptus	Korn & Titus (2011, text-fig. 48F)	-0.678747	-0.207592	0.436628	-0.885335	0.117895	-0.13358	-0.0794644	-0.140498	-0.0112793	0.0826354	-0.0161376	-0.00662106	0.0371381	0.0132328	-0.00525001	0.0693598	-0.00956264	0.0132571	0.000224245	0.00276274	-0.0130615	-0.0167905	0.00708527	0.00136692	0.00396026	-0.00442368	-0.0023895	-0.0213092	-0.00289443	-0.0026216	0.00271012	-0.000536909	0.0093703	0.00752413	-0.00408834	0.00493206	-0.00385226	0.00392301	0.00200492	0.005869	0.00090317	-0.00270483	-0.00191018	0.00136247	-0.00512584	-0.00151068	0.00175437	-0.00544559
Goniatites eganensis	Korn & Titus (2011, text-fig. 54C)	-0.508674	-0.385542	0.671911	-0.736829	0.167258	-0.0382589	-0.00295683	-0.136182	-0.0737915	0.0461817	-0.005554	-0.0232592	-0.0177306	0.0290519	-0.0662557	0.0269609	-0.00447738	-0.00156497	0.00151738	0.000509716	0.0219461	-0.0158478	0.00386709	0.00986397	-0.00288019	0.00912706	0.0162424	0.00231331	-0.00312415	0.00017366	-0.00126304	0.00347927	-0.00463024	-0.00175082	0.000518436	-0.00999243	0.0042522	-0.00909032	-0.00347327	-0.00239238	-3.38339e-05	0.00582794	-0.000437767	-0.000297194	-0.00038514	0.00161148	-0.00240439	0.00616052
Goniatites eganensis	Korn & Titus (2011, text-fig. 54D)	-0.685201	-0.261758	0.551458	-0.796064	0.172099	-0.0755176	-0.0259847	-0.170029	-0.0360907	0.0643986	-0.00971504	-0.0246651	0.0283398	0.0297539	-0.043091	0.0512484	-0.0243289	0.00349201	-0.00917001	0.00521721	0.00438255	-0.0173817	0.000834091	0.0123706	0.00397765	-0.00256541	0.0181499	-0.0115461	0.00523392	-0.00194792	0.00574311	0.00240476	-0.00313632	0.00944739	-0.00197368	-0.00626806	-0.00506147	-0.00167864	-0.00687227	0.00190165	-0.000439619	0.00018173	-0.00444102	-0.00295259	0.00137239	-0.00359492	0.0021886	0.00371723
Hibernicoceras artilobatum	Korn & Ebbighausen (2008, text-fig. 44E)	-0.606833	-0.257155	0.521048	-0.843244	0.137487	-0.102784	-0.050542	-0.13784	-0.0323917	0.0831588	-0.0172471	-0.0102566	0.0206775	0.0229029	-0.0312571	0.0608229	-0.0113546	0.00649802	-0.002644	0.00132282	-0.00101419	-0.028006	0.0107296	0.00290719	0.00289145	-0.000580255	0.00855873	-0.0144431	-0.00194576	-0.000232741	0.00427407	0.00273789	-0.00101589	0.0104991	-0.00840917	-0.000422214	-0.00522906	-5.85828e-06	-0.00171451	0.00260109	0.00479453	-0.00282512	-0.00161766	-0.00151941	-1.21721e-05	-0.002693	0.00487441	-0.000445164
Hibernicoceras carraunense	Korn & Ebbighausen (2008, text-fig. 40F)	-0.551988	-0.41761	0.599348	-0.800475	0.142415	-0.0198738	-0.0160568	-0.131142	-0.0513107	0.0571335	-0.0139178	0.000531496	0.000308753	0.0278382	-0.0603298	0.032864	-0.00467827	-0.00841851	0.00662143	-0.0010527	0.0168503	-0.0161026	0.00779086	0.0050641	-0.000368798	0.00841868	0.0154434	0.000782292	-0.000889813	-0.00163904	-0.00481336	0.000945577	-0.00984181	0.000509683	-0.00342134	-0.00850952	0.00349242	-0.00310173	-0.00237903	0.000336123	0.00267738	0.0046019	0.00257636	0.00105834	0.00137629	-0.000149572	-0.00132439	0.00505457
Hibernicoceras touissitense	Korn & Ebbighausen (2008, text-fig. 42F)	-0.633469	-0.430591	0.594301	-0.802816	0.158768	-0.0508177	-0.0225255	-0.152715	-0.0485796	0.0478595	-0.00624672	-0.00430408	0.0111538	0.0447531	-0.0580343	0.0425654	-0.0111277	-0.00374543	0.00505075	0.00319025	0.0110621	-0.0175685	0.00360922	-0.000631451	-0.0014931	0.00453701	0.0189357	-0.00363606	0.00454188	0.00353797	-0.00142362	0.00181511	-0.0110045	0.00329769	-0.00397162	-0.00572137	-0.000665739	-0.00183303	-0.00686608	-9.03286e-05	0.00286735	0.00103153	0.0032433	-0.00126236	0.0049332	-0.00150475	0.000607728	0.0043674
Hypergoniatites exiguus	Ruzhencev & Bogoslovskaya (1971, text-fig. 38d)	-0.583986	-0.504671	0.696344	-0.714001	0.185008	-0.0291089	0.00543891	-0.174785	-0.0487936	0.0270722	-0.00114669	0.000860419	-0.00185123	0.0288237	-0.0692841	0.00792286	-0.026554	-0.012517	-0.00826202	0.01175	0.0236704	0.00151949	0.00324827	0.00380625	0.00285356	-0.00049726	0.0193301	0.0117462	0.00462243	0.00781025	0.000349985	-0.0020954	-0.00944681	-0.0070261	0.000629722	-0.00528516	0.00295825	-0.0006254	-0.003545	-0.00935216	-0.000269965	-0.00227734	0.000175872	0.00185859	0.00144244	0.00618422	-0.00395984	0.00278464
Hypergoniatites fusiger	Klug et al. (2006, text-fig. 30D)	-0.451542	-0.285345	0.438743	-0.896029	0.140905	-0.15167	-0.0803216	-0.106716	-0.0129036	0.0830839	-0.021671	0.0229615	0.00111905	-0.00032119	-0.0148672	0.0678701	-0.0143897	0.0102494	0.00683668	-0.00349005	-0.00411391	-0.0216314	0.0165167	-0.0112098	0.0141923	0.00395121	-0.000629682	-0.0167415	-0.00316012	0.00183873	-0.00332324	0.00433702	0.00158772	0.00556331	-0.0102577	0.00798193	-0.00692226	-0.00114418	0.002877	0.00260552	0.00546561	-0.00595314	0.00397046	-0.00140325	7.55692e-06	0.000635221	0.00379324	-0.00479943
Hypergoniatites tenuiliratus	Ruzhencev & Bogoslovskaya (1971, text-fig. 37v)	-0.434367	-0.599131	0.761589	-0.642988	0.196484	-0.0102345	0.0109086	-0.170303	-0.062697	0.01697	-0.0112281	0.0029752	-0.0158378	0.0299562	-0.0690782	-0.0104267	-0.0123336	-0.022771	-0.0067623	0.0113547	0.0218595	0.0137018	0.00275414	0.00648488	0.00378966	0.00175904	0.0110307	0.0189476	-0.00255384	0.0050105	0.00154663	-0.00504794	-0.00235857	-0.0136643	0.00411194	-0.00443663	0.00106559	0.00199341	0.0026214	-0.00800179	0.000275922	4.40813e-05	-0.00280653	0.00295012	-0.00531438	0.00470783	-0.00471596	-0.00147263
Lusitanoceras zirari	Korn & Ebbighausen (2008, text-fig. 50F)	-0.673275	-0.66254	0.717174	-0.693175	0.191473	0.00316503	0.0183494	-0.207331	-0.0405079	0.00146751	0.00818966	0.00764823	-0.0175356	0.0488154	-0.0633808	0.00784649	-0.0194095	-0.0381338	-0.0143974	0.0239118	0.00528273	-0.00958096	0.000279021	-0.000422619	0.0110316	-0.0075709	0.0155503	0.0211878	0.00165505	0.0109199	0.0115351	0.00147186	-0.00532059	-0.00981375	-2.24489e-05	-0.00186175	-0.00934731	-0.00099118	0.000150661	-0.0100753	0.00661889	-0.00104724	-0.00149523	-0.00118813	-0.000366683	0.00416319	0.000516946	-0.000298789
Neogoniatites canovasi	Korn & Feist (2007, text-fig. 19)	-0.473078	-0.359358	0.718878	-0.685281	0.173405	-0.00147604	0.0261657	-0.131367	-0.0704367	0.0286206	-0.00911919	-0.0181792	-0.00551063	-0.0045256	-0.0703172	-0.00394991	-0.0115844	-0.00907662	-0.00344947	0.000313456	0.0222134	0.00746778	-0.00139594	0.0168421	-0.0115719	0.00963802	0.0112133	0.0134892	-0.000741901	-0.00324436	-0.000158945	0.000934804	-0.0032395	-0.005496	0.0104432	-0.00775553	0.0066558	0.00126299	0.00105534	-0.00383357	-0.00539939	0.00383987	-0.000725239	-0.00234145	-0.0002729	-0.0013412	-0.00734367	-0.00153853
Neogoniatites latus	Ruzhencev & Bogoslovskaya (1971, text-fig. 36g)	-0.63125	-0.506208	0.641151	-0.7669	0.180683	-0.0979405	-0.0494828	-0.17603	-0.0567705	0.0358092	0.00152698	-0.000586006	0.00596185	0.0531871	-0.0495825	0.0442236	-0.0312653	0.00238947	0.0106542	0.0136504	0.0099565	-0.0160375	0.00428112	-0.00151986	-0.000609485	-0.0102962	0.0217203	-0.00933849	0.00949671	0.00196354	-0.00411285	-0.00263248	-0.00785431	0.00597846	-0.00425655	-0.00108767	-0.000274677	0.000773361	-0.0109002	0.00162315	-0.00293244	-0.00151758	0.00265642	0.000905716	0.00655128	-0.00226181	0.00288414	0.00259169
Neogoniatites milleri	Ruzhencev & Bogoslovskaya (1971, text-fig. 36v)	-0.555508	-0.571442	0.669396	-0.738275	0.205614	-0.0168156	-0.00256043	-0.194523	-0.0646818	0.0316323	-0.0103254	0.00297081	-0.0191613	0.0629084	-0.0644208	0.016306	-0.019357	-0.0195586	0.00357893	0.01635	0.0135045	-0.00940268	0.00816493	-0.00209237	0.00316803	-0.00346327	0.0192033	0.0124739	0.00229665	0.00948737	0.000701524	-0.00603442	-0.0104636	-0.00622495	-0.00380476	-0.00496972	-0.0011509	0.00136834	-0.00320589	-0.00837724	0.00216168	-0.00152726	-2.40074e-05	0.00390991	0.00212119	0.00709415	-0.000726667	0.00298211
Neogoniatites ruginosus	Ruzhencev & Bogoslovskaya (1971, text-fig. 36a)	-0.579463	-0.525282	0.674313	-0.738431	0.221742	-0.028288	0.00196254	-0.176044	-0.0411989	0.00514452	-0.00530507	0.000388416	-0.0179349	0.0314704	-0.0749282	0.0166261	-0.0307036	-0.011057	-0.00310374	0.0202174	0.0198787	-0.00357284	0.00947422	0.00374944	0.000510658	-0.0051871	0.0229626	0.0111862	0.00269619	0.00769385	0.00221248	-0.00328781	-0.01101	-0.00780068	-0.000171519	-0.00643171	0.000548674	0.000252306	-0.00513597	-0.0097782	0.000966716	-0.00259249	-0.000492828	0.00248221	0.00263983	0.00721383	-0.00374496	0.00381532
Neogoniatites worki	Klug et al. (2006, text-fig. 33B)	-0.623563	-0.272829	0.515963	-0.847664	0.207666	-0.154545	-0.057271	-0.155198	-0.0333398	0.030487	-0.0225176	-0.0126827	0.0131834	0.0168762	-0.0329054	0.0774402	-0.0234041	0.0103155	0.00554989	0.0117262	-0.00499216	-0.0239173	0.0111139	0.00615451	0.00335385	-0.00220279	0.0134155	-0.0207484	0.00348816	-0.00527529	0.00320368	-0.00302076	0.000163968	0.0114498	-0.00951597	-0.00160603	-0.00560624	0.00158149	-0.0042007	0.00830747	0.000679058	-0.000470288	-0.00193445	0.000881266	-0.00193459	-0.0048874	0.00714113	0.000278869
Paraglyphioceras celeris	Korn & Ebbighausen (2008, text-fig. 48D)	-0.501291	-0.428468	0.709351	-0.701016	0.137936	-0.0660141	-0.00388372	-0.140707	-0.077711	0.061159	-0.00591187	-0.00728327	0.00808488	0.0157476	-0.0603882	0.0167399	-0.0197577	-0.0140824	-0.00113931	-0.000770246	0.0210676	-0.00444288	0.00258928	0.0128359	-0.000898557	0.00700355	0.0174158	0.00540211	-0.00215661	-0.001059	-0.00233811	0.00206781	-0.00937886	-0.00138398	0.00391254	-0.00924148	0.00506775	-0.00457932	-0.00214209	-0.0040715	-0.000329923	0.00524699	0.000487742	-0.000729858	0.00182722	0.00149477	-0.00525422	0.00353922
Paraglyphioceras rudis	Korn & Ebbighausen (2008, text-fig. 46G)	-0.537093	-0.558221	0.744898	-0.665655	0.159163	0.0344903	0.0589034	-0.135859	-0.0578152	-0.0163068	-0.0129882	-0.00189557	-0.0227791	0.0183992	-0.0724617	-0.023109	0.00567534	-0.0133159	-0.00320308	0.0100935	0.0196145	0.0134824	0.00200918	0.00826674	-0.0022926	-0.00173451	-4.52698e-05	0.0205608	-0.00194357	-0.000482401	0.00152543	-0.00387634	0.00404131	-0.0115614	0.00752324	-0.00147945	-0.000203003	0.00388938	0.00447831	-0.00384327	-0.00268666	-8.42553e-05	-0.00420457	0.00170936	-0.00366044	0.00054811	-0.00183539	-0.00436978
Platygoniatites molaris	Ruzhencev & Bogoslovskaya (1971, text-fig. 41g)	-0.281849	-0.848685	0.877998	-0.416231	0.134764	0.185546	0.155336	-0.12232	-0.00645708	-0.0164063	-0.0155646	-0.0225142	-0.0708951	-0.0261167	0.000162111	-0.078726	0.0108808	0.00364663	-0.0112406	-0.0130828	-0.00237186	-0.00221603	-0.00560424	0.0176573	-0.000169335	-0.00398941	-0.0203224	-0.0112022	0.0109169	-0.00979481	-0.0118567	0.00178674	0.000788585	0.00957205	-0.000678646	0.00853338	0.00327816	0.00574756	-0.00771299	0.00533904	0.00206135	-0.00413711	0.00216878	0.00234377	0.00387917	0.00499715	0.00426306	0.00126772
Platygoniatites nudus	Ruzhencev & Bogoslovskaya (1971, text-fig. 41d)	-0.634297	-0.409754	0.57454	-0.817233	0.208035	-0.119834	-0.0757036	-0.171537	-0.0148229	0.0483694	-0.0166254	-0.0124218	0.0388796	0.0356037	-0.0481581	0.0572377	-0.0317669	0.00964872	0.00254346	0.00898521	-0.00334744	-0.00626845	0.00408384	0.00607191	0.00142598	-0.00147991	0.0233224	-0.0187017	0.0039062	-0.0053995	0.0011896	-0.00425786	-0.00525688	0.0134065	-0.00443094	-0.00350598	-0.000269104	0.0010587	-0.00897164	0.00595877	-0.00214146	-0.000533352	-0.00160144	-0.000605525	0.000330824	-0.00585086	0.00403146	0.004302
Platygoniatites omniliratus	Ruzhencev & Bogoslovskaya (1971, text-fig. 39v)	-0.600277	-0.638992	0.665302	-0.732727	0.21245	-0.0213562	-0.0218684	-0.190842	-0.0330918	0.0191422	-0.0163028	0.00752307	-0.00712895	0.0709613	-0.0700583	0.0169105	-0.0188177	-0.0127502	0.00406809	0.013962	-0.00320136	-0.00253459	0.0111725	-0.00820782	-0.00402602	-0.00102048	0.0263731	0.0116593	-0.00345515	0.0068706	0.00689711	-0.00597432	-0.0123606	-0.0071559	-0.00370383	-0.00226319	-0.00289675	-0.000144723	-0.00480317	-0.00781541	0.00362264	-0.00415836	-0.00118352	0.00372845	0.00196838	0.00423036	-0.000640966	0.00286909
Platygoniatites rhanemensis	Klug et al. (2006, text-fig. 41F)	-0.626116	-0.507953	0.620145	-0.784301	0.216581	-0.0938963	-0.043915	-0.171336	-0.0445853	0.0119787	-0.0125493	0.00676071	0.0103384	0.0359689	-0.0581405	0.0592026	-0.0310603	-0.0220973	0.00812964	0.0199863	0.00457543	-0.0189439	0.00369693	0.0081248	0.00588639	-0.0113907	0.0289197	-0.00310971	0.00552363	-0.00252291	-0.00224832	-0.00399605	-0.0115349	0.00754871	-0.00476823	-0.00128558	0.00183939	0.00069552	-0.0106111	-0.000580939	-0.000966866	-0.00291022	0.000862775	0.00073755	0.00727166	-0.000562304	0.00146024	0.0050187
Platygoniatites superior	Ruzhencev & Bogoslovskaya (1971, text-fig. 42v)	-0.50409	-0.611689	0.682011	-0.71505	0.21686	0.0177677	0.00600178	-0.165001	-0.0508246	0.0325901	-0.0389789	0.00463061	-0.00442434	0.0788275	-0.0826483	-0.00661981	0.00679334	-0.00727229	0.00170258	0.00378076	0.00368281	0.0150196	0.0118762	-0.00638341	-0.0104448	0.0142045	0.0139677	0.0149473	-0.00572357	0.011421	0.00565478	-0.00899979	-0.00509716	-0.0131515	0.0022573	-0.0086658	-0.00646697	0.00596605	0.0016396	-0.0063295	0.00116676	0.00643876	-0.00302495	0.00603825	-0.00297034	0.00270378	-0.0034022	0.000673954
Progoniatites maghribensis	Korn et al. (2003, text-fig. 32B)	-0.498198	-0.303629	0.626642	-0.773466	0.165981	-0.0968581	-0.0342789	-0.134046	-0.0394925	0.0697302	-0.0186282	-0.0209271	0.00609822	0.0115866	-0.0525947	0.0444027	-0.0170135	0.00447463	-0.00697911	0.00150039	0.012315	-0.0181917	0.0119424	0.0136778	0.00665547	0.00504188	0.0164679	-0.00685329	-0.00469927	-0.00162808	0.00421338	0.00263698	-0.00506572	0.00491058	-0.00650697	-0.00900258	-0.00405555	-0.00626685	-0.00362946	-0.00153985	0.00550661	0.00286029	-0.00307166	-1.22186e-05	0.00102472	0.00101413	0.00283989	0.00555174
[truncated: 72 more columns]

## Sheet: PCA VLS
species	source	PC1	PC2	PC3	PC4	PC5	PC6	PC7	PC8	PC9	PC10	PC11	PC12	PC13	PC14	PC15	PC16	PC17	PC18	PC19	PC20	PC21	PC22	PC23	PC24	PC25	PC26	PC27	PC28	PC29	PC30	PC31	PC32	PC33	PC34	PC35	PC36	PC37	PC38	PC39	PC40	PC41	PC42	PC43	PC44	PC45	PC46	PC47	PC48
Arnsbergites arnsbergensis	Korn (1988, text-fig. 48B)	-0.38596	0.33121	-0.93311	0.84159	0.6642	-2.3063	0.19762	0.03111	0.96486	-0.84173	0.77322	-0.13085	-0.62041	0.51074	0.93656	0.56659	-0.18063	0.36333	1.1048	0.49608	-1.708	0.24112	-1.2675	0.0097324	-1.3437	1.267	0.89048	0.67327	1.0473	0.60591	-1.419	1.44	-1.6174	0.24051	0.18748	0.80347	-0.061454	0.13309	0.57027	1.7016	0.79762	0.56388	-1.5006	0.42008	0.78479	0.097334	1.4673	-0.3475
Arnsbergites ferrus	Korn & Ebbighausen (2008, text-fig. 31G)	-0.28919	0.3871	-1.0914	0.33798	0.37466	-0.88565	0.51725	-0.15627	0.039424	-0.14083	-0.74119	-0.9408	0.27064	0.013383	-0.69603	0.83794	0.28557	-0.81728	1.2079	-0.2263	-0.86427	0.63316	1.231	0.40526	-0.085148	-1.2544	-0.96005	0.32108	0.6376	0.64508	0.035185	1.2995	0.41936	1.2705	2.0781	-0.75636	2.2035	0.38512	1.41	-0.42734	1.3995	0.59828	-2.5626	-0.48968	0.79282	-0.98425	-1.0235	0.65254
Arnsbergites gracilis	Korn (1988, text-fig. 45C)	-0.80282	0.94252	-0.91852	0.98591	-0.15237	0.53129	0.95788	-0.37938	-0.026447	0.53559	0.22847	-0.33243	-0.090441	-0.47457	0.62084	-0.061589	-0.62152	0.40612	0.75561	-0.086993	-0.22296	0.46198	-0.2598	-1.3439	-0.27989	0.78984	-0.94529	-1.9542	0.30853	-1.9276	0.41006	-0.30708	0.41307	0.020733	-0.5646	0.57426	1.3533	-0.23872	-1.0399	-2.4116	-1.6447	0.15581	-0.40482	-0.38233	0.90392	-1.1141	0.71578	0.10811
Arnsbergites proiecturus	Korn & Ebbighausen (2008, text-fig. 35C)	-0.079053	1.3205	-0.34777	1.3223	2.1781	-0.26251	-0.26418	0.31295	1.6403	0.24873	-0.031881	-0.45891	-0.21306	0.85969	-0.035919	0.28387	-1.4886	-0.096571	-2.1141	0.15613	0.96378	-1.4724	0.40781	-0.098639	-0.99404	0.027615	-0.75625	0.77858	0.62175	-0.21204	0.2712	-0.34553	-0.84408	-0.57939	-1.7619	-0.98546	-0.62659	-0.55074	0.60316	-1.606	1.3725	1.316	1.5609	1.091	0.9472	0.81191	0.61723	-1.4262
Arnsbergites robustus	Korn & Ebbighausen (2008, text-fig. 26B)	-0.36229	0.99564	-1.6192	0.99989	-1.1224	-0.45151	1.3329	0.63563	-1.6527	-1.0713	0.066687	-1.5912	0.88631	-0.30234	1.1848	-0.58989	-0.15207	-0.61221	2.284	-0.98862	-0.0089752	-1.4055	0.65915	0.7882	0.1326	-0.16308	0.69304	-0.96111	-0.8753	0.40311	0.93693	-0.54779	0.29816	-0.38347	0.29595	-0.97695	-1.0382	-0.75819	0.018136	2.2837	0.42005	1.3787	1.5066	-0.51133	0.078712	1.5306	-0.4665	-1.8786
Arnsbergites rufus	Korn & Ebbighausen (2008, text-fig. 38B)	-0.56724	-0.039302	-0.84572	-0.49086	0.70822	0.91964	1.9688	-1.7014	1.0975	-0.2372	0.71874	1.118	-0.25374	1.5491	0.44191	0.46755	-0.74999	0.6909	1.4284	0.30227	0.092159	0.56546	1.1606	0.012249	1.3892	0.56238	-0.40155	0.49457	1.558	0.96963	1.0088	1.3003	-0.1676	-1.9878	0.25297	-0.51782	-1.3541	0.86661	-1.1363	-0.45842	1.7812	-1.4783	1.3245	-0.71868	-0.31951	0.48594	0.3565	1.3227
Arnsbergites sphaericostriatus	Korn & Ebbighausen (2008, text-fig. 28D)	-0.72546	-1.6484	0.78805	0.24317	1.3759	-0.54369	0.5211	0.49496	-1.6933	-1.2878	-0.8956	-0.077096	-2.1064	0.79719	0.68191	-0.85155	-0.86461	0.074421	-0.26327	0.32076	-0.43049	-0.80483	-0.10629	-0.038762	-0.96507	1.6307	0.59738	-0.56721	-0.64876	-0.2248	0.14023	0.095022	1.276	-0.034374	0.62114	2.0925	-0.6253	-0.21154	-0.21907	-0.51947	0.60877	-0.78457	-0.9202	2.8855	-0.16521	-0.37436	0.59006	-0.54256
Arnsbergites warslowensis	Korn & Ebbighausen (2008, text-fig. 26C)	-0.94731	0.18936	0.10693	0.04974	-1.2815	-0.36867	1.6742	0.90619	-0.73322	-0.49881	1.4004	0.6138	-0.75226	-0.4891	-0.39865	-0.92273	0.44214	-1.3336	-1.3265	0.22859	0.88945	-0.95226	0.79262	-0.97759	1.3891	0.9039	2.001	1.1001	-0.66604	0.40212	-0.2657	2.0829	0.11343	0.30075	-0.5987	-1.0321	-0.45255	1.066	0.91688	-1.6974	-0.53214	1.5471	-0.054912	-0.69624	0.63318	-1.4226	-0.8949	-0.71591
Revilloceras bellornatum	Klug et al. (2006, text-fig. 37B)	1.4669	-0.51287	-0.80397	0.31461	0.99732	1.7713	-0.019403	0.44459	1.2783	0.38557	1.5431	0.28474	-2.2893	-1.5517	0.93463	0.062549	0.12521	-2.4028	-0.40266	0.025353	-0.076626	1.6611	-0.17658	1.1497	-0.72933	-1.1657	0.23807	0.23663	-2.3246	-2.7895	0.13809	0.45798	-0.97835	-1.1723	0.74466	-0.12433	0.063167	-0.44317	-0.81319	1.1817	1.0849	0.13764	-0.15229	-0.22238	0.29036	-0.38451	-0.25504	-0.081596
Dombarites carinatus	Ruzhencev & Bogoslovskaya (1971, text-fig. 46a)	2.5193	-2.049	-0.58338	1.5958	-2.5952	-0.33743	0.51272	0.7244	1.0002	2.3707	-1.8296	-0.76043	-0.78101	3.1594	0.77868	0.79009	1.8519	-1.1923	-0.20997	0.048733	1.1526	-0.025264	-0.29012	-0.11026	0.77407	1.207	-0.22375	-0.76227	0.38891	0.1481	-0.16351	-0.1517	-0.38059	0.0043783	-0.1909	-0.02379	-0.0021173	-0.02691	0.18627	-0.081314	0.10725	-0.065894	-0.073112	0.14566	-0.022786	-0.040785	0.20425	-0.14504
Revilloceras granofalcatum	Klug et al. (2006, text-fig. 35F)	1.0164	-0.51451	-0.82154	-1.0935	-0.42502	-0.28019	-0.35611	0.29375	-0.65087	-1.081	0.97223	-1.4766	0.0035402	0.20476	-0.29533	-1.7155	-0.68534	0.26223	-1.4846	-0.69066	-0.882	-0.50193	-1.1442	-1.2837	1.5715	-0.71371	-0.73176	-0.33921	1.4604	-0.41023	-1.7823	0.052627	-1.815	1.3326	-1.2588	-0.74734	0.87591	-1.1865	-1.3635	0.9642	0.29447	-2.0614	-0.01039	0.36167	1.1192	0.75059	-1.4484	-0.49137
Dombarites falcatoides	Ruzhencev & Bogoslovskaya (1971, text-fig. 44d)	0.20326	0.11199	-2.0947	0.0047737	1.1176	1.1287	0.18191	-0.76432	1.033	0.231	-1.5162	-1.1292	1.2167	0.69841	-2.5887	-2.2773	0.20833	0.10418	-0.43499	1.1076	-1.1073	-1.9414	0.80796	0.23795	-0.36668	0.62249	0.48662	0.32425	-1.0935	-0.58593	-0.051434	-0.52077	-0.039057	-0.087395	-0.67008	0.86125	0.79943	0.8391	-0.26246	0.96998	0.8523	-0.64769	-0.19911	-1.3597	-2.3756	-1.491	0.29332	-0.057481
Dombarites linteroides	Ruzhencev & Bogoslovskaya (1971, text-fig. 51b)	1.4038	-0.746	-1.6451	-0.59764	-1.5823	-0.414	-1.1921	1.4461	0.73651	0.0026641	-0.13519	-1.8383	-0.31263	-0.21493	-0.94161	0.77674	-2.1039	2.7576	-0.62831	-1.1264	-0.49457	0.92907	0.67994	-0.35192	-0.82572	-1.2805	2.0509	0.8982	-0.36094	-0.22044	1.0004	1.7537	1.8719	-0.64493	0.49977	0.024933	-1.1961	-0.58745	-0.23536	-1.026	-0.6958	-0.49697	-0.1417	-0.074188	-0.22676	0.49338	0.40114	0.38567
Dombarites liratostriatus	Ruzhencev & Bogoslovskaya (1971, text-fig. 50v)	0.50626	0.022359	-0.15593	-1.2481	-0.11548	-0.65875	-0.36375	-1.1633	-0.99319	-1.1982	0.20951	-1.2407	0.88042	0.10365	0.74458	-0.80842	0.84988	-0.92619	-0.61154	-0.22789	-0.59442	2.1124	-0.89491	-0.35917	-0.25989	0.75809	-0.91655	0.17633	-1.6674	2.2554	1.7186	0.0887	-0.80138	-2.6557	-1.6301	-0.83643	0.87697	-1.8006	1.5997	-1.0964	-0.038421	-0.30943	-0.47675	0.71361	-0.96425	-1.1305	0.40845	0.41027
Dombarites liratus	Ruzhencev & Bogoslovskaya (1971, text-fig. 50b)	1.4924	-0.0046188	0.038701	-0.81364	-0.63661	1.4357	-0.30154	0.54157	-0.5702	-1.2765	1.4006	-0.11784	-1.1534	-0.28397	0.47038	0.59667	-0.39822	1.218	1.3869	1.1982	-0.0077453	-0.6021	-0.39354	1.2753	1.5697	1.6377	-0.90843	1.9411	0.18457	-1.048	-0.18339	-1.0258	-0.6355	1.1544	1.0788	-0.87514	1.4424	0.32174	2.1894	-1.5505	-0.03999	-0.48899	0.4623	0.10241	-1.8646	1.5021	0.75288	-0.51393
Dombarites parafalcatoides	Ruzhencev & Bogoslovskaya (1971, text-fig. 49v)	1.001	0.88248	-0.30544	-0.42316	0.12826	1.269	-0.68916	0.16731	0.2836	-1.2301	-1.0978	-0.48997	-0.23572	-1.2369	-1.2746	0.20679	0.87281	0.20309	0.074046	1.3019	0.70918	-1.1043	0.060197	-0.18248	1.5418	0.19718	-0.24358	-1.2491	0.63696	0.83956	-0.86691	0.70342	-0.071677	-1.1169	1.8578	1.4729	0.77332	-1.4662	-0.2597	0.49621	-0.77704	1.9794	1.3422	1.259	1.5827	-0.16275	1.9784	1.6395
Dombarites paratectus	Ruzhencev & Bogoslovskaya (1971, text-fig. 48g)	1.4458	-0.88452	-0.56927	-0.90448	-0.22486	1.4176	-0.05613	0.6418	0.37024	0.37918	1.9026	0.69847	-1.1892	-0.093277	0.603	-0.15824	-1.4767	-0.33456	0.74952	0.15326	-0.074951	-0.53355	1.6723	-0.41224	-1.9583	-0.15862	-0.35184	0.10389	0.23255	3.5756	0.84211	-1.9606	-0.082247	1.5921	-1.2674	0.962	0.70325	1.0525	-0.46339	0.92925	-1.276	0.86492	0.17899	0.059042	0.66732	-1.2815	-0.21865	0.45177
Dombarites semiliratus	Ruzhencev & Bogoslovskaya (1971, text-fig. 51v)	1.0353	0.46289	-0.57712	0.0059711	0.48777	1.3651	-1.4225	0.26617	-0.51031	-0.89386	0.35466	0.2196	-0.16248	-0.20974	-1.4965	0.49732	0.34221	0.33966	-0.068816	1.1631	-0.83593	1.8113	-1.034	-0.55455	0.80659	1.1465	0.10478	-2.6569	0.6914	0.30748	-1.1492	-0.77693	1.2737	-0.5234	-0.55914	-1.0347	-2.4944	1.8904	0.54214	-0.29808	1.1819	1.2414	-0.87167	-0.33821	0.68574	-0.57332	-1.6493	-0.79162
Dombarites tectus	Ruzhencev & Bogoslovskaya (1971, text-fig. 48b)	0.27668	0.67855	0.21819	-1.5459	-0.54819	0.74753	0.62238	-1.2626	-1.0881	-0.82912	-0.72574	-0.93502	0.96563	0.1036	-1.527	0.36126	-0.51953	-2.5839	0.037079	-1.4677	1.5679	1.4769	-0.45579	0.71052	-1.9022	0.73214	2.1484	0.045921	1.9401	-1.151	0.35697	-0.22743	-1.6908	1.3737	0.12125	1.5891	-0.66748	0.9703	0.24647	-0.85578	-0.29751	0.01465	0.45487	-0.0033229	-0.43559	0.74603	0.57564	0.20149
Goniatites americanus	Korn & Titus (2011, text-fig. 43J)	0.44059	0.074582	-0.28127	-0.38935	0.66282	-0.13853	-1.3533	-0.5158	-1.6632	0.62265	0.075892	0.52807	1.3911	0.31782	0.46459	1.5018	-0.58199	1.2522	-0.38502	-0.18247	1.3699	-0.57947	0.44095	0.43366	0.5004	1.7146	-1.2987	1.1184	-0.80832	-1.4344	1.0567	-0.122	-0.42603	0.71298	-1.0112	0.084835	-1.3751	0.11776	-0.046321	1.3513	-0.12369	0.061724	-2.6481	-1.6351	1.603	-0.69577	1.3123	-0.23427
Goniatites crenistria	Korn & Ebbighausen (2008, text-fig. 18C)	-0.69453	0.93418	0.39361	0.30499	-0.30126	0.25112	-1.3003	-1.6231	0.23846	1.8794	0.43382	-1.152	-0.84657	-0.88448	0.88991	1.2197	0.51937	0.94551	0.38464	0.25503	-0.71159	-0.88045	-1.0927	0.013513	0.16804	-0.013758	0.22345	0.5358	1.7801	0.07193	0.96549	1.3777	-1.8308	-0.69426	-0.092871	1.2553	-0.33418	0.37646	-0.79176	0.34729	-1.1331	0.74073	0.25702	0.89948	-1.6838	-1.0947	-2.9599	-0.52211
Goniatites evelinae	Klug et al. (2006, text-fig. 26D)	-1.0923	-2.0335	0.20588	-0.68025	0.035367	-0.60038	-0.78988	-0.033087	1.0312	-1.1381	-2.0097	1.289	-0.077971	-0.7714	0.55973	1.1534	-0.52398	-0.69415	-0.2176	0.57502	-1.9303	-0.1617	0.071336	1.2606	1.389	-0.16059	0.84646	-0.71107	0.057261	-0.80019	0.65881	1.2306	-0.4405	1.6018	-1.883	-1.688	0.050641	0.041769	0.27876	0.78381	-1.6147	0.66339	1.5399	-0.26347	-0.73512	-1.3992	1.2825	0.12388
Goniatites sphaericus	Korn (1988, text-fig. 38E)	-0.56947	1.0291	-0.85165	0.49051	-0.76964	-1.0402	-0.22468	-0.35914	0.97292	0.11318	0.58706	0.68829	0.96348	-0.50952	0.22291	1.2282	-0.10923	-0.44995	0.32348	-0.73606	-0.57999	1.1312	-0.8993	1.0829	2.3364	-0.61207	1.2855	-0.18191	-1.3809	1.2172	-0.46965	-1.7033	0.35679	0.88233	-0.53124	1.5889	0.65134	0.93451	-1.728	-1.1703	1.2381	-1.8074	0.67771	0.6709	0.96499	-0.5141	1.3577	-1.0002
Goniatites gerberi	Klug et al. (2006, text-fig. 24F)	-1.6347	-1.2425	0.76546	1.0699	-0.076199	1.0034	-1.8337	1.0653	1.0864	-0.035102	-0.424	-1.0419	2.2223	-0.099717	0.828	-0.55181	-1.8682	-1.7924	2.0793	1.9047	1.5055	0.57456	-0.57928	-2.7754	0.71329	-0.65669	-0.00015852	1.754	-0.63561	0.064002	-0.80441	-0.13136	-0.050912	0.20581	0.37726	0.39161	-0.95041	-0.07429	0.50801	0.049601	0.17402	-0.37969	-0.14342	0.52278	-0.24925	-0.11159	-0.43119	0.51921
Goniatites globostriatus	Korn & Ebbighausen (2008, text-fig. 25)	-0.85033	1.0283	0.73406	1.1751	-0.4901	-0.34151	-0.98431	0.027248	-0.98811	1.2325	1.0532	-1.1113	-1.0007	-0.14606	-0.23454	-1.0494	1.461	-0.18928	-0.50493	1.2811	-1.3876	-0.12876	-0.10224	-1.7236	-1.2175	0.079647	0.37337	-0.54093	-0.16318	-0.4519	1.9061	0.1579	-0.061555	1.2382	0.37199	-1.8583	0.27394	1.9149	-0.038625	0.23358	0.3523	-1.4082	1.0816	-0.18115	0.91809	1.2742	1.9036	2.2138
Goniatites hudsoni	Korn & Tilsley (2006, text-fig. 24C)	-0.98995	-0.10159	-0.35506	0.35771	-0.36895	0.46032	0.26759	-0.020291	-0.54186	0.11146	-0.033695	0.52646	-0.72129	-0.25164	-0.88519	1.2689	0.5282	0.64982	-0.67026	-1.7894	0.79057	-0.27632	-1.4148	-0.8357	0.20116	-1.5221	-0.049551	0.58811	-0.85935	0.73643	-1.5113	-0.55831	-0.90166	-1.3141	-1.5308	0.42158	-0.22564	1.0241	1.2499	1.449	-0.25101	1.0819	-0.56659	-0.43471	-0.72243	1.5078	1.409	2.3016
Goniatites lazarus	Korn et al. (2005, text-fig. 3.6)	-1.1487	-0.47497	0.84894	1.14	0.3713	0.34041	-0.4494	0.85576	-1.3096	-0.39179	0.6994	-0.68807	-0.57875	1.1118	-1.0879	1.1516	0.60813	-0.0091873	-0.94117	-0.9613	-0.80216	0.047778	-0.84467	0.1465	-0.020502	-1.0013	-1.5239	0.17402	-0.84707	1.0335	-0.45219	-0.36107	0.1292	0.2594	1.7326	0.072429	-0.63919	1.2208	-1.1875	-0.26343	-0.23436	0.3229	0.48255	-0.19346	-2.6837	-0.65271	0.77055	-1.747
Goniatites moorei	Korn & Tilsley (2006, text-fig. 26F)	-1.257	-0.2949	-1.1099	1.2403	-1.0948	0.74122	-0.70268	0.55465	-1.5385	-0.17536	-1.7132	0.7582	0.099083	-0.68674	2.1795	-1.6486	0.019321	1.7988	-0.46124	-0.22837	0.2262	-0.19868	0.082083	2.1618	-0.88131	0.18421	0.584	0.18276	-0.37232	0.15094	-1.246	-1.1903	-1.8048	-0.29647	0.58412	-0.26712	-0.45427	0.076934	-0.60636	-1.67	0.86229	0.073067	0.14064	-0.4999	0.47938	-0.87361	-1.3049	2.3325
Goniatites rodioni	Klug et al. (2006, text-fig. 21F)	-0.92315	-1.7645	0.99377	-0.61199	0.26745	0.95774	-0.43383	-0.39891	-1.2209	-0.075947	-1.9708	0.19871	-0.99292	0.63808	0.37123	-0.30109	-1.492	-0.1501	0.19801	0.40847	-0.21679	0.41063	-1.0223	-0.13949	0.10851	-1.4493	0.14927	-0.54538	1.408	0.13673	1.6561	-0.48483	0.29818	-1.6019	-0.030162	-0.35504	2.146	0.65085	-0.71109	0.10111	0.42743	0.876	-0.51926	-1.8832	1.1602	1.6173	0.13034	-1.7021
Goniatites spirifer	Korn (1990, text-fig. 12B)	-0.27146	0.23941	0.024162	-0.09333	1.3608	-0.72421	-0.18244	-1.3336	1.2615	1.0853	-0.067156	0.37969	-0.64813	1.0125	0.61771	-1.3724	0.42027	1.0484	-0.039198	0.83128	-0.50213	1.7635	-0.4136	0.23805	-0.6982	-0.42653	1.1925	-0.37718	-0.37191	0.58163	-1.6553	-1.0973	0.41726	1.147	0.65071	0.5543	-0.59499	-1.4863	2.4481	-0.51721	-1.4869	0.3873	1.0647	-2.2947	0.029509	1.1488	-0.3163	-0.7988
Goniatites stenumbilicatus	Klug et al. (2006, text-fig. 28B)	0.35684	-0.17835	-0.53264	-1.2245	0.60704	0.4397	0.78401	-0.85867	-0.49152	0.038963	-0.062743	-0.9822	1.0464	-0.10998	1.3457	0.58071	0.67239	-0.36582	-0.71701	1.4121	1.0214	-1.3935	-1.2149	1.3159	-1.1642	-0.95272	-1.044	0.044884	-1.0268	0.69325	-1.3961	1.9914	1.109	-0.73287	0.64794	0.20081	-0.34433	1.9713	0.34253	-0.070488	-2.2424	-2.3336	0.79318	-0.48128	1.7906	0.019071	-0.10402	-0.98468
Goniatites deceptus	Korn & Titus (2011, text-fig. 48E)	-1.271	-1.0859	0.14773	-0.24422	0.051085	0.6797	0.84368	0.11698	2.0028	-0.38206	-0.54952	0.55895	-0.37402	-0.91238	-0.96656	0.1553	-0.27859	-0.39587	-0.7782	-1.2076	0.12641	-1.1161	-0.36036	0.88568	0.20394	0.11321	-1.2819	-1.7507	-0.63934	0.90079	1.4573	0.22554	-0.35616	1.3843	0.4197	0.04208	-1.351	-0.1506	1.77	-0.06378	0.40185	-1.5132	-1.131	1.0118	0.3822	1.7819	-1.8284	1.0999
Goniatites deceptus	Korn & Titus (2011, text-fig. 48F)	-1.5985	-0.088998	-0.037814	1.5987	-0.67728	0.71536	-0.46197	1.6487	0.47358	-0.45369	1.3889	0.3721	1.2926	0.008021	0.01739	-1.3649	0.47302	0.36601	-1.943	0.22375	1.4804	2.5616	1.1864	2.192	-0.32193	0.64504	-1.0271	-0.087353	2.4971	0.17785	-0.037437	1.0495	1.1123	-0.20955	-0.25162	0.30625	1.1666	-0.12222	0.08477	1.83	-0.56121	-0.39909	0.083585	0.39155	-0.69817	0.019445	0.58577	-0.50297
Goniatites eganensis	Korn & Titus (2011, text-fig. 54C)	0.055403	-0.7581	-0.45244	-0.79117	1.1336	-1.0496	0.36888	-0.69547	-0.68095	0.82829	-0.572	-1.544	-0.79964	-2.0698	0.67354	-0.40118	1.5871	0.69348	0.78936	0.39644	1.9355	1.0586	1.1903	-0.19035	0.39316	-1.3605	-1.8479	-0.54747	0.04014	0.20629	-0.048911	0.79608	0.43996	2.4322	-1.4468	0.50371	-1.1738	-0.58041	-1.034	-0.97126	1.3391	1.0556	0.22726	0.093849	-1.3291	0.54185	0.80021	-0.21186
Goniatites eganensis	Korn & Titus (2011, text-fig. 54D)	-0.90451	0.33256	-1.6843	0.77586	-0.3066	0.60934	1.7426	-0.065902	0.70303	-0.34766	0.24477	0.91387	0.72712	0.22346	-0.17144	0.90045	-0.11517	1.2161	1.1044	-0.52131	0.50043	0.22092	-0.92527	-1.4028	-0.95773	0.025081	-0.5793	-1.1905	-0.7053	-1.7077	0.12658	-0.49546	0.55757	-0.039434	-0.86744	-0.5823	1.3361	0.047051	0.65288	0.19346	-1.7628	0.053891	-0.30295	1.6438	-0.89308	0.29113	-0.60473	-0.38499
Hibernicoceras artilobatum	Korn & Ebbighausen (2008, text-fig. 44E)	-1.0688	-0.46514	-0.12945	0.4908	0.14418	-0.14038	0.55035	0.40407	0.31837	-0.52344	0.070629	-0.0053597	-0.75906	-0.53088	-0.92804	0.61437	0.33287	-0.50271	-0.81192	-1.5387	-0.5316	0.10338	-0.17936	-1.5473	0.39981	1.6722	-1.4881	1.1451	0.11515	0.17864	0.82368	-0.69088	-0.30453	0.2008	1.8856	1.1249	-0.77642	-2.299	-0.51304	0.0081081	-0.8595	-0.50104	1.1008	-2.9093	0.99596	-0.85786	-0.29113	-0.18284
Hibernicoceras carraunense	Korn & Ebbighausen (2008, text-fig. 40F)	-0.1996	-0.146	0.79176	0.4086	2.0638	-0.25851	0.38164	-0.38288	-1.2399	0.98234	0.94815	-0.53007	-0.93732	0.91599	-0.38315	-0.40111	-0.018714	1.01	0.073171	-0.29759	1.6987	0.40411	0.13877	0.14235	2.6315	0.24967	2.3292	-0.11325	-0.87445	-0.32643	0.81523	0.14402	0.89805	0.14073	-0.60447	1.2623	1.5767	-0.14963	0.80099	1.5563	-0.091522	-0.43177	0.28596	0.18536	0.30458	-0.14394	-1.4132	0.96703
Hibernicoceras touissitense	Korn & Ebbighausen (2008, text-fig. 42F)	-0.31321	0.79623	0.37789	0.50696	0.93532	-0.30122	0.092955	-0.20003	-0.55943	0.95707	-0.20101	-0.86043	-0.74475	0.26259	-1.1775	1.0619	-0.56179	-0.39011	0.24764	-0.093462	1.0473	-0.56806	0.39332	1.3197	0.22176	-1.9586	0.80115	0.20921	1.3991	0.16761	-0.16217	-2.222	-0.16421	-0.40412	0.75876	-2.6588	-0.42341	-1.2522	0.83426	-0.029619	-0.76993	-1.3246	-0.48101	1.255	0.54074	-2.4552	0.51134	-0.02994
Hypergoniatites exiguus	Ruzhencev & Bogoslovskaya (1971, text-fig. 38d)	0.40391	0.66784	-0.12173	-0.29101	0.2485	-0.72018	-0.48201	0.31973	-0.045645	-0.91849	0.29117	1.0561	1.407	1.5025	0.45803	1.7833	-0.14569	0.028733	-2.0195	0.91533	0.63545	-0.64366	-0.39718	-0.25618	-0.57513	-0.9917	0.2377	-0.10821	-1.0031	0.11888	0.58752	0.4269	0.03025	1.0465	0.66966	0.63034	2.2319	-0.13791	-0.80958	-0.94936	1.4167	1.593	0.50431	-0.43805	-0.363	0.78513	-1.5223	0.66877
Hypergoniatites fusiger	Klug et al. (2006, text-fig. 30D)	-1.1812	-1.6678	2.8633	-0.7634	-0.39166	0.62433	-0.82534	-0.31515	1.4917	-0.62874	2.2263	-1.9985	1.0766	1.2462	-0.64965	0.60127	1.6309	0.69687	1.5879	-0.9695	-0.56887	-1.1353	1.3523	1.3747	-0.96245	0.4351	0.51298	-0.96087	-0.76787	-0.83105	-1.1313	-0.14533	-0.061566	-0.686	-0.99032	-0.18588	0.36617	-0.73498	-0.78314	-0.98247	0.43116	0.74316	-0.26064	-0.45164	1.1367	0.15931	-0.085434	0.33834
Hypergoniatites tenuiliratus	Ruzhencev & Bogoslovskaya (1971, text-fig. 37v)	1.1196	-0.27553	1.0707	-1.3397	-0.10824	-1.389	-0.12869	1.5223	0.94297	-0.2487	0.72951	1.2962	0.98302	-0.49522	0.93204	-1.4924	0.73686	1.2282	0.61466	-1.2985	1.1425	-1.1459	-1.5522	-0.93407	-0.42885	-1.372	-0.08532	-1.3695	1.1813	-1.0643	1.3444	-0.2279	-0.28619	-0.5661	1.0005	0.79004	-0.23874	0.97682	1.8191	0.25861	1.7309	-0.33057	0.95811	-0.69286	-0.40003	-2.5253	0.75922	-0.475
Lusitanoceras zirari	Korn & Ebbighausen (2008, text-fig. 50F)	0.84397	2.3854	0.55756	0.93188	0.030025	0.037436	-1.4259	0.61914	0.81608	-2.6284	-1.1532	1.3544	-1.4791	0.98698	-0.23064	-0.82914	2.2503	-0.61582	1.6716	-0.12176	0.60616	-0.63707	-0.84884	0.50518	-0.42221	-1.0044	0.049659	1.6254	0.43233	0.046222	1.125	0.27414	1.5332	0.33953	-1.7549	0.24837	-0.56838	-0.66148	-1.2361	-0.35196	-1.0166	-0.99241	-1.0818	-0.59736	0.033496	0.4444	-0.80733	0.24999
Neogoniatites canovasi	Korn & Feist (2007, text-fig. 19)	0.32591	-1.4101	-1.4842	-0.68909	1.1678	-0.39769	0.11459	-0.085705	-0.8409	1.4258	1.4974	1.2743	1.5814	0.79164	0.35576	-1.5919	0.80238	-1.5891	-0.027515	-1.0225	-2.0914	-0.84049	-0.47433	0.49932	1.0652	-1.1043	-0.38363	1.4145	1.547	-1.0222	-0.0477	-0.61384	1.5814	-0.42817	0.44486	0.285	-1.0493	-0.12535	-0.36311	-1.1058	-1.1882	1.7339	-0.6717	1.2197	0.014458	0.97305	0.31203	1.2368
Neogoniatites latus	Ruzhencev & Bogoslovskaya (1971, text-fig. 36g)	-0.031086	1.306	0.78485	-0.43955	-1.2363	-1.9819	-0.85045	-0.1956	0.39586	0.87812	-0.22308	-1.0632	-0.50617	-1.5939	0.78664	0.68836	-1.65	-1.7694	-0.71127	-0.057231	-0.69297	-0.92568	0.10341	0.94296	0.091139	1.4608	-1.1266	-0.1539	0.59903	-0.64818	-0.6077	-1.2592	2.9398	-1.1589	-0.74437	0.91643	0.43795	0.41188	0.85609	0.54872	0.71795	-0.13311	0.52966	-0.77729	-0.81979	0.46053	-0.8624	1.3198
Neogoniatites milleri	Ruzhencev & Bogoslovskaya (1971, text-fig. 36v)	0.50892	0.99234	1.2751	-0.74344	0.80753	-0.052829	1.0429	-0.011335	1.8095	-0.5519	-0.44145	-0.56614	-0.016738	-0.86296	2.323	-0.52612	-0.15131	-0.083548	-1.3274	-0.74621	0.80437	-0.52712	0.90583	-1.1681	0.77459	0.55677	1.3874	-0.83502	0.34207	0.69014	-1.0609	-0.78971	-0.06013	-0.46879	1.2288	-1.5283	0.15699	0.60123	-1.7875	0.062327	-1.0812	0.039256	-2.8506	-0.7549	-1.9377	0.78978	0.9472	0.0054773
Neogoniatites ruginosus	Ruzhencev & Bogoslovskaya (1971, text-fig. 36a)	0.38947	0.89	0.4502	-0.92217	0.028157	0.90814	-0.23618	-1.1311	-0.57453	-0.62342	-0.16445	0.58421	1.2954	1.6276	1.6822	1.1563	0.42343	0.13301	-1.0722	0.22143	-0.66277	0.66924	0.61715	-0.96706	-0.47554	0.28071	0.46588	-0.41584	-0.38915	-0.48616	0.52755	-0.43424	0.86779	1.3944	1.3927	-0.98635	-1.1032	-1.278	-0.43899	1.7091	0.21175	0.054167	0.96227	1.2307	-0.45984	-0.51078	-0.59885	0.97459
Neogoniatites worki	Klug et al. (2006, text-fig. 33B)	-1.0885	0.0096085	-0.075613	-1.0197	-1.9872	1.4115	-0.38622	-1.6684	0.85161	1.3926	-0.58077	1.0008	0.2147	-1.6564	-0.28623	-0.50659	1.8341	0.83695	-0.91626	0.27075	-0.30306	-0.41664	0.14922	-0.61241	-0.17408	0.2913	0.94056	1.696	-0.093107	0.33654	0.82394	-0.77293	0.70554	-0.026278	0.5921	0.036275	0.33582	-0.54369	0.35431	0.45761	1.2551	0.22375	-0.9862	1.5474	1.0763	0.68903	0.51396	-2.5967
Paraglyphioceras celeris	Korn & Ebbighausen (2008, text-fig. 48D)	0.25867	-0.69615	-0.31817	-0.64746	0.43181	-3.4666	-0.8643	0.59889	0.50994	0.26211	0.11242	0.95395	0.56356	-0.56644	-2.0291	-0.58186	0.16701	0.20184	0.6083	1.4457	1.1557	0.6982	0.53841	0.61754	-0.077551	1.0741	-0.24179	-0.26169	-1.0354	0.0067084	1.2099	-1.1291	-1.8116	-1.1614	1.4121	-0.75625	-0.10818	1.0568	-1.6172	0.069136	-1.7554	0.27085	0.080176	0.76939	0.086185	1.3998	-1.0631	-0.15126
Paraglyphioceras rudis	Korn & Ebbighausen (2008, text-fig. 46G)	0.93617	0.16493	-0.13233	0.83892	1.4127	0.60802	-2.3822	0.68721	-1.512	1.589	-0.2571	2.2785	0.81803	-1.0073	-0.076383	0.71482	0.24804	-0.98481	1.0071	-1.839	-0.42193	-0.82624	1.9928	-0.93325	-0.49194	0.78898	0.77803	-1.3917	0.090036	0.89135	-1.1333	1.8406	-0.54863	-0.60025	-0.095033	-0.14899	0.91928	-0.88177	0.6442	-0.77244	0.073465	-1.8628	0.38967	-0.21195	-0.86833	1.1063	0.10862	-0.99244
Platygoniatites molaris	Ruzhencev & Bogoslovskaya (1971, text-fig. 41g)	2.9156	-1.4741	2.2283	3.9163	-0.5376	-0.47851	1.3725	-3.0004	-0.37557	-1.1499	0.31993	0.68174	1.3551	-1.8066	-0.81864	-0.40897	-0.94861	0.63164	-0.34373	0.22884	-0.44964	-0.09702	-0.070727	0.018119	-0.32928	-0.6342	-0.065684	0.4858	0.098343	0.11536	-0.015487	0.12047	0.26811	0.13311	-0.004107	-0.02756	-0.16403	-0.011839	-0.067391	0.009431	-0.044484	0.12662	0.069784	-0.097892	0.03017	0.021991	-0.10603	0.13821
Platygoniatites nudus	Ruzhencev & Bogoslovskaya (1971, text-fig. 41d)	-0.56865	0.89274	0.69909	-0.76037	-2.149	-0.31031	1.2737	0.53707	-1.153	0.99059	1.206	1.5697	-0.24675	0.57582	-1.0336	0.22235	-1.0868	-0.4362	-0.028604	3.227	-0.28943	-0.6943	0.19863	0.39939	-0.25704	-1.5729	-0.025157	-1.4694	-0.052192	-0.17625	-0.33063	0.43384	-0.74978	-0.39156	-0.51036	1.0059	-1.0838	-2.546	-0.21353	-0.10474	0.37339	-0.6753	-1.4908	-0.84199	-1.1925	0.21537	0.64873	-0.029556
Platygoniatites omniliratus	Ruzhencev & Bogoslovskaya (1971, text-fig. 39v)	0.6026	1.7705	1.8716	-0.2661	-0.23287	0.14549	1.026	1.3225	-0.10126	-0.084483	-1.6263	-0.27019	0.32385	0.73642	0.45154	-0.33454	0.051505	0.5463	-0.27748	-0.28561	-2.212	1.3173	3.09	-0.40313	1.1379	-1.4011	-1.2582	0.56865	-0.66461	-1.0224	-0.033773	-0.2879	-1.6522	-0.63678	-0.42935	1.8282	-0.5752	1.6426	1.2232	0.12675	-0.91027	-0.017814	0.14429	0.85205	0.97433	0.30424	-0.38715	-0.61397
Platygoniatites rhanemensis	Klug et al. (2006, text-fig. 41F)	-0.069129	1.3598	1.047	-1.0016	-1.3634	-0.19351	-0.86637	-1.6667	0.25741	1.0959	-0.47768	1.1759	-1.1139	1.4674	-0.98133	-2.293	-2.2397	0.057645	0.99874	-1.9209	0.7785	0.43947	-0.63801	0.36775	-0.083437	0.48152	-1.7185	0.1199	-1.5472	0.0053008	-1.4849	1.7574	0.42159	0.66979	0.73788	-1.2894	0.32362	0.25474	-0.7669	0.53773	0.12809	1.099	0.58232	0.79738	0.16303	-0.71803	0.34484	-0.086961
Platygoniatites superior	Ruzhencev & Bogoslovskaya (1971, text-fig. 42v)	0.79296	0.61553	1.8766	-0.6952	1.3073	0.87376	2.622	2.9972	-0.17194	2.1635	-1.2249	-0.11199	1.3719	-1.0909	-0.72698	0.33615	0.059036	0.72847	0.75684	0.14845	-1.0192	0.78169	-2.3658	0.75564	-0.74193	1.348	0.27967	1.2343	-0.10617	0.88659	-0.09988	0.4728	0.45014	0.486	-0.74651	-1.0024	0.31308	-0.75129	-1.1908	0.181	0.57921	0.25388	0.45055	0.048425	0.2239	0.051564	-0.36997	0.4912
Progoniatites maghribensis	Korn et al. (2003, text-fig. 32B)	-0.43257	-1.2563	-0.28075	-1.2174	-0.32368	-1.2991	0.85874	-0.19486	-0.67996	-0.85873	-0.72884	1.071	-0.95205	-0.51607	-0.63533	1.2539	1.2096	0.22839	0.26486	0.3848	0.48154	0.4614	1.4962	-1.6603	-1.5195	0.047152	-0.16292	1.511	0.68497	-1.025	-2.3325	-0.99235	0.85329	-0.96197	-0.61894	-0.68494	0.67453	0.21155	-0.4257	0.66026	0.81565	-0.80809	1.2658	0.25876	0.016383	-0.50746	-1.0461	0.086284
[truncated: 7 more columns]

## Sheet: values VLS
Var-covar	Eigenvalue	% variance
1	0.0562058	79.216
2	0.00775141	10.925
3	0.0028244	3.9807
4	0.00147867	2.084
5	0.000829618	1.1693
6	0.000544856	0.76792
7	0.000280068	0.39473
8	0.000198693	0.28004
9	0.000162321	0.22878
10	0.000141734	0.19976
11	9.3329e-05	0.13154
12	8.2495e-05	0.11627
13	7.25211e-05	0.10221
14	6.63999e-05	0.093584
15	4.40322e-05	0.062059
16	3.24303e-05	0.045707
17	2.29289e-05	0.032316
18	2.10041e-05	0.029603
19	1.60624e-05	0.022638
20	1.46319e-05	0.020622
21	1.23716e-05	0.017436
22	8.36199e-06	0.011785
23	6.94371e-06	0.0097864
24	6.70522e-06	0.0094503
25	6.04369e-06	0.008518
26	5.74789e-06	0.0081011
27	4.16476e-06	0.0058698
28	3.35686e-06	0.0047312
29	2.84169e-06	0.0040051
30	1.84127e-06	0.0025951
31	1.55656e-06	0.0021938
32	1.25254e-06	0.0017653
33	1.14051e-06	0.0016074
34	1.00812e-06	0.0014208
35	8.2775e-07	0.0011666
36	7.15451e-07	0.0010084
37	6.62167e-07	0.00093326
38	5.93716e-07	0.00083678
39	5.24898e-07	0.00073979
40	4.00316e-07	0.0005642
41	3.18146e-07	0.00044839
42	2.57872e-07	0.00036344
43	1.89334e-07	0.00026685
44	1.86368e-07	0.00026267
45	1.66955e-07	0.00023531
46	1.4998e-07	0.00021138
47	1.3426e-07	0.00018923
48	1.01629e-07	0.00014324
49	9.4822e-08	0.00013364
50	7.52891e-08	0.00010611
51	6.47543e-08	9.1265e-05
52	4.85932e-08	6.8487e-05
53	3.553e-08	5.0076e-05
54	1.91165e-08	2.6943e-05
55	3.47546e-34	4.8983e-31
56	6.18201e-69	8.7129e-66
