# Supplementary material for: Quantitative analysis of suture lines in Carboniferous ammonoids
Source: Copernicus journal article supplement (doi:10.5194/fr-21-223-2018), 2018-09-11
Supplement: Supplementary file 2 [file fr-21-223-2018-supplement.zip › metric data analysis.xls]

## Sheet: taxonomy
Goniatitoidea	Goniatitidae	Progoniatitinae	Progoniatites maghribensis
Goniatitoidea	Goniatitidae	Goniatitinae	Goniatites americanus
Goniatitoidea	Goniatitidae	Goniatitinae	Goniatites crenistria
Goniatitoidea	Goniatitidae	Goniatitinae	Goniatites deceptus
Goniatitoidea	Goniatitidae	Goniatitinae	Goniatites deceptus
Goniatitoidea	Goniatitidae	Goniatitinae	Goniatites eganensis
Goniatitoidea	Goniatitidae	Goniatitinae	Goniatites eganensis
Goniatitoidea	Goniatitidae	Goniatitinae	Goniatites evelinae
Goniatitoidea	Goniatitidae	Goniatitinae	Goniatites gerberi
Goniatitoidea	Goniatitidae	Goniatitinae	Goniatites globostriatus
Goniatitoidea	Goniatitidae	Goniatitinae	Goniatites hudsoni
Goniatitoidea	Goniatitidae	Goniatitinae	Goniatites lazarus
Goniatitoidea	Goniatitidae	Goniatitinae	Goniatites moorei
Goniatitoidea	Goniatitidae	Goniatitinae	Goniatites rodioni
Goniatitoidea	Goniatitidae	Goniatitinae	Goniatites sphaericus
Goniatitoidea	Goniatitidae	Goniatitinae	Goniatites spirifer
Goniatitoidea	Goniatitidae	Goniatitinae	Goniatites stenumbilicatus
Goniatitoidea	Goniatitidae	Goniatitinae	Hypergoniatites exiguus
Goniatitoidea	Goniatitidae	Goniatitinae	Hypergoniatites fusiger
Goniatitoidea	Goniatitidae	Goniatitinae	Hypergoniatites tenuiliratus
Goniatitoidea	Goniatitidae	Arnsbergitinae	Arnsbergites arnsbergensis
Goniatitoidea	Goniatitidae	Arnsbergitinae	Arnsbergites ferrus
Goniatitoidea	Goniatitidae	Arnsbergitinae	Arnsbergites gracilis
Goniatitoidea	Goniatitidae	Arnsbergitinae	Arnsbergites proiecturus
Goniatitoidea	Goniatitidae	Arnsbergitinae	Arnsbergites robustus
Goniatitoidea	Goniatitidae	Arnsbergitinae	Arnsbergites rufus
Goniatitoidea	Goniatitidae	Arnsbergitinae	Arnsbergites sphaericostriatus
Goniatitoidea	Goniatitidae	Arnsbergitinae	Arnsbergites warslowensis
Goniatitoidea	Goniatitidae	Arnsbergitinae	Hibernicoceras artilobatum
Goniatitoidea	Goniatitidae	Arnsbergitinae	Hibernicoceras carraunense
Goniatitoidea	Goniatitidae	Arnsbergitinae	Hibernicoceras touissitense
Goniatitoidea	Goniatitidae	Arnsbergitinae	Paraglyphioceras celeris
Goniatitoidea	Goniatitidae	Arnsbergitinae	Paraglyphioceras rudis
Goniatitoidea	Goniatitidae	Arnsbergitinae	Neogoniatites canovasi
Goniatitoidea	Goniatitidae	Arnsbergitinae	Neogoniatites latus
Goniatitoidea	Goniatitidae	Arnsbergitinae	Neogoniatites milleri
Goniatitoidea	Goniatitidae	Arnsbergitinae	Neogoniatites ruginosus
Goniatitoidea	Goniatitidae	Arnsbergitinae	Neogoniatites worki
Goniatitoidea	Delepinoceratidae	Dombaritinae	Lusitanoceras zirari
Goniatitoidea	Delepinoceratidae	Dombaritinae	Revilloceras bellornatum
Goniatitoidea	Delepinoceratidae	Dombaritinae	Revilloceras granofalcatum
Goniatitoidea	Delepinoceratidae	Dombaritinae	Dombarites carinatus
Goniatitoidea	Delepinoceratidae	Dombaritinae	Dombarites falcatoides
Goniatitoidea	Delepinoceratidae	Dombaritinae	Dombarites linteroides
Goniatitoidea	Delepinoceratidae	Dombaritinae	Dombarites liratostriatus
Goniatitoidea	Delepinoceratidae	Dombaritinae	Dombarites liratus
Goniatitoidea	Delepinoceratidae	Dombaritinae	Dombarites parafalcatoides
Goniatitoidea	Delepinoceratidae	Dombaritinae	Dombarites paratectus
Goniatitoidea	Delepinoceratidae	Dombaritinae	Dombarites semiliratus
Goniatitoidea	Delepinoceratidae	Dombaritinae	Dombarites tectus
Goniatitoidea	Delepinoceratidae	Delepinoceratinae	Platygoniatites molaris
Goniatitoidea	Delepinoceratidae	Delepinoceratinae	Platygoniatites nudus
Goniatitoidea	Delepinoceratidae	Delepinoceratinae	Platygoniatites omniliratus
Goniatitoidea	Delepinoceratidae	Delepinoceratinae	Platygoniatites rhanemensis
Goniatitoidea	Delepinoceratidae	Delepinoceratinae	Platygoniatites superior

## Sheet: data
		MS	MS		EL									VLS				AL		ratios
species	source	height	1	2	1	2	3	4	5	6	7	8	9	1	2	3	4	2	3	EL1/VLS1	EL3/VLS2	EL5/VLS3	EL7/VLS4	EL_h/MS_h	EL_h/EL1	EL_h/EL2	EL_h/EL3	EL_h/EL4	EL_h/EL5	EL_h/EL6	EL_h/EL7	EL_h/EL8	EL_h/EL9
		in mm	in mm	in mm	in mm	in mm	in mm	in mm	in mm	in mm	in mm	in mm	in mm	in mm	in mm	in mm	in mm	in mm	in mm
Arnsbergites arnsbergensis	Korn (1988, text-fig. 48B)	48.599	41.251	34.762	127.937	98.613	82.756	75.59	72.113	72.01	71.027	66.032	54.519	85.581	65.597	52.13	41.27	59.516	33.015	1.495	1.262	1.383	1.721	2.058	0.782	1.014	1.208	1.323	1.387	1.389	1.408	1.514	1.834
Arnsbergites ferrus	Korn & Ebbighausen (2008, text-fig. 31G)	56.139	37.767	28.358	118.813	98.025	84.047	75.087	72.041	68.994	62.184	57.167	51.074	84.565	69.276	48.494	34.639	66.409	30.577	1.405	1.213	1.486	1.795	1.781	0.842	1.02	1.19	1.332	1.388	1.449	1.608	1.749	1.958
Arnsbergites gracilis	Korn (1988, text-fig. 45C)	45.635	31.784	22.401	119.166	96.939	84.215	75.127	70.281	67.452	62.81	54.731	46.853	88.458	73.311	50.692	32.313	54.731	16.56	1.347	1.149	1.386	1.944	2.191	0.839	1.032	1.187	1.331	1.423	1.483	1.592	1.827	2.134
Arnsbergites proiecturus	Korn & Ebbighausen (2008, text-fig. 35C)	45.755	24.36	21.315	102.55	71.675	59.405	52.315	49.248	46.566	44.075	38.518	30.853	88.832	76.436	55.877	43.402	53.17	14.054	1.154	0.777	0.881	1.016	2.186	0.975	1.395	1.683	1.911	2.031	2.147	2.269	2.596	3.241
Arnsbergites robustus	Korn & Ebbighausen (2008, text-fig. 26B)	52.909	29.993	27.231	113.854	93.732	81.692	73.999	69.064	64.722	58.608	49.136	35.913	97.745	79.919	55.845	36.508	60.776	19.732	1.165	1.022	1.237	1.605	1.89	0.878	1.067	1.224	1.351	1.448	1.545	1.706	2.035	2.785
Arnsbergites rufus	Korn & Ebbighausen (2008, text-fig. 38B)	51.735	26.383	22.641	98.031	82.121	73.699	64.341	58.959	56.151	52.174	43.985	35.595	78.349	62.132	39.807	22.747	61.499	19.166	1.251	1.186	1.481	2.294	1.933	1.02	1.218	1.357	1.554	1.696	1.781	1.917	2.274	2.809
Arnsbergites sphaericostriatus	Korn & Ebbighausen (2008, text-fig. 28D)	47.66	21.346	17.961	95.683	73.45	63.416	57.595	53.783	50.17	46.157	39.935	32.51	62.536	51.616	38.919	29.12	48.387	21.052	1.53	1.229	1.382	1.585	2.098	1.045	1.361	1.577	1.736	1.859	1.993	2.167	2.504	3.076
Arnsbergites warslowensis	Korn & Ebbighausen (2008, text-fig. 26C)	47.69	25.937	25.048	114.559	95.164	84.859	77.585	71.523	64.452	56.37	46.067	32.731	87.594	65.806	42.019	29.569	58.025	22.356	1.308	1.29	1.702	1.906	2.097	0.873	1.051	1.178	1.289	1.398	1.552	1.774	2.171	3.055
Revilloceras bellornatum	Klug et al. (2006, text-fig. 37B)	49.807	20.738	20.211	112.3	97.186	85.939	73.988	66.08	62.565	55.184	41.827	32.688	84.709	65.377	39.015	23.725	51.844	13.357	1.326	1.315	1.694	2.326	2.008	0.89	1.029	1.164	1.352	1.513	1.598	1.812	2.391	3.059
Dombarites carinatus	Ruzhencev & Bogoslovskaya (1971, text-fig. 46a)	69.686	31.415	23.741	139.505	124.182	109.81	94.314	81.29	71.186	61.08	53.219	50.075	85.083	71.409	44.462	23.803	51.871	15.044	1.64	1.538	1.828	2.566	1.435	0.717	0.805	0.911	1.06	1.23	1.405	1.637	1.879	1.997
Revilloceras granofalcatum	Klug et al. (2006, text-fig. 35F)	52.556	34.788	22.539	104.116	92.358	78.149	67.859	65.409	63.696	58.551	53.16	46.301	80.354	66.636	39.933	26.948	55.365	14.944	1.296	1.173	1.638	2.173	1.903	0.96	1.083	1.28	1.474	1.529	1.57	1.708	1.881	2.16
Dombarites falcatoides	Ruzhencev & Bogoslovskaya (1971, text-fig. 44d)	65.341	22.52	16.529	121.487	107.646	92.769	77.273	67.975	61.57	53.1	43.182	34.505	83.885	68.801	45.455	24.586	48.554	12.811	1.448	1.348	1.495	2.16	1.53	0.823	0.929	1.078	1.294	1.471	1.624	1.883	2.316	2.898
Dombarites linteroides	Ruzhencev & Bogoslovskaya (1971, text-fig. 51b)	64.706	30.93	22.339	131.062	117.646	102.58	86.48	74.921	68.936	62.333	52.631	47.678	85.757	71.414	46.025	26.213	50.774	11.97	1.528	1.436	1.628	2.378	1.545	0.763	0.85	0.975	1.156	1.335	1.451	1.604	1.9	2.097
Dombarites liratostriatus	Ruzhencev & Bogoslovskaya (1971, text-fig. 50v)	65.313	33.992	24.432	139.794	124.071	106.864	89.868	81.37	76.696	69.261	57.786	49.713	83.813	67.771	48.864	26.132	45.039	14.023	1.668	1.577	1.665	2.65	1.531	0.715	0.806	0.936	1.113	1.229	1.304	1.444	1.731	2.012
Dombarites liratus	Ruzhencev & Bogoslovskaya (1971, text-fig. 50b)	58.209	27.946	21.709	140.883	126.102	112.705	95.155	80.834	71.596	61.435	48.038	39.954	91.792	74.829	45.499	22.633	51.273	11.779	1.535	1.506	1.777	2.714	1.718	0.71	0.793	0.887	1.051	1.237	1.397	1.628	2.082	2.503
Dombarites parafalcatoides	Ruzhencev & Bogoslovskaya (1971, text-fig. 49v)	48.744	28.148	23.114	129.752	112.587	97.484	81.466	71.17	64.074	55.151	44.394	36.386	92.68	75.516	45.54	26.545	56.524	13.5	1.4	1.291	1.563	2.078	2.052	0.771	0.888	1.026	1.228	1.405	1.561	1.813	2.253	2.748
Dombarites paratectus	Ruzhencev & Bogoslovskaya (1971, text-fig. 48g)	75.661	29.91	22.569	141.395	129.431	116.651	101.424	88.916	82.118	73.417	61.181	53.295	83.749	64.987	40.515	19.306	46.225	14.683	1.688	1.795	2.195	3.803	1.322	0.707	0.773	0.857	0.986	1.125	1.218	1.362	1.635	1.876
Dombarites semiliratus	Ruzhencev & Bogoslovskaya (1971, text-fig. 51v)	66.326	33.927	27.805	132.907	119.641	103.06	86.478	77.294	71.939	65.306	57.909	50.764	86.989	72.703	47.705	25.51	47.449	11.991	1.528	1.418	1.62	2.56	1.508	0.752	0.836	0.97	1.156	1.294	1.39	1.531	1.727	1.97
Dombarites tectus	Ruzhencev & Bogoslovskaya (1971, text-fig. 48b)	70.87	25.166	19.394	135.734	123.294	111.289	96.742	81.274	75.039	62.803	50.796	43.869	88.588	69.729	41.56	20.549	54.722	15.008	1.532	1.596	1.956	3.056	1.411	0.737	0.811	0.899	1.034	1.23	1.333	1.592	1.969	2.28
Goniatites americanus	Korn & Titus (2011, text-fig. 43J)	45.802	36.444	30.407	120.155	97.382	83.244	69.633	60.209	53.927	50	45.549	41.622	78.795	67.8	50.784	26.702	43.977	14.135	1.525	1.228	1.186	1.872	2.183	0.832	1.027	1.201	1.436	1.661	1.854	2	2.195	2.403
Goniatites crenistria	Korn & Ebbighausen (2008, text-fig. 18C)	48.253	24.329	19.65	120.71	98.018	76.729	62.928	53.103	47.02	43.278	38.833	30.411	84.684	72.051	50.53	27.838	56.377	20.119	1.425	1.065	1.051	1.555	2.072	0.828	1.02	1.303	1.589	1.883	2.127	2.311	2.575	3.288
Goniatites evelinae	Klug et al. (2006, text-fig. 26D)	37.233	26.883	20.344	89.347	75.854	63.646	53.185	46.209	43.158	39.889	37.055	31.823	62.469	47.953	31.388	19.4	54.057	20.707	1.43	1.327	1.472	2.056	2.686	1.119	1.318	1.571	1.88	2.164	2.317	2.507	2.699	3.142
Goniatites sphaericus	Korn (1988, text-fig. 38E)	48.213	27.631	21.786	118.32	95.469	79.237	66.422	59.587	54.033	50.83	44.211	36.947	92.369	70.2	50.989	33.006	54.436	24.385	1.281	1.129	1.169	1.54	2.074	0.845	1.047	1.262	1.506	1.678	1.851	1.967	2.262	2.707
Goniatites gerberi	Klug et al. (2006, text-fig. 24F)	37.789	24.564	19.019	99.251	81.223	65.573	55.469	49.327	44.574	40.216	39.225	33.678	66.961	58.837	38.63	24.168	49.922	15.057	1.482	1.114	1.277	1.664	2.646	1.008	1.231	1.525	1.803	2.027	2.243	2.487	2.549	2.969
Goniatites globostriatus	Korn & Ebbighausen (2008, text-fig. 25)	44.093	27.449	18.227	122.015	100.357	81.914	66.476	58.756	52.751	46.962	39.457	34.096	86.419	73.123	53.181	33.666	49.749	17.155	1.412	1.12	1.105	1.395	2.268	0.82	0.996	1.221	1.504	1.702	1.896	2.129	2.534	2.933
Goniatites hudsoni	Korn & Tilsley (2006, text-fig. 24C)	31.641	24.439	15.93	97.324	76.374	66.774	59.789	51.935	43.642	38.623	35.785	30.114	78.337	65.683	43.207	27.496	54.117	21.602	1.242	1.017	1.202	1.405	3.16	1.027	1.309	1.498	1.673	1.925	2.291	2.589	2.794	3.321
Goniatites lazarus	Korn et al. (2005, text-fig. 3.6)	33.364	26.226	20.282	103.26	77.241	64.538	57.983	53.064	46.508	39.134	36.673	33.6	73.011	63.308	46.099	32.781	52.245	24.38	1.414	1.019	1.151	1.194	2.997	0.968	1.295	1.549	1.725	1.885	2.15	2.555	2.727	2.976
Goniatites moorei	Korn & Tilsley (2006, text-fig. 26F)	40.369	28.758	18.788	97.644	81.639	68.42	59.605	53.344	47.083	44.53	42.907	36.412	79.929	69.813	48.705	29.454	57.286	17.858	1.222	0.98	1.095	1.512	2.477	1.024	1.225	1.462	1.678	1.875	2.124	2.246	2.331	2.746
Goniatites rodioni	Klug et al. (2006, text-fig. 21F)	35.413	15.78	13.945	78.605	66.055	57.248	47.779	39.633	31.265	25.761	21.579	17.835	60.386	52.404	34.128	17.395	39.193	13.211	1.302	1.092	1.161	1.481	2.824	1.272	1.514	1.747	2.093	2.523	3.198	3.882	4.634	5.607
Goniatites spirifer	Korn (1990, text-fig. 12B)	50.269	26.756	20.268	117.299	97.297	77.837	64.324	61.079	58.647	56.486	50.81	41.894	78.649	64.594	45.675	31.62	50.539	17.028	1.491	1.205	1.337	1.786	1.989	0.853	1.028	1.285	1.555	1.637	1.705	1.77	1.968	2.387
Goniatites stenumbilicatus	Klug et al. (2006, text-fig. 28B)	54.061	16.394	13.349	100.474	80.332	66.514	59.02	50.822	42.86	36.067	26.699	18.267	79.629	62.532	39.346	22.951	37.942	9.837	1.262	1.064	1.292	1.571	1.85	0.995	1.245	1.503	1.694	1.968	2.333	2.773	3.745	5.474
Goniatites deceptus	Korn & Titus (2011, text-fig. 48E)	44.697	21.222	16.417	94.298	76.479	66.469	60.263	54.657	50.252	45.647	40.642	33.034	71.474	56.659	33.034	23.024	53.255	20.221	1.319	1.173	1.655	1.983	2.237	1.06	1.308	1.504	1.659	1.83	1.99	2.191	2.46	3.027
Goniatites deceptus	Korn & Titus (2011, text-fig. 48F)	40.102	24.49	17.219	107.959	82.042	70.408	62.245	57.143	52.652	47.348	42.653	37.144	81.327	67.142	44.287	32.042	65.917	23.674	1.327	1.049	1.29	1.478	2.494	0.926	1.219	1.42	1.607	1.75	1.899	2.112	2.345	2.692
Goniatites eganensis	Korn & Titus (2011, text-fig. 54C)	49.021	21.265	19.474	100.73	74.093	62.005	53.947	49.918	45.216	39.845	34.696	25.295	73.51	61.782	42.53	28.875	42.083	9.401	1.37	1.004	1.174	1.38	2.04	0.993	1.35	1.613	1.854	2.003	2.212	2.51	2.882	3.953
Goniatites eganensis	Korn & Titus (2011, text-fig. 54D)	35.297	23.975	19.976	92.372	74.035	65.34	59.231	55.467	51.944	47.479	42.307	34.785	83.857	67.69	44.186	29.849	55.001	19.039	1.102	0.965	1.255	1.591	2.833	1.083	1.351	1.53	1.688	1.803	1.925	2.106	2.364	2.875
Hibernicoceras artilobatum	Korn & Ebbighausen (2008, text-fig. 44E)	40.134	21.974	15.787	102.187	77.867	68.267	60.587	55.467	51.841	47.146	42.241	35.626	76.8	61.441	41.813	29.013	49.707	21.759	1.331	1.111	1.327	1.625	2.492	0.979	1.284	1.465	1.651	1.803	1.929	2.121	2.367	2.807
Hibernicoceras carraunense	Korn & Ebbighausen (2008, text-fig. 40F)	45.69	35.799	27.32	120.348	92.558	80.547	73.482	67.828	62.648	57.702	52.52	46.868	72.068	64.531	49.223	34.621	44.513	13.189	1.67	1.248	1.378	1.667	2.189	0.831	1.08	1.242	1.361	1.474	1.596	1.733	1.904	2.134
Hibernicoceras touissitense	Korn & Ebbighausen (2008, text-fig. 42F)	50.353	33.882	20.471	128.707	100.471	85.647	76.942	71.53	63.765	56.706	51.765	47.294	82.119	73.177	51.765	36	55.059	14.353	1.567	1.17	1.382	1.575	1.986	0.777	0.995	1.168	1.3	1.398	1.568	1.763	1.932	2.114
Hypergoniatites exiguus	Ruzhencev & Bogoslovskaya (1971, text-fig. 38d)	42.055	21.277	16.324	112.017	88.214	73.612	62.21	52.209	44.607	37.606	30.804	25.004	86.553	69.611	51.408	29.804	39.006	14.002	1.294	1.057	1.016	1.262	2.378	0.893	1.134	1.358	1.607	1.915	2.242	2.659	3.246	3.999
Hypergoniatites fusiger	Klug et al. (2006, text-fig. 30D)	41.219	16.2	12.805	98.757	87.805	74.933	63.212	52.644	43.23	35.352	27.86	18.83	66.807	48.227	30.165	16.524	45.152	19.021	1.478	1.554	1.745	2.139	2.426	1.013	1.139	1.335	1.582	1.9	2.313	2.829	3.589	5.311
Hypergoniatites tenuiliratus	Ruzhencev & Bogoslovskaya (1971, text-fig. 37v)	36.831	13.858	10.963	126.39	99.491	82.737	69.085	56.054	44.885	35.163	25.235	16.34	87.404	68.671	48.815	29.165	50.262	19.443	1.446	1.205	1.148	1.206	2.715	0.791	1.005	1.209	1.447	1.784	2.228	2.844	3.963	6.12
Lusitanoceras zirari	Korn & Ebbighausen (2008, text-fig. 50F)	52.128	30.674	28.794	146.543	126.507	106.736	85.274	75.025	70.771	62.843	52.981	40.412	107.181	86.046	63.229	37.319	62.457	25.91	1.367	1.24	1.187	1.684	1.918	0.682	0.79	0.937	1.173	1.333	1.413	1.591	1.887	2.475
Neogoniatites canovasi	Korn & Feist (2007, text-fig. 19)	52.991	28.042	22.474	99.176	85.36	72.578	65.155	60.411	55.463	53.815	51.133	42.886	67.628	52.371	37.938	21.856	39.382	20.619	1.466	1.386	1.592	2.462	1.887	1.008	1.172	1.378	1.535	1.655	1.803	1.858	1.956	2.332
Neogoniatites latus	Ruzhencev & Bogoslovskaya (1971, text-fig. 36g)	69.968	39.515	29.278	177.243	148.291	124.203	108.29	98.788	91.272	82.653	69.615	61.218	96.904	78.233	54.366	35.138	53.923	20.773	1.829	1.588	1.817	2.352	1.429	0.564	0.674	0.805	0.923	1.012	1.096	1.21	1.436	1.634
Neogoniatites milleri	Ruzhencev & Bogoslovskaya (1971, text-fig. 36v)	65.116	32.791	23.952	154.418	127.907	109.535	98.371	90.465	84.187	73.023	57.673	47.208	92.094	72.559	47.208	32.791	50	14.65	1.677	1.51	1.916	2.227	1.536	0.648	0.782	0.913	1.017	1.105	1.188	1.369	1.734	2.118
Neogoniatites ruginosus	Ruzhencev & Bogoslovskaya (1971, text-fig. 36a)	57.569	34.862	21.56	140.138	122.936	105.275	89.22	79.587	71.56	61.239	52.064	44.495	89.45	72.248	49.083	23.853	44.725	11.697	1.567	1.457	1.621	2.567	1.737	0.714	0.813	0.95	1.121	1.256	1.397	1.633	1.921	2.247
Neogoniatites worki	Klug et al. (2006, text-fig. 33B)	58.852	27.265	18.756	110.023	100.162	90.494	75.992	63.037	54.142	47.954	40.8	32.872	81.455	64.777	36.353	14.502	53.561	21.656	1.351	1.397	1.734	3.307	1.699	0.909	0.998	1.105	1.316	1.586	1.847	2.085	2.451	3.042
Paraglyphioceras celeris	Korn & Ebbighausen (2008, text-fig. 48D)	48.817	33.578	25.245	124.51	100	82.598	72.059	65.686	60.295	57.108	52.451	46.324	76.225	60.539	47.304	36.274	58.824	36.274	1.633	1.364	1.389	1.574	2.048	0.803	1	1.211	1.388	1.522	1.659	1.751	1.907	2.159
Paraglyphioceras rudis	Korn & Ebbighausen (2008, text-fig. 46G)	52.681	32.465	21.645	122.101	96.928	82.107	68.932	60.697	56.228	53.875	52.229	48.228	78.094	72.696	55.287	31.761	33.642	6.587	1.564	1.129	1.098	1.696	1.898	0.819	1.032	1.218	1.451	1.648	1.778	1.856	1.915	2.073
Platygoniatites molaris	Ruzhencev & Bogoslovskaya (1971, text-fig. 41g)	83.539	64.471	24.047	182.406	163.476	147.103	134.055	129.708	109.241	90.82	83.658	78.542	96.894	88.518	48.095	30.7	42.725	5.117	1.883	1.662	2.697	2.958	1.197	0.548	0.612	0.68	0.746	0.771	0.915	1.101	1.195	1.273
Platygoniatites nudus	Ruzhencev & Bogoslovskaya (1971, text-fig. 41d)	69.947	50.798	26.862	158.777	146.011	132.979	121.011	112.5	101.596	84.84	71.011	64.628	91.223	73.404	42.021	25.266	48.67	19.149	1.741	1.812	2.677	3.358	1.43	0.63	0.685	0.752	0.826	0.889	0.984	1.179	1.408	1.547
Platygoniatites omniliratus	Ruzhencev & Bogoslovskaya (1971, text-fig. 39v)	77.003	57.623	25.84	179.328	158.656	138.76	122.222	117.313	104.393	81.137	72.351	66.925	97.933	85.788	51.163	33.85	46.253	10.594	1.831	1.617	2.293	2.397	1.299	0.558	0.63	0.721	0.818	0.852	0.958	1.232	1.382	1.494
Platygoniatites rhanemensis	Klug et al. (2006, text-fig. 41F)	47.548	36.888	28.359	159.274	144.136	133.049	112.58	90.192	83.155	75.693	64.391	56.077	94.67	74.414	49.894	21.109	49.253	20.469	1.682	1.788	1.808	3.586	2.103	0.628	0.694	0.752	0.888	1.109	1.203	1.321	1.553	1.783
Platygoniatites superior	Ruzhencev & Bogoslovskaya (1971, text-fig. 42v)	84.999	72.647	24.412	189.118	164.411	147.059	145.883	143.53	112.352	99.705	94.705	90.589	87.648	78.824	38.823	34.411	49.705	8.824	2.158	1.866	3.697	2.897	1.176	0.529	0.608	0.68	0.685	0.697	0.89	1.003	1.056	1.104
Progoniatites maghribensis	Korn et al. (2003, text-fig. 32B)	43.276	28.606	23.227	106.357	89.487	79.218	70.416	62.592	55.99	49.144	43.276	37.408	70.905	56.968	37.164	22.494	49.878	22.738	1.5	1.391	1.684	2.185	2.311	0.94	1.117	1.262	1.42	1.598	1.786	2.035	2.311	2.673
